# Supplementary material
Source: Royal Society of Chemistry journal article supplement (doi:10.1039/d6ma00114a)
Supplement: d6ma00114a1.xlsx [file d6ma00114a1.xlsx]

## Sheet: Table S1
	Table S1. Values of Corrosion rate (CR), Suface coverage (θ) and Inhibitory efficiency (IE%) of weight loss experiments in 1.0 M HCl with and without inhibitors (M1-M3) after 5 hours
	Figure 1a (M1), 1b (M2), Figure 1c (M3)
			Concentration	Initial Weight W1 (g)	Final Weight W2 (g)	Weight loss W (g)	Surface area	CR (cm.h-1)	±Error of CR	Surface coverage (θ)	IE %	±Error of IE
			(mM)				(cm2)
			0	0.985	0.888	0.097	6.6	0.00294		0	0
			M1
			0.2	0.864	0.849	0.015	5.98	0.00050167	1.004e-05	0.829328	82.9328	1.6586
			0.4	0.843	0.836	0.007	5.59	0.00025045	5e-06	0.914796	91.4796	1.8296
			0.6	0.969	0.964	0.005	7	0.00014286	2.86e-06	0.951399	95.1399	1.864
			0.8	1.234	1.228	0.006	7	0.00017143	3.42e-06	0.941679	94.1679	1.8834
			1	0.903	0.901	0.002	6.45	6.201e-05	1.24e-06	0.978902	97.8902	1.9578
			Standard Deviation			0.00484768		0.000168355			5.72755
			M2
			0.2	0.98	0.949	0.031	6	0.00103	2.06e-05	0.65	64.85	1.297
			0.4	0.922	0.899	0.023	6	0.000767	1.534e-05	0.74	73.92	1.4784
			0.6	1.075	1.051	0.024	7	0.000686	1.372e-05	0.77	76.67	1.5334
			0.8	0.787	0.771	0.016	6.02	0.000532	1.064e-05	0.82	81.92	1.6384
			1	0.91	0.896	0.014	6.3	0.000444	8.88e-06	0.85	84.88	1.6976
			Standard Deviation			0.00680441		0.000227491			7.7781
			M3
			0.2	0.947	0.925	0.022	6.02	0.000731	1.462e-05	0.75	75.13	1.5026
			0.4	0.953	0.938	0.015	6.24	0.000481	9.62e-06	0.84	83.64	1.6728
			0.6	0.952	0.94	0.012	6.02	0.000399	7.98e-06	0.86	86.44	1.7288
			0.8	0.709	0.704	0.005	5.2	0.000192	3.84e-06	0.93	93.46	1.8692
			1	0.857	0.853	0.004	5.46	0.000147	2.94e-06	0.95	95.02	1.9004
			Standard Deviation			0.0074364		0.000236059			8.03444

## Sheet: Table S2 
	Table S2. Values of Corrosion rate (CR), Suface coverage (θ) and Inhibitory efficiency (IE%) of weight loss experiments in 1.0 M HCl with and without inhibitors (M1-M3) against exposure time of 1-48 hours at 303K figure 2a, 2b (M1), 2c, 2d (M2), 2e, 2f (M3)
	M1											M2											M3
	Time (h)	Initial Weight W1 (g)	Final Weight W2 (g)	Weight loss W (g)	Density	CR (cm.h-1)	±Error of CR	Surface coverage (θ)	IE %	±Error of IE		Time (h)	Initial Weight W1 (g)	Final Weight W2 (g)	Weight loss W (g)	Density	CR (cm.h-1)	±Error of CR	Surface coverage (θ)	IE %	±Error of IE		Time (h)	Initial Weight W1 (g)	Final Weight W2 (g)	Weight loss W (g)	Density	CR (cm.h-1)	±Error of CR	Surface coverage (θ)	IE %	±Error of IE
					(g.cm-3)											(g.cm-3)											(g.cm-3)
	Blank											Blank											Blank
	1	0.985	0.97	0.015	5.33	0.000426		0	0			1	0.985	0.97	0.015	5.33	0.000426	8.52e-06	0	0			1	0.985	0.97	0.015	5.33	0.000426	8.52e-06	0	0
	5	0.97	0.931	0.039	5.25	0.000225		0	0			5	0.97	0.931	0.039	5.25	0.000225	4.5e-06	0	0			5	0.97	0.931	0.039	5.25	0.000225	4.5e-06	0	0
	12	0.931	0.888	0.043	5.04	0.000108		0	0			12	0.931	0.888	0.043	5.04	0.000108	2.16e-06	0	0			12	0.931	0.888	0.043	5.04	0.000108	2.16e-06	0	0
	24	0.888	0.864	0.024	4.81	3.15e-05		0	0			24	0.888	0.864	0.024	4.81	3.15e-05	6.3e-07	0	0			24	0.888	0.864	0.024	4.81	3.15e-05	6.3e-07	0	0
	48	0.864	0.788	0.076	4.68	5.13e-05		0	0			48	0.864	0.788	0.076	4.68	5.13e-05	1.026e-06	0	0			48	0.864	0.788	0.076	4.68	5.13e-05	1.026e-06	0	0
	SD			0.0233731		0.00016253						SD			0.0233731		0.00016253						SD			0.0233731		0.00016253
	0.2mM											0.2mM											0.2mM
	1	0.98	0.974	0.006	5.83	0.000171	3.43e-06	0.6	59.8	1.19592		1	0.864	0.855	0.009	5.16	0.000292	5.84e-06	0.32	31.6	0.632		1	0.947	0.939	0.008	5.62	0.000237	4.74e-06	0.45	44.53	0.8906
	5	0.974	0.963	0.011	5.8	6.32e-05	1.26e-06	0.72	71.91	1.43821		5	0.855	0.838	0.017	5.11	0.000111	2.22e-06	0.51	50.55	1.011		5	0.939	0.929	0.01	5.57	5.96e-05	1.192e-06	0.74	73.51	1.4702
	12	0.963	0.957	0.006	5.73	1.45e-05	2.9e-07	0.87	86.51	1.7302		12	0.838	0.825	0.013	5	3.62e-05	7.2e-07	0.66	66.41	1.3282		12	0.929	0.923	0.006	5.51	1.51e-05	3.02e-07	0.86	86.02	1.7204
	24	0.957	0.955	0.002	5.7	2.44e-06	5e-08	0.92	92.27	1.84535		24	0.825	0.82	0.005	4.93	7.07e-06	1.4e-07	0.78	77.58	1.5516		24	0.923	0.92	0.003	5.48	3.79e-06	7.58e-08	0.88	87.97	1.7594
	48	0.955	0.952	0.003	5.68	1.83e-06	4e-08	0.96	96.43	1.92858		48	0.82	0.805	0.015	4.9	1.07e-05	2.1e-07	0.79	79.2	1.584		48	0.92	0.912	0.008	5.46	5.07e-06	1.014e-07	0.9	90.11	1.8022
	SD			0.00350714		7.1861e-05		0.150266	15.2216						0.00481664		0.000119682		0.198671	20.0558			SD			0.00264575		9.92944e-05		0.187297	18.9632
	0.4mM											0.4mM											0.4mM
	1	0.922	0.917	0.005	5.49	0.000152	3.04e-06	0.64	64.39	1.28778		1	0.843	0.837	0.006	5.39	0.000199	3.98e-06	0.53	53.26	1.0652		1	0.953	0.946	0.007	5.45	0.000206	4.12e-06	0.52	51.77	1.0354
	5	0.917	0.908	0.009	5.46	5.5e-05	1.1e-06	0.76	75.59	1.51179		5	0.837	0.824	0.013	5.35	8.7e-05	1.74e-06	0.61	61.37	1.2274		5	0.946	0.938	0.008	5.41	4.74e-05	9.48e-07	0.79	78.97	1.5794
	12	0.908	0.903	0.005	5.4	1.28e-05	2.6e-07	0.88	88.08	1.76155		12	0.824	0.812	0.012	5.26	3.4e-05	6.8e-07	0.68	68.47	1.3694		12	0.938	0.932	0.006	5.37	1.49e-05	2.98e-07	0.86	86.15	1.723
	24	0.903	0.9015	0.0015	5.38	1.94e-06	4e-08	0.94	93.85	1.87708		24	0.812	0.808	0.004	5.19	5.75e-06	1.2e-07	0.82	81.77	1.6354		24	0.932	0.929	0.003	5.33	3.76e-06	7.52e-08	0.88	88.09	1.7618
	48	0.9015	0.8995	0.002	5.37	1.29e-06	3e-08	0.97	97.48	1.94956		48	0.808	0.797	0.011	5.16	7.94e-06	1.6e-07	0.85	84.52	1.6904		48	0.929	0.923	0.006	5.32	3.77e-06	7.54e-08	0.93	92.66	1.8532
	SD			0.003		6.39332e-05		0.136821	13.6984			SD			0.00396232		8.08584e-05		0.136272	13.2885			SD			0.00187083		8.61926e-05		0.162265	16.2821
	0.6mM											0.6mM											0.6mM
	1	1.075	1.07	0.005	6.38	0.00013	2.6e-06	0.69	69.46	1.38915		1	0.969	0.963	0.006	4.94	0.000173	3.46e-06	0.59	59.34	1.1868		1	0.952	0.946	0.006	5.65	0.000176	3.52e-06	0.59	58.61	1.1722
	5	1.07	1.062	0.008	6.35	4.19e-05	8.4e-07	0.81	81.4	1.62809		5	0.963	0.949	0.014	4.91	8.14e-05	1.63e-06	0.64	63.84	1.2768		5	0.946	0.937	0.009	5.61	5.33e-05	1.066e-06	0.76	76.34	1.5268
	12	1.062	1.058	0.004	6.3	8.79e-06	1.8e-07	0.92	91.85	1.8369		12	0.949	0.936	0.013	4.84	3.2e-05	6.4e-07	0.7	70.34	1.4068		12	0.937	0.933	0.004	5.56	9.96e-06	1.992e-07	0.91	90.76	1.8152
	24	1.058	1.0565	0.0015	6.28	1.65e-06	3e-08	0.95	94.75	1.89509		24	0.936	0.932	0.004	4.78	4.99e-06	1e-08	0.84	84.19	1.6838		24	0.933	0.931	0.002	5.54	2.5e-06	5e-08	0.92	92.07	1.8414
	48	1.0565	1.0542	0.0023	6.27	1.27e-06	3e-08	0.98	97.53	1.9505		48	0.932	0.922	0.01	4.76	6.26e-06	1.3e-07	0.88	87.8	1.756		48	0.931	0.929	0.002	5.52	1.25e-06	2.5e-08	0.98	97.56	1.9512
	SD			0.0025501		5.47601e-05		0.119373	11.5486			SD			0.0043359		7.05761e-05		0.125698	12.4678			SD			0.00296648		7.43524e-05		0.157702	15.7614
	0.8mM											0.8mM											0.8mM
	1	0.787	0.784	0.003	4.46	0.000107	2.13e-06	0.75	74.97	1.49936		1	1.234	1.227	0.007	6.3	0.000159	3.18e-06	0.63	62.75	1.255		1	0.709	0.706	0.003	4.87	0.000118	2.36e-06	0.72	72.21	1.4442
	5	0.784	0.779	0.005	4.44	3.57e-05	7.1e-07	0.84	84.14	1.68276		5	1.227	1.21	0.017	6.26	7.76e-05	1.55e-06	0.66	65.54	1.3108		5	0.706	0.7	0.006	4.85	4.76e-05	9.52e-07	0.79	78.86	1.5772
	12	0.779	0.777	0.002	4.42	5.99e-06	1.2e-07	0.94	94.44	1.88883		12	1.21	1.195	0.015	6.17	2.89e-05	5.8e-07	0.73	73.16	1.4632		12	0.7	0.6975	0.0025	4.81	8.33e-06	1.666e-07	0.92	92.27	1.8454
	24	0.777	0.776	0.001	4.4	1.5e-06	3e-08	0.95	95.24	1.90476		24	1.195	1.191	0.004	6.1	3.91e-06	8e-08	0.88	87.62	1.7524		24	0.6975	0.6965	0.001	4.79	1.67e-06	3.34e-08	0.95	94.7	1.894
	48	0.776	0.775	0.001	4.4	7.5e-07	2e-08	0.99	98.53	1.9707		48	1.191	1.184	0.007	6.08	3.43e-06	7e-08	0.93	93.32	1.8664		48	0.6965	0.696	0.0005	4.78	4.19e-07	8.38e-09	0.99	99.18	1.9836
	SD			0.00167332		4.52924e-05		0.0976217	9.73057			SD			0.00565685		6.57204e-05		0.133154	13.4806			SD			0.00216217		5.01637e-05		0.114149	11.3955
	1.0mM											1.0mM											1.0mM
	1	0.91	0.907	0.003	5.16	9.23e-05	1.84615e-06	0.78	78.35	1.56703		1	0.903	0.899	0.004	5	0.000124	2.48e-06	0.71	70.91	1.4182		1	0.857	0.8535	0.0035	5.61	0.000114	2.28e-06	0.73	73.18	1.4636
	5	0.907	0.906	0.001	5.14	6.17e-06	1.23484e-07	0.97	97.26	1.94516		5	0.899	0.89	0.009	4.98	5.61e-05	1.12e-06	0.75	75.1	1.502		5	0.8535	0.852	0.0015	5.58	9.84e-06	1.968e-07	0.96	95.63	1.9126
	12	0.906	0.906	0	5.14	0	0	1	100	2		12	0.89	0.882	0.008	4.93	2.1e-05	4.2e-07	0.81	80.54	1.6108		12	0.852	0.851	0.001	5.57	2.74e-06	5.48e-08	0.97	97.46	1.9492
	24	0.906	0.906	0	5.14	0	0	1	100	2		24	0.882	0.88	0.002	4.88	2.65e-06	5e-08	0.92	91.61	1.8322		24	0.851	0.8505	0.0005	5.57	6.85e-07	1.37e-08	0.98	97.83	1.9566
	48	0.906	0.906	0	5.14	0	0	1	100	2		48	0.88	0.877	0.003	4.87	1.99e-06	4e-08	0.96	96.12	1.9224		48	0.8505	0.85	0.0005	5.56	3.43e-07	6.86e-09	0.99	99.33	1.9866
	SD			0.00130384		4.06758e-05		0.0959166	9.4506			SD			0.00311448		5.12577e-05		0.107471	10.733			SD			0.00124499		4.96089e-05		0.110136	10.9835

## Sheet: Table S3
	Table S3. Values of Corrosion rate (CR), Suface coverage (θ) and Inhibitory efficiency (IE%) of weight loss experiments in 1.0 M HCl with and without inhibitors (M1-M3) against different temperature (303K-313K) and exposure time of 5 hours figure 3a, 3b (M1), 3c, 3d (M2), 3e, 3f (M3)
	M1												M2												M3
	Temperature	Concentration	Initial Weight W1 (g)	Final Weight W2 (g)	Weight loss W (g)	Surface exposed	CR (cm.h-1)	±Error of CR	Surface coverage (θ)	IE %	±Error of IE		Temperature	Concentration	Initial Weight W1 (g)	Final Weight W2 (g)	Weight loss W (g)	Surface exposed	CR (cm.h-1)	±Error of CR	Surface coverage (θ)	IE %	±Error of IE		Temperature	Concentration	Initial Weight W1 (g)	Final Weight W2 (g)	Weight loss W (g)	Surface exposed	CR (cm.h-1)	±Error of CR	Surface coverage (θ)	IE %	±Error of IE
	(K)	(mM)				(cm2)							(K)	(mM)				(cm2)							(K)	(mM)				(cm2)
	303	0	0.97	0.925	0.045	6.6	0.00136		0	0			303	0	0.97	0.925	0.045	6.6	0.00136		0	0			303	0	0.97	0.925	0.045	6.6	0.00136		0	0
		0.2	0.935	0.918	0.017	6.86	0.000496	9.92e-06	0.64	63.65	1.273			0.2	0.947	0.928	0.019	6.02	0.000631229	1.26246e-05	0.537099	53.7099	1.0742			0.2	0.864	0.84	0.024	5.98	0.000535117	1.07023e-05	0.607581	60.7581	1.21516
		0.4	0.781	0.768	0.013	7.2	0.000361	7.22e-06	0.74	73.52	1.4704			0.4	0.953	0.936	0.017	6.24	0.000544872	1.08974e-05	0.600427	60.0427	1.20085			0.4	0.843	0.828	0.015	5.59	0.00039356	7.8712e-06	0.711389	71.1389	1.42278
		0.6	1.024	1.012	0.012	7.65	0.000314	6.28e-06	0.77	76.99	1.5398			0.6	0.952	0.938	0.014	6.02	0.000465116	9.30233e-06	0.658915	65.8915	1.31783			0.6	0.969	0.958	0.011	7	0.000342857	6.85714e-06	0.748571	74.8571	1.49714
		0.8	0.793	0.787	0.006	5.72	0.00021	4.2e-06	0.85	84.62	1.6924			0.8	0.709	0.698	0.011	5.2	0.000423077	8.46154e-06	0.689744	68.9744	1.37949			0.8	1.234	1.228	0.006	7	0.000314286	6.28571e-06	0.769524	76.9524	1.53905
		1	0.749	0.745	0.004	5.04	0.000159	3.18e-06	0.88	88.36	1.7672			1	0.857	0.847	0.01	5.46	0.0003663	7.32601e-06	0.73138	73.138	1.46276			1	0.903	0.899	0.004	6.45	0.00027907	5.5814e-06	0.795349	79.5349	1.5907
	SD				0.0149053		0.000445477		0.328004	32.7794			SD				0.0130333		0.000368693		0.271428	27.1428			SD				0.0152414		0.000412729		0.303731	30.3731
	313	0	0.925	0.858	0.067	7	0.00191		0	0			313	0	0.925	0.858	0.067	7	0.00191		0	0			313	0	0.925	0.858	0.067	7	0.00191		0	0
		0.2	0.908	0.875	0.033	6.86	0.000962099	1.9242e-05	0.497411	49.7411	0.99482			0.2	1.052	1.008	0.044	6.11	0.00144	2.88052e-05	0.247624	24.7624	0.49525			0.2	1.066	1.032	0.034	6.5	0.00105	2.09231e-05	0.453502	45.3502	0.907
		0.4	0.731	0.707	0.024	7.2	0.000666667	1.33333e-05	0.651741	65.1741	1.30348			0.4	0.855	0.818	0.037	6.75	0.0011	2.19259e-05	0.427308	42.7308	0.85462			0.4	0.912	0.889	0.023	6.02	0.00076412	1.52824e-05	0.600833	60.0833	1.20167
		0.6	1.035	1.015	0.02	7.65	0.000522876	1.04575e-05	0.726856	72.6856	1.45371			0.6	1.016	0.985	0.031	7.36	0.000842391	1.68478e-05	0.559945	55.9945	1.11989			0.6	0.597	0.58	0.017	6.24	0.000544872	1.08974e-05	0.715365	71.5366	1.43073
		0.8	0.693	0.681	0.012	5.72	0.00041958	8.39161e-06	0.780816	78.0816	1.56163			0.8	0.81	0.788	0.022	6.02	0.000730897	1.46179e-05	0.618188	61.8188	1.23638			0.8	0.774	0.761	0.013	5.6	0.000464286	9.28571e-06	0.757463	75.7463	1.51493
		1	0.749	0.74	0.009	5.04	0.000357143	7.14286e-06	0.813433	81.3433	1.62687			1	1.154	1.132	0.022	7.14	0.000616246	1.23249e-05	0.67808	67.808	1.35616			1	0.829	0.816	0.013	6.02	0.000431894	8.63787e-06	0.774384	77.4384	1.54877
	SD				0.0211731		0.000581988		0.304873	30.4873			SD				0.0169401		0.00049154		0.257532	25.7532			SD				0.0207501		0.000563375		0.295002	29.5002
	323	0	0.858	0.762	0.096	6.6	0.00291		0	0			323	0	0.858	0.762	0.096	6.6	0.00291		0	0			323	0	0.858	0.762	0.096	6.6	0.00291		0	0
		0.2	0.87	0.819	0.051	6.16	0.00165584	3.31169e-05	0.430804	43.0804	0.86161			0.2	0.63	0.56	0.07	5.74	0.00244	4.87805e-05	0.161585	16.1585	0.32317			0.2	0.943	0.882	0.061	7	0.00174	3.48571e-05	0.400893	40.0893	0.80179
		0.4	1.037	0.996	0.041	7	0.00117143	2.34286e-05	0.597321	59.7321	1.19464			0.4	0.731	0.669	0.062	5.98	0.00207	4.14716e-05	0.287207	28.7207	0.57441			0.4	0.914	0.874	0.04	6.3	0.00127	2.53968e-05	0.563492	56.3492	1.12698
		0.6	0.845	0.815	0.03	6.45	0.000930233	1.86047e-05	0.680233	68.0233	1.36047			0.6	0.812	0.753	0.059	6.72	0.00176	3.5119e-05	0.396391	39.6391	0.79278			0.6	0.748	0.718	0.03	6.02	0.000996678	1.99336e-05	0.657392	65.7392	1.31478
		0.8	0.86	0.835	0.025	6.5	0.000769231	1.53846e-05	0.735577	73.5577	1.47115			0.8	0.874	0.825	0.049	6.3	0.00156	3.11111e-05	0.465278	46.5278	0.93056			0.8	0.883	0.855	0.028	6.45	0.000868217	1.73643e-05	0.70155	70.155	1.4031
		1	0.711	0.69	0.021	6.6	0.000636364	1.27273e-05	0.78125	78.125	1.5625			1	0.779	0.748	0.031	5.33	0.00116	2.32645e-05	0.600141	60.0141	1.20028			1	0.922	0.898	0.024	6.86	0.000699708	1.39942e-05	0.759475	75.9475	1.51895
	SD				0.0277417		0.000846367		0.290823	29.0823			SD				0.0217018		0.000629561		0.216322	21.6322			SD				0.0276532		0.000818203		0.281223	28.1223
	333	0	0.762	0.605	0.157	6.6	0.00476		0	0			333	0	0.762	0.605	0.157	6.6	0.00476		0	0			333	0	0.909	0.812	0.097	6.6	0.00476		0	0
		0.2	0.909	0.822	0.087	5.59	0.0031127	6.2254e-05	0.345738	34.5738	0.69148			0.2	0.9	0.76	0.14	6	0.00467	9.33333e-05	0.0191083	1.91083	0.03822			0.2	1.055	0.978	0.077	5.59	0.00347	6.94097e-05	0.270535	27.0535	0.54107
		0.4	1.055	0.982	0.073	6.5	0.00224615	4.49231e-05	0.527878	52.7878	1.05576			0.4	0.894	0.775	0.119	6.3	0.00378	7.55556e-05	0.205945	20.5945	0.41189			0.4	0.958	0.895	0.063	6.5	0.00237	4.73846e-05	0.502009	50.2009	1.00402
		0.6	0.958	0.899	0.059	6.5	0.00181538	3.63077e-05	0.618422	61.8422	1.23684			0.6	0.884	0.792	0.092	6.24	0.00295	5.89744e-05	0.380206	38.0206	0.76041			0.6	1.2	1.135	0.065	6.5	0.00194	3.87692e-05	0.592553	59.2553	1.18511
		0.8	1.2	1.148	0.052	7.5	0.00138667	2.77333e-05	0.708535	70.8535	1.41707			0.8	0.787	0.709	0.078	5.98	0.00261	5.21739e-05	0.451675	45.1675	0.90335			0.8	0.936	0.882	0.054	7.5	0.00173	3.46667e-05	0.635669	63.5669	1.27134
		1	0.936	0.896	0.04	7	0.00114286	2.28571e-05	0.759782	75.9782	1.51956			1	0.77	0.709	0.061	6.02	0.00203	4.05316e-05	0.574031	57.4031	1.14806			1	0.936	0.879	0.057	7	0.00154	3.08571e-05	0.675705	67.5705	1.35141
	SD				0.042019		0.00134533		0.282598	28.2598			SD				0.0371775		0.00112105		0.235591	23.5591			SD				0.0159301		0.00125307		0.261938	26.1938

## Sheet: Table S4
	Table S4. Values of lnCr and lnCr/T of weight loss experiment with and without inhibitors (M1-M3) at different concentration Figure 4a,4b (M1), 4c, 4d (M2), 4e, 4f (M3)
					lnCR										lnCR/T
				1/T (K-1)	0.2 mM	±Error of lnCR	0.4 mM	±Error of lnCR	0.6 mM	±Error of lnCR	0.8 mM	±Error of lnCR	1.0 mM	±Error of lnCR	0.2 mM	±Error of lnCR/T	0.4 mM	±Error of lnCR/T	0.6 mM	±Error of lnCR/T	0.8 mM	±Error of lnCR/T	1.0 mM	±Error of lnCR/T
				M1
				0.0033	-7.60969	-0.15219	-7.92632	-0.15853	-8.06699	-0.16134	-8.18172	-0.16363	-8.34284	-0.16686	-0.02511	-0.00050229	-0.02616	-0.00052319	-0.02662	-0.000532475	-0.027	-0.000540048	-0.02753	-0.000550682
				0.00319	-6.94639	-0.13893	-7.31322	-0.14626	-7.55617	-0.15112	-7.77626	-0.15553	-7.93737	-0.15875	-0.02219	-0.000443859	-0.02336	-0.000467298	-0.02414	-0.000482822	-0.02484	-0.000496885	-0.02536	-0.00050718
				0.0031	-6.40344	-0.12807	-6.74953	-0.13499	-6.98008	-0.1396	-7.17012	-0.1434	-7.35974	-0.14719	-0.01982	-0.000396498	-0.0209	-0.000417928	-0.02161	-0.000432203	-0.0222	-0.00044397	-0.02279	-0.000455711
				0.003	-5.77226	-0.11545	-6.09854	-0.12197	-6.31146	-0.12623	-6.58085	-0.13162	-6.77422	-0.13548	-0.01733	-0.000346683	-0.01831	-0.000366278	-0.01895	-0.000379067	-0.01976	-0.000395246	-0.02034	-0.00040686
				SD	0.782247		0.780944		0.755669		0.700843		0.684402		0.00332259		0.00335897		0.00329763		0.00314713		0.00311823
				M2
				0.0033	-7.05418	-0.14108	-7.51496	-0.1503	-7.82737	-0.15655	-8.08641	-0.16173	-8.26873	-0.16537	-0.0232811	-0.000465623	-0.0248018	-0.000496037	-0.0258329	-0.000516658	-0.0266878	-0.000533756	-0.0272895	-0.000545791
				0.00319	-6.54293	-0.13086	-6.81582	-0.13632	-7.07927	-0.14159	-7.22124	-0.14442	-7.39186	-0.14784	-0.0209039	-0.000418079	-0.0217758	-0.000435516	-0.0226175	-0.000452349	-0.023071	-0.000461421	-0.0236162	-0.000472324
				0.0031	-6.01616	-0.12032	-6.17848	-0.12357	-6.34474	-0.12689	-6.46592	-0.12932	-6.57963	-0.13159	-0.0186259	-0.000372517	-0.0191284	-0.000382568	-0.0196432	-0.000392863	-0.0200183	-0.000400367	-0.0203704	-0.000407407
				0.003	-5.50493	-0.1101	-5.63036	-0.11261	-5.75305	-0.11506	-5.89889	-0.11798	-6.03561	-0.12071	-0.0165313	-0.000330627	-0.016908	-0.000338159	-0.0172764	-0.000345529	-0.0177144	-0.000354288	-0.018125	-0.000362499
				SD	0.668041		0.813361		0.899496		0.948698		0.974845		0.00290945		0.00340701		0.0037063		0.00388808		0.0039905
				M3
				0.0033	-7.12756	-0.14255	-7.53012	-0.1506	-8.06521	-0.1613	-8.67134	-0.17343	-8.99498	-0.1799	-0.02352	-0.000470466	-0.02485	-0.000497038	-0.02662	-0.000532357	-0.02862	-0.000572366	-0.02969	-0.000593728
				0.00319	-6.6278	-0.13256	-7.01644	-0.14033	-7.51496	-0.1503	-7.84206	-0.15684	-8.23284	-0.16466	-0.02118	-0.000423501	-0.02242	-0.000448335	-0.02401	-0.000480189	-0.02505	-0.00050109	-0.0263	-0.00052606
				0.0031	-6.10639	-0.12213	-6.36876	-0.12738	-6.67469	-0.13349	-7.04907	-0.14098	-7.30741	-0.14615	-0.01891	-0.000378105	-0.01972	-0.00039435	-0.02066	-0.000413294	-0.02182	-0.000436475	-0.02262	-0.000452471
				0.003	-5.56534	-0.11131	-5.75427	-0.11509	-5.95818	-0.11916	-6.17539	-0.12351	-6.42005	-0.1284	-0.01671	-0.000334255	-0.01728	-0.000345602	-0.01789	-0.000357849	-0.01854	-0.000370894	-0.01928	-0.000385589
				SD	0.672465		0.772249		0.927312		1.06924		1.11763		0.00293084		0.00328113		0.00381768		0.00432206		0.00450762

## Sheet: Table S5
	Table S5. Values of lnCr and lnCr/T of weight loss experiment with and without inhibitors (M1-M3) at different concentration Figure 5a,5b (M1), 5c, 5d (M2), 5e, 5f (M3)
				1/T (K-1)	Cinh/Ф
					303K	±Error of lnCR	313K	±Error of lnCR	323K	±Error of lnCR	333K	±Error of lnCR
				M1
				0.2	0.3142	0.00628	0.40208	0.00804	0.46425	0.00928	0.57847	0.01157
				0.4	0.54408	0.01088	0.61374	0.01227	0.66966	0.01339	0.75775	0.01516
				0.6	0.77929	0.01559	0.82547	0.01651	0.88205	0.01764	0.97021	0.0194
				0.8	0.94545	0.01891	1.02457	0.02049	1.08758	0.02175	1.12909	0.02258
				1	1.13174	0.02263	1.22936	0.02459	1.28	0.0256	1.31617	0.02632
				SD	0.322824		0.326592		0.324087		0.292214
				M2
				0.2	0.54562	0.01091	0.80767	0.01615	1.23774	0.02475	1.37719	0.02754
				0.4	0.66619	0.01332	0.93609	0.01872	1.39272	0.02785	1.62614	0.03252
				0.6	0.84789	0.01696	1.07153	0.02143	1.51366	0.03027	1.80154	0.03603
				0.8	1.03311	0.02066	1.2941	0.02588	1.7194	0.03439	1.88877	0.03778
				1	1.23158	0.02463	1.47475	0.0295	1.91297	0.03826	2.01119	0.04022
				SD	0.275891		0.269179		0.266396		0.247009
				M3
				0.2	0.48618	0.00972	0.64758	0.01295	0.85496	0.0171	1.02389	0.02048
				0.4	0.65959	0.01319	0.75271	0.01505	0.97391	0.01948	1.19812	0.02396
				0.6	0.7797	0.01559	0.83873	0.01677	1.06001	0.0212	1.31367	0.02627
				0.8	0.91503	0.0183	1.00657	0.02013	1.14033	0.02281	1.42146	0.02843
				1	1.10006	0.022	1.16123	0.02322	1.29955	0.02599	1.52048	0.03041
				SD	0.235144		0.204344		0.16817		0.193692

## Sheet: Table S6
							Table S6. OCP curves for mild steel strips in 1.0 M HCl solution with and without the synthesized organic inhibitors (M1-M3) Figure 6 (M1=6a, M2=6b and M3=6c)
	M1																			M2																			M3
	Blank 1M HCl			0.1 mM			0.2mM			0.3mM			0.4mM			0.5mM				Blank 1M HCl			0.1 mM			0.2mM			0.3mM			0.4mM			0.5mM				Blank 1M HCl			0.1 mM			0.2mM			0.3mM
	Time (s)	E vs. SCE (V)	± error	Time (s)	E vs. SCE (V)	± error	Time (s)	E vs. SCE (V)	± error	Time (s)	E vs. SCE (V)	± error	Time (s)	E vs. SCE (V)	± error	Time (s)	E vs. SCE (V)	± error		Time (s)	E vs. SCE (V)	± error	Time (s)	E vs. SCE (V)	± error	Time (s)	E vs. SCE (V)	± error	Time (s)	E vs. SCE (V)	± error	Time (s)	E vs. SCE (V)	± error	Time (s)	E vs. SCE (V)	± error		Time (s)	E vs. SCE (V)	± error	Time (s)	E vs. SCE (V)	± error	Time (s)	E vs. SCE (V)	± error	Time (s)	E vs. SCE (V)
	0.51	-0.7578	-0.0007578	0.51	-0.6197	-0.0006197	0.51	-0.6233	-0.0006233	0.51	-0.6017	-0.0006017	0.51	-0.5591	-0.0005591	0.51	-0.5399	-0.0005399		0.51	-0.7578	-0.0007578	0.51	-0.6649	-0.0006649	0.51	-0.6374	-0.0006374	0.51	-0.6397	-0.0006397	0.51	-0.6265	-0.0006265	0.51	-0.6287	-0.0006287		0.51	-0.7578	-0.0007578	0.51	-0.6175	-0.0006175	0.51	-0.6375	-0.0006375	0.51	-0.6085
	1.02	-0.7578	-0.0007578	1.02	-0.6197	-0.0006197	1.02	-0.6233	-0.0006233	1.02	-0.6017	-0.0006017	1.02	-0.5591	-0.0005591	1.02	-0.5399	-0.0005399		1.02	-0.7578	-0.0007578	1.02	-0.6649	-0.0006649	1.02	-0.6374	-0.0006374	1.02	-0.6397	-0.0006397	1.02	-0.6265	-0.0006265	1.02	-0.6287	-0.0006287		1.02	-0.7578	-0.0007578	1.02	-0.6175	-0.0006175	1.02	-0.6375	-0.0006375	1.02	-0.6085
	1.53	-0.7578	-0.0007578	1.53	-0.6198	-0.0006198	1.53	-0.6233	-0.0006233	1.53	-0.6017	-0.0006017	1.53	-0.5591	-0.0005591	1.53	-0.5399	-0.0005399		1.53	-0.7578	-0.0007578	1.53	-0.6649	-0.0006649	1.53	-0.6374	-0.0006374	1.53	-0.6397	-0.0006397	1.53	-0.6265	-0.0006265	1.53	-0.6287	-0.0006287		1.53	-0.7578	-0.0007578	1.53	-0.6175	-0.0006175	1.53	-0.6375	-0.0006375	1.53	-0.6085
	2.04	-0.7579	-0.0007579	2.04	-0.6199	-0.0006199	2.04	-0.6233	-0.0006233	2.04	-0.6017	-0.0006017	2.04	-0.5591	-0.0005591	2.04	-0.54	-0.00054		2.04	-0.7579	-0.0007579	2.04	-0.6649	-0.0006649	2.04	-0.6375	-0.0006375	2.04	-0.6397	-0.0006397	2.04	-0.6265	-0.0006265	2.04	-0.6287	-0.0006287		2.04	-0.7579	-0.0007579	2.04	-0.6174	-0.0006174	2.04	-0.6375	-0.0006375	2.04	-0.6085
	2.55	-0.7579	-0.0007579	2.55	-0.6201	-0.0006201	2.55	-0.6234	-0.0006234	2.55	-0.6017	-0.0006017	2.55	-0.5592	-0.0005592	2.55	-0.5401	-0.0005401		2.55	-0.7579	-0.0007579	2.55	-0.6649	-0.0006649	2.55	-0.6375	-0.0006375	2.55	-0.6397	-0.0006397	2.55	-0.6266	-0.0006266	2.55	-0.6287	-0.0006287		2.55	-0.7579	-0.0007579	2.55	-0.6173	-0.0006173	2.55	-0.6375	-0.0006375	2.55	-0.6085
	3.06	-0.7578	-0.0007578	3.06	-0.6204	-0.0006204	3.06	-0.6235	-0.0006235	3.06	-0.6017	-0.0006017	3.06	-0.5593	-0.0005593	3.06	-0.5404	-0.0005404		3.06	-0.7578	-0.0007578	3.06	-0.6649	-0.0006649	3.06	-0.6376	-0.0006376	3.06	-0.6397	-0.0006397	3.06	-0.6266	-0.0006266	3.06	-0.6287	-0.0006287		3.06	-0.7578	-0.0007578	3.06	-0.6172	-0.0006172	3.06	-0.6375	-0.0006375	3.06	-0.6086
	3.57	-0.7577	-0.0007577	3.57	-0.6207	-0.0006207	3.57	-0.6237	-0.0006237	3.57	-0.6018	-0.0006018	3.57	-0.5594	-0.0005594	3.57	-0.5406	-0.0005406		3.57	-0.7577	-0.0007577	3.57	-0.6649	-0.0006649	3.57	-0.6376	-0.0006376	3.57	-0.6397	-0.0006397	3.57	-0.6267	-0.0006267	3.57	-0.6287	-0.0006287		3.57	-0.7577	-0.0007577	3.57	-0.6172	-0.0006172	3.57	-0.6376	-0.0006376	3.57	-0.6086
	4.08	-0.7575	-0.0007575	4.08	-0.621	-0.000621	4.08	-0.6238	-0.0006238	4.08	-0.6018	-0.0006018	4.08	-0.5595	-0.0005595	4.08	-0.5409	-0.0005409		4.08	-0.7575	-0.0007575	4.08	-0.6649	-0.0006649	4.08	-0.6376	-0.0006376	4.08	-0.6397	-0.0006397	4.08	-0.6268	-0.0006268	4.08	-0.6287	-0.0006287		4.08	-0.7575	-0.0007575	4.08	-0.6171	-0.0006171	4.08	-0.6376	-0.0006376	4.08	-0.6087
	4.59	-0.7572	-0.0007572	4.59	-0.6213	-0.0006213	4.59	-0.6239	-0.0006239	4.59	-0.6019	-0.0006019	4.59	-0.5596	-0.0005596	4.59	-0.5411	-0.0005411		4.59	-0.7572	-0.0007572	4.59	-0.6649	-0.0006649	4.59	-0.6377	-0.0006377	4.59	-0.6397	-0.0006397	4.59	-0.6269	-0.0006269	4.59	-0.6287	-0.0006287		4.59	-0.7572	-0.0007572	4.59	-0.6171	-0.0006171	4.59	-0.6376	-0.0006376	4.59	-0.6087
	5.1	-0.7569	-0.0007569	5.1	-0.6215	-0.0006215	5.1	-0.6241	-0.0006241	5.1	-0.602	-0.000602	5.1	-0.5597	-0.0005597	5.1	-0.5413	-0.0005413		5.1	-0.7569	-0.0007569	5.1	-0.6648	-0.0006648	5.1	-0.6377	-0.0006377	5.1	-0.6397	-0.0006397	5.1	-0.6269	-0.0006269	5.1	-0.6287	-0.0006287		5.1	-0.7569	-0.0007569	5.1	-0.617	-0.000617	5.1	-0.6376	-0.0006376	5.1	-0.6088
	5.61	-0.7565	-0.0007565	5.61	-0.6218	-0.0006218	5.61	-0.6242	-0.0006242	5.61	-0.6022	-0.0006022	5.61	-0.5598	-0.0005598	5.61	-0.5416	-0.0005416		5.61	-0.7565	-0.0007565	5.61	-0.6648	-0.0006648	5.61	-0.6377	-0.0006377	5.61	-0.6397	-0.0006397	5.61	-0.627	-0.000627	5.61	-0.6287	-0.0006287		5.61	-0.7565	-0.0007565	5.61	-0.617	-0.000617	5.61	-0.6376	-0.0006376	5.61	-0.6088
	6.12	-0.7562	-0.0007562	6.12	-0.6221	-0.0006221	6.12	-0.6243	-0.0006243	6.12	-0.6024	-0.0006024	6.12	-0.5599	-0.0005599	6.12	-0.5419	-0.0005419		6.12	-0.7562	-0.0007562	6.12	-0.6648	-0.0006648	6.12	-0.6378	-0.0006378	6.12	-0.6397	-0.0006397	6.12	-0.6271	-0.0006271	6.12	-0.6287	-0.0006287		6.12	-0.7562	-0.0007562	6.12	-0.6169	-0.0006169	6.12	-0.6375	-0.0006375	6.12	-0.6089
	6.63	-0.7561	-0.0007561	6.63	-0.6224	-0.0006224	6.63	-0.6244	-0.0006244	6.63	-0.6025	-0.0006025	6.63	-0.56	-0.00056	6.63	-0.5421	-0.0005421		6.63	-0.7561	-0.0007561	6.63	-0.6648	-0.0006648	6.63	-0.6378	-0.0006378	6.63	-0.6396	-0.0006396	6.63	-0.6271	-0.0006271	6.63	-0.6287	-0.0006287		6.63	-0.7561	-0.0007561	6.63	-0.6169	-0.0006169	6.63	-0.6375	-0.0006375	6.63	-0.6089
	7.14	-0.756	-0.000756	7.14	-0.6226	-0.0006226	7.14	-0.6245	-0.0006245	7.14	-0.6026	-0.0006026	7.14	-0.5601	-0.0005601	7.14	-0.5424	-0.0005424		7.14	-0.756	-0.000756	7.14	-0.6648	-0.0006648	7.14	-0.6378	-0.0006378	7.14	-0.6396	-0.0006396	7.14	-0.6272	-0.0006272	7.14	-0.6287	-0.0006287		7.14	-0.756	-0.000756	7.14	-0.6169	-0.0006169	7.14	-0.6375	-0.0006375	7.14	-0.609
	7.65	-0.756	-0.000756	7.65	-0.6229	-0.0006229	7.65	-0.6246	-0.0006246	7.65	-0.6028	-0.0006028	7.65	-0.5602	-0.0005602	7.65	-0.5426	-0.0005426		7.65	-0.756	-0.000756	7.65	-0.6648	-0.0006648	7.65	-0.6379	-0.0006379	7.65	-0.6396	-0.0006396	7.65	-0.6272	-0.0006272	7.65	-0.6287	-0.0006287		7.65	-0.756	-0.000756	7.65	-0.6168	-0.0006168	7.65	-0.6375	-0.0006375	7.65	-0.609
	8.16	-0.756	-0.000756	8.16	-0.6231	-0.0006231	8.16	-0.6248	-0.0006248	8.16	-0.6029	-0.0006029	8.16	-0.5603	-0.0005603	8.16	-0.5429	-0.0005429		8.16	-0.756	-0.000756	8.16	-0.6648	-0.0006648	8.16	-0.6379	-0.0006379	8.16	-0.6396	-0.0006396	8.16	-0.6273	-0.0006273	8.16	-0.6287	-0.0006287		8.16	-0.756	-0.000756	8.16	-0.6168	-0.0006168	8.16	-0.6375	-0.0006375	8.16	-0.609
	8.67	-0.7561	-0.0007561	8.67	-0.6234	-0.0006234	8.67	-0.6249	-0.0006249	8.67	-0.603	-0.000603	8.67	-0.5604	-0.0005604	8.67	-0.5432	-0.0005432		8.67	-0.7561	-0.0007561	8.67	-0.6648	-0.0006648	8.67	-0.6379	-0.0006379	8.67	-0.6396	-0.0006396	8.67	-0.6273	-0.0006273	8.67	-0.6287	-0.0006287		8.67	-0.7561	-0.0007561	8.67	-0.6167	-0.0006167	8.67	-0.6375	-0.0006375	8.67	-0.6091
	9.18	-0.7562	-0.0007562	9.18	-0.6236	-0.0006236	9.18	-0.625	-0.000625	9.18	-0.6031	-0.0006031	9.18	-0.5605	-0.0005605	9.18	-0.5434	-0.0005434		9.18	-0.7562	-0.0007562	9.18	-0.6647	-0.0006647	9.18	-0.6379	-0.0006379	9.18	-0.6396	-0.0006396	9.18	-0.6274	-0.0006274	9.18	-0.6287	-0.0006287		9.18	-0.7562	-0.0007562	9.18	-0.6166	-0.0006166	9.18	-0.6375	-0.0006375	9.18	-0.6091
	9.69	-0.7563	-0.0007563	9.69	-0.6239	-0.0006239	9.69	-0.6251	-0.0006251	9.69	-0.6031	-0.0006031	9.69	-0.5605	-0.0005605	9.69	-0.5437	-0.0005437		9.69	-0.7563	-0.0007563	9.69	-0.6647	-0.0006647	9.69	-0.638	-0.000638	9.69	-0.6396	-0.0006396	9.69	-0.6275	-0.0006275	9.69	-0.6287	-0.0006287		9.69	-0.7563	-0.0007563	9.69	-0.6166	-0.0006166	9.69	-0.6375	-0.0006375	9.69	-0.6092
	10.2	-0.7563	-0.0007563	10.2	-0.6241	-0.0006241	10.2	-0.6252	-0.0006252	10.2	-0.6032	-0.0006032	10.2	-0.5606	-0.0005606	10.2	-0.544	-0.000544		10.2	-0.7563	-0.0007563	10.2	-0.6647	-0.0006647	10.2	-0.638	-0.000638	10.2	-0.6396	-0.0006396	10.2	-0.6275	-0.0006275	10.2	-0.6287	-0.0006287		10.2	-0.7563	-0.0007563	10.2	-0.6166	-0.0006166	10.2	-0.6375	-0.0006375	10.2	-0.6092
	10.71	-0.7565	-0.0007565	10.71	-0.6243	-0.0006243	10.71	-0.6253	-0.0006253	10.71	-0.6033	-0.0006033	10.71	-0.5607	-0.0005607	10.71	-0.5443	-0.0005443		10.71	-0.7565	-0.0007565	10.71	-0.6647	-0.0006647	10.71	-0.638	-0.000638	10.71	-0.6396	-0.0006396	10.71	-0.6276	-0.0006276	10.71	-0.6287	-0.0006287		10.71	-0.7565	-0.0007565	10.71	-0.6166	-0.0006166	10.71	-0.6375	-0.0006375	10.71	-0.6093
	11.22	-0.7565	-0.0007565	11.22	-0.6246	-0.0006246	11.22	-0.6255	-0.0006255	11.22	-0.6034	-0.0006034	11.22	-0.5608	-0.0005608	11.22	-0.5446	-0.0005446		11.22	-0.7565	-0.0007565	11.22	-0.6647	-0.0006647	11.22	-0.6381	-0.0006381	11.22	-0.6396	-0.0006396	11.22	-0.6276	-0.0006276	11.22	-0.6287	-0.0006287		11.22	-0.7565	-0.0007565	11.22	-0.6166	-0.0006166	11.22	-0.6375	-0.0006375	11.22	-0.6093
	11.73	-0.7564	-0.0007564	11.73	-0.6248	-0.0006248	11.73	-0.6256	-0.0006256	11.73	-0.6035	-0.0006035	11.73	-0.5609	-0.0005609	11.73	-0.5449	-0.0005449		11.73	-0.7564	-0.0007564	11.73	-0.6647	-0.0006647	11.73	-0.6381	-0.0006381	11.73	-0.6396	-0.0006396	11.73	-0.6277	-0.0006277	11.73	-0.6287	-0.0006287		11.73	-0.7564	-0.0007564	11.73	-0.6166	-0.0006166	11.73	-0.6375	-0.0006375	11.73	-0.6094
	12.24	-0.7562	-0.0007562	12.24	-0.625	-0.000625	12.24	-0.6257	-0.0006257	12.24	-0.6035	-0.0006035	12.24	-0.561	-0.000561	12.24	-0.5452	-0.0005452		12.24	-0.7562	-0.0007562	12.24	-0.6646	-0.0006646	12.24	-0.6381	-0.0006381	12.24	-0.6396	-0.0006396	12.24	-0.6277	-0.0006277	12.24	-0.6287	-0.0006287		12.24	-0.7562	-0.0007562	12.24	-0.6166	-0.0006166	12.24	-0.6375	-0.0006375	12.24	-0.6094
	12.75	-0.756	-0.000756	12.75	-0.6252	-0.0006252	12.75	-0.6258	-0.0006258	12.75	-0.6035	-0.0006035	12.75	-0.5611	-0.0005611	12.75	-0.5455	-0.0005455		12.75	-0.756	-0.000756	12.75	-0.6646	-0.0006646	12.75	-0.6381	-0.0006381	12.75	-0.6396	-0.0006396	12.75	-0.6278	-0.0006278	12.75	-0.6287	-0.0006287		12.75	-0.756	-0.000756	12.75	-0.6166	-0.0006166	12.75	-0.6375	-0.0006375	12.75	-0.6094
	13.26	-0.7559	-0.0007559	13.26	-0.6254	-0.0006254	13.26	-0.6259	-0.0006259	13.26	-0.6036	-0.0006036	13.26	-0.5612	-0.0005612	13.26	-0.5457	-0.0005457		13.26	-0.7559	-0.0007559	13.26	-0.6646	-0.0006646	13.26	-0.6382	-0.0006382	13.26	-0.6396	-0.0006396	13.26	-0.6278	-0.0006278	13.26	-0.6286	-0.0006286		13.26	-0.7559	-0.0007559	13.26	-0.6166	-0.0006166	13.26	-0.6375	-0.0006375	13.26	-0.6095
	13.77	-0.7557	-0.0007557	13.77	-0.6256	-0.0006256	13.77	-0.626	-0.000626	13.77	-0.6037	-0.0006037	13.77	-0.5613	-0.0005613	13.77	-0.546	-0.000546		13.77	-0.7557	-0.0007557	13.77	-0.6646	-0.0006646	13.77	-0.6382	-0.0006382	13.77	-0.6396	-0.0006396	13.77	-0.6279	-0.0006279	13.77	-0.6286	-0.0006286		13.77	-0.7557	-0.0007557	13.77	-0.6166	-0.0006166	13.77	-0.6375	-0.0006375	13.77	-0.6095
	14.28	-0.7555	-0.0007555	14.28	-0.6258	-0.0006258	14.28	-0.6261	-0.0006261	14.28	-0.6039	-0.0006039	14.28	-0.5615	-0.0005615	14.28	-0.5463	-0.0005463		14.28	-0.7555	-0.0007555	14.28	-0.6646	-0.0006646	14.28	-0.6382	-0.0006382	14.28	-0.6395	-0.0006395	14.28	-0.6279	-0.0006279	14.28	-0.6286	-0.0006286		14.28	-0.7555	-0.0007555	14.28	-0.6166	-0.0006166	14.28	-0.6375	-0.0006375	14.28	-0.6096
	14.79	-0.7554	-0.0007554	14.79	-0.626	-0.000626	14.79	-0.6262	-0.0006262	14.79	-0.604	-0.000604	14.79	-0.5616	-0.0005616	14.79	-0.5466	-0.0005466		14.79	-0.7554	-0.0007554	14.79	-0.6646	-0.0006646	14.79	-0.6382	-0.0006382	14.79	-0.6395	-0.0006395	14.79	-0.628	-0.000628	14.79	-0.6286	-0.0006286		14.79	-0.7554	-0.0007554	14.79	-0.6166	-0.0006166	14.79	-0.6375	-0.0006375	14.79	-0.6097
	15.3	-0.7553	-0.0007553	15.3	-0.6262	-0.0006262	15.3	-0.6263	-0.0006263	15.3	-0.6041	-0.0006041	15.3	-0.5617	-0.0005617	15.3	-0.5469	-0.0005469		15.3	-0.7553	-0.0007553	15.3	-0.6646	-0.0006646	15.3	-0.6383	-0.0006383	15.3	-0.6395	-0.0006395	15.3	-0.628	-0.000628	15.3	-0.6286	-0.0006286		15.3	-0.7553	-0.0007553	15.3	-0.6166	-0.0006166	15.3	-0.6375	-0.0006375	15.3	-0.6097
	15.81	-0.7552	-0.0007552	15.81	-0.6264	-0.0006264	15.81	-0.6264	-0.0006264	15.81	-0.6042	-0.0006042	15.81	-0.5618	-0.0005618	15.81	-0.5473	-0.0005473		15.81	-0.7552	-0.0007552	15.81	-0.6645	-0.0006645	15.81	-0.6383	-0.0006383	15.81	-0.6395	-0.0006395	15.81	-0.6281	-0.0006281	15.81	-0.6286	-0.0006286		15.81	-0.7552	-0.0007552	15.81	-0.6166	-0.0006166	15.81	-0.6375	-0.0006375	15.81	-0.6098
	16.32	-0.7551	-0.0007551	16.32	-0.6266	-0.0006266	16.32	-0.6265	-0.0006265	16.32	-0.6042	-0.0006042	16.32	-0.562	-0.000562	16.32	-0.5476	-0.0005476		16.32	-0.7551	-0.0007551	16.32	-0.6645	-0.0006645	16.32	-0.6383	-0.0006383	16.32	-0.6395	-0.0006395	16.32	-0.6281	-0.0006281	16.32	-0.6287	-0.0006287		16.32	-0.7551	-0.0007551	16.32	-0.6166	-0.0006166	16.32	-0.6375	-0.0006375	16.32	-0.6099
	16.83	-0.7553	-0.0007553	16.83	-0.6268	-0.0006268	16.83	-0.6266	-0.0006266	16.83	-0.6043	-0.0006043	16.83	-0.5621	-0.0005621	16.83	-0.548	-0.000548		16.83	-0.7553	-0.0007553	16.83	-0.6645	-0.0006645	16.83	-0.6384	-0.0006384	16.83	-0.6395	-0.0006395	16.83	-0.6281	-0.0006281	16.83	-0.6287	-0.0006287		16.83	-0.7553	-0.0007553	16.83	-0.6166	-0.0006166	16.83	-0.6375	-0.0006375	16.83	-0.6099
	17.34	-0.756	-0.000756	17.34	-0.627	-0.000627	17.34	-0.6267	-0.0006267	17.34	-0.6044	-0.0006044	17.34	-0.5622	-0.0005622	17.34	-0.5484	-0.0005484		17.34	-0.756	-0.000756	17.34	-0.6645	-0.0006645	17.34	-0.6384	-0.0006384	17.34	-0.6395	-0.0006395	17.34	-0.6282	-0.0006282	17.34	-0.6287	-0.0006287		17.34	-0.756	-0.000756	17.34	-0.6166	-0.0006166	17.34	-0.6375	-0.0006375	17.34	-0.61
	17.85	-0.7571	-0.0007571	17.85	-0.6272	-0.0006272	17.85	-0.6268	-0.0006268	17.85	-0.6045	-0.0006045	17.85	-0.5624	-0.0005624	17.85	-0.5488	-0.0005488		17.85	-0.7571	-0.0007571	17.85	-0.6645	-0.0006645	17.85	-0.6384	-0.0006384	17.85	-0.6395	-0.0006395	17.85	-0.6282	-0.0006282	17.85	-0.6287	-0.0006287		17.85	-0.7571	-0.0007571	17.85	-0.6167	-0.0006167	17.85	-0.6375	-0.0006375	17.85	-0.61
	18.36	-0.758	-0.000758	18.36	-0.6274	-0.0006274	18.36	-0.6269	-0.0006269	18.36	-0.6045	-0.0006045	18.36	-0.5625	-0.0005625	18.36	-0.5492	-0.0005492		18.36	-0.758	-0.000758	18.36	-0.6645	-0.0006645	18.36	-0.6385	-0.0006385	18.36	-0.6395	-0.0006395	18.36	-0.6283	-0.0006283	18.36	-0.6287	-0.0006287		18.36	-0.758	-0.000758	18.36	-0.6167	-0.0006167	18.36	-0.6375	-0.0006375	18.36	-0.6101
	18.87	-0.7585	-0.0007585	18.87	-0.6276	-0.0006276	18.87	-0.627	-0.000627	18.87	-0.6046	-0.0006046	18.87	-0.5627	-0.0005627	18.87	-0.5496	-0.0005496		18.87	-0.7585	-0.0007585	18.87	-0.6644	-0.0006644	18.87	-0.6385	-0.0006385	18.87	-0.6395	-0.0006395	18.87	-0.6283	-0.0006283	18.87	-0.6287	-0.0006287		18.87	-0.7585	-0.0007585	18.87	-0.6167	-0.0006167	18.87	-0.6375	-0.0006375	18.87	-0.6101
	19.38	-0.7585	-0.0007585	19.38	-0.6277	-0.0006277	19.38	-0.6271	-0.0006271	19.38	-0.6047	-0.0006047	19.38	-0.5628	-0.0005628	19.38	-0.55	-0.00055		19.38	-0.7585	-0.0007585	19.38	-0.6644	-0.0006644	19.38	-0.6385	-0.0006385	19.38	-0.6395	-0.0006395	19.38	-0.6284	-0.0006284	19.38	-0.6287	-0.0006287		19.38	-0.7585	-0.0007585	19.38	-0.6167	-0.0006167	19.38	-0.6375	-0.0006375	19.38	-0.6102
	19.89	-0.7583	-0.0007583	19.89	-0.6279	-0.0006279	19.89	-0.6272	-0.0006272	19.89	-0.6048	-0.0006048	19.89	-0.563	-0.000563	19.89	-0.5504	-0.0005504		19.89	-0.7583	-0.0007583	19.89	-0.6644	-0.0006644	19.89	-0.6385	-0.0006385	19.89	-0.6395	-0.0006395	19.89	-0.6284	-0.0006284	19.89	-0.6287	-0.0006287		19.89	-0.7583	-0.0007583	19.89	-0.6166	-0.0006166	19.89	-0.6375	-0.0006375	19.89	-0.6102
	20.4	-0.7578	-0.0007578	20.4	-0.6281	-0.0006281	20.4	-0.6273	-0.0006273	20.4	-0.605	-0.000605	20.4	-0.5631	-0.0005631	20.4	-0.5508	-0.0005508		20.4	-0.7578	-0.0007578	20.4	-0.6644	-0.0006644	20.4	-0.6386	-0.0006386	20.4	-0.6395	-0.0006395	20.4	-0.6285	-0.0006285	20.4	-0.6287	-0.0006287		20.4	-0.7578	-0.0007578	20.4	-0.6166	-0.0006166	20.4	-0.6375	-0.0006375	20.4	-0.6103
	20.91	-0.7571	-0.0007571	20.91	-0.6282	-0.0006282	20.91	-0.6274	-0.0006274	20.91	-0.605	-0.000605	20.91	-0.5632	-0.0005632	20.91	-0.5512	-0.0005512		20.91	-0.7571	-0.0007571	20.91	-0.6644	-0.0006644	20.91	-0.6386	-0.0006386	20.91	-0.6395	-0.0006395	20.91	-0.6285	-0.0006285	20.91	-0.6287	-0.0006287		20.91	-0.7571	-0.0007571	20.91	-0.6165	-0.0006165	20.91	-0.6375	-0.0006375	20.91	-0.6103
	21.42	-0.7564	-0.0007564	21.42	-0.6284	-0.0006284	21.42	-0.6275	-0.0006275	21.42	-0.6051	-0.0006051	21.42	-0.5634	-0.0005634	21.42	-0.5517	-0.0005517		21.42	-0.7564	-0.0007564	21.42	-0.6644	-0.0006644	21.42	-0.6386	-0.0006386	21.42	-0.6395	-0.0006395	21.42	-0.6286	-0.0006286	21.42	-0.6287	-0.0006287		21.42	-0.7564	-0.0007564	21.42	-0.6164	-0.0006164	21.42	-0.6375	-0.0006375	21.42	-0.6104
	21.93	-0.7557	-0.0007557	21.93	-0.6286	-0.0006286	21.93	-0.6276	-0.0006276	21.93	-0.6052	-0.0006052	21.93	-0.5635	-0.0005635	21.93	-0.5521	-0.0005521		21.93	-0.7557	-0.0007557	21.93	-0.6643	-0.0006643	21.93	-0.6386	-0.0006386	21.93	-0.6395	-0.0006395	21.93	-0.6286	-0.0006286	21.93	-0.6287	-0.0006287		21.93	-0.7557	-0.0007557	21.93	-0.6163	-0.0006163	21.93	-0.6375	-0.0006375	21.93	-0.6105
	22.44	-0.7551	-0.0007551	22.44	-0.6287	-0.0006287	22.44	-0.6277	-0.0006277	22.44	-0.6052	-0.0006052	22.44	-0.5636	-0.0005636	22.44	-0.5526	-0.0005526		22.44	-0.7551	-0.0007551	22.44	-0.6643	-0.0006643	22.44	-0.6387	-0.0006387	22.44	-0.6394	-0.0006394	22.44	-0.6287	-0.0006287	22.44	-0.6287	-0.0006287		22.44	-0.7551	-0.0007551	22.44	-0.6162	-0.0006162	22.44	-0.6375	-0.0006375	22.44	-0.6105
	22.95	-0.7546	-0.0007546	22.95	-0.6289	-0.0006289	22.95	-0.6278	-0.0006278	22.95	-0.6053	-0.0006053	22.95	-0.5638	-0.0005638	22.95	-0.553	-0.000553		22.95	-0.7546	-0.0007546	22.95	-0.6643	-0.0006643	22.95	-0.6387	-0.0006387	22.95	-0.6394	-0.0006394	22.95	-0.6287	-0.0006287	22.95	-0.6287	-0.0006287		22.95	-0.7546	-0.0007546	22.95	-0.6162	-0.0006162	22.95	-0.6375	-0.0006375	22.95	-0.6106
	23.46	-0.7542	-0.0007542	23.46	-0.629	-0.000629	23.46	-0.6279	-0.0006279	23.46	-0.6053	-0.0006053	23.46	-0.5639	-0.0005639	23.46	-0.5535	-0.0005535		23.46	-0.7542	-0.0007542	23.46	-0.6643	-0.0006643	23.46	-0.6387	-0.0006387	23.46	-0.6394	-0.0006394	23.46	-0.6288	-0.0006288	23.46	-0.6287	-0.0006287		23.46	-0.7542	-0.0007542	23.46	-0.6162	-0.0006162	23.46	-0.6375	-0.0006375	23.46	-0.6107
	23.97	-0.7538	-0.0007538	23.97	-0.6292	-0.0006292	23.97	-0.6279	-0.0006279	23.97	-0.6053	-0.0006053	23.97	-0.5641	-0.0005641	23.97	-0.554	-0.000554		23.97	-0.7538	-0.0007538	23.97	-0.6643	-0.0006643	23.97	-0.6387	-0.0006387	23.97	-0.6394	-0.0006394	23.97	-0.6288	-0.0006288	23.97	-0.6287	-0.0006287		23.97	-0.7538	-0.0007538	23.97	-0.6162	-0.0006162	23.97	-0.6375	-0.0006375	23.97	-0.6108
	24.48	-0.7535	-0.0007535	24.48	-0.6293	-0.0006293	24.48	-0.628	-0.000628	24.48	-0.6054	-0.0006054	24.48	-0.5642	-0.0005642	24.48	-0.5546	-0.0005546		24.48	-0.7535	-0.0007535	24.48	-0.6642	-0.0006642	24.48	-0.6388	-0.0006388	24.48	-0.6394	-0.0006394	24.48	-0.6289	-0.0006289	24.48	-0.6287	-0.0006287		24.48	-0.7535	-0.0007535	24.48	-0.6162	-0.0006162	24.48	-0.6375	-0.0006375	24.48	-0.6109
	24.99	-0.7533	-0.0007533	24.99	-0.6295	-0.0006295	24.99	-0.6281	-0.0006281	24.99	-0.6055	-0.0006055	24.99	-0.5644	-0.0005644	24.99	-0.5551	-0.0005551		24.99	-0.7533	-0.0007533	24.99	-0.6642	-0.0006642	24.99	-0.6388	-0.0006388	24.99	-0.6394	-0.0006394	24.99	-0.6289	-0.0006289	24.99	-0.6286	-0.0006286		24.99	-0.7533	-0.0007533	24.99	-0.6161	-0.0006161	24.99	-0.6375	-0.0006375	24.99	-0.611
	25.5	-0.753	-0.000753	25.5	-0.6296	-0.0006296	25.5	-0.6282	-0.0006282	25.5	-0.6056	-0.0006056	25.5	-0.5645	-0.0005645	25.5	-0.5556	-0.0005556		25.5	-0.753	-0.000753	25.5	-0.6642	-0.0006642	25.5	-0.6388	-0.0006388	25.5	-0.6394	-0.0006394	25.5	-0.6289	-0.0006289	25.5	-0.6286	-0.0006286		25.5	-0.753	-0.000753	25.5	-0.616	-0.000616	25.5	-0.6375	-0.0006375	25.5	-0.611
	26.01	-0.7527	-0.0007527	26.01	-0.6298	-0.0006298	26.01	-0.6283	-0.0006283	26.01	-0.6056	-0.0006056	26.01	-0.5647	-0.0005647	26.01	-0.5561	-0.0005561		26.01	-0.7527	-0.0007527	26.01	-0.6642	-0.0006642	26.01	-0.6388	-0.0006388	26.01	-0.6394	-0.0006394	26.01	-0.629	-0.000629	26.01	-0.6286	-0.0006286		26.01	-0.7527	-0.0007527	26.01	-0.616	-0.000616	26.01	-0.6375	-0.0006375	26.01	-0.6111
	26.52	-0.7526	-0.0007526	26.52	-0.6299	-0.0006299	26.52	-0.6284	-0.0006284	26.52	-0.6057	-0.0006057	26.52	-0.5648	-0.0005648	26.52	-0.5567	-0.0005567		26.52	-0.7526	-0.0007526	26.52	-0.6642	-0.0006642	26.52	-0.6388	-0.0006388	26.52	-0.6394	-0.0006394	26.52	-0.629	-0.000629	26.52	-0.6287	-0.0006287		26.52	-0.7526	-0.0007526	26.52	-0.616	-0.000616	26.52	-0.6375	-0.0006375	26.52	-0.6111
	27.03	-0.7526	-0.0007526	27.03	-0.63	-0.00063	27.03	-0.6284	-0.0006284	27.03	-0.6058	-0.0006058	27.03	-0.565	-0.000565	27.03	-0.5573	-0.0005573		27.03	-0.7526	-0.0007526	27.03	-0.6641	-0.0006641	27.03	-0.6389	-0.0006389	27.03	-0.6394	-0.0006394	27.03	-0.629	-0.000629	27.03	-0.6287	-0.0006287		27.03	-0.7526	-0.0007526	27.03	-0.616	-0.000616	27.03	-0.6375	-0.0006375	27.03	-0.6112
	27.54	-0.7529	-0.0007529	27.54	-0.6302	-0.0006302	27.54	-0.6285	-0.0006285	27.54	-0.6059	-0.0006059	27.54	-0.5651	-0.0005651	27.54	-0.5579	-0.0005579		27.54	-0.7529	-0.0007529	27.54	-0.6641	-0.0006641	27.54	-0.6389	-0.0006389	27.54	-0.6394	-0.0006394	27.54	-0.6291	-0.0006291	27.54	-0.6287	-0.0006287		27.54	-0.7529	-0.0007529	27.54	-0.616	-0.000616	27.54	-0.6375	-0.0006375	27.54	-0.6113
	28.05	-0.7531	-0.0007531	28.05	-0.6303	-0.0006303	28.05	-0.6286	-0.0006286	28.05	-0.606	-0.000606	28.05	-0.5653	-0.0005653	28.05	-0.5585	-0.0005585		28.05	-0.7531	-0.0007531	28.05	-0.6641	-0.0006641	28.05	-0.6389	-0.0006389	28.05	-0.6394	-0.0006394	28.05	-0.6291	-0.0006291	28.05	-0.6287	-0.0006287		28.05	-0.7531	-0.0007531	28.05	-0.616	-0.000616	28.05	-0.6375	-0.0006375	28.05	-0.6113
	28.56	-0.7532	-0.0007532	28.56	-0.6304	-0.0006304	28.56	-0.6287	-0.0006287	28.56	-0.606	-0.000606	28.56	-0.5655	-0.0005655	28.56	-0.5591	-0.0005591		28.56	-0.7532	-0.0007532	28.56	-0.6641	-0.0006641	28.56	-0.6389	-0.0006389	28.56	-0.6394	-0.0006394	28.56	-0.6292	-0.0006292	28.56	-0.6287	-0.0006287		28.56	-0.7532	-0.0007532	28.56	-0.6161	-0.0006161	28.56	-0.6375	-0.0006375	28.56	-0.6114
	29.07	-0.7532	-0.0007532	29.07	-0.6306	-0.0006306	29.07	-0.6287	-0.0006287	29.07	-0.606	-0.000606	29.07	-0.5656	-0.0005656	29.07	-0.5597	-0.0005597		29.07	-0.7532	-0.0007532	29.07	-0.6641	-0.0006641	29.07	-0.6389	-0.0006389	29.07	-0.6394	-0.0006394	29.07	-0.6292	-0.0006292	29.07	-0.6287	-0.0006287		29.07	-0.7532	-0.0007532	29.07	-0.6161	-0.0006161	29.07	-0.6375	-0.0006375	29.07	-0.6115
	29.58	-0.753	-0.000753	29.58	-0.6307	-0.0006307	29.58	-0.6288	-0.0006288	29.58	-0.606	-0.000606	29.58	-0.5658	-0.0005658	29.58	-0.5604	-0.0005604		29.58	-0.753	-0.000753	29.58	-0.664	-0.000664	29.58	-0.639	-0.000639	29.58	-0.6394	-0.0006394	29.58	-0.6292	-0.0006292	29.58	-0.6287	-0.0006287		29.58	-0.753	-0.000753	29.58	-0.616	-0.000616	29.58	-0.6375	-0.0006375	29.58	-0.6115
	30.09	-0.7527	-0.0007527	30.09	-0.6308	-0.0006308	30.09	-0.6289	-0.0006289	30.09	-0.606	-0.000606	30.09	-0.566	-0.000566	30.09	-0.561	-0.000561		30.09	-0.7527	-0.0007527	30.09	-0.664	-0.000664	30.09	-0.639	-0.000639	30.09	-0.6394	-0.0006394	30.09	-0.6293	-0.0006293	30.09	-0.6287	-0.0006287		30.09	-0.7527	-0.0007527	30.09	-0.616	-0.000616	30.09	-0.6376	-0.0006376	30.09	-0.6116
	30.6	-0.7524	-0.0007524	30.6	-0.6309	-0.0006309	30.6	-0.629	-0.000629	30.6	-0.6061	-0.0006061	30.6	-0.5661	-0.0005661	30.6	-0.5616	-0.0005616		30.6	-0.7524	-0.0007524	30.6	-0.664	-0.000664	30.6	-0.639	-0.000639	30.6	-0.6393	-0.0006393	30.6	-0.6293	-0.0006293	30.6	-0.6287	-0.0006287		30.6	-0.7524	-0.0007524	30.6	-0.6159	-0.0006159	30.6	-0.6376	-0.0006376	30.6	-0.6116
	31.11	-0.752	-0.000752	31.11	-0.6311	-0.0006311	31.11	-0.6291	-0.0006291	31.11	-0.6062	-0.0006062	31.11	-0.5663	-0.0005663	31.11	-0.5623	-0.0005623		31.11	-0.752	-0.000752	31.11	-0.664	-0.000664	31.11	-0.639	-0.000639	31.11	-0.6393	-0.0006393	31.11	-0.6293	-0.0006293	31.11	-0.6287	-0.0006287		31.11	-0.752	-0.000752	31.11	-0.6158	-0.0006158	31.11	-0.6376	-0.0006376	31.11	-0.6117
	31.62	-0.7516	-0.0007516	31.62	-0.6312	-0.0006312	31.62	-0.6291	-0.0006291	31.62	-0.6062	-0.0006062	31.62	-0.5665	-0.0005665	31.62	-0.5629	-0.0005629		31.62	-0.7516	-0.0007516	31.62	-0.664	-0.000664	31.62	-0.639	-0.000639	31.62	-0.6393	-0.0006393	31.62	-0.6294	-0.0006294	31.62	-0.6287	-0.0006287		31.62	-0.7516	-0.0007516	31.62	-0.6157	-0.0006157	31.62	-0.6376	-0.0006376	31.62	-0.6118
	32.13	-0.7512	-0.0007512	32.13	-0.6313	-0.0006313	32.13	-0.6292	-0.0006292	32.13	-0.6063	-0.0006063	32.13	-0.5667	-0.0005667	32.13	-0.5635	-0.0005635		32.13	-0.7512	-0.0007512	32.13	-0.664	-0.000664	32.13	-0.639	-0.000639	32.13	-0.6393	-0.0006393	32.13	-0.6294	-0.0006294	32.13	-0.6287	-0.0006287		32.13	-0.7512	-0.0007512	32.13	-0.6157	-0.0006157	32.13	-0.6376	-0.0006376	32.13	-0.6118
	32.64	-0.7509	-0.0007509	32.64	-0.6314	-0.0006314	32.64	-0.6293	-0.0006293	32.64	-0.6064	-0.0006064	32.64	-0.5668	-0.0005668	32.64	-0.5641	-0.0005641		32.64	-0.7509	-0.0007509	32.64	-0.6639	-0.0006639	32.64	-0.639	-0.000639	32.64	-0.6393	-0.0006393	32.64	-0.6294	-0.0006294	32.64	-0.6287	-0.0006287		32.64	-0.7509	-0.0007509	32.64	-0.6157	-0.0006157	32.64	-0.6376	-0.0006376	32.64	-0.6119
	33.15	-0.7505	-0.0007505	33.15	-0.6315	-0.0006315	33.15	-0.6293	-0.0006293	33.15	-0.6065	-0.0006065	33.15	-0.567	-0.000567	33.15	-0.5648	-0.0005648		33.15	-0.7505	-0.0007505	33.15	-0.6639	-0.0006639	33.15	-0.6391	-0.0006391	33.15	-0.6393	-0.0006393	33.15	-0.6295	-0.0006295	33.15	-0.6287	-0.0006287		33.15	-0.7505	-0.0007505	33.15	-0.6157	-0.0006157	33.15	-0.6376	-0.0006376	33.15	-0.612
	33.66	-0.7501	-0.0007501	33.66	-0.6317	-0.0006317	33.66	-0.6294	-0.0006294	33.66	-0.6066	-0.0006066	33.66	-0.5672	-0.0005672	33.66	-0.5655	-0.0005655		33.66	-0.7501	-0.0007501	33.66	-0.6639	-0.0006639	33.66	-0.6391	-0.0006391	33.66	-0.6393	-0.0006393	33.66	-0.6295	-0.0006295	33.66	-0.6286	-0.0006286		33.66	-0.7501	-0.0007501	33.66	-0.6157	-0.0006157	33.66	-0.6376	-0.0006376	33.66	-0.612
	34.17	-0.7497	-0.0007497	34.17	-0.6318	-0.0006318	34.17	-0.6295	-0.0006295	34.17	-0.6067	-0.0006067	34.17	-0.5674	-0.0005674	34.17	-0.5663	-0.0005663		34.17	-0.7497	-0.0007497	34.17	-0.6639	-0.0006639	34.17	-0.6391	-0.0006391	34.17	-0.6393	-0.0006393	34.17	-0.6295	-0.0006295	34.17	-0.6286	-0.0006286		34.17	-0.7497	-0.0007497	34.17	-0.6157	-0.0006157	34.17	-0.6376	-0.0006376	34.17	-0.6121
	34.68	-0.7493	-0.0007493	34.68	-0.6319	-0.0006319	34.68	-0.6295	-0.0006295	34.68	-0.6068	-0.0006068	34.68	-0.5676	-0.0005676	34.68	-0.5671	-0.0005671		34.68	-0.7493	-0.0007493	34.68	-0.6638	-0.0006638	34.68	-0.6391	-0.0006391	34.68	-0.6393	-0.0006393	34.68	-0.6296	-0.0006296	34.68	-0.6286	-0.0006286		34.68	-0.7493	-0.0007493	34.68	-0.6156	-0.0006156	34.68	-0.6376	-0.0006376	34.68	-0.6122
	35.19	-0.749	-0.000749	35.19	-0.632	-0.000632	35.19	-0.6296	-0.0006296	35.19	-0.6068	-0.0006068	35.19	-0.5678	-0.0005678	35.19	-0.568	-0.000568		35.19	-0.749	-0.000749	35.19	-0.6638	-0.0006638	35.19	-0.6391	-0.0006391	35.19	-0.6393	-0.0006393	35.19	-0.6296	-0.0006296	35.19	-0.6286	-0.0006286		35.19	-0.749	-0.000749	35.19	-0.6156	-0.0006156	35.19	-0.6376	-0.0006376	35.19	-0.6123
	35.7	-0.7486	-0.0007486	35.7	-0.6321	-0.0006321	35.7	-0.6297	-0.0006297	35.7	-0.6069	-0.0006069	35.7	-0.5679	-0.0005679	35.7	-0.5689	-0.0005689		35.7	-0.7486	-0.0007486	35.7	-0.6638	-0.0006638	35.7	-0.6391	-0.0006391	35.7	-0.6393	-0.0006393	35.7	-0.6296	-0.0006296	35.7	-0.6286	-0.0006286		35.7	-0.7486	-0.0007486	35.7	-0.6156	-0.0006156	35.7	-0.6376	-0.0006376	35.7	-0.6123
	36.21	-0.7483	-0.0007483	36.21	-0.6322	-0.0006322	36.21	-0.6298	-0.0006298	36.21	-0.6069	-0.0006069	36.21	-0.5682	-0.0005682	36.21	-0.5698	-0.0005698		36.21	-0.7483	-0.0007483	36.21	-0.6638	-0.0006638	36.21	-0.6391	-0.0006391	36.21	-0.6393	-0.0006393	36.21	-0.6297	-0.0006297	36.21	-0.6287	-0.0006287		36.21	-0.7483	-0.0007483	36.21	-0.6156	-0.0006156	36.21	-0.6376	-0.0006376	36.21	-0.6124
	36.72	-0.7479	-0.0007479	36.72	-0.6323	-0.0006323	36.72	-0.6298	-0.0006298	36.72	-0.607	-0.000607	36.72	-0.5684	-0.0005684	36.72	-0.5706	-0.0005706		36.72	-0.7479	-0.0007479	36.72	-0.6638	-0.0006638	36.72	-0.6392	-0.0006392	36.72	-0.6393	-0.0006393	36.72	-0.6297	-0.0006297	36.72	-0.6287	-0.0006287		36.72	-0.7479	-0.0007479	36.72	-0.6156	-0.0006156	36.72	-0.6376	-0.0006376	36.72	-0.6125
	37.23	-0.7476	-0.0007476	37.23	-0.6324	-0.0006324	37.23	-0.6299	-0.0006299	37.23	-0.607	-0.000607	37.23	-0.5686	-0.0005686	37.23	-0.5714	-0.0005714		37.23	-0.7476	-0.0007476	37.23	-0.6637	-0.0006637	37.23	-0.6392	-0.0006392	37.23	-0.6393	-0.0006393	37.23	-0.6297	-0.0006297	37.23	-0.6287	-0.0006287		37.23	-0.7476	-0.0007476	37.23	-0.6156	-0.0006156	37.23	-0.6376	-0.0006376	37.23	-0.6126
	37.74	-0.7473	-0.0007473	37.74	-0.6325	-0.0006325	37.74	-0.63	-0.00063	37.74	-0.6071	-0.0006071	37.74	-0.5689	-0.0005689	37.74	-0.5721	-0.0005721		37.74	-0.7473	-0.0007473	37.74	-0.6637	-0.0006637	37.74	-0.6392	-0.0006392	37.74	-0.6393	-0.0006393	37.74	-0.6298	-0.0006298	37.74	-0.6287	-0.0006287		37.74	-0.7473	-0.0007473	37.74	-0.6156	-0.0006156	37.74	-0.6376	-0.0006376	37.74	-0.6126
	38.25	-0.747	-0.000747	38.25	-0.6326	-0.0006326	38.25	-0.63	-0.00063	38.25	-0.6071	-0.0006071	38.25	-0.5691	-0.0005691	38.25	-0.5728	-0.0005728		38.25	-0.747	-0.000747	38.25	-0.6637	-0.0006637	38.25	-0.6392	-0.0006392	38.25	-0.6393	-0.0006393	38.25	-0.6298	-0.0006298	38.25	-0.6287	-0.0006287		38.25	-0.747	-0.000747	38.25	-0.6157	-0.0006157	38.25	-0.6376	-0.0006376	38.25	-0.6127
	38.76	-0.7465	-0.0007465	38.76	-0.6327	-0.0006327	38.76	-0.6301	-0.0006301	38.76	-0.6071	-0.0006071	38.76	-0.5694	-0.0005694	38.76	-0.5735	-0.0005735		38.76	-0.7465	-0.0007465	38.76	-0.6637	-0.0006637	38.76	-0.6392	-0.0006392	38.76	-0.6393	-0.0006393	38.76	-0.6298	-0.0006298	38.76	-0.6287	-0.0006287		38.76	-0.7465	-0.0007465	38.76	-0.6157	-0.0006157	38.76	-0.6376	-0.0006376	38.76	-0.6128
	39.27	-0.7459	-0.0007459	39.27	-0.6328	-0.0006328	39.27	-0.6301	-0.0006301	39.27	-0.6072	-0.0006072	39.27	-0.5696	-0.0005696	39.27	-0.574	-0.000574		39.27	-0.7459	-0.0007459	39.27	-0.6637	-0.0006637	39.27	-0.6392	-0.0006392	39.27	-0.6393	-0.0006393	39.27	-0.6299	-0.0006299	39.27	-0.6286	-0.0006286		39.27	-0.7459	-0.0007459	39.27	-0.6158	-0.0006158	39.27	-0.6376	-0.0006376	39.27	-0.6128
	39.78	-0.7454	-0.0007454	39.78	-0.6329	-0.0006329	39.78	-0.6302	-0.0006302	39.78	-0.6072	-0.0006072	39.78	-0.5698	-0.0005698	39.78	-0.5746	-0.0005746		39.78	-0.7454	-0.0007454	39.78	-0.6637	-0.0006637	39.78	-0.6392	-0.0006392	39.78	-0.6393	-0.0006393	39.78	-0.6299	-0.0006299	39.78	-0.6286	-0.0006286		39.78	-0.7454	-0.0007454	39.78	-0.6159	-0.0006159	39.78	-0.6376	-0.0006376	39.78	-0.6129
	40.29	-0.7449	-0.0007449	40.29	-0.633	-0.000633	40.29	-0.6303	-0.0006303	40.29	-0.6073	-0.0006073	40.29	-0.5701	-0.0005701	40.29	-0.575	-0.000575		40.29	-0.7449	-0.0007449	40.29	-0.6636	-0.0006636	40.29	-0.6392	-0.0006392	40.29	-0.6392	-0.0006392	40.29	-0.6299	-0.0006299	40.29	-0.6286	-0.0006286		40.29	-0.7449	-0.0007449	40.29	-0.6159	-0.0006159	40.29	-0.6376	-0.0006376	40.29	-0.613
	40.8	-0.7445	-0.0007445	40.8	-0.6332	-0.0006332	40.8	-0.6303	-0.0006303	40.8	-0.6073	-0.0006073	40.8	-0.5703	-0.0005703	40.8	-0.5754	-0.0005754		40.8	-0.7445	-0.0007445	40.8	-0.6636	-0.0006636	40.8	-0.6392	-0.0006392	40.8	-0.6392	-0.0006392	40.8	-0.63	-0.00063	40.8	-0.6286	-0.0006286		40.8	-0.7445	-0.0007445	40.8	-0.616	-0.000616	40.8	-0.6376	-0.0006376	40.8	-0.613
	41.31	-0.7442	-0.0007442	41.31	-0.6333	-0.0006333	41.31	-0.6304	-0.0006304	41.31	-0.6073	-0.0006073	41.31	-0.5705	-0.0005705	41.31	-0.5758	-0.0005758		41.31	-0.7442	-0.0007442	41.31	-0.6636	-0.0006636	41.31	-0.6393	-0.0006393	41.31	-0.6392	-0.0006392	41.31	-0.63	-0.00063	41.31	-0.6286	-0.0006286		41.31	-0.7442	-0.0007442	41.31	-0.616	-0.000616	41.31	-0.6376	-0.0006376	41.31	-0.6131
	41.82	-0.7438	-0.0007438	41.82	-0.6334	-0.0006334	41.82	-0.6305	-0.0006305	41.82	-0.6073	-0.0006073	41.82	-0.5708	-0.0005708	41.82	-0.5761	-0.0005761		41.82	-0.7438	-0.0007438	41.82	-0.6636	-0.0006636	41.82	-0.6393	-0.0006393	41.82	-0.6392	-0.0006392	41.82	-0.63	-0.00063	41.82	-0.6286	-0.0006286		41.82	-0.7438	-0.0007438	41.82	-0.616	-0.000616	41.82	-0.6376	-0.0006376	41.82	-0.6132
	42.33	-0.7432	-0.0007432	42.33	-0.6335	-0.0006335	42.33	-0.6305	-0.0006305	42.33	-0.6074	-0.0006074	42.33	-0.571	-0.000571	42.33	-0.5764	-0.0005764		42.33	-0.7432	-0.0007432	42.33	-0.6636	-0.0006636	42.33	-0.6393	-0.0006393	42.33	-0.6392	-0.0006392	42.33	-0.6301	-0.0006301	42.33	-0.6286	-0.0006286		42.33	-0.7432	-0.0007432	42.33	-0.6161	-0.0006161	42.33	-0.6376	-0.0006376	42.33	-0.6133
	42.84	-0.7426	-0.0007426	42.84	-0.6336	-0.0006336	42.84	-0.6306	-0.0006306	42.84	-0.6074	-0.0006074	42.84	-0.5712	-0.0005712	42.84	-0.5766	-0.0005766		42.84	-0.7426	-0.0007426	42.84	-0.6636	-0.0006636	42.84	-0.6393	-0.0006393	42.84	-0.6392	-0.0006392	42.84	-0.6301	-0.0006301	42.84	-0.6286	-0.0006286		42.84	-0.7426	-0.0007426	42.84	-0.6161	-0.0006161	42.84	-0.6376	-0.0006376	42.84	-0.6133
	43.35	-0.7421	-0.0007421	43.35	-0.6337	-0.0006337	43.35	-0.6306	-0.0006306	43.35	-0.6075	-0.0006075	43.35	-0.5715	-0.0005715	43.35	-0.5768	-0.0005768		43.35	-0.7421	-0.0007421	43.35	-0.6636	-0.0006636	43.35	-0.6393	-0.0006393	43.35	-0.6392	-0.0006392	43.35	-0.6302	-0.0006302	43.35	-0.6286	-0.0006286		43.35	-0.7421	-0.0007421	43.35	-0.6161	-0.0006161	43.35	-0.6376	-0.0006376	43.35	-0.6134
	43.86	-0.7416	-0.0007416	43.86	-0.6338	-0.0006338	43.86	-0.6307	-0.0006307	43.86	-0.6075	-0.0006075	43.86	-0.5717	-0.0005717	43.86	-0.5771	-0.0005771		43.86	-0.7416	-0.0007416	43.86	-0.6635	-0.0006635	43.86	-0.6393	-0.0006393	43.86	-0.6392	-0.0006392	43.86	-0.6302	-0.0006302	43.86	-0.6286	-0.0006286		43.86	-0.7416	-0.0007416	43.86	-0.6161	-0.0006161	43.86	-0.6376	-0.0006376	43.86	-0.6135
	44.37	-0.7411	-0.0007411	44.37	-0.6339	-0.0006339	44.37	-0.6308	-0.0006308	44.37	-0.6075	-0.0006075	44.37	-0.5719	-0.0005719	44.37	-0.5772	-0.0005772		44.37	-0.7411	-0.0007411	44.37	-0.6635	-0.0006635	44.37	-0.6393	-0.0006393	44.37	-0.6392	-0.0006392	44.37	-0.6302	-0.0006302	44.37	-0.6286	-0.0006286		44.37	-0.7411	-0.0007411	44.37	-0.616	-0.000616	44.37	-0.6376	-0.0006376	44.37	-0.6136
	44.88	-0.7407	-0.0007407	44.88	-0.634	-0.000634	44.88	-0.6308	-0.0006308	44.88	-0.6075	-0.0006075	44.88	-0.5721	-0.0005721	44.88	-0.5774	-0.0005774		44.88	-0.7407	-0.0007407	44.88	-0.6635	-0.0006635	44.88	-0.6393	-0.0006393	44.88	-0.6392	-0.0006392	44.88	-0.6303	-0.0006303	44.88	-0.6286	-0.0006286		44.88	-0.7407	-0.0007407	44.88	-0.616	-0.000616	44.88	-0.6376	-0.0006376	44.88	-0.6137
	45.39	-0.7402	-0.0007402	45.39	-0.6341	-0.0006341	45.39	-0.6309	-0.0006309	45.39	-0.6076	-0.0006076	45.39	-0.5723	-0.0005723	45.39	-0.5776	-0.0005776		45.39	-0.7402	-0.0007402	45.39	-0.6635	-0.0006635	45.39	-0.6393	-0.0006393	45.39	-0.6392	-0.0006392	45.39	-0.6303	-0.0006303	45.39	-0.6286	-0.0006286		45.39	-0.7402	-0.0007402	45.39	-0.616	-0.000616	45.39	-0.6376	-0.0006376	45.39	-0.6138
	45.9	-0.7397	-0.0007397	45.9	-0.6342	-0.0006342	45.9	-0.6309	-0.0006309	45.9	-0.6076	-0.0006076	45.9	-0.5725	-0.0005725	45.9	-0.5777	-0.0005777		45.9	-0.7397	-0.0007397	45.9	-0.6635	-0.0006635	45.9	-0.6393	-0.0006393	45.9	-0.6392	-0.0006392	45.9	-0.6303	-0.0006303	45.9	-0.6286	-0.0006286		45.9	-0.7397	-0.0007397	45.9	-0.616	-0.000616	45.9	-0.6376	-0.0006376	45.9	-0.6138
	46.41	-0.7392	-0.0007392	46.41	-0.6343	-0.0006343	46.41	-0.631	-0.000631	46.41	-0.6076	-0.0006076	46.41	-0.5728	-0.0005728	46.41	-0.5778	-0.0005778		46.41	-0.7392	-0.0007392	46.41	-0.6635	-0.0006635	46.41	-0.6394	-0.0006394	46.41	-0.6392	-0.0006392	46.41	-0.6304	-0.0006304	46.41	-0.6286	-0.0006286		46.41	-0.7392	-0.0007392	46.41	-0.616	-0.000616	46.41	-0.6376	-0.0006376	46.41	-0.6139
	46.92	-0.7387	-0.0007387	46.92	-0.6344	-0.0006344	46.92	-0.631	-0.000631	46.92	-0.6076	-0.0006076	46.92	-0.573	-0.000573	46.92	-0.5779	-0.0005779		46.92	-0.7387	-0.0007387	46.92	-0.6634	-0.0006634	46.92	-0.6394	-0.0006394	46.92	-0.6391	-0.0006391	46.92	-0.6304	-0.0006304	46.92	-0.6286	-0.0006286		46.92	-0.7387	-0.0007387	46.92	-0.6161	-0.0006161	46.92	-0.6376	-0.0006376	46.92	-0.614
	47.43	-0.7382	-0.0007382	47.43	-0.6345	-0.0006345	47.43	-0.6311	-0.0006311	47.43	-0.6076	-0.0006076	47.43	-0.5732	-0.0005732	47.43	-0.578	-0.000578		47.43	-0.7382	-0.0007382	47.43	-0.6634	-0.0006634	47.43	-0.6394	-0.0006394	47.43	-0.6391	-0.0006391	47.43	-0.6304	-0.0006304	47.43	-0.6286	-0.0006286		47.43	-0.7382	-0.0007382	47.43	-0.6162	-0.0006162	47.43	-0.6376	-0.0006376	47.43	-0.6141
	47.94	-0.7378	-0.0007378	47.94	-0.6346	-0.0006346	47.94	-0.6311	-0.0006311	47.94	-0.6076	-0.0006076	47.94	-0.5735	-0.0005735	47.94	-0.5781	-0.0005781		47.94	-0.7378	-0.0007378	47.94	-0.6634	-0.0006634	47.94	-0.6394	-0.0006394	47.94	-0.6391	-0.0006391	47.94	-0.6304	-0.0006304	47.94	-0.6286	-0.0006286		47.94	-0.7378	-0.0007378	47.94	-0.6162	-0.0006162	47.94	-0.6376	-0.0006376	47.94	-0.6142
	48.45	-0.7374	-0.0007374	48.45	-0.6347	-0.0006347	48.45	-0.6312	-0.0006312	48.45	-0.6077	-0.0006077	48.45	-0.5737	-0.0005737	48.45	-0.5782	-0.0005782		48.45	-0.7374	-0.0007374	48.45	-0.6634	-0.0006634	48.45	-0.6394	-0.0006394	48.45	-0.6391	-0.0006391	48.45	-0.6305	-0.0006305	48.45	-0.6286	-0.0006286		48.45	-0.7374	-0.0007374	48.45	-0.6163	-0.0006163	48.45	-0.6376	-0.0006376	48.45	-0.6143
	48.96	-0.7369	-0.0007369	48.96	-0.6348	-0.0006348	48.96	-0.6312	-0.0006312	48.96	-0.6078	-0.0006078	48.96	-0.5739	-0.0005739	48.96	-0.5783	-0.0005783		48.96	-0.7369	-0.0007369	48.96	-0.6634	-0.0006634	48.96	-0.6394	-0.0006394	48.96	-0.6391	-0.0006391	48.96	-0.6305	-0.0006305	48.96	-0.6285	-0.0006285		48.96	-0.7369	-0.0007369	48.96	-0.6163	-0.0006163	48.96	-0.6376	-0.0006376	48.96	-0.6144
	49.47	-0.7366	-0.0007366	49.47	-0.6349	-0.0006349	49.47	-0.6313	-0.0006313	49.47	-0.6078	-0.0006078	49.47	-0.5742	-0.0005742	49.47	-0.5784	-0.0005784		49.47	-0.7366	-0.0007366	49.47	-0.6634	-0.0006634	49.47	-0.6394	-0.0006394	49.47	-0.6391	-0.0006391	49.47	-0.6305	-0.0006305	49.47	-0.6285	-0.0006285		49.47	-0.7366	-0.0007366	49.47	-0.6163	-0.0006163	49.47	-0.6376	-0.0006376	49.47	-0.6145
	49.98	-0.7361	-0.0007361	49.98	-0.635	-0.000635	49.98	-0.6313	-0.0006313	49.98	-0.6079	-0.0006079	49.98	-0.5744	-0.0005744	49.98	-0.5784	-0.0005784		49.98	-0.7361	-0.0007361	49.98	-0.6633	-0.0006633	49.98	-0.6394	-0.0006394	49.98	-0.6391	-0.0006391	49.98	-0.6305	-0.0006305	49.98	-0.6285	-0.0006285		49.98	-0.7361	-0.0007361	49.98	-0.6163	-0.0006163	49.98	-0.6376	-0.0006376	49.98	-0.6146
	50.49	-0.7357	-0.0007357	50.49	-0.6351	-0.0006351	50.49	-0.6314	-0.0006314	50.49	-0.6079	-0.0006079	50.49	-0.5746	-0.0005746	50.49	-0.5785	-0.0005785		50.49	-0.7357	-0.0007357	50.49	-0.6633	-0.0006633	50.49	-0.6394	-0.0006394	50.49	-0.6391	-0.0006391	50.49	-0.6306	-0.0006306	50.49	-0.6285	-0.0006285		50.49	-0.7357	-0.0007357	50.49	-0.6163	-0.0006163	50.49	-0.6376	-0.0006376	50.49	-0.6147
	51	-0.7353	-0.0007353	51	-0.6352	-0.0006352	51	-0.6314	-0.0006314	51	-0.6079	-0.0006079	51	-0.5749	-0.0005749	51	-0.5785	-0.0005785		51	-0.7353	-0.0007353	51	-0.6633	-0.0006633	51	-0.6394	-0.0006394	51	-0.6391	-0.0006391	51	-0.6306	-0.0006306	51	-0.6285	-0.0006285		51	-0.7353	-0.0007353	51	-0.6163	-0.0006163	51	-0.6376	-0.0006376	51	-0.6148
	51.51	-0.7348	-0.0007348	51.51	-0.6353	-0.0006353	51.51	-0.6315	-0.0006315	51.51	-0.608	-0.000608	51.51	-0.5751	-0.0005751	51.51	-0.5786	-0.0005786		51.51	-0.7348	-0.0007348	51.51	-0.6633	-0.0006633	51.51	-0.6394	-0.0006394	51.51	-0.6391	-0.0006391	51.51	-0.6306	-0.0006306	51.51	-0.6285	-0.0006285		51.51	-0.7348	-0.0007348	51.51	-0.6164	-0.0006164	51.51	-0.6376	-0.0006376	51.51	-0.6148
	52.02	-0.7345	-0.0007345	52.02	-0.6354	-0.0006354	52.02	-0.6315	-0.0006315	52.02	-0.6081	-0.0006081	52.02	-0.5753	-0.0005753	52.02	-0.5786	-0.0005786		52.02	-0.7345	-0.0007345	52.02	-0.6633	-0.0006633	52.02	-0.6394	-0.0006394	52.02	-0.6391	-0.0006391	52.02	-0.6306	-0.0006306	52.02	-0.6285	-0.0006285		52.02	-0.7345	-0.0007345	52.02	-0.6164	-0.0006164	52.02	-0.6377	-0.0006377	52.02	-0.6149
	52.53	-0.7341	-0.0007341	52.53	-0.6355	-0.0006355	52.53	-0.6316	-0.0006316	52.53	-0.6081	-0.0006081	52.53	-0.5755	-0.0005755	52.53	-0.5787	-0.0005787		52.53	-0.7341	-0.0007341	52.53	-0.6633	-0.0006633	52.53	-0.6394	-0.0006394	52.53	-0.6391	-0.0006391	52.53	-0.6307	-0.0006307	52.53	-0.6285	-0.0006285		52.53	-0.7341	-0.0007341	52.53	-0.6165	-0.0006165	52.53	-0.6376	-0.0006376	52.53	-0.615
	53.04	-0.7337	-0.0007337	53.04	-0.6356	-0.0006356	53.04	-0.6316	-0.0006316	53.04	-0.6081	-0.0006081	53.04	-0.5757	-0.0005757	53.04	-0.5787	-0.0005787		53.04	-0.7337	-0.0007337	53.04	-0.6632	-0.0006632	53.04	-0.6394	-0.0006394	53.04	-0.6391	-0.0006391	53.04	-0.6307	-0.0006307	53.04	-0.6286	-0.0006286		53.04	-0.7337	-0.0007337	53.04	-0.6165	-0.0006165	53.04	-0.6376	-0.0006376	53.04	-0.6151
	53.55	-0.7334	-0.0007334	53.55	-0.6357	-0.0006357	53.55	-0.6317	-0.0006317	53.55	-0.6081	-0.0006081	53.55	-0.576	-0.000576	53.55	-0.5787	-0.0005787		53.55	-0.7334	-0.0007334	53.55	-0.6632	-0.0006632	53.55	-0.6394	-0.0006394	53.55	-0.6391	-0.0006391	53.55	-0.6307	-0.0006307	53.55	-0.6286	-0.0006286		53.55	-0.7334	-0.0007334	53.55	-0.6165	-0.0006165	53.55	-0.6376	-0.0006376	53.55	-0.6152
	54.06	-0.733	-0.000733	54.06	-0.6358	-0.0006358	54.06	-0.6317	-0.0006317	54.06	-0.6081	-0.0006081	54.06	-0.5762	-0.0005762	54.06	-0.5788	-0.0005788		54.06	-0.733	-0.000733	54.06	-0.6632	-0.0006632	54.06	-0.6394	-0.0006394	54.06	-0.6391	-0.0006391	54.06	-0.6308	-0.0006308	54.06	-0.6286	-0.0006286		54.06	-0.733	-0.000733	54.06	-0.6165	-0.0006165	54.06	-0.6376	-0.0006376	54.06	-0.6153
	54.57	-0.7326	-0.0007326	54.57	-0.6359	-0.0006359	54.57	-0.6318	-0.0006318	54.57	-0.6082	-0.0006082	54.57	-0.5764	-0.0005764	54.57	-0.5788	-0.0005788		54.57	-0.7326	-0.0007326	54.57	-0.6632	-0.0006632	54.57	-0.6394	-0.0006394	54.57	-0.639	-0.000639	54.57	-0.6308	-0.0006308	54.57	-0.6286	-0.0006286		54.57	-0.7326	-0.0007326	54.57	-0.6165	-0.0006165	54.57	-0.6376	-0.0006376	54.57	-0.6154
	55.08	-0.7322	-0.0007322	55.08	-0.636	-0.000636	55.08	-0.6318	-0.0006318	55.08	-0.6083	-0.0006083	55.08	-0.5766	-0.0005766	55.08	-0.5788	-0.0005788		55.08	-0.7322	-0.0007322	55.08	-0.6632	-0.0006632	55.08	-0.6394	-0.0006394	55.08	-0.639	-0.000639	55.08	-0.6308	-0.0006308	55.08	-0.6286	-0.0006286		55.08	-0.7322	-0.0007322	55.08	-0.6165	-0.0006165	55.08	-0.6376	-0.0006376	55.08	-0.6155
	55.59	-0.7319	-0.0007319	55.59	-0.636	-0.000636	55.59	-0.6319	-0.0006319	55.59	-0.6084	-0.0006084	55.59	-0.5768	-0.0005768	55.59	-0.5788	-0.0005788		55.59	-0.7319	-0.0007319	55.59	-0.6632	-0.0006632	55.59	-0.6394	-0.0006394	55.59	-0.639	-0.000639	55.59	-0.6308	-0.0006308	55.59	-0.6286	-0.0006286		55.59	-0.7319	-0.0007319	55.59	-0.6165	-0.0006165	55.59	-0.6376	-0.0006376	55.59	-0.6156
	56.1	-0.7315	-0.0007315	56.1	-0.6361	-0.0006361	56.1	-0.6319	-0.0006319	56.1	-0.6084	-0.0006084	56.1	-0.577	-0.000577	56.1	-0.5789	-0.0005789		56.1	-0.7315	-0.0007315	56.1	-0.6631	-0.0006631	56.1	-0.6395	-0.0006395	56.1	-0.639	-0.000639	56.1	-0.6309	-0.0006309	56.1	-0.6286	-0.0006286		56.1	-0.7315	-0.0007315	56.1	-0.6166	-0.0006166	56.1	-0.6376	-0.0006376	56.1	-0.6157
	56.61	-0.7311	-0.0007311	56.61	-0.6362	-0.0006362	56.61	-0.632	-0.000632	56.61	-0.6084	-0.0006084	56.61	-0.5772	-0.0005772	56.61	-0.5789	-0.0005789		56.61	-0.7311	-0.0007311	56.61	-0.6631	-0.0006631	56.61	-0.6395	-0.0006395	56.61	-0.639	-0.000639	56.61	-0.6309	-0.0006309	56.61	-0.6286	-0.0006286		56.61	-0.7311	-0.0007311	56.61	-0.6166	-0.0006166	56.61	-0.6376	-0.0006376	56.61	-0.6157
	57.12	-0.7308	-0.0007308	57.12	-0.6363	-0.0006363	57.12	-0.632	-0.000632	57.12	-0.6084	-0.0006084	57.12	-0.5774	-0.0005774	57.12	-0.5789	-0.0005789		57.12	-0.7308	-0.0007308	57.12	-0.6631	-0.0006631	57.12	-0.6395	-0.0006395	57.12	-0.639	-0.000639	57.12	-0.6309	-0.0006309	57.12	-0.6286	-0.0006286		57.12	-0.7308	-0.0007308	57.12	-0.6166	-0.0006166	57.12	-0.6376	-0.0006376	57.12	-0.6158
	57.63	-0.7306	-0.0007306	57.63	-0.6364	-0.0006364	57.63	-0.6321	-0.0006321	57.63	-0.6084	-0.0006084	57.63	-0.5776	-0.0005776	57.63	-0.5789	-0.0005789		57.63	-0.7306	-0.0007306	57.63	-0.6631	-0.0006631	57.63	-0.6395	-0.0006395	57.63	-0.639	-0.000639	57.63	-0.6309	-0.0006309	57.63	-0.6286	-0.0006286		57.63	-0.7306	-0.0007306	57.63	-0.6166	-0.0006166	57.63	-0.6376	-0.0006376	57.63	-0.6159
	58.14	-0.7304	-0.0007304	58.14	-0.6365	-0.0006365	58.14	-0.6321	-0.0006321	58.14	-0.6083	-0.0006083	58.14	-0.5778	-0.0005778	58.14	-0.579	-0.000579		58.14	-0.7304	-0.0007304	58.14	-0.6631	-0.0006631	58.14	-0.6395	-0.0006395	58.14	-0.639	-0.000639	58.14	-0.631	-0.000631	58.14	-0.6285	-0.0006285		58.14	-0.7304	-0.0007304	58.14	-0.6167	-0.0006167	58.14	-0.6376	-0.0006376	58.14	-0.616
	58.65	-0.7302	-0.0007302	58.65	-0.6365	-0.0006365	58.65	-0.6322	-0.0006322	58.65	-0.6083	-0.0006083	58.65	-0.578	-0.000578	58.65	-0.579	-0.000579		58.65	-0.7302	-0.0007302	58.65	-0.6631	-0.0006631	58.65	-0.6395	-0.0006395	58.65	-0.639	-0.000639	58.65	-0.631	-0.000631	58.65	-0.6285	-0.0006285		58.65	-0.7302	-0.0007302	58.65	-0.6167	-0.0006167	58.65	-0.6376	-0.0006376	58.65	-0.6161
	59.16	-0.73	-0.00073	59.16	-0.6366	-0.0006366	59.16	-0.6322	-0.0006322	59.16	-0.6084	-0.0006084	59.16	-0.5782	-0.0005782	59.16	-0.579	-0.000579		59.16	-0.73	-0.00073	59.16	-0.663	-0.000663	59.16	-0.6395	-0.0006395	59.16	-0.639	-0.000639	59.16	-0.631	-0.000631	59.16	-0.6285	-0.0006285		59.16	-0.73	-0.00073	59.16	-0.6167	-0.0006167	59.16	-0.6376	-0.0006376	59.16	-0.6162
	59.67	-0.7297	-0.0007297	59.67	-0.6367	-0.0006367	59.67	-0.6323	-0.0006323	59.67	-0.6085	-0.0006085	59.67	-0.5784	-0.0005784	59.67	-0.579	-0.000579		59.67	-0.7297	-0.0007297	59.67	-0.663	-0.000663	59.67	-0.6395	-0.0006395	59.67	-0.639	-0.000639	59.67	-0.631	-0.000631	59.67	-0.6285	-0.0006285		59.67	-0.7297	-0.0007297	59.67	-0.6167	-0.0006167	59.67	-0.6376	-0.0006376	59.67	-0.6163
	60.18	-0.7295	-0.0007295	60.18	-0.6368	-0.0006368	60.18	-0.6323	-0.0006323	60.18	-0.6085	-0.0006085	60.18	-0.5786	-0.0005786	60.18	-0.579	-0.000579		60.18	-0.7295	-0.0007295	60.18	-0.663	-0.000663	60.18	-0.6395	-0.0006395	60.18	-0.639	-0.000639	60.18	-0.631	-0.000631	60.18	-0.6285	-0.0006285		60.18	-0.7295	-0.0007295	60.18	-0.6167	-0.0006167	60.18	-0.6376	-0.0006376	60.18	-0.6164
	60.69	-0.7292	-0.0007292	60.69	-0.6369	-0.0006369	60.69	-0.6323	-0.0006323	60.69	-0.6086	-0.0006086	60.69	-0.5788	-0.0005788	60.69	-0.579	-0.000579		60.69	-0.7292	-0.0007292	60.69	-0.663	-0.000663	60.69	-0.6395	-0.0006395	60.69	-0.639	-0.000639	60.69	-0.6311	-0.0006311	60.69	-0.6285	-0.0006285		60.69	-0.7292	-0.0007292	60.69	-0.6167	-0.0006167	60.69	-0.6376	-0.0006376	60.69	-0.6165
	61.2	-0.7289	-0.0007289	61.2	-0.637	-0.000637	61.2	-0.6324	-0.0006324	61.2	-0.6086	-0.0006086	61.2	-0.579	-0.000579	61.2	-0.579	-0.000579		61.2	-0.7289	-0.0007289	61.2	-0.663	-0.000663	61.2	-0.6395	-0.0006395	61.2	-0.639	-0.000639	61.2	-0.6311	-0.0006311	61.2	-0.6285	-0.0006285		61.2	-0.7289	-0.0007289	61.2	-0.6167	-0.0006167	61.2	-0.6376	-0.0006376	61.2	-0.6166
	61.71	-0.7287	-0.0007287	61.71	-0.6371	-0.0006371	61.71	-0.6324	-0.0006324	61.71	-0.6086	-0.0006086	61.71	-0.5792	-0.0005792	61.71	-0.579	-0.000579		61.71	-0.7287	-0.0007287	61.71	-0.663	-0.000663	61.71	-0.6396	-0.0006396	61.71	-0.639	-0.000639	61.71	-0.6311	-0.0006311	61.71	-0.6285	-0.0006285		61.71	-0.7287	-0.0007287	61.71	-0.6168	-0.0006168	61.71	-0.6376	-0.0006376	61.71	-0.6167
	62.22	-0.7284	-0.0007284	62.22	-0.6372	-0.0006372	62.22	-0.6325	-0.0006325	62.22	-0.6087	-0.0006087	62.22	-0.5794	-0.0005794	62.22	-0.579	-0.000579		62.22	-0.7284	-0.0007284	62.22	-0.663	-0.000663	62.22	-0.6396	-0.0006396	62.22	-0.639	-0.000639	62.22	-0.6311	-0.0006311	62.22	-0.6285	-0.0006285		62.22	-0.7284	-0.0007284	62.22	-0.6168	-0.0006168	62.22	-0.6376	-0.0006376	62.22	-0.6168
	62.73	-0.7282	-0.0007282	62.73	-0.6373	-0.0006373	62.73	-0.6325	-0.0006325	62.73	-0.6088	-0.0006088	62.73	-0.5796	-0.0005796	62.73	-0.579	-0.000579		62.73	-0.7282	-0.0007282	62.73	-0.6629	-0.0006629	62.73	-0.6396	-0.0006396	62.73	-0.639	-0.000639	62.73	-0.6311	-0.0006311	62.73	-0.6285	-0.0006285		62.73	-0.7282	-0.0007282	62.73	-0.6169	-0.0006169	62.73	-0.6376	-0.0006376	62.73	-0.6169
	63.24	-0.7279	-0.0007279	63.24	-0.6374	-0.0006374	63.24	-0.6326	-0.0006326	63.24	-0.6088	-0.0006088	63.24	-0.5798	-0.0005798	63.24	-0.579	-0.000579		63.24	-0.7279	-0.0007279	63.24	-0.6629	-0.0006629	63.24	-0.6396	-0.0006396	63.24	-0.639	-0.000639	63.24	-0.6312	-0.0006312	63.24	-0.6285	-0.0006285		63.24	-0.7279	-0.0007279	63.24	-0.6169	-0.0006169	63.24	-0.6376	-0.0006376	63.24	-0.617
	63.75	-0.7276	-0.0007276	63.75	-0.6374	-0.0006374	63.75	-0.6326	-0.0006326	63.75	-0.6089	-0.0006089	63.75	-0.5801	-0.0005801	63.75	-0.5791	-0.0005791		63.75	-0.7276	-0.0007276	63.75	-0.6629	-0.0006629	63.75	-0.6396	-0.0006396	63.75	-0.639	-0.000639	63.75	-0.6312	-0.0006312	63.75	-0.6285	-0.0006285		63.75	-0.7276	-0.0007276	63.75	-0.6169	-0.0006169	63.75	-0.6376	-0.0006376	63.75	-0.6171
	64.26	-0.7274	-0.0007274	64.26	-0.6375	-0.0006375	64.26	-0.6326	-0.0006326	64.26	-0.6089	-0.0006089	64.26	-0.5803	-0.0005803	64.26	-0.5791	-0.0005791		64.26	-0.7274	-0.0007274	64.26	-0.6629	-0.0006629	64.26	-0.6396	-0.0006396	64.26	-0.639	-0.000639	64.26	-0.6312	-0.0006312	64.26	-0.6285	-0.0006285		64.26	-0.7274	-0.0007274	64.26	-0.617	-0.000617	64.26	-0.6376	-0.0006376	64.26	-0.6172
	64.77	-0.7272	-0.0007272	64.77	-0.6376	-0.0006376	64.77	-0.6327	-0.0006327	64.77	-0.609	-0.000609	64.77	-0.5805	-0.0005805	64.77	-0.5791	-0.0005791		64.77	-0.7272	-0.0007272	64.77	-0.6629	-0.0006629	64.77	-0.6396	-0.0006396	64.77	-0.639	-0.000639	64.77	-0.6313	-0.0006313	64.77	-0.6285	-0.0006285		64.77	-0.7272	-0.0007272	64.77	-0.6171	-0.0006171	64.77	-0.6376	-0.0006376	64.77	-0.6173
	65.28	-0.7269	-0.0007269	65.28	-0.6376	-0.0006376	65.28	-0.6327	-0.0006327	65.28	-0.609	-0.000609	65.28	-0.5808	-0.0005808	65.28	-0.5791	-0.0005791		65.28	-0.7269	-0.0007269	65.28	-0.6629	-0.0006629	65.28	-0.6397	-0.0006397	65.28	-0.6389	-0.0006389	65.28	-0.6313	-0.0006313	65.28	-0.6285	-0.0006285		65.28	-0.7269	-0.0007269	65.28	-0.6171	-0.0006171	65.28	-0.6376	-0.0006376	65.28	-0.6174
	65.79	-0.7267	-0.0007267	65.79	-0.6377	-0.0006377	65.79	-0.6328	-0.0006328	65.79	-0.609	-0.000609	65.79	-0.581	-0.000581	65.79	-0.5791	-0.0005791		65.79	-0.7267	-0.0007267	65.79	-0.6628	-0.0006628	65.79	-0.6397	-0.0006397	65.79	-0.6389	-0.0006389	65.79	-0.6313	-0.0006313	65.79	-0.6285	-0.0006285		65.79	-0.7267	-0.0007267	65.79	-0.6172	-0.0006172	65.79	-0.6376	-0.0006376	65.79	-0.6175
	66.3	-0.7265	-0.0007265	66.3	-0.6378	-0.0006378	66.3	-0.6328	-0.0006328	66.3	-0.6091	-0.0006091	66.3	-0.5812	-0.0005812	66.3	-0.5791	-0.0005791		66.3	-0.7265	-0.0007265	66.3	-0.6628	-0.0006628	66.3	-0.6398	-0.0006398	66.3	-0.6389	-0.0006389	66.3	-0.6314	-0.0006314	66.3	-0.6285	-0.0006285		66.3	-0.7265	-0.0007265	66.3	-0.6173	-0.0006173	66.3	-0.6376	-0.0006376	66.3	-0.6176
	66.81	-0.7263	-0.0007263	66.81	-0.6379	-0.0006379	66.81	-0.6328	-0.0006328	66.81	-0.6091	-0.0006091	66.81	-0.5814	-0.0005814	66.81	-0.5791	-0.0005791		66.81	-0.7263	-0.0007263	66.81	-0.6628	-0.0006628	66.81	-0.6398	-0.0006398	66.81	-0.6389	-0.0006389	66.81	-0.6314	-0.0006314	66.81	-0.6285	-0.0006285		66.81	-0.7263	-0.0007263	66.81	-0.6174	-0.0006174	66.81	-0.6376	-0.0006376	66.81	-0.6177
	67.32	-0.726	-0.000726	67.32	-0.638	-0.000638	67.32	-0.6329	-0.0006329	67.32	-0.6091	-0.0006091	67.32	-0.5817	-0.0005817	67.32	-0.5792	-0.0005792		67.32	-0.726	-0.000726	67.32	-0.6628	-0.0006628	67.32	-0.6398	-0.0006398	67.32	-0.6389	-0.0006389	67.32	-0.6314	-0.0006314	67.32	-0.6285	-0.0006285		67.32	-0.726	-0.000726	67.32	-0.6174	-0.0006174	67.32	-0.6376	-0.0006376	67.32	-0.6178
	67.83	-0.7258	-0.0007258	67.83	-0.638	-0.000638	67.83	-0.6329	-0.0006329	67.83	-0.6091	-0.0006091	67.83	-0.5819	-0.0005819	67.83	-0.5792	-0.0005792		67.83	-0.7258	-0.0007258	67.83	-0.6628	-0.0006628	67.83	-0.6399	-0.0006399	67.83	-0.6389	-0.0006389	67.83	-0.6314	-0.0006314	67.83	-0.6285	-0.0006285		67.83	-0.7258	-0.0007258	67.83	-0.6174	-0.0006174	67.83	-0.6376	-0.0006376	67.83	-0.6179
	68.34	-0.7255	-0.0007255	68.34	-0.6381	-0.0006381	68.34	-0.633	-0.000633	68.34	-0.6091	-0.0006091	68.34	-0.5821	-0.0005821	68.34	-0.5792	-0.0005792		68.34	-0.7255	-0.0007255	68.34	-0.6628	-0.0006628	68.34	-0.6399	-0.0006399	68.34	-0.6389	-0.0006389	68.34	-0.6315	-0.0006315	68.34	-0.6285	-0.0006285		68.34	-0.7255	-0.0007255	68.34	-0.6175	-0.0006175	68.34	-0.6376	-0.0006376	68.34	-0.618
	68.85	-0.7253	-0.0007253	68.85	-0.6382	-0.0006382	68.85	-0.633	-0.000633	68.85	-0.6091	-0.0006091	68.85	-0.5823	-0.0005823	68.85	-0.5792	-0.0005792		68.85	-0.7253	-0.0007253	68.85	-0.6627	-0.0006627	68.85	-0.6399	-0.0006399	68.85	-0.6389	-0.0006389	68.85	-0.6315	-0.0006315	68.85	-0.6285	-0.0006285		68.85	-0.7253	-0.0007253	68.85	-0.6175	-0.0006175	68.85	-0.6376	-0.0006376	68.85	-0.618
	69.36	-0.7251	-0.0007251	69.36	-0.6383	-0.0006383	69.36	-0.633	-0.000633	69.36	-0.6091	-0.0006091	69.36	-0.5826	-0.0005826	69.36	-0.5792	-0.0005792		69.36	-0.7251	-0.0007251	69.36	-0.6627	-0.0006627	69.36	-0.6399	-0.0006399	69.36	-0.6389	-0.0006389	69.36	-0.6315	-0.0006315	69.36	-0.6285	-0.0006285		69.36	-0.7251	-0.0007251	69.36	-0.6176	-0.0006176	69.36	-0.6376	-0.0006376	69.36	-0.6181
	69.87	-0.7249	-0.0007249	69.87	-0.6384	-0.0006384	69.87	-0.6331	-0.0006331	69.87	-0.6091	-0.0006091	69.87	-0.5828	-0.0005828	69.87	-0.5792	-0.0005792		69.87	-0.7249	-0.0007249	69.87	-0.6627	-0.0006627	69.87	-0.6399	-0.0006399	69.87	-0.6389	-0.0006389	69.87	-0.6315	-0.0006315	69.87	-0.6285	-0.0006285		69.87	-0.7249	-0.0007249	69.87	-0.6177	-0.0006177	69.87	-0.6376	-0.0006376	69.87	-0.6182
	70.38	-0.7247	-0.0007247	70.38	-0.6384	-0.0006384	70.38	-0.6331	-0.0006331	70.38	-0.6092	-0.0006092	70.38	-0.5831	-0.0005831	70.38	-0.5793	-0.0005793		70.38	-0.7247	-0.0007247	70.38	-0.6627	-0.0006627	70.38	-0.6399	-0.0006399	70.38	-0.6389	-0.0006389	70.38	-0.6315	-0.0006315	70.38	-0.6285	-0.0006285		70.38	-0.7247	-0.0007247	70.38	-0.6178	-0.0006178	70.38	-0.6376	-0.0006376	70.38	-0.6183
	70.89	-0.7245	-0.0007245	70.89	-0.6385	-0.0006385	70.89	-0.6332	-0.0006332	70.89	-0.6092	-0.0006092	70.89	-0.5833	-0.0005833	70.89	-0.5793	-0.0005793		70.89	-0.7245	-0.0007245	70.89	-0.6627	-0.0006627	70.89	-0.64	-0.00064	70.89	-0.6389	-0.0006389	70.89	-0.6315	-0.0006315	70.89	-0.6285	-0.0006285		70.89	-0.7245	-0.0007245	70.89	-0.6179	-0.0006179	70.89	-0.6376	-0.0006376	70.89	-0.6184
	71.4	-0.7243	-0.0007243	71.4	-0.6386	-0.0006386	71.4	-0.6332	-0.0006332	71.4	-0.6093	-0.0006093	71.4	-0.5835	-0.0005835	71.4	-0.5793	-0.0005793		71.4	-0.7243	-0.0007243	71.4	-0.6627	-0.0006627	71.4	-0.64	-0.00064	71.4	-0.6389	-0.0006389	71.4	-0.6316	-0.0006316	71.4	-0.6285	-0.0006285		71.4	-0.7243	-0.0007243	71.4	-0.6179	-0.0006179	71.4	-0.6376	-0.0006376	71.4	-0.6185
	71.91	-0.724	-0.000724	71.91	-0.6387	-0.0006387	71.91	-0.6332	-0.0006332	71.91	-0.6093	-0.0006093	71.91	-0.5838	-0.0005838	71.91	-0.5793	-0.0005793		71.91	-0.724	-0.000724	71.91	-0.6626	-0.0006626	71.91	-0.64	-0.00064	71.91	-0.6389	-0.0006389	71.91	-0.6316	-0.0006316	71.91	-0.6285	-0.0006285		71.91	-0.724	-0.000724	71.91	-0.618	-0.000618	71.91	-0.6376	-0.0006376	71.91	-0.6186
	72.42	-0.7238	-0.0007238	72.42	-0.6387	-0.0006387	72.42	-0.6333	-0.0006333	72.42	-0.6093	-0.0006093	72.42	-0.584	-0.000584	72.42	-0.5793	-0.0005793		72.42	-0.7238	-0.0007238	72.42	-0.6626	-0.0006626	72.42	-0.64	-0.00064	72.42	-0.6389	-0.0006389	72.42	-0.6316	-0.0006316	72.42	-0.6285	-0.0006285		72.42	-0.7238	-0.0007238	72.42	-0.618	-0.000618	72.42	-0.6376	-0.0006376	72.42	-0.6187
	72.93	-0.7237	-0.0007237	72.93	-0.6388	-0.0006388	72.93	-0.6333	-0.0006333	72.93	-0.6093	-0.0006093	72.93	-0.5843	-0.0005843	72.93	-0.5793	-0.0005793		72.93	-0.7237	-0.0007237	72.93	-0.6626	-0.0006626	72.93	-0.64	-0.00064	72.93	-0.6389	-0.0006389	72.93	-0.6316	-0.0006316	72.93	-0.6285	-0.0006285		72.93	-0.7237	-0.0007237	72.93	-0.618	-0.000618	72.93	-0.6376	-0.0006376	72.93	-0.6188
	73.44	-0.7235	-0.0007235	73.44	-0.6389	-0.0006389	73.44	-0.6334	-0.0006334	73.44	-0.6094	-0.0006094	73.44	-0.5845	-0.0005845	73.44	-0.5793	-0.0005793		73.44	-0.7235	-0.0007235	73.44	-0.6626	-0.0006626	73.44	-0.64	-0.00064	73.44	-0.6389	-0.0006389	73.44	-0.6317	-0.0006317	73.44	-0.6285	-0.0006285		73.44	-0.7235	-0.0007235	73.44	-0.6181	-0.0006181	73.44	-0.6377	-0.0006377	73.44	-0.6189
	73.95	-0.7233	-0.0007233	73.95	-0.6389	-0.0006389	73.95	-0.6334	-0.0006334	73.95	-0.6094	-0.0006094	73.95	-0.5848	-0.0005848	73.95	-0.5794	-0.0005794		73.95	-0.7233	-0.0007233	73.95	-0.6626	-0.0006626	73.95	-0.64	-0.00064	73.95	-0.6389	-0.0006389	73.95	-0.6317	-0.0006317	73.95	-0.6285	-0.0006285		73.95	-0.7233	-0.0007233	73.95	-0.6181	-0.0006181	73.95	-0.6377	-0.0006377	73.95	-0.619
	74.46	-0.7232	-0.0007232	74.46	-0.639	-0.000639	74.46	-0.6334	-0.0006334	74.46	-0.6095	-0.0006095	74.46	-0.585	-0.000585	74.46	-0.5794	-0.0005794		74.46	-0.7232	-0.0007232	74.46	-0.6626	-0.0006626	74.46	-0.64	-0.00064	74.46	-0.6389	-0.0006389	74.46	-0.6317	-0.0006317	74.46	-0.6285	-0.0006285		74.46	-0.7232	-0.0007232	74.46	-0.6182	-0.0006182	74.46	-0.6377	-0.0006377	74.46	-0.6192
	74.97	-0.723	-0.000723	74.97	-0.639	-0.000639	74.97	-0.6335	-0.0006335	74.97	-0.6095	-0.0006095	74.97	-0.5853	-0.0005853	74.97	-0.5794	-0.0005794		74.97	-0.723	-0.000723	74.97	-0.6625	-0.0006625	74.97	-0.6401	-0.0006401	74.97	-0.6389	-0.0006389	74.97	-0.6317	-0.0006317	74.97	-0.6285	-0.0006285		74.97	-0.723	-0.000723	74.97	-0.6183	-0.0006183	74.97	-0.6377	-0.0006377	74.97	-0.6193
	75.48	-0.7229	-0.0007229	75.48	-0.6391	-0.0006391	75.48	-0.6335	-0.0006335	75.48	-0.6096	-0.0006096	75.48	-0.5856	-0.0005856	75.48	-0.5794	-0.0005794		75.48	-0.7229	-0.0007229	75.48	-0.6625	-0.0006625	75.48	-0.6401	-0.0006401	75.48	-0.6389	-0.0006389	75.48	-0.6317	-0.0006317	75.48	-0.6285	-0.0006285		75.48	-0.7229	-0.0007229	75.48	-0.6184	-0.0006184	75.48	-0.6377	-0.0006377	75.48	-0.6194
	75.99	-0.7227	-0.0007227	75.99	-0.6391	-0.0006391	75.99	-0.6335	-0.0006335	75.99	-0.6096	-0.0006096	75.99	-0.5858	-0.0005858	75.99	-0.5794	-0.0005794		75.99	-0.7227	-0.0007227	75.99	-0.6625	-0.0006625	75.99	-0.6401	-0.0006401	75.99	-0.6389	-0.0006389	75.99	-0.6318	-0.0006318	75.99	-0.6285	-0.0006285		75.99	-0.7227	-0.0007227	75.99	-0.6185	-0.0006185	75.99	-0.6377	-0.0006377	75.99	-0.6194
	76.5	-0.7226	-0.0007226	76.5	-0.6392	-0.0006392	76.5	-0.6336	-0.0006336	76.5	-0.6097	-0.0006097	76.5	-0.5861	-0.0005861	76.5	-0.5794	-0.0005794		76.5	-0.7226	-0.0007226	76.5	-0.6625	-0.0006625	76.5	-0.6401	-0.0006401	76.5	-0.6389	-0.0006389	76.5	-0.6318	-0.0006318	76.5	-0.6285	-0.0006285		76.5	-0.7226	-0.0007226	76.5	-0.6185	-0.0006185	76.5	-0.6377	-0.0006377	76.5	-0.6195
	77.01	-0.7224	-0.0007224	77.01	-0.6393	-0.0006393	77.01	-0.6336	-0.0006336	77.01	-0.6097	-0.0006097	77.01	-0.5863	-0.0005863	77.01	-0.5795	-0.0005795		77.01	-0.7224	-0.0007224	77.01	-0.6624	-0.0006624	77.01	-0.6401	-0.0006401	77.01	-0.6389	-0.0006389	77.01	-0.6318	-0.0006318	77.01	-0.6285	-0.0006285		77.01	-0.7224	-0.0007224	77.01	-0.6186	-0.0006186	77.01	-0.6377	-0.0006377	77.01	-0.6197
	77.52	-0.7223	-0.0007223	77.52	-0.6393	-0.0006393	77.52	-0.6336	-0.0006336	77.52	-0.6098	-0.0006098	77.52	-0.5866	-0.0005866	77.52	-0.5795	-0.0005795		77.52	-0.7223	-0.0007223	77.52	-0.6624	-0.0006624	77.52	-0.6401	-0.0006401	77.52	-0.6389	-0.0006389	77.52	-0.6318	-0.0006318	77.52	-0.6285	-0.0006285		77.52	-0.7223	-0.0007223	77.52	-0.6186	-0.0006186	77.52	-0.6377	-0.0006377	77.52	-0.6198
	78.03	-0.7222	-0.0007222	78.03	-0.6394	-0.0006394	78.03	-0.6337	-0.0006337	78.03	-0.6098	-0.0006098	78.03	-0.5868	-0.0005868	78.03	-0.5795	-0.0005795		78.03	-0.7222	-0.0007222	78.03	-0.6624	-0.0006624	78.03	-0.6401	-0.0006401	78.03	-0.6389	-0.0006389	78.03	-0.6318	-0.0006318	78.03	-0.6285	-0.0006285		78.03	-0.7222	-0.0007222	78.03	-0.6187	-0.0006187	78.03	-0.6377	-0.0006377	78.03	-0.6199
	78.54	-0.7221	-0.0007221	78.54	-0.6395	-0.0006395	78.54	-0.6337	-0.0006337	78.54	-0.6098	-0.0006098	78.54	-0.5871	-0.0005871	78.54	-0.5795	-0.0005795		78.54	-0.7221	-0.0007221	78.54	-0.6624	-0.0006624	78.54	-0.6401	-0.0006401	78.54	-0.6389	-0.0006389	78.54	-0.6318	-0.0006318	78.54	-0.6285	-0.0006285		78.54	-0.7221	-0.0007221	78.54	-0.6187	-0.0006187	78.54	-0.6377	-0.0006377	78.54	-0.62
	79.05	-0.7219	-0.0007219	79.05	-0.6395	-0.0006395	79.05	-0.6337	-0.0006337	79.05	-0.6098	-0.0006098	79.05	-0.5873	-0.0005873	79.05	-0.5795	-0.0005795		79.05	-0.7219	-0.0007219	79.05	-0.6624	-0.0006624	79.05	-0.6402	-0.0006402	79.05	-0.6389	-0.0006389	79.05	-0.6318	-0.0006318	79.05	-0.6285	-0.0006285		79.05	-0.7219	-0.0007219	79.05	-0.6188	-0.0006188	79.05	-0.6377	-0.0006377	79.05	-0.6201
	79.56	-0.7217	-0.0007217	79.56	-0.6396	-0.0006396	79.56	-0.6338	-0.0006338	79.56	-0.6098	-0.0006098	79.56	-0.5876	-0.0005876	79.56	-0.5796	-0.0005796		79.56	-0.7217	-0.0007217	79.56	-0.6624	-0.0006624	79.56	-0.6402	-0.0006402	79.56	-0.6389	-0.0006389	79.56	-0.6319	-0.0006319	79.56	-0.6285	-0.0006285		79.56	-0.7217	-0.0007217	79.56	-0.6188	-0.0006188	79.56	-0.6377	-0.0006377	79.56	-0.6202
	80.07	-0.7216	-0.0007216	80.07	-0.6397	-0.0006397	80.07	-0.6338	-0.0006338	80.07	-0.6099	-0.0006099	80.07	-0.5879	-0.0005879	80.07	-0.5796	-0.0005796		80.07	-0.7216	-0.0007216	80.07	-0.6623	-0.0006623	80.07	-0.6402	-0.0006402	80.07	-0.6389	-0.0006389	80.07	-0.6319	-0.0006319	80.07	-0.6285	-0.0006285		80.07	-0.7216	-0.0007216	80.07	-0.6189	-0.0006189	80.07	-0.6377	-0.0006377	80.07	-0.6204
	80.58	-0.7214	-0.0007214	80.58	-0.6397	-0.0006397	80.58	-0.6338	-0.0006338	80.58	-0.61	-0.00061	80.58	-0.5881	-0.0005881	80.58	-0.5796	-0.0005796		80.58	-0.7214	-0.0007214	80.58	-0.6623	-0.0006623	80.58	-0.6402	-0.0006402	80.58	-0.6389	-0.0006389	80.58	-0.6319	-0.0006319	80.58	-0.6285	-0.0006285		80.58	-0.7214	-0.0007214	80.58	-0.6189	-0.0006189	80.58	-0.6377	-0.0006377	80.58	-0.6205
	81.09	-0.7213	-0.0007213	81.09	-0.6398	-0.0006398	81.09	-0.6339	-0.0006339	81.09	-0.61	-0.00061	81.09	-0.5884	-0.0005884	81.09	-0.5796	-0.0005796		81.09	-0.7213	-0.0007213	81.09	-0.6623	-0.0006623	81.09	-0.6402	-0.0006402	81.09	-0.6389	-0.0006389	81.09	-0.6319	-0.0006319	81.09	-0.6285	-0.0006285		81.09	-0.7213	-0.0007213	81.09	-0.619	-0.000619	81.09	-0.6377	-0.0006377	81.09	-0.6206
	81.6	-0.7212	-0.0007212	81.6	-0.6399	-0.0006399	81.6	-0.6339	-0.0006339	81.6	-0.6101	-0.0006101	81.6	-0.5886	-0.0005886	81.6	-0.5797	-0.0005797		81.6	-0.7212	-0.0007212	81.6	-0.6623	-0.0006623	81.6	-0.6402	-0.0006402	81.6	-0.6389	-0.0006389	81.6	-0.6319	-0.0006319	81.6	-0.6285	-0.0006285		81.6	-0.7212	-0.0007212	81.6	-0.619	-0.000619	81.6	-0.6377	-0.0006377	81.6	-0.6207
	82.11	-0.721	-0.000721	82.11	-0.64	-0.00064	82.11	-0.6339	-0.0006339	82.11	-0.61	-0.00061	82.11	-0.5889	-0.0005889	82.11	-0.5797	-0.0005797		82.11	-0.721	-0.000721	82.11	-0.6623	-0.0006623	82.11	-0.6402	-0.0006402	82.11	-0.6389	-0.0006389	82.11	-0.6319	-0.0006319	82.11	-0.6285	-0.0006285		82.11	-0.721	-0.000721	82.11	-0.619	-0.000619	82.11	-0.6377	-0.0006377	82.11	-0.6209
	82.62	-0.7209	-0.0007209	82.62	-0.64	-0.00064	82.62	-0.634	-0.000634	82.62	-0.61	-0.00061	82.62	-0.5891	-0.0005891	82.62	-0.5797	-0.0005797		82.62	-0.7209	-0.0007209	82.62	-0.6623	-0.0006623	82.62	-0.6402	-0.0006402	82.62	-0.6388	-0.0006388	82.62	-0.6319	-0.0006319	82.62	-0.6285	-0.0006285		82.62	-0.7209	-0.0007209	82.62	-0.6191	-0.0006191	82.62	-0.6377	-0.0006377	82.62	-0.621
	83.13	-0.7208	-0.0007208	83.13	-0.6401	-0.0006401	83.13	-0.634	-0.000634	83.13	-0.61	-0.00061	83.13	-0.5893	-0.0005893	83.13	-0.5798	-0.0005798		83.13	-0.7208	-0.0007208	83.13	-0.6622	-0.0006622	83.13	-0.6402	-0.0006402	83.13	-0.6388	-0.0006388	83.13	-0.6319	-0.0006319	83.13	-0.6285	-0.0006285		83.13	-0.7208	-0.0007208	83.13	-0.6191	-0.0006191	83.13	-0.6377	-0.0006377	83.13	-0.6211
	83.64	-0.7206	-0.0007206	83.64	-0.6402	-0.0006402	83.64	-0.634	-0.000634	83.64	-0.61	-0.00061	83.64	-0.5896	-0.0005896	83.64	-0.5798	-0.0005798		83.64	-0.7206	-0.0007206	83.64	-0.6622	-0.0006622	83.64	-0.6403	-0.0006403	83.64	-0.6388	-0.0006388	83.64	-0.632	-0.000632	83.64	-0.6285	-0.0006285		83.64	-0.7206	-0.0007206	83.64	-0.6191	-0.0006191	83.64	-0.6377	-0.0006377	83.64	-0.6212
	84.15	-0.7204	-0.0007204	84.15	-0.6403	-0.0006403	84.15	-0.6341	-0.0006341	84.15	-0.6101	-0.0006101	84.15	-0.5898	-0.0005898	84.15	-0.5798	-0.0005798		84.15	-0.7204	-0.0007204	84.15	-0.6622	-0.0006622	84.15	-0.6403	-0.0006403	84.15	-0.6388	-0.0006388	84.15	-0.632	-0.000632	84.15	-0.6285	-0.0006285		84.15	-0.7204	-0.0007204	84.15	-0.6192	-0.0006192	84.15	-0.6377	-0.0006377	84.15	-0.6213
	84.66	-0.7203	-0.0007203	84.66	-0.6404	-0.0006404	84.66	-0.6341	-0.0006341	84.66	-0.6102	-0.0006102	84.66	-0.59	-0.00059	84.66	-0.5799	-0.0005799		84.66	-0.7203	-0.0007203	84.66	-0.6622	-0.0006622	84.66	-0.6403	-0.0006403	84.66	-0.6388	-0.0006388	84.66	-0.632	-0.000632	84.66	-0.6285	-0.0006285		84.66	-0.7203	-0.0007203	84.66	-0.6193	-0.0006193	84.66	-0.6377	-0.0006377	84.66	-0.6215
	85.17	-0.7201	-0.0007201	85.17	-0.6404	-0.0006404	85.17	-0.6341	-0.0006341	85.17	-0.6103	-0.0006103	85.17	-0.5903	-0.0005903	85.17	-0.5799	-0.0005799		85.17	-0.7201	-0.0007201	85.17	-0.6622	-0.0006622	85.17	-0.6403	-0.0006403	85.17	-0.6388	-0.0006388	85.17	-0.632	-0.000632	85.17	-0.6285	-0.0006285		85.17	-0.7201	-0.0007201	85.17	-0.6194	-0.0006194	85.17	-0.6377	-0.0006377	85.17	-0.6216
	85.68	-0.72	-0.00072	85.68	-0.6405	-0.0006405	85.68	-0.6342	-0.0006342	85.68	-0.6103	-0.0006103	85.68	-0.5905	-0.0005905	85.68	-0.5799	-0.0005799		85.68	-0.72	-0.00072	85.68	-0.6622	-0.0006622	85.68	-0.6403	-0.0006403	85.68	-0.6388	-0.0006388	85.68	-0.6321	-0.0006321	85.68	-0.6285	-0.0006285		85.68	-0.72	-0.00072	85.68	-0.6194	-0.0006194	85.68	-0.6377	-0.0006377	85.68	-0.6218
	86.19	-0.7199	-0.0007199	86.19	-0.6405	-0.0006405	86.19	-0.6342	-0.0006342	86.19	-0.6104	-0.0006104	86.19	-0.5907	-0.0005907	86.19	-0.58	-0.00058		86.19	-0.7199	-0.0007199	86.19	-0.6621	-0.0006621	86.19	-0.6403	-0.0006403	86.19	-0.6388	-0.0006388	86.19	-0.6321	-0.0006321	86.19	-0.6285	-0.0006285		86.19	-0.7199	-0.0007199	86.19	-0.6194	-0.0006194	86.19	-0.6377	-0.0006377	86.19	-0.6219
	86.7	-0.7198	-0.0007198	86.7	-0.6406	-0.0006406	86.7	-0.6342	-0.0006342	86.7	-0.6104	-0.0006104	86.7	-0.5909	-0.0005909	86.7	-0.58	-0.00058		86.7	-0.7198	-0.0007198	86.7	-0.6621	-0.0006621	86.7	-0.6403	-0.0006403	86.7	-0.6388	-0.0006388	86.7	-0.6321	-0.0006321	86.7	-0.6285	-0.0006285		86.7	-0.7198	-0.0007198	86.7	-0.6194	-0.0006194	86.7	-0.6377	-0.0006377	86.7	-0.622
	87.21	-0.7196	-0.0007196	87.21	-0.6407	-0.0006407	87.21	-0.6343	-0.0006343	87.21	-0.6104	-0.0006104	87.21	-0.5911	-0.0005911	87.21	-0.5801	-0.0005801		87.21	-0.7196	-0.0007196	87.21	-0.6621	-0.0006621	87.21	-0.6403	-0.0006403	87.21	-0.6388	-0.0006388	87.21	-0.6321	-0.0006321	87.21	-0.6285	-0.0006285		87.21	-0.7196	-0.0007196	87.21	-0.6195	-0.0006195	87.21	-0.6377	-0.0006377	87.21	-0.6222
	87.72	-0.7195	-0.0007195	87.72	-0.6407	-0.0006407	87.72	-0.6343	-0.0006343	87.72	-0.6104	-0.0006104	87.72	-0.5914	-0.0005914	87.72	-0.5801	-0.0005801		87.72	-0.7195	-0.0007195	87.72	-0.6621	-0.0006621	87.72	-0.6404	-0.0006404	87.72	-0.6388	-0.0006388	87.72	-0.6321	-0.0006321	87.72	-0.6285	-0.0006285		87.72	-0.7195	-0.0007195	87.72	-0.6196	-0.0006196	87.72	-0.6377	-0.0006377	87.72	-0.6223
	88.23	-0.7194	-0.0007194	88.23	-0.6408	-0.0006408	88.23	-0.6343	-0.0006343	88.23	-0.6104	-0.0006104	88.23	-0.5916	-0.0005916	88.23	-0.5801	-0.0005801		88.23	-0.7194	-0.0007194	88.23	-0.6621	-0.0006621	88.23	-0.6404	-0.0006404	88.23	-0.6388	-0.0006388	88.23	-0.6321	-0.0006321	88.23	-0.6285	-0.0006285		88.23	-0.7194	-0.0007194	88.23	-0.6197	-0.0006197	88.23	-0.6377	-0.0006377	88.23	-0.6225
	88.74	-0.7193	-0.0007193	88.74	-0.6408	-0.0006408	88.74	-0.6343	-0.0006343	88.74	-0.6104	-0.0006104	88.74	-0.5918	-0.0005918	88.74	-0.5802	-0.0005802		88.74	-0.7193	-0.0007193	88.74	-0.6621	-0.0006621	88.74	-0.6404	-0.0006404	88.74	-0.6388	-0.0006388	88.74	-0.6321	-0.0006321	88.74	-0.6285	-0.0006285		88.74	-0.7193	-0.0007193	88.74	-0.6198	-0.0006198	88.74	-0.6377	-0.0006377	88.74	-0.6227
	89.25	-0.7192	-0.0007192	89.25	-0.6409	-0.0006409	89.25	-0.6344	-0.0006344	89.25	-0.6104	-0.0006104	89.25	-0.592	-0.000592	89.25	-0.5802	-0.0005802		89.25	-0.7192	-0.0007192	89.25	-0.6621	-0.0006621	89.25	-0.6404	-0.0006404	89.25	-0.6388	-0.0006388	89.25	-0.6322	-0.0006322	89.25	-0.6285	-0.0006285		89.25	-0.7192	-0.0007192	89.25	-0.6199	-0.0006199	89.25	-0.6377	-0.0006377	89.25	-0.6229
	89.76	-0.7192	-0.0007192	89.76	-0.641	-0.000641	89.76	-0.6344	-0.0006344	89.76	-0.6104	-0.0006104	89.76	-0.5922	-0.0005922	89.76	-0.5802	-0.0005802		89.76	-0.7192	-0.0007192	89.76	-0.6621	-0.0006621	89.76	-0.6404	-0.0006404	89.76	-0.6388	-0.0006388	89.76	-0.6322	-0.0006322	89.76	-0.6284	-0.0006284		89.76	-0.7192	-0.0007192	89.76	-0.62	-0.00062	89.76	-0.6377	-0.0006377	89.76	-0.6231
	90.27	-0.7191	-0.0007191	90.27	-0.641	-0.000641	90.27	-0.6344	-0.0006344	90.27	-0.6104	-0.0006104	90.27	-0.5924	-0.0005924	90.27	-0.5803	-0.0005803		90.27	-0.7191	-0.0007191	90.27	-0.6621	-0.0006621	90.27	-0.6404	-0.0006404	90.27	-0.6388	-0.0006388	90.27	-0.6322	-0.0006322	90.27	-0.6284	-0.0006284		90.27	-0.7191	-0.0007191	90.27	-0.62	-0.00062	90.27	-0.6377	-0.0006377	90.27	-0.6233
	90.78	-0.719	-0.000719	90.78	-0.6411	-0.0006411	90.78	-0.6344	-0.0006344	90.78	-0.6104	-0.0006104	90.78	-0.5926	-0.0005926	90.78	-0.5803	-0.0005803		90.78	-0.719	-0.000719	90.78	-0.6621	-0.0006621	90.78	-0.6404	-0.0006404	90.78	-0.6388	-0.0006388	90.78	-0.6322	-0.0006322	90.78	-0.6284	-0.0006284		90.78	-0.719	-0.000719	90.78	-0.6201	-0.0006201	90.78	-0.6377	-0.0006377	90.78	-0.6235
	91.29	-0.7189	-0.0007189	91.29	-0.6412	-0.0006412	91.29	-0.6345	-0.0006345	91.29	-0.6104	-0.0006104	91.29	-0.5927	-0.0005927	91.29	-0.5804	-0.0005804		91.29	-0.7189	-0.0007189	91.29	-0.6621	-0.0006621	91.29	-0.6405	-0.0006405	91.29	-0.6388	-0.0006388	91.29	-0.6322	-0.0006322	91.29	-0.6284	-0.0006284		91.29	-0.7189	-0.0007189	91.29	-0.6201	-0.0006201	91.29	-0.6377	-0.0006377	91.29	-0.6237
	91.8	-0.7189	-0.0007189	91.8	-0.6412	-0.0006412	91.8	-0.6345	-0.0006345	91.8	-0.6104	-0.0006104	91.8	-0.5929	-0.0005929	91.8	-0.5804	-0.0005804		91.8	-0.7189	-0.0007189	91.8	-0.6621	-0.0006621	91.8	-0.6405	-0.0006405	91.8	-0.6388	-0.0006388	91.8	-0.6322	-0.0006322	91.8	-0.6284	-0.0006284		91.8	-0.7189	-0.0007189	91.8	-0.6202	-0.0006202	91.8	-0.6377	-0.0006377	91.8	-0.6239
	92.31	-0.7188	-0.0007188	92.31	-0.6413	-0.0006413	92.31	-0.6345	-0.0006345	92.31	-0.6105	-0.0006105	92.31	-0.5931	-0.0005931	92.31	-0.5805	-0.0005805		92.31	-0.7188	-0.0007188	92.31	-0.662	-0.000662	92.31	-0.6405	-0.0006405	92.31	-0.6388	-0.0006388	92.31	-0.6322	-0.0006322	92.31	-0.6284	-0.0006284		92.31	-0.7188	-0.0007188	92.31	-0.6202	-0.0006202	92.31	-0.6377	-0.0006377	92.31	-0.624
	92.82	-0.7187	-0.0007187	92.82	-0.6413	-0.0006413	92.82	-0.6346	-0.0006346	92.82	-0.6105	-0.0006105	92.82	-0.5933	-0.0005933	92.82	-0.5806	-0.0005806		92.82	-0.7187	-0.0007187	92.82	-0.662	-0.000662	92.82	-0.6405	-0.0006405	92.82	-0.6388	-0.0006388	92.82	-0.6322	-0.0006322	92.82	-0.6284	-0.0006284		92.82	-0.7187	-0.0007187	92.82	-0.6203	-0.0006203	92.82	-0.6377	-0.0006377	92.82	-0.6242
	93.33	-0.7186	-0.0007186	93.33	-0.6414	-0.0006414	93.33	-0.6346	-0.0006346	93.33	-0.6106	-0.0006106	93.33	-0.5935	-0.0005935	93.33	-0.5806	-0.0005806		93.33	-0.7186	-0.0007186	93.33	-0.662	-0.000662	93.33	-0.6405	-0.0006405	93.33	-0.6388	-0.0006388	93.33	-0.6322	-0.0006322	93.33	-0.6284	-0.0006284		93.33	-0.7186	-0.0007186	93.33	-0.6204	-0.0006204	93.33	-0.6377	-0.0006377	93.33	-0.6244
	93.84	-0.7186	-0.0007186	93.84	-0.6414	-0.0006414	93.84	-0.6346	-0.0006346	93.84	-0.6106	-0.0006106	93.84	-0.5936	-0.0005936	93.84	-0.5807	-0.0005807		93.84	-0.7186	-0.0007186	93.84	-0.662	-0.000662	93.84	-0.6405	-0.0006405	93.84	-0.6388	-0.0006388	93.84	-0.6323	-0.0006323	93.84	-0.6284	-0.0006284		93.84	-0.7186	-0.0007186	93.84	-0.6204	-0.0006204	93.84	-0.6377	-0.0006377	93.84	-0.6245
	94.35	-0.7185	-0.0007185	94.35	-0.6415	-0.0006415	94.35	-0.6346	-0.0006346	94.35	-0.6106	-0.0006106	94.35	-0.5938	-0.0005938	94.35	-0.5807	-0.0005807		94.35	-0.7185	-0.0007185	94.35	-0.662	-0.000662	94.35	-0.6405	-0.0006405	94.35	-0.6388	-0.0006388	94.35	-0.6323	-0.0006323	94.35	-0.6284	-0.0006284		94.35	-0.7185	-0.0007185	94.35	-0.6205	-0.0006205	94.35	-0.6377	-0.0006377	94.35	-0.6247
	94.86	-0.7185	-0.0007185	94.86	-0.6415	-0.0006415	94.86	-0.6347	-0.0006347	94.86	-0.6106	-0.0006106	94.86	-0.594	-0.000594	94.86	-0.5808	-0.0005808		94.86	-0.7185	-0.0007185	94.86	-0.662	-0.000662	94.86	-0.6406	-0.0006406	94.86	-0.6388	-0.0006388	94.86	-0.6323	-0.0006323	94.86	-0.6284	-0.0006284		94.86	-0.7185	-0.0007185	94.86	-0.6205	-0.0006205	94.86	-0.6377	-0.0006377	94.86	-0.6249
	95.37	-0.7184	-0.0007184	95.37	-0.6415	-0.0006415	95.37	-0.6347	-0.0006347	95.37	-0.6106	-0.0006106	95.37	-0.5941	-0.0005941	95.37	-0.5808	-0.0005808		95.37	-0.7184	-0.0007184	95.37	-0.6619	-0.0006619	95.37	-0.6406	-0.0006406	95.37	-0.6387	-0.0006387	95.37	-0.6323	-0.0006323	95.37	-0.6284	-0.0006284		95.37	-0.7184	-0.0007184	95.37	-0.6206	-0.0006206	95.37	-0.6377	-0.0006377	95.37	-0.6251
	95.88	-0.7184	-0.0007184	95.88	-0.6416	-0.0006416	95.88	-0.6347	-0.0006347	95.88	-0.6106	-0.0006106	95.88	-0.5943	-0.0005943	95.88	-0.5809	-0.0005809		95.88	-0.7184	-0.0007184	95.88	-0.6619	-0.0006619	95.88	-0.6406	-0.0006406	95.88	-0.6387	-0.0006387	95.88	-0.6323	-0.0006323	95.88	-0.6284	-0.0006284		95.88	-0.7184	-0.0007184	95.88	-0.6206	-0.0006206	95.88	-0.6377	-0.0006377	95.88	-0.6254
	96.39	-0.7183	-0.0007183	96.39	-0.6416	-0.0006416	96.39	-0.6347	-0.0006347	96.39	-0.6106	-0.0006106	96.39	-0.5944	-0.0005944	96.39	-0.5809	-0.0005809		96.39	-0.7183	-0.0007183	96.39	-0.6619	-0.0006619	96.39	-0.6406	-0.0006406	96.39	-0.6387	-0.0006387	96.39	-0.6323	-0.0006323	96.39	-0.6285	-0.0006285		96.39	-0.7183	-0.0007183	96.39	-0.6206	-0.0006206	96.39	-0.6377	-0.0006377	96.39	-0.6256
	96.9	-0.7182	-0.0007182	96.9	-0.6417	-0.0006417	96.9	-0.6348	-0.0006348	96.9	-0.6106	-0.0006106	96.9	-0.5946	-0.0005946	96.9	-0.581	-0.000581		96.9	-0.7182	-0.0007182	96.9	-0.6619	-0.0006619	96.9	-0.6406	-0.0006406	96.9	-0.6387	-0.0006387	96.9	-0.6323	-0.0006323	96.9	-0.6285	-0.0006285		96.9	-0.7182	-0.0007182	96.9	-0.6206	-0.0006206	96.9	-0.6377	-0.0006377	96.9	-0.6258
	97.41	-0.7181	-0.0007181	97.41	-0.6417	-0.0006417	97.41	-0.6348	-0.0006348	97.41	-0.6106	-0.0006106	97.41	-0.5947	-0.0005947	97.41	-0.581	-0.000581		97.41	-0.7181	-0.0007181	97.41	-0.6619	-0.0006619	97.41	-0.6406	-0.0006406	97.41	-0.6387	-0.0006387	97.41	-0.6323	-0.0006323	97.41	-0.6285	-0.0006285		97.41	-0.7181	-0.0007181	97.41	-0.6206	-0.0006206	97.41	-0.6377	-0.0006377	97.41	-0.6259
	97.92	-0.7181	-0.0007181	97.92	-0.6417	-0.0006417	97.92	-0.6348	-0.0006348	97.92	-0.6106	-0.0006106	97.92	-0.5949	-0.0005949	97.92	-0.5811	-0.0005811		97.92	-0.7181	-0.0007181	97.92	-0.6619	-0.0006619	97.92	-0.6406	-0.0006406	97.92	-0.6387	-0.0006387	97.92	-0.6323	-0.0006323	97.92	-0.6285	-0.0006285		97.92	-0.7181	-0.0007181	97.92	-0.6207	-0.0006207	97.92	-0.6377	-0.0006377	97.92	-0.6261
	98.43	-0.718	-0.000718	98.43	-0.6418	-0.0006418	98.43	-0.6348	-0.0006348	98.43	-0.6106	-0.0006106	98.43	-0.595	-0.000595	98.43	-0.5811	-0.0005811		98.43	-0.718	-0.000718	98.43	-0.6618	-0.0006618	98.43	-0.6406	-0.0006406	98.43	-0.6387	-0.0006387	98.43	-0.6323	-0.0006323	98.43	-0.6285	-0.0006285		98.43	-0.718	-0.000718	98.43	-0.6208	-0.0006208	98.43	-0.6377	-0.0006377	98.43	-0.6263
	98.94	-0.718	-0.000718	98.94	-0.6418	-0.0006418	98.94	-0.6349	-0.0006349	98.94	-0.6106	-0.0006106	98.94	-0.5952	-0.0005952	98.94	-0.5812	-0.0005812		98.94	-0.718	-0.000718	98.94	-0.6618	-0.0006618	98.94	-0.6406	-0.0006406	98.94	-0.6387	-0.0006387	98.94	-0.6323	-0.0006323	98.94	-0.6285	-0.0006285		98.94	-0.718	-0.000718	98.94	-0.6208	-0.0006208	98.94	-0.6377	-0.0006377	98.94	-0.6264
	99.45	-0.7179	-0.0007179	99.45	-0.6419	-0.0006419	99.45	-0.6349	-0.0006349	99.45	-0.6106	-0.0006106	99.45	-0.5953	-0.0005953	99.45	-0.5813	-0.0005813		99.45	-0.7179	-0.0007179	99.45	-0.6618	-0.0006618	99.45	-0.6407	-0.0006407	99.45	-0.6387	-0.0006387	99.45	-0.6323	-0.0006323	99.45	-0.6285	-0.0006285		99.45	-0.7179	-0.0007179	99.45	-0.6209	-0.0006209	99.45	-0.6377	-0.0006377	99.45	-0.6266
	99.96	-0.7179	-0.0007179	99.96	-0.6419	-0.0006419	99.96	-0.6349	-0.0006349	99.96	-0.6106	-0.0006106	99.96	-0.5955	-0.0005955	99.96	-0.5813	-0.0005813		99.96	-0.7179	-0.0007179	99.96	-0.6618	-0.0006618	99.96	-0.6407	-0.0006407	99.96	-0.6387	-0.0006387	99.96	-0.6323	-0.0006323	99.96	-0.6285	-0.0006285		99.96	-0.7179	-0.0007179	99.96	-0.6209	-0.0006209	99.96	-0.6377	-0.0006377	99.96	-0.6268
	100.5	-0.7178	-0.0007178	100.5	-0.6419	-0.0006419	100.5	-0.6349	-0.0006349	100.5	-0.6106	-0.0006106	100.5	-0.5956	-0.0005956	100.5	-0.5814	-0.0005814		100.5	-0.7178	-0.0007178	100.5	-0.6618	-0.0006618	100.5	-0.6407	-0.0006407	100.5	-0.6387	-0.0006387	100.5	-0.6323	-0.0006323	100.5	-0.6285	-0.0006285		100.5	-0.7178	-0.0007178	100.5	-0.621	-0.000621	100.5	-0.6377	-0.0006377	100.5	-0.6269
	101	-0.7177	-0.0007177	101	-0.642	-0.000642	101	-0.635	-0.000635	101	-0.6106	-0.0006106	101	-0.5958	-0.0005958	101	-0.5814	-0.0005814		101	-0.7177	-0.0007177	101	-0.6618	-0.0006618	101	-0.6407	-0.0006407	101	-0.6387	-0.0006387	101	-0.6323	-0.0006323	101	-0.6285	-0.0006285		101	-0.7177	-0.0007177	101	-0.621	-0.000621	101	-0.6377	-0.0006377	101	-0.6271
	101.5	-0.7177	-0.0007177	101.5	-0.642	-0.000642	101.5	-0.635	-0.000635	101.5	-0.6106	-0.0006106	101.5	-0.5959	-0.0005959	101.5	-0.5815	-0.0005815		101.5	-0.7177	-0.0007177	101.5	-0.6618	-0.0006618	101.5	-0.6407	-0.0006407	101.5	-0.6387	-0.0006387	101.5	-0.6324	-0.0006324	101.5	-0.6285	-0.0006285		101.5	-0.7177	-0.0007177	101.5	-0.6211	-0.0006211	101.5	-0.6378	-0.0006378	101.5	-0.6272
	102	-0.7176	-0.0007176	102	-0.642	-0.000642	102	-0.635	-0.000635	102	-0.6106	-0.0006106	102	-0.5961	-0.0005961	102	-0.5815	-0.0005815		102	-0.7176	-0.0007176	102	-0.6617	-0.0006617	102	-0.6407	-0.0006407	102	-0.6387	-0.0006387	102	-0.6324	-0.0006324	102	-0.6285	-0.0006285		102	-0.7176	-0.0007176	102	-0.6211	-0.0006211	102	-0.6378	-0.0006378	102	-0.6274
	102.5	-0.7176	-0.0007176	102.5	-0.6421	-0.0006421	102.5	-0.635	-0.000635	102.5	-0.6107	-0.0006107	102.5	-0.5962	-0.0005962	102.5	-0.5816	-0.0005816		102.5	-0.7176	-0.0007176	102.5	-0.6617	-0.0006617	102.5	-0.6407	-0.0006407	102.5	-0.6387	-0.0006387	102.5	-0.6324	-0.0006324	102.5	-0.6285	-0.0006285		102.5	-0.7176	-0.0007176	102.5	-0.6212	-0.0006212	102.5	-0.6378	-0.0006378	102.5	-0.6276
	103	-0.7175	-0.0007175	103	-0.6421	-0.0006421	103	-0.6351	-0.0006351	103	-0.6107	-0.0006107	103	-0.5963	-0.0005963	103	-0.5816	-0.0005816		103	-0.7175	-0.0007175	103	-0.6617	-0.0006617	103	-0.6407	-0.0006407	103	-0.6387	-0.0006387	103	-0.6324	-0.0006324	103	-0.6285	-0.0006285		103	-0.7175	-0.0007175	103	-0.6212	-0.0006212	103	-0.6378	-0.0006378	103	-0.6277
	103.5	-0.7174	-0.0007174	103.5	-0.6421	-0.0006421	103.5	-0.6351	-0.0006351	103.5	-0.6107	-0.0006107	103.5	-0.5965	-0.0005965	103.5	-0.5817	-0.0005817		103.5	-0.7174	-0.0007174	103.5	-0.6617	-0.0006617	103.5	-0.6408	-0.0006408	103.5	-0.6387	-0.0006387	103.5	-0.6324	-0.0006324	103.5	-0.6285	-0.0006285		103.5	-0.7174	-0.0007174	103.5	-0.6212	-0.0006212	103.5	-0.6378	-0.0006378	103.5	-0.6279
	104	-0.7174	-0.0007174	104	-0.6422	-0.0006422	104	-0.6351	-0.0006351	104	-0.6107	-0.0006107	104	-0.5966	-0.0005966	104	-0.5817	-0.0005817		104	-0.7174	-0.0007174	104	-0.6617	-0.0006617	104	-0.6408	-0.0006408	104	-0.6386	-0.0006386	104	-0.6325	-0.0006325	104	-0.6285	-0.0006285		104	-0.7174	-0.0007174	104	-0.6212	-0.0006212	104	-0.6378	-0.0006378	104	-0.628
	104.6	-0.7174	-0.0007174	104.6	-0.6422	-0.0006422	104.6	-0.6351	-0.0006351	104.6	-0.6107	-0.0006107	104.6	-0.5968	-0.0005968	104.6	-0.5818	-0.0005818		104.6	-0.7174	-0.0007174	104.6	-0.6616	-0.0006616	104.6	-0.6408	-0.0006408	104.6	-0.6386	-0.0006386	104.6	-0.6325	-0.0006325	104.6	-0.6285	-0.0006285		104.6	-0.7174	-0.0007174	104.6	-0.6213	-0.0006213	104.6	-0.6378	-0.0006378	104.6	-0.6282
	105.1	-0.7173	-0.0007173	105.1	-0.6422	-0.0006422	105.1	-0.6351	-0.0006351	105.1	-0.6108	-0.0006108	105.1	-0.5969	-0.0005969	105.1	-0.5819	-0.0005819		105.1	-0.7173	-0.0007173	105.1	-0.6616	-0.0006616	105.1	-0.6408	-0.0006408	105.1	-0.6386	-0.0006386	105.1	-0.6325	-0.0006325	105.1	-0.6285	-0.0006285		105.1	-0.7173	-0.0007173	105.1	-0.6213	-0.0006213	105.1	-0.6378	-0.0006378	105.1	-0.6284
	105.6	-0.7173	-0.0007173	105.6	-0.6423	-0.0006423	105.6	-0.6352	-0.0006352	105.6	-0.6108	-0.0006108	105.6	-0.597	-0.000597	105.6	-0.5819	-0.0005819		105.6	-0.7173	-0.0007173	105.6	-0.6616	-0.0006616	105.6	-0.6408	-0.0006408	105.6	-0.6386	-0.0006386	105.6	-0.6325	-0.0006325	105.6	-0.6285	-0.0006285		105.6	-0.7173	-0.0007173	105.6	-0.6213	-0.0006213	105.6	-0.6378	-0.0006378	105.6	-0.6285
	106.1	-0.7173	-0.0007173	106.1	-0.6423	-0.0006423	106.1	-0.6352	-0.0006352	106.1	-0.6108	-0.0006108	106.1	-0.5971	-0.0005971	106.1	-0.582	-0.000582		106.1	-0.7173	-0.0007173	106.1	-0.6616	-0.0006616	106.1	-0.6408	-0.0006408	106.1	-0.6386	-0.0006386	106.1	-0.6325	-0.0006325	106.1	-0.6285	-0.0006285		106.1	-0.7173	-0.0007173	106.1	-0.6213	-0.0006213	106.1	-0.6378	-0.0006378	106.1	-0.6287
	106.6	-0.7172	-0.0007172	106.6	-0.6423	-0.0006423	106.6	-0.6352	-0.0006352	106.6	-0.6108	-0.0006108	106.6	-0.5973	-0.0005973	106.6	-0.582	-0.000582		106.6	-0.7172	-0.0007172	106.6	-0.6616	-0.0006616	106.6	-0.6408	-0.0006408	106.6	-0.6386	-0.0006386	106.6	-0.6326	-0.0006326	106.6	-0.6285	-0.0006285		106.6	-0.7172	-0.0007172	106.6	-0.6214	-0.0006214	106.6	-0.6378	-0.0006378	106.6	-0.6289
	107.1	-0.7172	-0.0007172	107.1	-0.6424	-0.0006424	107.1	-0.6352	-0.0006352	107.1	-0.6109	-0.0006109	107.1	-0.5974	-0.0005974	107.1	-0.5821	-0.0005821		107.1	-0.7172	-0.0007172	107.1	-0.6616	-0.0006616	107.1	-0.6409	-0.0006409	107.1	-0.6386	-0.0006386	107.1	-0.6326	-0.0006326	107.1	-0.6285	-0.0006285		107.1	-0.7172	-0.0007172	107.1	-0.6215	-0.0006215	107.1	-0.6377	-0.0006377	107.1	-0.6291
	107.6	-0.7171	-0.0007171	107.6	-0.6424	-0.0006424	107.6	-0.6352	-0.0006352	107.6	-0.6109	-0.0006109	107.6	-0.5975	-0.0005975	107.6	-0.5821	-0.0005821		107.6	-0.7171	-0.0007171	107.6	-0.6616	-0.0006616	107.6	-0.6409	-0.0006409	107.6	-0.6386	-0.0006386	107.6	-0.6326	-0.0006326	107.6	-0.6285	-0.0006285		107.6	-0.7171	-0.0007171	107.6	-0.6216	-0.0006216	107.6	-0.6377	-0.0006377	107.6	-0.6292
	108.1	-0.7171	-0.0007171	108.1	-0.6424	-0.0006424	108.1	-0.6353	-0.0006353	108.1	-0.6109	-0.0006109	108.1	-0.5976	-0.0005976	108.1	-0.5822	-0.0005822		108.1	-0.7171	-0.0007171	108.1	-0.6616	-0.0006616	108.1	-0.6409	-0.0006409	108.1	-0.6386	-0.0006386	108.1	-0.6326	-0.0006326	108.1	-0.6285	-0.0006285		108.1	-0.7171	-0.0007171	108.1	-0.6216	-0.0006216	108.1	-0.6377	-0.0006377	108.1	-0.6294
	108.6	-0.7171	-0.0007171	108.6	-0.6425	-0.0006425	108.6	-0.6353	-0.0006353	108.6	-0.6109	-0.0006109	108.6	-0.5977	-0.0005977	108.6	-0.5822	-0.0005822		108.6	-0.7171	-0.0007171	108.6	-0.6616	-0.0006616	108.6	-0.6409	-0.0006409	108.6	-0.6386	-0.0006386	108.6	-0.6326	-0.0006326	108.6	-0.6285	-0.0006285		108.6	-0.7171	-0.0007171	108.6	-0.6217	-0.0006217	108.6	-0.6377	-0.0006377	108.6	-0.6296
	109.1	-0.717	-0.000717	109.1	-0.6425	-0.0006425	109.1	-0.6353	-0.0006353	109.1	-0.6109	-0.0006109	109.1	-0.5978	-0.0005978	109.1	-0.5823	-0.0005823		109.1	-0.717	-0.000717	109.1	-0.6615	-0.0006615	109.1	-0.6409	-0.0006409	109.1	-0.6386	-0.0006386	109.1	-0.6326	-0.0006326	109.1	-0.6285	-0.0006285		109.1	-0.717	-0.000717	109.1	-0.6217	-0.0006217	109.1	-0.6378	-0.0006378	109.1	-0.6297
	109.7	-0.717	-0.000717	109.7	-0.6425	-0.0006425	109.7	-0.6353	-0.0006353	109.7	-0.611	-0.000611	109.7	-0.5979	-0.0005979	109.7	-0.5824	-0.0005824		109.7	-0.717	-0.000717	109.7	-0.6615	-0.0006615	109.7	-0.6409	-0.0006409	109.7	-0.6386	-0.0006386	109.7	-0.6326	-0.0006326	109.7	-0.6285	-0.0006285		109.7	-0.717	-0.000717	109.7	-0.6217	-0.0006217	109.7	-0.6378	-0.0006378	109.7	-0.6298
	110.2	-0.7169	-0.0007169	110.2	-0.6425	-0.0006425	110.2	-0.6354	-0.0006354	110.2	-0.611	-0.000611	110.2	-0.598	-0.000598	110.2	-0.5824	-0.0005824		110.2	-0.7169	-0.0007169	110.2	-0.6615	-0.0006615	110.2	-0.641	-0.000641	110.2	-0.6386	-0.0006386	110.2	-0.6326	-0.0006326	110.2	-0.6285	-0.0006285		110.2	-0.7169	-0.0007169	110.2	-0.6218	-0.0006218	110.2	-0.6378	-0.0006378	110.2	-0.63
	110.7	-0.7169	-0.0007169	110.7	-0.6426	-0.0006426	110.7	-0.6354	-0.0006354	110.7	-0.611	-0.000611	110.7	-0.5981	-0.0005981	110.7	-0.5825	-0.0005825		110.7	-0.7169	-0.0007169	110.7	-0.6615	-0.0006615	110.7	-0.641	-0.000641	110.7	-0.6386	-0.0006386	110.7	-0.6326	-0.0006326	110.7	-0.6285	-0.0006285		110.7	-0.7169	-0.0007169	110.7	-0.6218	-0.0006218	110.7	-0.6378	-0.0006378	110.7	-0.6301
	111.2	-0.7168	-0.0007168	111.2	-0.6426	-0.0006426	111.2	-0.6354	-0.0006354	111.2	-0.611	-0.000611	111.2	-0.5982	-0.0005982	111.2	-0.5825	-0.0005825		111.2	-0.7168	-0.0007168	111.2	-0.6615	-0.0006615	111.2	-0.641	-0.000641	111.2	-0.6386	-0.0006386	111.2	-0.6326	-0.0006326	111.2	-0.6285	-0.0006285		111.2	-0.7168	-0.0007168	111.2	-0.6218	-0.0006218	111.2	-0.6378	-0.0006378	111.2	-0.6302
	111.7	-0.7168	-0.0007168	111.7	-0.6426	-0.0006426	111.7	-0.6354	-0.0006354	111.7	-0.611	-0.000611	111.7	-0.5984	-0.0005984	111.7	-0.5826	-0.0005826		111.7	-0.7168	-0.0007168	111.7	-0.6615	-0.0006615	111.7	-0.641	-0.000641	111.7	-0.6386	-0.0006386	111.7	-0.6326	-0.0006326	111.7	-0.6285	-0.0006285		111.7	-0.7168	-0.0007168	111.7	-0.6218	-0.0006218	111.7	-0.6378	-0.0006378	111.7	-0.6303
	112.2	-0.7168	-0.0007168	112.2	-0.6427	-0.0006427	112.2	-0.6354	-0.0006354	112.2	-0.611	-0.000611	112.2	-0.5985	-0.0005985	112.2	-0.5826	-0.0005826		112.2	-0.7168	-0.0007168	112.2	-0.6615	-0.0006615	112.2	-0.641	-0.000641	112.2	-0.6386	-0.0006386	112.2	-0.6326	-0.0006326	112.2	-0.6285	-0.0006285		112.2	-0.7168	-0.0007168	112.2	-0.6219	-0.0006219	112.2	-0.6378	-0.0006378	112.2	-0.6305
	112.7	-0.7167	-0.0007167	112.7	-0.6427	-0.0006427	112.7	-0.6355	-0.0006355	112.7	-0.611	-0.000611	112.7	-0.5986	-0.0005986	112.7	-0.5827	-0.0005827		112.7	-0.7167	-0.0007167	112.7	-0.6614	-0.0006614	112.7	-0.641	-0.000641	112.7	-0.6386	-0.0006386	112.7	-0.6326	-0.0006326	112.7	-0.6285	-0.0006285		112.7	-0.7167	-0.0007167	112.7	-0.622	-0.000622	112.7	-0.6378	-0.0006378	112.7	-0.6306
	113.2	-0.7167	-0.0007167	113.2	-0.6428	-0.0006428	113.2	-0.6355	-0.0006355	113.2	-0.611	-0.000611	113.2	-0.5987	-0.0005987	113.2	-0.5828	-0.0005828		113.2	-0.7167	-0.0007167	113.2	-0.6614	-0.0006614	113.2	-0.641	-0.000641	113.2	-0.6386	-0.0006386	113.2	-0.6326	-0.0006326	113.2	-0.6285	-0.0006285		113.2	-0.7167	-0.0007167	113.2	-0.6221	-0.0006221	113.2	-0.6378	-0.0006378	113.2	-0.6307
	113.7	-0.7167	-0.0007167	113.7	-0.6428	-0.0006428	113.7	-0.6355	-0.0006355	113.7	-0.611	-0.000611	113.7	-0.5988	-0.0005988	113.7	-0.5828	-0.0005828		113.7	-0.7167	-0.0007167	113.7	-0.6614	-0.0006614	113.7	-0.641	-0.000641	113.7	-0.6386	-0.0006386	113.7	-0.6326	-0.0006326	113.7	-0.6285	-0.0006285		113.7	-0.7167	-0.0007167	113.7	-0.6222	-0.0006222	113.7	-0.6378	-0.0006378	113.7	-0.6309
	114.2	-0.7166	-0.0007166	114.2	-0.6429	-0.0006429	114.2	-0.6355	-0.0006355	114.2	-0.611	-0.000611	114.2	-0.5988	-0.0005988	114.2	-0.5828	-0.0005828		114.2	-0.7166	-0.0007166	114.2	-0.6614	-0.0006614	114.2	-0.6411	-0.0006411	114.2	-0.6385	-0.0006385	114.2	-0.6326	-0.0006326	114.2	-0.6285	-0.0006285		114.2	-0.7166	-0.0007166	114.2	-0.6222	-0.0006222	114.2	-0.6378	-0.0006378	114.2	-0.631
	114.8	-0.7166	-0.0007166	114.8	-0.6429	-0.0006429	114.8	-0.6355	-0.0006355	114.8	-0.611	-0.000611	114.8	-0.5989	-0.0005989	114.8	-0.5829	-0.0005829		114.8	-0.7166	-0.0007166	114.8	-0.6614	-0.0006614	114.8	-0.6411	-0.0006411	114.8	-0.6385	-0.0006385	114.8	-0.6326	-0.0006326	114.8	-0.6285	-0.0006285		114.8	-0.7166	-0.0007166	114.8	-0.6223	-0.0006223	114.8	-0.6377	-0.0006377	114.8	-0.6311
	115.3	-0.7165	-0.0007165	115.3	-0.643	-0.000643	115.3	-0.6356	-0.0006356	115.3	-0.6111	-0.0006111	115.3	-0.599	-0.000599	115.3	-0.5829	-0.0005829		115.3	-0.7165	-0.0007165	115.3	-0.6614	-0.0006614	115.3	-0.6411	-0.0006411	115.3	-0.6385	-0.0006385	115.3	-0.6326	-0.0006326	115.3	-0.6285	-0.0006285		115.3	-0.7165	-0.0007165	115.3	-0.6223	-0.0006223	115.3	-0.6377	-0.0006377	115.3	-0.6313
	115.8	-0.7165	-0.0007165	115.8	-0.6431	-0.0006431	115.8	-0.6356	-0.0006356	115.8	-0.6111	-0.0006111	115.8	-0.5991	-0.0005991	115.8	-0.583	-0.000583		115.8	-0.7165	-0.0007165	115.8	-0.6614	-0.0006614	115.8	-0.6411	-0.0006411	115.8	-0.6385	-0.0006385	115.8	-0.6326	-0.0006326	115.8	-0.6285	-0.0006285		115.8	-0.7165	-0.0007165	115.8	-0.6224	-0.0006224	115.8	-0.6377	-0.0006377	115.8	-0.6314
	116.3	-0.7165	-0.0007165	116.3	-0.6431	-0.0006431	116.3	-0.6356	-0.0006356	116.3	-0.6111	-0.0006111	116.3	-0.5992	-0.0005992	116.3	-0.583	-0.000583		116.3	-0.7165	-0.0007165	116.3	-0.6613	-0.0006613	116.3	-0.6411	-0.0006411	116.3	-0.6385	-0.0006385	116.3	-0.6326	-0.0006326	116.3	-0.6285	-0.0006285		116.3	-0.7165	-0.0007165	116.3	-0.6224	-0.0006224	116.3	-0.6377	-0.0006377	116.3	-0.6315
	116.8	-0.7165	-0.0007165	116.8	-0.6432	-0.0006432	116.8	-0.6356	-0.0006356	116.8	-0.6111	-0.0006111	116.8	-0.5993	-0.0005993	116.8	-0.5831	-0.0005831		116.8	-0.7165	-0.0007165	116.8	-0.6613	-0.0006613	116.8	-0.6411	-0.0006411	116.8	-0.6385	-0.0006385	116.8	-0.6326	-0.0006326	116.8	-0.6286	-0.0006286		116.8	-0.7165	-0.0007165	116.8	-0.6225	-0.0006225	116.8	-0.6378	-0.0006378	116.8	-0.6317
	117.3	-0.7164	-0.0007164	117.3	-0.6432	-0.0006432	117.3	-0.6356	-0.0006356	117.3	-0.6111	-0.0006111	117.3	-0.5994	-0.0005994	117.3	-0.5831	-0.0005831		117.3	-0.7164	-0.0007164	117.3	-0.6613	-0.0006613	117.3	-0.6412	-0.0006412	117.3	-0.6385	-0.0006385	117.3	-0.6327	-0.0006327	117.3	-0.6286	-0.0006286		117.3	-0.7164	-0.0007164	117.3	-0.6225	-0.0006225	117.3	-0.6378	-0.0006378	117.3	-0.6318
	117.8	-0.7164	-0.0007164	117.8	-0.6432	-0.0006432	117.8	-0.6357	-0.0006357	117.8	-0.6111	-0.0006111	117.8	-0.5995	-0.0005995	117.8	-0.5832	-0.0005832		117.8	-0.7164	-0.0007164	117.8	-0.6613	-0.0006613	117.8	-0.6412	-0.0006412	117.8	-0.6385	-0.0006385	117.8	-0.6327	-0.0006327	117.8	-0.6285	-0.0006285		117.8	-0.7164	-0.0007164	117.8	-0.6226	-0.0006226	117.8	-0.6378	-0.0006378	117.8	-0.632
	118.3	-0.7164	-0.0007164	118.3	-0.6433	-0.0006433	118.3	-0.6357	-0.0006357	118.3	-0.6111	-0.0006111	118.3	-0.5995	-0.0005995	118.3	-0.5833	-0.0005833		118.3	-0.7164	-0.0007164	118.3	-0.6613	-0.0006613	118.3	-0.6412	-0.0006412	118.3	-0.6385	-0.0006385	118.3	-0.6327	-0.0006327	118.3	-0.6285	-0.0006285		118.3	-0.7164	-0.0007164	118.3	-0.6227	-0.0006227	118.3	-0.6378	-0.0006378	118.3	-0.6321
	118.8	-0.7164	-0.0007164	118.8	-0.6433	-0.0006433	118.8	-0.6357	-0.0006357	118.8	-0.6111	-0.0006111	118.8	-0.5996	-0.0005996	118.8	-0.5833	-0.0005833		118.8	-0.7164	-0.0007164	118.8	-0.6613	-0.0006613	118.8	-0.6412	-0.0006412	118.8	-0.6385	-0.0006385	118.8	-0.6327	-0.0006327	118.8	-0.6285	-0.0006285		118.8	-0.7164	-0.0007164	118.8	-0.6228	-0.0006228	118.8	-0.6378	-0.0006378	118.8	-0.6322
	119.3	-0.7164	-0.0007164	119.3	-0.6434	-0.0006434	119.3	-0.6357	-0.0006357	119.3	-0.6112	-0.0006112	119.3	-0.5997	-0.0005997	119.3	-0.5834	-0.0005834		119.3	-0.7164	-0.0007164	119.3	-0.6613	-0.0006613	119.3	-0.6412	-0.0006412	119.3	-0.6385	-0.0006385	119.3	-0.6327	-0.0006327	119.3	-0.6286	-0.0006286		119.3	-0.7164	-0.0007164	119.3	-0.6229	-0.0006229	119.3	-0.6378	-0.0006378	119.3	-0.6324
	119.8	-0.7164	-0.0007164	119.8	-0.6434	-0.0006434	119.8	-0.6357	-0.0006357	119.8	-0.6112	-0.0006112	119.8	-0.5998	-0.0005998	119.8	-0.5834	-0.0005834		119.8	-0.7164	-0.0007164	119.8	-0.6613	-0.0006613	119.8	-0.6412	-0.0006412	119.8	-0.6385	-0.0006385	119.8	-0.6327	-0.0006327	119.8	-0.6286	-0.0006286		119.8	-0.7164	-0.0007164	119.8	-0.6229	-0.0006229	119.8	-0.6378	-0.0006378	119.8	-0.6325
	120.4	-0.7164	-0.0007164	120.4	-0.6435	-0.0006435	120.4	-0.6358	-0.0006358	120.4	-0.6112	-0.0006112	120.4	-0.5998	-0.0005998	120.4	-0.5835	-0.0005835		120.4	-0.7164	-0.0007164	120.4	-0.6612	-0.0006612	120.4	-0.6412	-0.0006412	120.4	-0.6385	-0.0006385	120.4	-0.6327	-0.0006327	120.4	-0.6286	-0.0006286		120.4	-0.7164	-0.0007164	120.4	-0.623	-0.000623	120.4	-0.6378	-0.0006378	120.4	-0.6326
	120.9	-0.7164	-0.0007164	120.9	-0.6435	-0.0006435	120.9	-0.6358	-0.0006358	120.9	-0.6111	-0.0006111	120.9	-0.5999	-0.0005999	120.9	-0.5836	-0.0005836		120.9	-0.7164	-0.0007164	120.9	-0.6612	-0.0006612	120.9	-0.6413	-0.0006413	120.9	-0.6385	-0.0006385	120.9	-0.6327	-0.0006327	120.9	-0.6286	-0.0006286		120.9	-0.7164	-0.0007164	120.9	-0.623	-0.000623	120.9	-0.6378	-0.0006378	120.9	-0.6328
	121.4	-0.7164	-0.0007164	121.4	-0.6436	-0.0006436	121.4	-0.6358	-0.0006358	121.4	-0.6111	-0.0006111	121.4	-0.6	-0.0006	121.4	-0.5836	-0.0005836		121.4	-0.7164	-0.0007164	121.4	-0.6612	-0.0006612	121.4	-0.6413	-0.0006413	121.4	-0.6385	-0.0006385	121.4	-0.6327	-0.0006327	121.4	-0.6286	-0.0006286		121.4	-0.7164	-0.0007164	121.4	-0.6231	-0.0006231	121.4	-0.6378	-0.0006378	121.4	-0.6329
	121.9	-0.7164	-0.0007164	121.9	-0.6436	-0.0006436	121.9	-0.6358	-0.0006358	121.9	-0.6111	-0.0006111	121.9	-0.6001	-0.0006001	121.9	-0.5837	-0.0005837		121.9	-0.7164	-0.0007164	121.9	-0.6612	-0.0006612	121.9	-0.6413	-0.0006413	121.9	-0.6385	-0.0006385	121.9	-0.6327	-0.0006327	121.9	-0.6286	-0.0006286		121.9	-0.7164	-0.0007164	121.9	-0.6232	-0.0006232	121.9	-0.6378	-0.0006378	121.9	-0.6331
	122.4	-0.7164	-0.0007164	122.4	-0.6436	-0.0006436	122.4	-0.6358	-0.0006358	122.4	-0.6111	-0.0006111	122.4	-0.6002	-0.0006002	122.4	-0.5837	-0.0005837		122.4	-0.7164	-0.0007164	122.4	-0.6612	-0.0006612	122.4	-0.6413	-0.0006413	122.4	-0.6385	-0.0006385	122.4	-0.6328	-0.0006328	122.4	-0.6286	-0.0006286		122.4	-0.7164	-0.0007164	122.4	-0.6233	-0.0006233	122.4	-0.6378	-0.0006378	122.4	-0.6333
	122.9	-0.7164	-0.0007164	122.9	-0.6437	-0.0006437	122.9	-0.6359	-0.0006359	122.9	-0.6111	-0.0006111	122.9	-0.6002	-0.0006002	122.9	-0.5838	-0.0005838		122.9	-0.7164	-0.0007164	122.9	-0.6612	-0.0006612	122.9	-0.6413	-0.0006413	122.9	-0.6384	-0.0006384	122.9	-0.6328	-0.0006328	122.9	-0.6286	-0.0006286		122.9	-0.7164	-0.0007164	122.9	-0.6234	-0.0006234	122.9	-0.6378	-0.0006378	122.9	-0.6334
	123.4	-0.7164	-0.0007164	123.4	-0.6437	-0.0006437	123.4	-0.6359	-0.0006359	123.4	-0.6111	-0.0006111	123.4	-0.6003	-0.0006003	123.4	-0.5839	-0.0005839		123.4	-0.7164	-0.0007164	123.4	-0.6612	-0.0006612	123.4	-0.6413	-0.0006413	123.4	-0.6384	-0.0006384	123.4	-0.6328	-0.0006328	123.4	-0.6286	-0.0006286		123.4	-0.7164	-0.0007164	123.4	-0.6234	-0.0006234	123.4	-0.6378	-0.0006378	123.4	-0.6335
	123.9	-0.7163	-0.0007163	123.9	-0.6438	-0.0006438	123.9	-0.6359	-0.0006359	123.9	-0.6111	-0.0006111	123.9	-0.6004	-0.0006004	123.9	-0.5839	-0.0005839		123.9	-0.7163	-0.0007163	123.9	-0.6612	-0.0006612	123.9	-0.6414	-0.0006414	123.9	-0.6384	-0.0006384	123.9	-0.6328	-0.0006328	123.9	-0.6286	-0.0006286		123.9	-0.7163	-0.0007163	123.9	-0.6235	-0.0006235	123.9	-0.6378	-0.0006378	123.9	-0.6337
	124.4	-0.7163	-0.0007163	124.4	-0.6438	-0.0006438	124.4	-0.6359	-0.0006359	124.4	-0.6111	-0.0006111	124.4	-0.6004	-0.0006004	124.4	-0.584	-0.000584		124.4	-0.7163	-0.0007163	124.4	-0.6611	-0.0006611	124.4	-0.6414	-0.0006414	124.4	-0.6384	-0.0006384	124.4	-0.6328	-0.0006328	124.4	-0.6286	-0.0006286		124.4	-0.7163	-0.0007163	124.4	-0.6235	-0.0006235	124.4	-0.6378	-0.0006378	124.4	-0.6338
	124.9	-0.7162	-0.0007162	124.9	-0.6438	-0.0006438	124.9	-0.6359	-0.0006359	124.9	-0.6112	-0.0006112	124.9	-0.6005	-0.0006005	124.9	-0.584	-0.000584		124.9	-0.7162	-0.0007162	124.9	-0.6611	-0.0006611	124.9	-0.6414	-0.0006414	124.9	-0.6384	-0.0006384	124.9	-0.6328	-0.0006328	124.9	-0.6286	-0.0006286		124.9	-0.7162	-0.0007162	124.9	-0.6236	-0.0006236	124.9	-0.6378	-0.0006378	124.9	-0.6339
	125.5	-0.7162	-0.0007162	125.5	-0.6438	-0.0006438	125.5	-0.6359	-0.0006359	125.5	-0.6112	-0.0006112	125.5	-0.6006	-0.0006006	125.5	-0.5841	-0.0005841		125.5	-0.7162	-0.0007162	125.5	-0.6611	-0.0006611	125.5	-0.6414	-0.0006414	125.5	-0.6384	-0.0006384	125.5	-0.6328	-0.0006328	125.5	-0.6286	-0.0006286		125.5	-0.7162	-0.0007162	125.5	-0.6237	-0.0006237	125.5	-0.6378	-0.0006378	125.5	-0.634
	126	-0.7162	-0.0007162	126	-0.6438	-0.0006438	126	-0.636	-0.000636	126	-0.6113	-0.0006113	126	-0.6006	-0.0006006	126	-0.5841	-0.0005841		126	-0.7162	-0.0007162	126	-0.6611	-0.0006611	126	-0.6414	-0.0006414	126	-0.6384	-0.0006384	126	-0.6328	-0.0006328	126	-0.6286	-0.0006286		126	-0.7162	-0.0007162	126	-0.6238	-0.0006238	126	-0.6378	-0.0006378	126	-0.6341
	126.5	-0.7162	-0.0007162	126.5	-0.6439	-0.0006439	126.5	-0.636	-0.000636	126.5	-0.6114	-0.0006114	126.5	-0.6007	-0.0006007	126.5	-0.5842	-0.0005842		126.5	-0.7162	-0.0007162	126.5	-0.6611	-0.0006611	126.5	-0.6414	-0.0006414	126.5	-0.6384	-0.0006384	126.5	-0.6328	-0.0006328	126.5	-0.6286	-0.0006286		126.5	-0.7162	-0.0007162	126.5	-0.6238	-0.0006238	126.5	-0.6378	-0.0006378	126.5	-0.6342
	127	-0.7162	-0.0007162	127	-0.6439	-0.0006439	127	-0.636	-0.000636	127	-0.6114	-0.0006114	127	-0.6007	-0.0006007	127	-0.5843	-0.0005843		127	-0.7162	-0.0007162	127	-0.6611	-0.0006611	127	-0.6414	-0.0006414	127	-0.6384	-0.0006384	127	-0.6328	-0.0006328	127	-0.6286	-0.0006286		127	-0.7162	-0.0007162	127	-0.6239	-0.0006239	127	-0.6378	-0.0006378	127	-0.6343
	127.5	-0.7161	-0.0007161	127.5	-0.6439	-0.0006439	127.5	-0.636	-0.000636	127.5	-0.6114	-0.0006114	127.5	-0.6008	-0.0006008	127.5	-0.5843	-0.0005843		127.5	-0.7161	-0.0007161	127.5	-0.6611	-0.0006611	127.5	-0.6414	-0.0006414	127.5	-0.6384	-0.0006384	127.5	-0.6328	-0.0006328	127.5	-0.6286	-0.0006286		127.5	-0.7161	-0.0007161	127.5	-0.624	-0.000624	127.5	-0.6378	-0.0006378	127.5	-0.6344
	128	-0.7161	-0.0007161	128	-0.6439	-0.0006439	128	-0.636	-0.000636	128	-0.6114	-0.0006114	128	-0.6008	-0.0006008	128	-0.5844	-0.0005844		128	-0.7161	-0.0007161	128	-0.6611	-0.0006611	128	-0.6414	-0.0006414	128	-0.6384	-0.0006384	128	-0.6328	-0.0006328	128	-0.6286	-0.0006286		128	-0.7161	-0.0007161	128	-0.624	-0.000624	128	-0.6378	-0.0006378	128	-0.6345
	128.5	-0.7161	-0.0007161	128.5	-0.644	-0.000644	128.5	-0.6361	-0.0006361	128.5	-0.6114	-0.0006114	128.5	-0.6009	-0.0006009	128.5	-0.5844	-0.0005844		128.5	-0.7161	-0.0007161	128.5	-0.6611	-0.0006611	128.5	-0.6414	-0.0006414	128.5	-0.6384	-0.0006384	128.5	-0.6328	-0.0006328	128.5	-0.6286	-0.0006286		128.5	-0.7161	-0.0007161	128.5	-0.6241	-0.0006241	128.5	-0.6378	-0.0006378	128.5	-0.6345
	129	-0.716	-0.000716	129	-0.644	-0.000644	129	-0.6361	-0.0006361	129	-0.6114	-0.0006114	129	-0.601	-0.000601	129	-0.5845	-0.0005845		129	-0.716	-0.000716	129	-0.6611	-0.0006611	129	-0.6415	-0.0006415	129	-0.6384	-0.0006384	129	-0.6328	-0.0006328	129	-0.6286	-0.0006286		129	-0.716	-0.000716	129	-0.6242	-0.0006242	129	-0.6378	-0.0006378	129	-0.6346
	129.5	-0.716	-0.000716	129.5	-0.644	-0.000644	129.5	-0.6361	-0.0006361	129.5	-0.6114	-0.0006114	129.5	-0.601	-0.000601	129.5	-0.5846	-0.0005846		129.5	-0.716	-0.000716	129.5	-0.661	-0.000661	129.5	-0.6415	-0.0006415	129.5	-0.6384	-0.0006384	129.5	-0.6329	-0.0006329	129.5	-0.6286	-0.0006286		129.5	-0.716	-0.000716	129.5	-0.6242	-0.0006242	129.5	-0.6378	-0.0006378	129.5	-0.6347
	130.1	-0.716	-0.000716	130.1	-0.644	-0.000644	130.1	-0.6361	-0.0006361	130.1	-0.6114	-0.0006114	130.1	-0.6011	-0.0006011	130.1	-0.5846	-0.0005846		130.1	-0.716	-0.000716	130.1	-0.661	-0.000661	130.1	-0.6415	-0.0006415	130.1	-0.6384	-0.0006384	130.1	-0.6329	-0.0006329	130.1	-0.6286	-0.0006286		130.1	-0.716	-0.000716	130.1	-0.6243	-0.0006243	130.1	-0.6378	-0.0006378	130.1	-0.6348
	130.6	-0.716	-0.000716	130.6	-0.6441	-0.0006441	130.6	-0.6361	-0.0006361	130.6	-0.6115	-0.0006115	130.6	-0.6012	-0.0006012	130.6	-0.5847	-0.0005847		130.6	-0.716	-0.000716	130.6	-0.661	-0.000661	130.6	-0.6415	-0.0006415	130.6	-0.6384	-0.0006384	130.6	-0.6329	-0.0006329	130.6	-0.6286	-0.0006286		130.6	-0.716	-0.000716	130.6	-0.6244	-0.0006244	130.6	-0.6378	-0.0006378	130.6	-0.6348
	131.1	-0.7159	-0.0007159	131.1	-0.6441	-0.0006441	131.1	-0.6361	-0.0006361	131.1	-0.6115	-0.0006115	131.1	-0.6012	-0.0006012	131.1	-0.5847	-0.0005847		131.1	-0.7159	-0.0007159	131.1	-0.661	-0.000661	131.1	-0.6415	-0.0006415	131.1	-0.6384	-0.0006384	131.1	-0.6329	-0.0006329	131.1	-0.6286	-0.0006286		131.1	-0.7159	-0.0007159	131.1	-0.6244	-0.0006244	131.1	-0.6378	-0.0006378	131.1	-0.6349
	131.6	-0.7159	-0.0007159	131.6	-0.6441	-0.0006441	131.6	-0.6362	-0.0006362	131.6	-0.6115	-0.0006115	131.6	-0.6013	-0.0006013	131.6	-0.5848	-0.0005848		131.6	-0.7159	-0.0007159	131.6	-0.661	-0.000661	131.6	-0.6415	-0.0006415	131.6	-0.6384	-0.0006384	131.6	-0.6329	-0.0006329	131.6	-0.6286	-0.0006286		131.6	-0.7159	-0.0007159	131.6	-0.6245	-0.0006245	131.6	-0.6378	-0.0006378	131.6	-0.635
	132.1	-0.7159	-0.0007159	132.1	-0.6441	-0.0006441	132.1	-0.6362	-0.0006362	132.1	-0.6116	-0.0006116	132.1	-0.6014	-0.0006014	132.1	-0.5848	-0.0005848		132.1	-0.7159	-0.0007159	132.1	-0.661	-0.000661	132.1	-0.6415	-0.0006415	132.1	-0.6384	-0.0006384	132.1	-0.6329	-0.0006329	132.1	-0.6286	-0.0006286		132.1	-0.7159	-0.0007159	132.1	-0.6245	-0.0006245	132.1	-0.6378	-0.0006378	132.1	-0.635
	132.6	-0.7159	-0.0007159	132.6	-0.6441	-0.0006441	132.6	-0.6362	-0.0006362	132.6	-0.6116	-0.0006116	132.6	-0.6014	-0.0006014	132.6	-0.5849	-0.0005849		132.6	-0.7159	-0.0007159	132.6	-0.661	-0.000661	132.6	-0.6415	-0.0006415	132.6	-0.6384	-0.0006384	132.6	-0.6329	-0.0006329	132.6	-0.6286	-0.0006286		132.6	-0.7159	-0.0007159	132.6	-0.6246	-0.0006246	132.6	-0.6378	-0.0006378	132.6	-0.6351
	133.1	-0.7159	-0.0007159	133.1	-0.6442	-0.0006442	133.1	-0.6362	-0.0006362	133.1	-0.6116	-0.0006116	133.1	-0.6015	-0.0006015	133.1	-0.585	-0.000585		133.1	-0.7159	-0.0007159	133.1	-0.661	-0.000661	133.1	-0.6415	-0.0006415	133.1	-0.6384	-0.0006384	133.1	-0.6329	-0.0006329	133.1	-0.6286	-0.0006286		133.1	-0.7159	-0.0007159	133.1	-0.6247	-0.0006247	133.1	-0.6378	-0.0006378	133.1	-0.6352
	133.6	-0.7158	-0.0007158	133.6	-0.6442	-0.0006442	133.6	-0.6362	-0.0006362	133.6	-0.6116	-0.0006116	133.6	-0.6015	-0.0006015	133.6	-0.585	-0.000585		133.6	-0.7158	-0.0007158	133.6	-0.661	-0.000661	133.6	-0.6415	-0.0006415	133.6	-0.6384	-0.0006384	133.6	-0.6329	-0.0006329	133.6	-0.6286	-0.0006286		133.6	-0.7158	-0.0007158	133.6	-0.6247	-0.0006247	133.6	-0.6378	-0.0006378	133.6	-0.6352
	134.1	-0.7158	-0.0007158	134.1	-0.6442	-0.0006442	134.1	-0.6363	-0.0006363	134.1	-0.6116	-0.0006116	134.1	-0.6016	-0.0006016	134.1	-0.5851	-0.0005851		134.1	-0.7158	-0.0007158	134.1	-0.6609	-0.0006609	134.1	-0.6416	-0.0006416	134.1	-0.6384	-0.0006384	134.1	-0.6329	-0.0006329	134.1	-0.6286	-0.0006286		134.1	-0.7158	-0.0007158	134.1	-0.6248	-0.0006248	134.1	-0.6378	-0.0006378	134.1	-0.6353
	134.6	-0.7158	-0.0007158	134.6	-0.6442	-0.0006442	134.6	-0.6363	-0.0006363	134.6	-0.6116	-0.0006116	134.6	-0.6016	-0.0006016	134.6	-0.5852	-0.0005852		134.6	-0.7158	-0.0007158	134.6	-0.6609	-0.0006609	134.6	-0.6416	-0.0006416	134.6	-0.6384	-0.0006384	134.6	-0.6329	-0.0006329	134.6	-0.6286	-0.0006286		134.6	-0.7158	-0.0007158	134.6	-0.6248	-0.0006248	134.6	-0.6378	-0.0006378	134.6	-0.6353
	135.1	-0.7158	-0.0007158	135.1	-0.6443	-0.0006443	135.1	-0.6363	-0.0006363	135.1	-0.6116	-0.0006116	135.1	-0.6017	-0.0006017	135.1	-0.5852	-0.0005852		135.1	-0.7158	-0.0007158	135.1	-0.6609	-0.0006609	135.1	-0.6416	-0.0006416	135.1	-0.6384	-0.0006384	135.1	-0.6329	-0.0006329	135.1	-0.6286	-0.0006286		135.1	-0.7158	-0.0007158	135.1	-0.6249	-0.0006249	135.1	-0.6378	-0.0006378	135.1	-0.6354
	135.7	-0.7157	-0.0007157	135.7	-0.6443	-0.0006443	135.7	-0.6363	-0.0006363	135.7	-0.6116	-0.0006116	135.7	-0.6018	-0.0006018	135.7	-0.5853	-0.0005853		135.7	-0.7157	-0.0007157	135.7	-0.6609	-0.0006609	135.7	-0.6416	-0.0006416	135.7	-0.6384	-0.0006384	135.7	-0.6329	-0.0006329	135.7	-0.6286	-0.0006286		135.7	-0.7157	-0.0007157	135.7	-0.625	-0.000625	135.7	-0.6378	-0.0006378	135.7	-0.6354
	136.2	-0.7157	-0.0007157	136.2	-0.6443	-0.0006443	136.2	-0.6363	-0.0006363	136.2	-0.6116	-0.0006116	136.2	-0.6018	-0.0006018	136.2	-0.5854	-0.0005854		136.2	-0.7157	-0.0007157	136.2	-0.6609	-0.0006609	136.2	-0.6416	-0.0006416	136.2	-0.6384	-0.0006384	136.2	-0.6329	-0.0006329	136.2	-0.6286	-0.0006286		136.2	-0.7157	-0.0007157	136.2	-0.6251	-0.0006251	136.2	-0.6378	-0.0006378	136.2	-0.6355
	136.7	-0.7157	-0.0007157	136.7	-0.6444	-0.0006444	136.7	-0.6363	-0.0006363	136.7	-0.6116	-0.0006116	136.7	-0.6019	-0.0006019	136.7	-0.5854	-0.0005854		136.7	-0.7157	-0.0007157	136.7	-0.6609	-0.0006609	136.7	-0.6416	-0.0006416	136.7	-0.6384	-0.0006384	136.7	-0.6329	-0.0006329	136.7	-0.6286	-0.0006286		136.7	-0.7157	-0.0007157	136.7	-0.6251	-0.0006251	136.7	-0.6378	-0.0006378	136.7	-0.6355
	137.2	-0.7157	-0.0007157	137.2	-0.6444	-0.0006444	137.2	-0.6364	-0.0006364	137.2	-0.6116	-0.0006116	137.2	-0.6019	-0.0006019	137.2	-0.5855	-0.0005855		137.2	-0.7157	-0.0007157	137.2	-0.6609	-0.0006609	137.2	-0.6416	-0.0006416	137.2	-0.6384	-0.0006384	137.2	-0.633	-0.000633	137.2	-0.6286	-0.0006286		137.2	-0.7157	-0.0007157	137.2	-0.6252	-0.0006252	137.2	-0.6378	-0.0006378	137.2	-0.6356
	137.7	-0.7157	-0.0007157	137.7	-0.6444	-0.0006444	137.7	-0.6364	-0.0006364	137.7	-0.6116	-0.0006116	137.7	-0.602	-0.000602	137.7	-0.5856	-0.0005856		137.7	-0.7157	-0.0007157	137.7	-0.6609	-0.0006609	137.7	-0.6416	-0.0006416	137.7	-0.6384	-0.0006384	137.7	-0.633	-0.000633	137.7	-0.6286	-0.0006286		137.7	-0.7157	-0.0007157	137.7	-0.6253	-0.0006253	137.7	-0.6379	-0.0006379	137.7	-0.6356
	138.2	-0.7157	-0.0007157	138.2	-0.6444	-0.0006444	138.2	-0.6364	-0.0006364	138.2	-0.6117	-0.0006117	138.2	-0.6021	-0.0006021	138.2	-0.5856	-0.0005856		138.2	-0.7157	-0.0007157	138.2	-0.6608	-0.0006608	138.2	-0.6417	-0.0006417	138.2	-0.6383	-0.0006383	138.2	-0.633	-0.000633	138.2	-0.6286	-0.0006286		138.2	-0.7157	-0.0007157	138.2	-0.6253	-0.0006253	138.2	-0.6379	-0.0006379	138.2	-0.6356
	138.7	-0.7156	-0.0007156	138.7	-0.6445	-0.0006445	138.7	-0.6364	-0.0006364	138.7	-0.6117	-0.0006117	138.7	-0.6021	-0.0006021	138.7	-0.5857	-0.0005857		138.7	-0.7156	-0.0007156	138.7	-0.6608	-0.0006608	138.7	-0.6417	-0.0006417	138.7	-0.6383	-0.0006383	138.7	-0.633	-0.000633	138.7	-0.6286	-0.0006286		138.7	-0.7156	-0.0007156	138.7	-0.6254	-0.0006254	138.7	-0.6379	-0.0006379	138.7	-0.6357
	139.2	-0.7156	-0.0007156	139.2	-0.6445	-0.0006445	139.2	-0.6364	-0.0006364	139.2	-0.6117	-0.0006117	139.2	-0.6022	-0.0006022	139.2	-0.5858	-0.0005858		139.2	-0.7156	-0.0007156	139.2	-0.6608	-0.0006608	139.2	-0.6417	-0.0006417	139.2	-0.6383	-0.0006383	139.2	-0.633	-0.000633	139.2	-0.6286	-0.0006286		139.2	-0.7156	-0.0007156	139.2	-0.6255	-0.0006255	139.2	-0.6379	-0.0006379	139.2	-0.6357
	139.7	-0.7156	-0.0007156	139.7	-0.6445	-0.0006445	139.7	-0.6365	-0.0006365	139.7	-0.6117	-0.0006117	139.7	-0.6022	-0.0006022	139.7	-0.5858	-0.0005858		139.7	-0.7156	-0.0007156	139.7	-0.6608	-0.0006608	139.7	-0.6417	-0.0006417	139.7	-0.6383	-0.0006383	139.7	-0.633	-0.000633	139.7	-0.6287	-0.0006287		139.7	-0.7156	-0.0007156	139.7	-0.6256	-0.0006256	139.7	-0.6378	-0.0006378	139.7	-0.6358
	140.3	-0.7156	-0.0007156	140.3	-0.6445	-0.0006445	140.3	-0.6365	-0.0006365	140.3	-0.6117	-0.0006117	140.3	-0.6023	-0.0006023	140.3	-0.5859	-0.0005859		140.3	-0.7156	-0.0007156	140.3	-0.6608	-0.0006608	140.3	-0.6417	-0.0006417	140.3	-0.6383	-0.0006383	140.3	-0.633	-0.000633	140.3	-0.6287	-0.0006287		140.3	-0.7156	-0.0007156	140.3	-0.6256	-0.0006256	140.3	-0.6378	-0.0006378	140.3	-0.6358
	140.8	-0.7155	-0.0007155	140.8	-0.6446	-0.0006446	140.8	-0.6365	-0.0006365	140.8	-0.6117	-0.0006117	140.8	-0.6024	-0.0006024	140.8	-0.586	-0.000586		140.8	-0.7155	-0.0007155	140.8	-0.6608	-0.0006608	140.8	-0.6417	-0.0006417	140.8	-0.6383	-0.0006383	140.8	-0.633	-0.000633	140.8	-0.6287	-0.0006287		140.8	-0.7155	-0.0007155	140.8	-0.6257	-0.0006257	140.8	-0.6378	-0.0006378	140.8	-0.6358
	141.3	-0.7155	-0.0007155	141.3	-0.6446	-0.0006446	141.3	-0.6365	-0.0006365	141.3	-0.6117	-0.0006117	141.3	-0.6024	-0.0006024	141.3	-0.586	-0.000586		141.3	-0.7155	-0.0007155	141.3	-0.6607	-0.0006607	141.3	-0.6417	-0.0006417	141.3	-0.6383	-0.0006383	141.3	-0.633	-0.000633	141.3	-0.6287	-0.0006287		141.3	-0.7155	-0.0007155	141.3	-0.6257	-0.0006257	141.3	-0.6378	-0.0006378	141.3	-0.6359
	141.8	-0.7155	-0.0007155	141.8	-0.6446	-0.0006446	141.8	-0.6365	-0.0006365	141.8	-0.6117	-0.0006117	141.8	-0.6025	-0.0006025	141.8	-0.5861	-0.0005861		141.8	-0.7155	-0.0007155	141.8	-0.6607	-0.0006607	141.8	-0.6417	-0.0006417	141.8	-0.6383	-0.0006383	141.8	-0.633	-0.000633	141.8	-0.6287	-0.0006287		141.8	-0.7155	-0.0007155	141.8	-0.6258	-0.0006258	141.8	-0.6378	-0.0006378	141.8	-0.6359
	142.3	-0.7154	-0.0007154	142.3	-0.6447	-0.0006447	142.3	-0.6366	-0.0006366	142.3	-0.6117	-0.0006117	142.3	-0.6025	-0.0006025	142.3	-0.5862	-0.0005862		142.3	-0.7154	-0.0007154	142.3	-0.6607	-0.0006607	142.3	-0.6418	-0.0006418	142.3	-0.6383	-0.0006383	142.3	-0.633	-0.000633	142.3	-0.6286	-0.0006286		142.3	-0.7154	-0.0007154	142.3	-0.6259	-0.0006259	142.3	-0.6378	-0.0006378	142.3	-0.6359
	142.8	-0.7154	-0.0007154	142.8	-0.6447	-0.0006447	142.8	-0.6366	-0.0006366	142.8	-0.6117	-0.0006117	142.8	-0.6026	-0.0006026	142.8	-0.5862	-0.0005862		142.8	-0.7154	-0.0007154	142.8	-0.6607	-0.0006607	142.8	-0.6418	-0.0006418	142.8	-0.6383	-0.0006383	142.8	-0.633	-0.000633	142.8	-0.6286	-0.0006286		142.8	-0.7154	-0.0007154	142.8	-0.626	-0.000626	142.8	-0.6378	-0.0006378	142.8	-0.636
	143.3	-0.7154	-0.0007154	143.3	-0.6447	-0.0006447	143.3	-0.6366	-0.0006366	143.3	-0.6117	-0.0006117	143.3	-0.6027	-0.0006027	143.3	-0.5863	-0.0005863		143.3	-0.7154	-0.0007154	143.3	-0.6607	-0.0006607	143.3	-0.6418	-0.0006418	143.3	-0.6383	-0.0006383	143.3	-0.633	-0.000633	143.3	-0.6286	-0.0006286		143.3	-0.7154	-0.0007154	143.3	-0.6261	-0.0006261	143.3	-0.6378	-0.0006378	143.3	-0.636
	143.8	-0.7154	-0.0007154	143.8	-0.6447	-0.0006447	143.8	-0.6366	-0.0006366	143.8	-0.6117	-0.0006117	143.8	-0.6027	-0.0006027	143.8	-0.5864	-0.0005864		143.8	-0.7154	-0.0007154	143.8	-0.6607	-0.0006607	143.8	-0.6418	-0.0006418	143.8	-0.6383	-0.0006383	143.8	-0.633	-0.000633	143.8	-0.6286	-0.0006286		143.8	-0.7154	-0.0007154	143.8	-0.6261	-0.0006261	143.8	-0.6378	-0.0006378	143.8	-0.636
	144.3	-0.7153	-0.0007153	144.3	-0.6448	-0.0006448	144.3	-0.6366	-0.0006366	144.3	-0.6118	-0.0006118	144.3	-0.6028	-0.0006028	144.3	-0.5864	-0.0005864		144.3	-0.7153	-0.0007153	144.3	-0.6606	-0.0006606	144.3	-0.6418	-0.0006418	144.3	-0.6383	-0.0006383	144.3	-0.633	-0.000633	144.3	-0.6286	-0.0006286		144.3	-0.7153	-0.0007153	144.3	-0.6262	-0.0006262	144.3	-0.6378	-0.0006378	144.3	-0.636
	144.8	-0.7153	-0.0007153	144.8	-0.6448	-0.0006448	144.8	-0.6366	-0.0006366	144.8	-0.6118	-0.0006118	144.8	-0.6028	-0.0006028	144.8	-0.5865	-0.0005865		144.8	-0.7153	-0.0007153	144.8	-0.6606	-0.0006606	144.8	-0.6418	-0.0006418	144.8	-0.6383	-0.0006383	144.8	-0.633	-0.000633	144.8	-0.6286	-0.0006286		144.8	-0.7153	-0.0007153	144.8	-0.6263	-0.0006263	144.8	-0.6378	-0.0006378	144.8	-0.636
	145.4	-0.7153	-0.0007153	145.4	-0.6448	-0.0006448	145.4	-0.6367	-0.0006367	145.4	-0.6117	-0.0006117	145.4	-0.6029	-0.0006029	145.4	-0.5865	-0.0005865		145.4	-0.7153	-0.0007153	145.4	-0.6606	-0.0006606	145.4	-0.6418	-0.0006418	145.4	-0.6383	-0.0006383	145.4	-0.633	-0.000633	145.4	-0.6286	-0.0006286		145.4	-0.7153	-0.0007153	145.4	-0.6263	-0.0006263	145.4	-0.6378	-0.0006378	145.4	-0.636
	145.9	-0.7152	-0.0007152	145.9	-0.6448	-0.0006448	145.9	-0.6367	-0.0006367	145.9	-0.6117	-0.0006117	145.9	-0.6029	-0.0006029	145.9	-0.5866	-0.0005866		145.9	-0.7152	-0.0007152	145.9	-0.6606	-0.0006606	145.9	-0.6418	-0.0006418	145.9	-0.6383	-0.0006383	145.9	-0.633	-0.000633	145.9	-0.6287	-0.0006287		145.9	-0.7152	-0.0007152	145.9	-0.6264	-0.0006264	145.9	-0.6378	-0.0006378	145.9	-0.6361
	146.4	-0.7152	-0.0007152	146.4	-0.6448	-0.0006448	146.4	-0.6367	-0.0006367	146.4	-0.6117	-0.0006117	146.4	-0.603	-0.000603	146.4	-0.5867	-0.0005867		146.4	-0.7152	-0.0007152	146.4	-0.6606	-0.0006606	146.4	-0.6418	-0.0006418	146.4	-0.6383	-0.0006383	146.4	-0.633	-0.000633	146.4	-0.6287	-0.0006287		146.4	-0.7152	-0.0007152	146.4	-0.6265	-0.0006265	146.4	-0.6378	-0.0006378	146.4	-0.6361
	146.9	-0.7152	-0.0007152	146.9	-0.6449	-0.0006449	146.9	-0.6367	-0.0006367	146.9	-0.6118	-0.0006118	146.9	-0.603	-0.000603	146.9	-0.5867	-0.0005867		146.9	-0.7152	-0.0007152	146.9	-0.6606	-0.0006606	146.9	-0.6418	-0.0006418	146.9	-0.6383	-0.0006383	146.9	-0.633	-0.000633	146.9	-0.6287	-0.0006287		146.9	-0.7152	-0.0007152	146.9	-0.6266	-0.0006266	146.9	-0.6378	-0.0006378	146.9	-0.6361
	147.4	-0.7151	-0.0007151	147.4	-0.6449	-0.0006449	147.4	-0.6367	-0.0006367	147.4	-0.6118	-0.0006118	147.4	-0.6031	-0.0006031	147.4	-0.5868	-0.0005868		147.4	-0.7151	-0.0007151	147.4	-0.6606	-0.0006606	147.4	-0.6419	-0.0006419	147.4	-0.6383	-0.0006383	147.4	-0.6331	-0.0006331	147.4	-0.6287	-0.0006287		147.4	-0.7151	-0.0007151	147.4	-0.6267	-0.0006267	147.4	-0.6378	-0.0006378	147.4	-0.6361
	147.9	-0.7151	-0.0007151	147.9	-0.6449	-0.0006449	147.9	-0.6367	-0.0006367	147.9	-0.6118	-0.0006118	147.9	-0.6031	-0.0006031	147.9	-0.5869	-0.0005869		147.9	-0.7151	-0.0007151	147.9	-0.6606	-0.0006606	147.9	-0.6419	-0.0006419	147.9	-0.6383	-0.0006383	147.9	-0.6331	-0.0006331	147.9	-0.6287	-0.0006287		147.9	-0.7151	-0.0007151	147.9	-0.6267	-0.0006267	147.9	-0.6378	-0.0006378	147.9	-0.6361
	148.4	-0.7151	-0.0007151	148.4	-0.6449	-0.0006449	148.4	-0.6368	-0.0006368	148.4	-0.6119	-0.0006119	148.4	-0.6032	-0.0006032	148.4	-0.5869	-0.0005869		148.4	-0.7151	-0.0007151	148.4	-0.6605	-0.0006605	148.4	-0.6419	-0.0006419	148.4	-0.6383	-0.0006383	148.4	-0.6331	-0.0006331	148.4	-0.6287	-0.0006287		148.4	-0.7151	-0.0007151	148.4	-0.6268	-0.0006268	148.4	-0.6378	-0.0006378	148.4	-0.6361
	148.9	-0.7151	-0.0007151	148.9	-0.6449	-0.0006449	148.9	-0.6368	-0.0006368	148.9	-0.6119	-0.0006119	148.9	-0.6032	-0.0006032	148.9	-0.587	-0.000587		148.9	-0.7151	-0.0007151	148.9	-0.6605	-0.0006605	148.9	-0.6419	-0.0006419	148.9	-0.6383	-0.0006383	148.9	-0.6331	-0.0006331	148.9	-0.6287	-0.0006287		148.9	-0.7151	-0.0007151	148.9	-0.6269	-0.0006269	148.9	-0.6378	-0.0006378	148.9	-0.6361
	149.4	-0.715	-0.000715	149.4	-0.645	-0.000645	149.4	-0.6368	-0.0006368	149.4	-0.6119	-0.0006119	149.4	-0.6033	-0.0006033	149.4	-0.587	-0.000587		149.4	-0.715	-0.000715	149.4	-0.6605	-0.0006605	149.4	-0.6419	-0.0006419	149.4	-0.6383	-0.0006383	149.4	-0.633	-0.000633	149.4	-0.6287	-0.0006287		149.4	-0.715	-0.000715	149.4	-0.6269	-0.0006269	149.4	-0.6378	-0.0006378	149.4	-0.6361
	149.9	-0.715	-0.000715	149.9	-0.645	-0.000645	149.9	-0.6368	-0.0006368	149.9	-0.612	-0.000612	149.9	-0.6034	-0.0006034	149.9	-0.5871	-0.0005871		149.9	-0.715	-0.000715	149.9	-0.6604	-0.0006604	149.9	-0.6419	-0.0006419	149.9	-0.6383	-0.0006383	149.9	-0.633	-0.000633	149.9	-0.6287	-0.0006287		149.9	-0.715	-0.000715	149.9	-0.627	-0.000627	149.9	-0.6378	-0.0006378	149.9	-0.6361
	150.4	-0.715	-0.000715	150.4	-0.645	-0.000645	150.4	-0.6368	-0.0006368	150.4	-0.612	-0.000612	150.4	-0.6034	-0.0006034	150.4	-0.5871	-0.0005871		150.4	-0.715	-0.000715	150.4	-0.6604	-0.0006604	150.4	-0.6419	-0.0006419	150.4	-0.6383	-0.0006383	150.4	-0.633	-0.000633	150.4	-0.6287	-0.0006287		150.4	-0.715	-0.000715	150.4	-0.627	-0.000627	150.4	-0.6378	-0.0006378	150.4	-0.6361
	151	-0.7149	-0.0007149	151	-0.645	-0.000645	151	-0.6368	-0.0006368	151	-0.6121	-0.0006121	151	-0.6035	-0.0006035	151	-0.5872	-0.0005872		151	-0.7149	-0.0007149	151	-0.6604	-0.0006604	151	-0.6419	-0.0006419	151	-0.6383	-0.0006383	151	-0.633	-0.000633	151	-0.6287	-0.0006287		151	-0.7149	-0.0007149	151	-0.6271	-0.0006271	151	-0.6378	-0.0006378	151	-0.6361
	151.5	-0.7149	-0.0007149	151.5	-0.6451	-0.0006451	151.5	-0.6369	-0.0006369	151.5	-0.6121	-0.0006121	151.5	-0.6035	-0.0006035	151.5	-0.5872	-0.0005872		151.5	-0.7149	-0.0007149	151.5	-0.6604	-0.0006604	151.5	-0.6419	-0.0006419	151.5	-0.6382	-0.0006382	151.5	-0.633	-0.000633	151.5	-0.6287	-0.0006287		151.5	-0.7149	-0.0007149	151.5	-0.6272	-0.0006272	151.5	-0.6378	-0.0006378	151.5	-0.6361
	152	-0.7149	-0.0007149	152	-0.6451	-0.0006451	152	-0.6369	-0.0006369	152	-0.6121	-0.0006121	152	-0.6036	-0.0006036	152	-0.5873	-0.0005873		152	-0.7149	-0.0007149	152	-0.6604	-0.0006604	152	-0.6419	-0.0006419	152	-0.6382	-0.0006382	152	-0.633	-0.000633	152	-0.6287	-0.0006287		152	-0.7149	-0.0007149	152	-0.6273	-0.0006273	152	-0.6378	-0.0006378	152	-0.6361
	152.5	-0.7149	-0.0007149	152.5	-0.6451	-0.0006451	152.5	-0.6369	-0.0006369	152.5	-0.6121	-0.0006121	152.5	-0.6036	-0.0006036	152.5	-0.5874	-0.0005874		152.5	-0.7149	-0.0007149	152.5	-0.6603	-0.0006603	152.5	-0.642	-0.000642	152.5	-0.6382	-0.0006382	152.5	-0.633	-0.000633	152.5	-0.6287	-0.0006287		152.5	-0.7149	-0.0007149	152.5	-0.6274	-0.0006274	152.5	-0.6378	-0.0006378	152.5	-0.6361
	153	-0.7148	-0.0007148	153	-0.6451	-0.0006451	153	-0.6369	-0.0006369	153	-0.6121	-0.0006121	153	-0.6037	-0.0006037	153	-0.5874	-0.0005874		153	-0.7148	-0.0007148	153	-0.6603	-0.0006603	153	-0.642	-0.000642	153	-0.6382	-0.0006382	153	-0.633	-0.000633	153	-0.6287	-0.0006287		153	-0.7148	-0.0007148	153	-0.6275	-0.0006275	153	-0.6378	-0.0006378	153	-0.636
	153.5	-0.7148	-0.0007148	153.5	-0.6451	-0.0006451	153.5	-0.6369	-0.0006369	153.5	-0.6121	-0.0006121	153.5	-0.6037	-0.0006037	153.5	-0.5875	-0.0005875		153.5	-0.7148	-0.0007148	153.5	-0.6603	-0.0006603	153.5	-0.642	-0.000642	153.5	-0.6382	-0.0006382	153.5	-0.633	-0.000633	153.5	-0.6287	-0.0006287		153.5	-0.7148	-0.0007148	153.5	-0.6275	-0.0006275	153.5	-0.6378	-0.0006378	153.5	-0.636
	154	-0.7148	-0.0007148	154	-0.6452	-0.0006452	154	-0.6369	-0.0006369	154	-0.6121	-0.0006121	154	-0.6038	-0.0006038	154	-0.5875	-0.0005875		154	-0.7148	-0.0007148	154	-0.6603	-0.0006603	154	-0.642	-0.000642	154	-0.6382	-0.0006382	154	-0.633	-0.000633	154	-0.6287	-0.0006287		154	-0.7148	-0.0007148	154	-0.6276	-0.0006276	154	-0.6378	-0.0006378	154	-0.636
	154.5	-0.7147	-0.0007147	154.5	-0.6452	-0.0006452	154.5	-0.637	-0.000637	154.5	-0.6121	-0.0006121	154.5	-0.6038	-0.0006038	154.5	-0.5876	-0.0005876		154.5	-0.7147	-0.0007147	154.5	-0.6603	-0.0006603	154.5	-0.642	-0.000642	154.5	-0.6382	-0.0006382	154.5	-0.633	-0.000633	154.5	-0.6287	-0.0006287		154.5	-0.7147	-0.0007147	154.5	-0.6277	-0.0006277	154.5	-0.6378	-0.0006378	154.5	-0.636
	155	-0.7147	-0.0007147	155	-0.6452	-0.0006452	155	-0.637	-0.000637	155	-0.6122	-0.0006122	155	-0.6039	-0.0006039	155	-0.5876	-0.0005876		155	-0.7147	-0.0007147	155	-0.6603	-0.0006603	155	-0.642	-0.000642	155	-0.6382	-0.0006382	155	-0.633	-0.000633	155	-0.6287	-0.0006287		155	-0.7147	-0.0007147	155	-0.6277	-0.0006277	155	-0.6378	-0.0006378	155	-0.636
	155.6	-0.7147	-0.0007147	155.6	-0.6452	-0.0006452	155.6	-0.637	-0.000637	155.6	-0.6122	-0.0006122	155.6	-0.6039	-0.0006039	155.6	-0.5877	-0.0005877		155.6	-0.7147	-0.0007147	155.6	-0.6603	-0.0006603	155.6	-0.642	-0.000642	155.6	-0.6382	-0.0006382	155.6	-0.633	-0.000633	155.6	-0.6287	-0.0006287		155.6	-0.7147	-0.0007147	155.6	-0.6278	-0.0006278	155.6	-0.6378	-0.0006378	155.6	-0.636
	156.1	-0.7147	-0.0007147	156.1	-0.6452	-0.0006452	156.1	-0.637	-0.000637	156.1	-0.6122	-0.0006122	156.1	-0.604	-0.000604	156.1	-0.5877	-0.0005877		156.1	-0.7147	-0.0007147	156.1	-0.6603	-0.0006603	156.1	-0.642	-0.000642	156.1	-0.6382	-0.0006382	156.1	-0.6331	-0.0006331	156.1	-0.6287	-0.0006287		156.1	-0.7147	-0.0007147	156.1	-0.6279	-0.0006279	156.1	-0.6378	-0.0006378	156.1	-0.636
	156.6	-0.7147	-0.0007147	156.6	-0.6453	-0.0006453	156.6	-0.637	-0.000637	156.6	-0.6122	-0.0006122	156.6	-0.604	-0.000604	156.6	-0.5878	-0.0005878		156.6	-0.7147	-0.0007147	156.6	-0.6603	-0.0006603	156.6	-0.6421	-0.0006421	156.6	-0.6382	-0.0006382	156.6	-0.6331	-0.0006331	156.6	-0.6287	-0.0006287		156.6	-0.7147	-0.0007147	156.6	-0.6279	-0.0006279	156.6	-0.6378	-0.0006378	156.6	-0.6359
	157.1	-0.7147	-0.0007147	157.1	-0.6453	-0.0006453	157.1	-0.637	-0.000637	157.1	-0.6122	-0.0006122	157.1	-0.6041	-0.0006041	157.1	-0.5878	-0.0005878		157.1	-0.7147	-0.0007147	157.1	-0.6603	-0.0006603	157.1	-0.6421	-0.0006421	157.1	-0.6382	-0.0006382	157.1	-0.6331	-0.0006331	157.1	-0.6286	-0.0006286		157.1	-0.7147	-0.0007147	157.1	-0.628	-0.000628	157.1	-0.6378	-0.0006378	157.1	-0.6359
	157.6	-0.7147	-0.0007147	157.6	-0.6453	-0.0006453	157.6	-0.6371	-0.0006371	157.6	-0.6122	-0.0006122	157.6	-0.6041	-0.0006041	157.6	-0.5879	-0.0005879		157.6	-0.7147	-0.0007147	157.6	-0.6602	-0.0006602	157.6	-0.6421	-0.0006421	157.6	-0.6382	-0.0006382	157.6	-0.6331	-0.0006331	157.6	-0.6286	-0.0006286		157.6	-0.7147	-0.0007147	157.6	-0.6281	-0.0006281	157.6	-0.6378	-0.0006378	157.6	-0.6359
	158.1	-0.7147	-0.0007147	158.1	-0.6453	-0.0006453	158.1	-0.6371	-0.0006371	158.1	-0.6122	-0.0006122	158.1	-0.6042	-0.0006042	158.1	-0.5879	-0.0005879		158.1	-0.7147	-0.0007147	158.1	-0.6602	-0.0006602	158.1	-0.6421	-0.0006421	158.1	-0.6382	-0.0006382	158.1	-0.6331	-0.0006331	158.1	-0.6286	-0.0006286		158.1	-0.7147	-0.0007147	158.1	-0.6281	-0.0006281	158.1	-0.6378	-0.0006378	158.1	-0.6359
	158.6	-0.7147	-0.0007147	158.6	-0.6453	-0.0006453	158.6	-0.6371	-0.0006371	158.6	-0.6122	-0.0006122	158.6	-0.6042	-0.0006042	158.6	-0.5879	-0.0005879		158.6	-0.7147	-0.0007147	158.6	-0.6602	-0.0006602	158.6	-0.6421	-0.0006421	158.6	-0.6382	-0.0006382	158.6	-0.6331	-0.0006331	158.6	-0.6287	-0.0006287		158.6	-0.7147	-0.0007147	158.6	-0.6282	-0.0006282	158.6	-0.6379	-0.0006379	158.6	-0.6359
	159.1	-0.7146	-0.0007146	159.1	-0.6453	-0.0006453	159.1	-0.6371	-0.0006371	159.1	-0.6123	-0.0006123	159.1	-0.6042	-0.0006042	159.1	-0.588	-0.000588		159.1	-0.7146	-0.0007146	159.1	-0.6602	-0.0006602	159.1	-0.6421	-0.0006421	159.1	-0.6382	-0.0006382	159.1	-0.6331	-0.0006331	159.1	-0.6287	-0.0006287		159.1	-0.7146	-0.0007146	159.1	-0.6283	-0.0006283	159.1	-0.6379	-0.0006379	159.1	-0.6358
	159.6	-0.7146	-0.0007146	159.6	-0.6453	-0.0006453	159.6	-0.6371	-0.0006371	159.6	-0.6124	-0.0006124	159.6	-0.6043	-0.0006043	159.6	-0.588	-0.000588		159.6	-0.7146	-0.0007146	159.6	-0.6602	-0.0006602	159.6	-0.6421	-0.0006421	159.6	-0.6382	-0.0006382	159.6	-0.6331	-0.0006331	159.6	-0.6287	-0.0006287		159.6	-0.7146	-0.0007146	159.6	-0.6284	-0.0006284	159.6	-0.6379	-0.0006379	159.6	-0.6358
	160.1	-0.7146	-0.0007146	160.1	-0.6454	-0.0006454	160.1	-0.6371	-0.0006371	160.1	-0.6124	-0.0006124	160.1	-0.6043	-0.0006043	160.1	-0.5881	-0.0005881		160.1	-0.7146	-0.0007146	160.1	-0.6602	-0.0006602	160.1	-0.6421	-0.0006421	160.1	-0.6382	-0.0006382	160.1	-0.6331	-0.0006331	160.1	-0.6287	-0.0006287		160.1	-0.7146	-0.0007146	160.1	-0.6285	-0.0006285	160.1	-0.6379	-0.0006379	160.1	-0.6358
	160.6	-0.7145	-0.0007145	160.6	-0.6454	-0.0006454	160.6	-0.6372	-0.0006372	160.6	-0.6125	-0.0006125	160.6	-0.6044	-0.0006044	160.6	-0.5881	-0.0005881		160.6	-0.7145	-0.0007145	160.6	-0.6602	-0.0006602	160.6	-0.6421	-0.0006421	160.6	-0.6382	-0.0006382	160.6	-0.6331	-0.0006331	160.6	-0.6287	-0.0006287		160.6	-0.7145	-0.0007145	160.6	-0.6285	-0.0006285	160.6	-0.6379	-0.0006379	160.6	-0.6357
	161.2	-0.7144	-0.0007144	161.2	-0.6454	-0.0006454	161.2	-0.6372	-0.0006372	161.2	-0.6125	-0.0006125	161.2	-0.6044	-0.0006044	161.2	-0.5882	-0.0005882		161.2	-0.7144	-0.0007144	161.2	-0.6602	-0.0006602	161.2	-0.6421	-0.0006421	161.2	-0.6381	-0.0006381	161.2	-0.6331	-0.0006331	161.2	-0.6287	-0.0006287		161.2	-0.7144	-0.0007144	161.2	-0.6286	-0.0006286	161.2	-0.6379	-0.0006379	161.2	-0.6357
	161.7	-0.7144	-0.0007144	161.7	-0.6454	-0.0006454	161.7	-0.6372	-0.0006372	161.7	-0.6125	-0.0006125	161.7	-0.6045	-0.0006045	161.7	-0.5882	-0.0005882		161.7	-0.7144	-0.0007144	161.7	-0.6602	-0.0006602	161.7	-0.6421	-0.0006421	161.7	-0.6381	-0.0006381	161.7	-0.6331	-0.0006331	161.7	-0.6287	-0.0006287		161.7	-0.7144	-0.0007144	161.7	-0.6286	-0.0006286	161.7	-0.6379	-0.0006379	161.7	-0.6357
	162.2	-0.7143	-0.0007143	162.2	-0.6454	-0.0006454	162.2	-0.6372	-0.0006372	162.2	-0.6125	-0.0006125	162.2	-0.6045	-0.0006045	162.2	-0.5883	-0.0005883		162.2	-0.7143	-0.0007143	162.2	-0.6602	-0.0006602	162.2	-0.6422	-0.0006422	162.2	-0.6381	-0.0006381	162.2	-0.6331	-0.0006331	162.2	-0.6287	-0.0006287		162.2	-0.7143	-0.0007143	162.2	-0.6287	-0.0006287	162.2	-0.6379	-0.0006379	162.2	-0.6357
	162.7	-0.7143	-0.0007143	162.7	-0.6454	-0.0006454	162.7	-0.6372	-0.0006372	162.7	-0.6124	-0.0006124	162.7	-0.6046	-0.0006046	162.7	-0.5883	-0.0005883		162.7	-0.7143	-0.0007143	162.7	-0.6601	-0.0006601	162.7	-0.6422	-0.0006422	162.7	-0.6381	-0.0006381	162.7	-0.6331	-0.0006331	162.7	-0.6287	-0.0006287		162.7	-0.7143	-0.0007143	162.7	-0.6288	-0.0006288	162.7	-0.6379	-0.0006379	162.7	-0.6356
	163.2	-0.7142	-0.0007142	163.2	-0.6454	-0.0006454	163.2	-0.6372	-0.0006372	163.2	-0.6124	-0.0006124	163.2	-0.6046	-0.0006046	163.2	-0.5884	-0.0005884		163.2	-0.7142	-0.0007142	163.2	-0.6601	-0.0006601	163.2	-0.6422	-0.0006422	163.2	-0.6381	-0.0006381	163.2	-0.6331	-0.0006331	163.2	-0.6287	-0.0006287		163.2	-0.7142	-0.0007142	163.2	-0.6289	-0.0006289	163.2	-0.6379	-0.0006379	163.2	-0.6356
	163.7	-0.7142	-0.0007142	163.7	-0.6455	-0.0006455	163.7	-0.6372	-0.0006372	163.7	-0.6124	-0.0006124	163.7	-0.6047	-0.0006047	163.7	-0.5884	-0.0005884		163.7	-0.7142	-0.0007142	163.7	-0.6601	-0.0006601	163.7	-0.6422	-0.0006422	163.7	-0.6381	-0.0006381	163.7	-0.6331	-0.0006331	163.7	-0.6287	-0.0006287		163.7	-0.7142	-0.0007142	163.7	-0.629	-0.000629	163.7	-0.6379	-0.0006379	163.7	-0.6356
	164.2	-0.7142	-0.0007142	164.2	-0.6455	-0.0006455	164.2	-0.6373	-0.0006373	164.2	-0.6124	-0.0006124	164.2	-0.6047	-0.0006047	164.2	-0.5885	-0.0005885		164.2	-0.7142	-0.0007142	164.2	-0.6601	-0.0006601	164.2	-0.6422	-0.0006422	164.2	-0.6381	-0.0006381	164.2	-0.6331	-0.0006331	164.2	-0.6287	-0.0006287		164.2	-0.7142	-0.0007142	164.2	-0.629	-0.000629	164.2	-0.6379	-0.0006379	164.2	-0.6355
	164.7	-0.7142	-0.0007142	164.7	-0.6455	-0.0006455	164.7	-0.6373	-0.0006373	164.7	-0.6125	-0.0006125	164.7	-0.6047	-0.0006047	164.7	-0.5885	-0.0005885		164.7	-0.7142	-0.0007142	164.7	-0.6601	-0.0006601	164.7	-0.6422	-0.0006422	164.7	-0.6381	-0.0006381	164.7	-0.6331	-0.0006331	164.7	-0.6287	-0.0006287		164.7	-0.7142	-0.0007142	164.7	-0.6291	-0.0006291	164.7	-0.6379	-0.0006379	164.7	-0.6355
	165.2	-0.7142	-0.0007142	165.2	-0.6455	-0.0006455	165.2	-0.6373	-0.0006373	165.2	-0.6125	-0.0006125	165.2	-0.6048	-0.0006048	165.2	-0.5886	-0.0005886		165.2	-0.7142	-0.0007142	165.2	-0.6601	-0.0006601	165.2	-0.6422	-0.0006422	165.2	-0.6381	-0.0006381	165.2	-0.6331	-0.0006331	165.2	-0.6287	-0.0006287		165.2	-0.7142	-0.0007142	165.2	-0.6292	-0.0006292	165.2	-0.6379	-0.0006379	165.2	-0.6355
	165.8	-0.7141	-0.0007141	165.8	-0.6455	-0.0006455	165.8	-0.6373	-0.0006373	165.8	-0.6126	-0.0006126	165.8	-0.6048	-0.0006048	165.8	-0.5886	-0.0005886		165.8	-0.7141	-0.0007141	165.8	-0.66	-0.00066	165.8	-0.6422	-0.0006422	165.8	-0.6381	-0.0006381	165.8	-0.6331	-0.0006331	165.8	-0.6287	-0.0006287		165.8	-0.7141	-0.0007141	165.8	-0.6292	-0.0006292	165.8	-0.6378	-0.0006378	165.8	-0.6354
	166.3	-0.7141	-0.0007141	166.3	-0.6455	-0.0006455	166.3	-0.6373	-0.0006373	166.3	-0.6127	-0.0006127	166.3	-0.6049	-0.0006049	166.3	-0.5886	-0.0005886		166.3	-0.7141	-0.0007141	166.3	-0.66	-0.00066	166.3	-0.6422	-0.0006422	166.3	-0.6381	-0.0006381	166.3	-0.6331	-0.0006331	166.3	-0.6287	-0.0006287		166.3	-0.7141	-0.0007141	166.3	-0.6293	-0.0006293	166.3	-0.6378	-0.0006378	166.3	-0.6354
	166.8	-0.7141	-0.0007141	166.8	-0.6455	-0.0006455	166.8	-0.6373	-0.0006373	166.8	-0.6127	-0.0006127	166.8	-0.6049	-0.0006049	166.8	-0.5887	-0.0005887		166.8	-0.7141	-0.0007141	166.8	-0.66	-0.00066	166.8	-0.6422	-0.0006422	166.8	-0.6381	-0.0006381	166.8	-0.6331	-0.0006331	166.8	-0.6287	-0.0006287		166.8	-0.7141	-0.0007141	166.8	-0.6294	-0.0006294	166.8	-0.6378	-0.0006378	166.8	-0.6354
	167.3	-0.7141	-0.0007141	167.3	-0.6456	-0.0006456	167.3	-0.6374	-0.0006374	167.3	-0.6127	-0.0006127	167.3	-0.605	-0.000605	167.3	-0.5887	-0.0005887		167.3	-0.7141	-0.0007141	167.3	-0.66	-0.00066	167.3	-0.6422	-0.0006422	167.3	-0.6381	-0.0006381	167.3	-0.6331	-0.0006331	167.3	-0.6287	-0.0006287		167.3	-0.7141	-0.0007141	167.3	-0.6294	-0.0006294	167.3	-0.6378	-0.0006378	167.3	-0.6353
	167.8	-0.7141	-0.0007141	167.8	-0.6456	-0.0006456	167.8	-0.6374	-0.0006374	167.8	-0.6127	-0.0006127	167.8	-0.605	-0.000605	167.8	-0.5888	-0.0005888		167.8	-0.7141	-0.0007141	167.8	-0.66	-0.00066	167.8	-0.6422	-0.0006422	167.8	-0.6381	-0.0006381	167.8	-0.6331	-0.0006331	167.8	-0.6287	-0.0006287		167.8	-0.7141	-0.0007141	167.8	-0.6295	-0.0006295	167.8	-0.6378	-0.0006378	167.8	-0.6353
	168.3	-0.714	-0.000714	168.3	-0.6456	-0.0006456	168.3	-0.6374	-0.0006374	168.3	-0.6127	-0.0006127	168.3	-0.6051	-0.0006051	168.3	-0.5888	-0.0005888		168.3	-0.714	-0.000714	168.3	-0.66	-0.00066	168.3	-0.6422	-0.0006422	168.3	-0.6381	-0.0006381	168.3	-0.6331	-0.0006331	168.3	-0.6287	-0.0006287		168.3	-0.714	-0.000714	168.3	-0.6296	-0.0006296	168.3	-0.6378	-0.0006378	168.3	-0.6353
	168.8	-0.714	-0.000714	168.8	-0.6456	-0.0006456	168.8	-0.6374	-0.0006374	168.8	-0.6127	-0.0006127	168.8	-0.6051	-0.0006051	168.8	-0.5888	-0.0005888		168.8	-0.714	-0.000714	168.8	-0.66	-0.00066	168.8	-0.6422	-0.0006422	168.8	-0.6381	-0.0006381	168.8	-0.6331	-0.0006331	168.8	-0.6287	-0.0006287		168.8	-0.714	-0.000714	168.8	-0.6297	-0.0006297	168.8	-0.6378	-0.0006378	168.8	-0.6352
	169.3	-0.714	-0.000714	169.3	-0.6457	-0.0006457	169.3	-0.6374	-0.0006374	169.3	-0.6127	-0.0006127	169.3	-0.6051	-0.0006051	169.3	-0.5889	-0.0005889		169.3	-0.714	-0.000714	169.3	-0.66	-0.00066	169.3	-0.6423	-0.0006423	169.3	-0.6381	-0.0006381	169.3	-0.6331	-0.0006331	169.3	-0.6287	-0.0006287		169.3	-0.714	-0.000714	169.3	-0.6297	-0.0006297	169.3	-0.6379	-0.0006379	169.3	-0.6352
	169.8	-0.714	-0.000714	169.8	-0.6457	-0.0006457	169.8	-0.6374	-0.0006374	169.8	-0.6127	-0.0006127	169.8	-0.6052	-0.0006052	169.8	-0.5889	-0.0005889		169.8	-0.714	-0.000714	169.8	-0.66	-0.00066	169.8	-0.6423	-0.0006423	169.8	-0.638	-0.000638	169.8	-0.6331	-0.0006331	169.8	-0.6287	-0.0006287		169.8	-0.714	-0.000714	169.8	-0.6298	-0.0006298	169.8	-0.638	-0.000638	169.8	-0.6351
	170.3	-0.7139	-0.0007139	170.3	-0.6457	-0.0006457	170.3	-0.6374	-0.0006374	170.3	-0.6127	-0.0006127	170.3	-0.6052	-0.0006052	170.3	-0.589	-0.000589		170.3	-0.7139	-0.0007139	170.3	-0.66	-0.00066	170.3	-0.6423	-0.0006423	170.3	-0.638	-0.000638	170.3	-0.6331	-0.0006331	170.3	-0.6287	-0.0006287		170.3	-0.7139	-0.0007139	170.3	-0.6299	-0.0006299	170.3	-0.638	-0.000638	170.3	-0.6351
	170.9	-0.7139	-0.0007139	170.9	-0.6458	-0.0006458	170.9	-0.6375	-0.0006375	170.9	-0.6127	-0.0006127	170.9	-0.6053	-0.0006053	170.9	-0.589	-0.000589		170.9	-0.7139	-0.0007139	170.9	-0.66	-0.00066	170.9	-0.6423	-0.0006423	170.9	-0.638	-0.000638	170.9	-0.6331	-0.0006331	170.9	-0.6287	-0.0006287		170.9	-0.7139	-0.0007139	170.9	-0.6299	-0.0006299	170.9	-0.6381	-0.0006381	170.9	-0.6351
	171.4	-0.7139	-0.0007139	171.4	-0.6458	-0.0006458	171.4	-0.6375	-0.0006375	171.4	-0.6127	-0.0006127	171.4	-0.6053	-0.0006053	171.4	-0.589	-0.000589		171.4	-0.7139	-0.0007139	171.4	-0.66	-0.00066	171.4	-0.6423	-0.0006423	171.4	-0.638	-0.000638	171.4	-0.6331	-0.0006331	171.4	-0.6287	-0.0006287		171.4	-0.7139	-0.0007139	171.4	-0.63	-0.00063	171.4	-0.6382	-0.0006382	171.4	-0.635
	171.9	-0.7138	-0.0007138	171.9	-0.6458	-0.0006458	171.9	-0.6375	-0.0006375	171.9	-0.6127	-0.0006127	171.9	-0.6053	-0.0006053	171.9	-0.5891	-0.0005891		171.9	-0.7138	-0.0007138	171.9	-0.66	-0.00066	171.9	-0.6423	-0.0006423	171.9	-0.638	-0.000638	171.9	-0.6331	-0.0006331	171.9	-0.6287	-0.0006287		171.9	-0.7138	-0.0007138	171.9	-0.63	-0.00063	171.9	-0.6382	-0.0006382	171.9	-0.635
	172.4	-0.7138	-0.0007138	172.4	-0.6458	-0.0006458	172.4	-0.6375	-0.0006375	172.4	-0.6127	-0.0006127	172.4	-0.6054	-0.0006054	172.4	-0.5891	-0.0005891		172.4	-0.7138	-0.0007138	172.4	-0.66	-0.00066	172.4	-0.6423	-0.0006423	172.4	-0.638	-0.000638	172.4	-0.6331	-0.0006331	172.4	-0.6287	-0.0006287		172.4	-0.7138	-0.0007138	172.4	-0.6301	-0.0006301	172.4	-0.6382	-0.0006382	172.4	-0.635
	172.9	-0.7137	-0.0007137	172.9	-0.6458	-0.0006458	172.9	-0.6375	-0.0006375	172.9	-0.6127	-0.0006127	172.9	-0.6054	-0.0006054	172.9	-0.5891	-0.0005891		172.9	-0.7137	-0.0007137	172.9	-0.66	-0.00066	172.9	-0.6423	-0.0006423	172.9	-0.638	-0.000638	172.9	-0.6331	-0.0006331	172.9	-0.6287	-0.0006287		172.9	-0.7137	-0.0007137	172.9	-0.6302	-0.0006302	172.9	-0.6382	-0.0006382	172.9	-0.6349
	173.4	-0.7137	-0.0007137	173.4	-0.6459	-0.0006459	173.4	-0.6375	-0.0006375	173.4	-0.6127	-0.0006127	173.4	-0.6054	-0.0006054	173.4	-0.5892	-0.0005892		173.4	-0.7137	-0.0007137	173.4	-0.66	-0.00066	173.4	-0.6423	-0.0006423	173.4	-0.638	-0.000638	173.4	-0.6331	-0.0006331	173.4	-0.6287	-0.0006287		173.4	-0.7137	-0.0007137	173.4	-0.6303	-0.0006303	173.4	-0.6382	-0.0006382	173.4	-0.6349
	173.9	-0.7136	-0.0007136	173.9	-0.6459	-0.0006459	173.9	-0.6375	-0.0006375	173.9	-0.6128	-0.0006128	173.9	-0.6055	-0.0006055	173.9	-0.5892	-0.0005892		173.9	-0.7136	-0.0007136	173.9	-0.66	-0.00066	173.9	-0.6423	-0.0006423	173.9	-0.638	-0.000638	173.9	-0.6331	-0.0006331	173.9	-0.6287	-0.0006287		173.9	-0.7136	-0.0007136	173.9	-0.6303	-0.0006303	173.9	-0.6381	-0.0006381	173.9	-0.6349
	174.4	-0.7136	-0.0007136	174.4	-0.6459	-0.0006459	174.4	-0.6375	-0.0006375	174.4	-0.6128	-0.0006128	174.4	-0.6055	-0.0006055	174.4	-0.5893	-0.0005893		174.4	-0.7136	-0.0007136	174.4	-0.66	-0.00066	174.4	-0.6423	-0.0006423	174.4	-0.638	-0.000638	174.4	-0.6331	-0.0006331	174.4	-0.6287	-0.0006287		174.4	-0.7136	-0.0007136	174.4	-0.6304	-0.0006304	174.4	-0.6381	-0.0006381	174.4	-0.6348
	174.9	-0.7136	-0.0007136	174.9	-0.646	-0.000646	174.9	-0.6376	-0.0006376	174.9	-0.6129	-0.0006129	174.9	-0.6056	-0.0006056	174.9	-0.5893	-0.0005893		174.9	-0.7136	-0.0007136	174.9	-0.66	-0.00066	174.9	-0.6423	-0.0006423	174.9	-0.638	-0.000638	174.9	-0.6331	-0.0006331	174.9	-0.6287	-0.0006287		174.9	-0.7136	-0.0007136	174.9	-0.6304	-0.0006304	174.9	-0.638	-0.000638	174.9	-0.6348
	175.4	-0.7136	-0.0007136	175.4	-0.646	-0.000646	175.4	-0.6376	-0.0006376	175.4	-0.6129	-0.0006129	175.4	-0.6056	-0.0006056	175.4	-0.5893	-0.0005893		175.4	-0.7136	-0.0007136	175.4	-0.6599	-0.0006599	175.4	-0.6424	-0.0006424	175.4	-0.638	-0.000638	175.4	-0.6331	-0.0006331	175.4	-0.6287	-0.0006287		175.4	-0.7136	-0.0007136	175.4	-0.6305	-0.0006305	175.4	-0.638	-0.000638	175.4	-0.6347
	175.9	-0.7136	-0.0007136	175.9	-0.646	-0.000646	175.9	-0.6376	-0.0006376	175.9	-0.6129	-0.0006129	175.9	-0.6056	-0.0006056	175.9	-0.5894	-0.0005894		175.9	-0.7136	-0.0007136	175.9	-0.6599	-0.0006599	175.9	-0.6424	-0.0006424	175.9	-0.638	-0.000638	175.9	-0.6331	-0.0006331	175.9	-0.6287	-0.0006287		175.9	-0.7136	-0.0007136	175.9	-0.6306	-0.0006306	175.9	-0.638	-0.000638	175.9	-0.6347
	176.5	-0.7135	-0.0007135	176.5	-0.6461	-0.0006461	176.5	-0.6376	-0.0006376	176.5	-0.6129	-0.0006129	176.5	-0.6057	-0.0006057	176.5	-0.5894	-0.0005894		176.5	-0.7135	-0.0007135	176.5	-0.6599	-0.0006599	176.5	-0.6424	-0.0006424	176.5	-0.638	-0.000638	176.5	-0.6331	-0.0006331	176.5	-0.6287	-0.0006287		176.5	-0.7135	-0.0007135	176.5	-0.6306	-0.0006306	176.5	-0.638	-0.000638	176.5	-0.6347
	177	-0.7135	-0.0007135	177	-0.6461	-0.0006461	177	-0.6376	-0.0006376	177	-0.613	-0.000613	177	-0.6057	-0.0006057	177	-0.5895	-0.0005895		177	-0.7135	-0.0007135	177	-0.6599	-0.0006599	177	-0.6424	-0.0006424	177	-0.638	-0.000638	177	-0.6331	-0.0006331	177	-0.6287	-0.0006287		177	-0.7135	-0.0007135	177	-0.6307	-0.0006307	177	-0.6379	-0.0006379	177	-0.6346
	177.5	-0.7135	-0.0007135	177.5	-0.6461	-0.0006461	177.5	-0.6376	-0.0006376	177.5	-0.613	-0.000613	177.5	-0.6058	-0.0006058	177.5	-0.5895	-0.0005895		177.5	-0.7135	-0.0007135	177.5	-0.6599	-0.0006599	177.5	-0.6424	-0.0006424	177.5	-0.638	-0.000638	177.5	-0.6331	-0.0006331	177.5	-0.6287	-0.0006287		177.5	-0.7135	-0.0007135	177.5	-0.6307	-0.0006307	177.5	-0.6379	-0.0006379	177.5	-0.6346
	178	-0.7135	-0.0007135	178	-0.6461	-0.0006461	178	-0.6376	-0.0006376	178	-0.613	-0.000613	178	-0.6058	-0.0006058	178	-0.5895	-0.0005895		178	-0.7135	-0.0007135	178	-0.6599	-0.0006599	178	-0.6424	-0.0006424	178	-0.638	-0.000638	178	-0.6331	-0.0006331	178	-0.6287	-0.0006287		178	-0.7135	-0.0007135	178	-0.6308	-0.0006308	178	-0.6379	-0.0006379	178	-0.6346
	178.5	-0.7135	-0.0007135	178.5	-0.6462	-0.0006462	178.5	-0.6377	-0.0006377	178.5	-0.613	-0.000613	178.5	-0.6058	-0.0006058	178.5	-0.5896	-0.0005896		178.5	-0.7135	-0.0007135	178.5	-0.6599	-0.0006599	178.5	-0.6424	-0.0006424	178.5	-0.6379	-0.0006379	178.5	-0.6331	-0.0006331	178.5	-0.6287	-0.0006287		178.5	-0.7135	-0.0007135	178.5	-0.6309	-0.0006309	178.5	-0.6379	-0.0006379	178.5	-0.6345
	179	-0.7134	-0.0007134	179	-0.6462	-0.0006462	179	-0.6377	-0.0006377	179	-0.613	-0.000613	179	-0.6059	-0.0006059	179	-0.5896	-0.0005896		179	-0.7134	-0.0007134	179	-0.6599	-0.0006599	179	-0.6424	-0.0006424	179	-0.6379	-0.0006379	179	-0.6331	-0.0006331	179	-0.6287	-0.0006287		179	-0.7134	-0.0007134	179	-0.6309	-0.0006309	179	-0.6379	-0.0006379	179	-0.6345
	179.5	-0.7134	-0.0007134	179.5	-0.6463	-0.0006463	179.5	-0.6377	-0.0006377	179.5	-0.6129	-0.0006129	179.5	-0.6059	-0.0006059	179.5	-0.5897	-0.0005897		179.5	-0.7134	-0.0007134	179.5	-0.6599	-0.0006599	179.5	-0.6424	-0.0006424	179.5	-0.6379	-0.0006379	179.5	-0.6331	-0.0006331	179.5	-0.6288	-0.0006288		179.5	-0.7134	-0.0007134	179.5	-0.631	-0.000631	179.5	-0.6379	-0.0006379	179.5	-0.6344
	180	-0.7134	-0.0007134	180	-0.6463	-0.0006463	180	-0.6377	-0.0006377	180	-0.6129	-0.0006129	180	-0.606	-0.000606	180	-0.5897	-0.0005897		180	-0.7134	-0.0007134	180	-0.6599	-0.0006599	180	-0.6424	-0.0006424	180	-0.6379	-0.0006379	180	-0.6331	-0.0006331	180	-0.6288	-0.0006288		180	-0.7134	-0.0007134	180	-0.6311	-0.0006311	180	-0.6379	-0.0006379	180	-0.6344
	180.5	-0.7133	-0.0007133	180.5	-0.6464	-0.0006464	180.5	-0.6377	-0.0006377	180.5	-0.613	-0.000613	180.5	-0.606	-0.000606	180.5	-0.5897	-0.0005897		180.5	-0.7133	-0.0007133	180.5	-0.6598	-0.0006598	180.5	-0.6424	-0.0006424	180.5	-0.6379	-0.0006379	180.5	-0.6331	-0.0006331	180.5	-0.6288	-0.0006288		180.5	-0.7133	-0.0007133	180.5	-0.6312	-0.0006312	180.5	-0.6379	-0.0006379	180.5	-0.6343
	181.1	-0.7133	-0.0007133	181.1	-0.6464	-0.0006464	181.1	-0.6377	-0.0006377	181.1	-0.613	-0.000613	181.1	-0.606	-0.000606	181.1	-0.5898	-0.0005898		181.1	-0.7133	-0.0007133	181.1	-0.6598	-0.0006598	181.1	-0.6424	-0.0006424	181.1	-0.6379	-0.0006379	181.1	-0.6331	-0.0006331	181.1	-0.6288	-0.0006288		181.1	-0.7133	-0.0007133	181.1	-0.6313	-0.0006313	181.1	-0.6379	-0.0006379	181.1	-0.6343
	181.6	-0.7133	-0.0007133	181.6	-0.6465	-0.0006465	181.6	-0.6377	-0.0006377	181.6	-0.613	-0.000613	181.6	-0.6061	-0.0006061	181.6	-0.5898	-0.0005898		181.6	-0.7133	-0.0007133	181.6	-0.6598	-0.0006598	181.6	-0.6424	-0.0006424	181.6	-0.6379	-0.0006379	181.6	-0.6331	-0.0006331	181.6	-0.6288	-0.0006288		181.6	-0.7133	-0.0007133	181.6	-0.6314	-0.0006314	181.6	-0.6379	-0.0006379	181.6	-0.6343
	182.1	-0.7132	-0.0007132	182.1	-0.6465	-0.0006465	182.1	-0.6377	-0.0006377	182.1	-0.613	-0.000613	182.1	-0.6061	-0.0006061	182.1	-0.5899	-0.0005899		182.1	-0.7132	-0.0007132	182.1	-0.6598	-0.0006598	182.1	-0.6425	-0.0006425	182.1	-0.6379	-0.0006379	182.1	-0.6331	-0.0006331	182.1	-0.6288	-0.0006288		182.1	-0.7132	-0.0007132	182.1	-0.6314	-0.0006314	182.1	-0.6379	-0.0006379	182.1	-0.6343
	182.6	-0.7132	-0.0007132	182.6	-0.6465	-0.0006465	182.6	-0.6378	-0.0006378	182.6	-0.6129	-0.0006129	182.6	-0.6061	-0.0006061	182.6	-0.5899	-0.0005899		182.6	-0.7132	-0.0007132	182.6	-0.6598	-0.0006598	182.6	-0.6425	-0.0006425	182.6	-0.6379	-0.0006379	182.6	-0.6331	-0.0006331	182.6	-0.6288	-0.0006288		182.6	-0.7132	-0.0007132	182.6	-0.6315	-0.0006315	182.6	-0.6379	-0.0006379	182.6	-0.6342
	183.1	-0.7132	-0.0007132	183.1	-0.6465	-0.0006465	183.1	-0.6378	-0.0006378	183.1	-0.6129	-0.0006129	183.1	-0.6062	-0.0006062	183.1	-0.59	-0.00059		183.1	-0.7132	-0.0007132	183.1	-0.6598	-0.0006598	183.1	-0.6425	-0.0006425	183.1	-0.6379	-0.0006379	183.1	-0.6331	-0.0006331	183.1	-0.6288	-0.0006288		183.1	-0.7132	-0.0007132	183.1	-0.6315	-0.0006315	183.1	-0.6379	-0.0006379	183.1	-0.6342
	183.6	-0.7131	-0.0007131	183.6	-0.6465	-0.0006465	183.6	-0.6378	-0.0006378	183.6	-0.6129	-0.0006129	183.6	-0.6062	-0.0006062	183.6	-0.59	-0.00059		183.6	-0.7131	-0.0007131	183.6	-0.6598	-0.0006598	183.6	-0.6425	-0.0006425	183.6	-0.6379	-0.0006379	183.6	-0.6331	-0.0006331	183.6	-0.6288	-0.0006288		183.6	-0.7131	-0.0007131	183.6	-0.6316	-0.0006316	183.6	-0.6379	-0.0006379	183.6	-0.6342
	184.1	-0.7131	-0.0007131	184.1	-0.6466	-0.0006466	184.1	-0.6378	-0.0006378	184.1	-0.6129	-0.0006129	184.1	-0.6062	-0.0006062	184.1	-0.59	-0.00059		184.1	-0.7131	-0.0007131	184.1	-0.6598	-0.0006598	184.1	-0.6425	-0.0006425	184.1	-0.6379	-0.0006379	184.1	-0.6331	-0.0006331	184.1	-0.6288	-0.0006288		184.1	-0.7131	-0.0007131	184.1	-0.6317	-0.0006317	184.1	-0.6379	-0.0006379	184.1	-0.6341
	184.6	-0.713	-0.000713	184.6	-0.6466	-0.0006466	184.6	-0.6378	-0.0006378	184.6	-0.613	-0.000613	184.6	-0.6063	-0.0006063	184.6	-0.5901	-0.0005901		184.6	-0.713	-0.000713	184.6	-0.6598	-0.0006598	184.6	-0.6425	-0.0006425	184.6	-0.6379	-0.0006379	184.6	-0.6331	-0.0006331	184.6	-0.6288	-0.0006288		184.6	-0.713	-0.000713	184.6	-0.6317	-0.0006317	184.6	-0.6379	-0.0006379	184.6	-0.6341
	185.1	-0.713	-0.000713	185.1	-0.6466	-0.0006466	185.1	-0.6378	-0.0006378	185.1	-0.613	-0.000613	185.1	-0.6063	-0.0006063	185.1	-0.5901	-0.0005901		185.1	-0.713	-0.000713	185.1	-0.6598	-0.0006598	185.1	-0.6425	-0.0006425	185.1	-0.6379	-0.0006379	185.1	-0.6331	-0.0006331	185.1	-0.6288	-0.0006288		185.1	-0.713	-0.000713	185.1	-0.6318	-0.0006318	185.1	-0.6379	-0.0006379	185.1	-0.6341
	185.6	-0.713	-0.000713	185.6	-0.6466	-0.0006466	185.6	-0.6378	-0.0006378	185.6	-0.6131	-0.0006131	185.6	-0.6064	-0.0006064	185.6	-0.5901	-0.0005901		185.6	-0.713	-0.000713	185.6	-0.6598	-0.0006598	185.6	-0.6425	-0.0006425	185.6	-0.6378	-0.0006378	185.6	-0.6331	-0.0006331	185.6	-0.6288	-0.0006288		185.6	-0.713	-0.000713	185.6	-0.6318	-0.0006318	185.6	-0.6379	-0.0006379	185.6	-0.6341
	186.1	-0.713	-0.000713	186.1	-0.6466	-0.0006466	186.1	-0.6379	-0.0006379	186.1	-0.6131	-0.0006131	186.1	-0.6064	-0.0006064	186.1	-0.5902	-0.0005902		186.1	-0.713	-0.000713	186.1	-0.6598	-0.0006598	186.1	-0.6426	-0.0006426	186.1	-0.6378	-0.0006378	186.1	-0.6331	-0.0006331	186.1	-0.6288	-0.0006288		186.1	-0.713	-0.000713	186.1	-0.6319	-0.0006319	186.1	-0.6379	-0.0006379	186.1	-0.634
	186.7	-0.7129	-0.0007129	186.7	-0.6467	-0.0006467	186.7	-0.6379	-0.0006379	186.7	-0.6131	-0.0006131	186.7	-0.6064	-0.0006064	186.7	-0.5902	-0.0005902		186.7	-0.7129	-0.0007129	186.7	-0.6598	-0.0006598	186.7	-0.6426	-0.0006426	186.7	-0.6378	-0.0006378	186.7	-0.6331	-0.0006331	186.7	-0.6288	-0.0006288		186.7	-0.7129	-0.0007129	186.7	-0.632	-0.000632	186.7	-0.6379	-0.0006379	186.7	-0.634
	187.2	-0.7129	-0.0007129	187.2	-0.6467	-0.0006467	187.2	-0.6379	-0.0006379	187.2	-0.6132	-0.0006132	187.2	-0.6065	-0.0006065	187.2	-0.5903	-0.0005903		187.2	-0.7129	-0.0007129	187.2	-0.6597	-0.0006597	187.2	-0.6426	-0.0006426	187.2	-0.6378	-0.0006378	187.2	-0.6331	-0.0006331	187.2	-0.6288	-0.0006288		187.2	-0.7129	-0.0007129	187.2	-0.632	-0.000632	187.2	-0.6379	-0.0006379	187.2	-0.634
	187.7	-0.7129	-0.0007129	187.7	-0.6467	-0.0006467	187.7	-0.6379	-0.0006379	187.7	-0.6132	-0.0006132	187.7	-0.6065	-0.0006065	187.7	-0.5903	-0.0005903		187.7	-0.7129	-0.0007129	187.7	-0.6597	-0.0006597	187.7	-0.6426	-0.0006426	187.7	-0.6378	-0.0006378	187.7	-0.6331	-0.0006331	187.7	-0.6288	-0.0006288		187.7	-0.7129	-0.0007129	187.7	-0.6321	-0.0006321	187.7	-0.6379	-0.0006379	187.7	-0.6339
	188.2	-0.7129	-0.0007129	188.2	-0.6467	-0.0006467	188.2	-0.6379	-0.0006379	188.2	-0.6132	-0.0006132	188.2	-0.6065	-0.0006065	188.2	-0.5903	-0.0005903		188.2	-0.7129	-0.0007129	188.2	-0.6597	-0.0006597	188.2	-0.6426	-0.0006426	188.2	-0.6378	-0.0006378	188.2	-0.6331	-0.0006331	188.2	-0.6288	-0.0006288		188.2	-0.7129	-0.0007129	188.2	-0.6321	-0.0006321	188.2	-0.6379	-0.0006379	188.2	-0.6339
	188.7	-0.7129	-0.0007129	188.7	-0.6467	-0.0006467	188.7	-0.6379	-0.0006379	188.7	-0.6132	-0.0006132	188.7	-0.6066	-0.0006066	188.7	-0.5904	-0.0005904		188.7	-0.7129	-0.0007129	188.7	-0.6597	-0.0006597	188.7	-0.6426	-0.0006426	188.7	-0.6378	-0.0006378	188.7	-0.6331	-0.0006331	188.7	-0.6288	-0.0006288		188.7	-0.7129	-0.0007129	188.7	-0.6322	-0.0006322	188.7	-0.6379	-0.0006379	188.7	-0.6338
	189.2	-0.7128	-0.0007128	189.2	-0.6467	-0.0006467	189.2	-0.638	-0.000638	189.2	-0.6132	-0.0006132	189.2	-0.6066	-0.0006066	189.2	-0.5904	-0.0005904		189.2	-0.7128	-0.0007128	189.2	-0.6597	-0.0006597	189.2	-0.6426	-0.0006426	189.2	-0.6378	-0.0006378	189.2	-0.6331	-0.0006331	189.2	-0.6288	-0.0006288		189.2	-0.7128	-0.0007128	189.2	-0.6323	-0.0006323	189.2	-0.6379	-0.0006379	189.2	-0.6338
	189.7	-0.7128	-0.0007128	189.7	-0.6468	-0.0006468	189.7	-0.638	-0.000638	189.7	-0.6132	-0.0006132	189.7	-0.6067	-0.0006067	189.7	-0.5904	-0.0005904		189.7	-0.7128	-0.0007128	189.7	-0.6597	-0.0006597	189.7	-0.6426	-0.0006426	189.7	-0.6378	-0.0006378	189.7	-0.6331	-0.0006331	189.7	-0.6288	-0.0006288		189.7	-0.7128	-0.0007128	189.7	-0.6323	-0.0006323	189.7	-0.6379	-0.0006379	189.7	-0.6338
	190.2	-0.7128	-0.0007128	190.2	-0.6468	-0.0006468	190.2	-0.638	-0.000638	190.2	-0.6133	-0.0006133	190.2	-0.6067	-0.0006067	190.2	-0.5905	-0.0005905		190.2	-0.7128	-0.0007128	190.2	-0.6597	-0.0006597	190.2	-0.6426	-0.0006426	190.2	-0.6378	-0.0006378	190.2	-0.6331	-0.0006331	190.2	-0.6288	-0.0006288		190.2	-0.7128	-0.0007128	190.2	-0.6324	-0.0006324	190.2	-0.6379	-0.0006379	190.2	-0.6337
	190.7	-0.7128	-0.0007128	190.7	-0.6468	-0.0006468	190.7	-0.638	-0.000638	190.7	-0.6133	-0.0006133	190.7	-0.6067	-0.0006067	190.7	-0.5905	-0.0005905		190.7	-0.7128	-0.0007128	190.7	-0.6596	-0.0006596	190.7	-0.6427	-0.0006427	190.7	-0.6378	-0.0006378	190.7	-0.6331	-0.0006331	190.7	-0.6288	-0.0006288		190.7	-0.7128	-0.0007128	190.7	-0.6324	-0.0006324	190.7	-0.6379	-0.0006379	190.7	-0.6337
	191.3	-0.7128	-0.0007128	191.3	-0.6468	-0.0006468	191.3	-0.638	-0.000638	191.3	-0.6133	-0.0006133	191.3	-0.6068	-0.0006068	191.3	-0.5906	-0.0005906		191.3	-0.7128	-0.0007128	191.3	-0.6596	-0.0006596	191.3	-0.6427	-0.0006427	191.3	-0.6377	-0.0006377	191.3	-0.6331	-0.0006331	191.3	-0.6288	-0.0006288		191.3	-0.7128	-0.0007128	191.3	-0.6325	-0.0006325	191.3	-0.6379	-0.0006379	191.3	-0.6337
	191.8	-0.7127	-0.0007127	191.8	-0.6469	-0.0006469	191.8	-0.638	-0.000638	191.8	-0.6133	-0.0006133	191.8	-0.6068	-0.0006068	191.8	-0.5906	-0.0005906		191.8	-0.7127	-0.0007127	191.8	-0.6596	-0.0006596	191.8	-0.6427	-0.0006427	191.8	-0.6377	-0.0006377	191.8	-0.6331	-0.0006331	191.8	-0.6288	-0.0006288		191.8	-0.7127	-0.0007127	191.8	-0.6325	-0.0006325	191.8	-0.6379	-0.0006379	191.8	-0.6336
	192.3	-0.7127	-0.0007127	192.3	-0.6469	-0.0006469	192.3	-0.638	-0.000638	192.3	-0.6133	-0.0006133	192.3	-0.6068	-0.0006068	192.3	-0.5906	-0.0005906		192.3	-0.7127	-0.0007127	192.3	-0.6596	-0.0006596	192.3	-0.6427	-0.0006427	192.3	-0.6377	-0.0006377	192.3	-0.6331	-0.0006331	192.3	-0.6288	-0.0006288		192.3	-0.7127	-0.0007127	192.3	-0.6326	-0.0006326	192.3	-0.6379	-0.0006379	192.3	-0.6336
	192.8	-0.7127	-0.0007127	192.8	-0.6469	-0.0006469	192.8	-0.638	-0.000638	192.8	-0.6133	-0.0006133	192.8	-0.6069	-0.0006069	192.8	-0.5907	-0.0005907		192.8	-0.7127	-0.0007127	192.8	-0.6596	-0.0006596	192.8	-0.6427	-0.0006427	192.8	-0.6377	-0.0006377	192.8	-0.6331	-0.0006331	192.8	-0.6288	-0.0006288		192.8	-0.7127	-0.0007127	192.8	-0.6326	-0.0006326	192.8	-0.6379	-0.0006379	192.8	-0.6336
	193.3	-0.7126	-0.0007126	193.3	-0.6469	-0.0006469	193.3	-0.6381	-0.0006381	193.3	-0.6133	-0.0006133	193.3	-0.6069	-0.0006069	193.3	-0.5907	-0.0005907		193.3	-0.7126	-0.0007126	193.3	-0.6596	-0.0006596	193.3	-0.6427	-0.0006427	193.3	-0.6377	-0.0006377	193.3	-0.6331	-0.0006331	193.3	-0.6288	-0.0006288		193.3	-0.7126	-0.0007126	193.3	-0.6327	-0.0006327	193.3	-0.6379	-0.0006379	193.3	-0.6335
	193.8	-0.7126	-0.0007126	193.8	-0.647	-0.000647	193.8	-0.6381	-0.0006381	193.8	-0.6133	-0.0006133	193.8	-0.607	-0.000607	193.8	-0.5908	-0.0005908		193.8	-0.7126	-0.0007126	193.8	-0.6596	-0.0006596	193.8	-0.6427	-0.0006427	193.8	-0.6377	-0.0006377	193.8	-0.6331	-0.0006331	193.8	-0.6288	-0.0006288		193.8	-0.7126	-0.0007126	193.8	-0.6328	-0.0006328	193.8	-0.6379	-0.0006379	193.8	-0.6335
	194.3	-0.7126	-0.0007126	194.3	-0.647	-0.000647	194.3	-0.6381	-0.0006381	194.3	-0.6133	-0.0006133	194.3	-0.607	-0.000607	194.3	-0.5908	-0.0005908		194.3	-0.7126	-0.0007126	194.3	-0.6596	-0.0006596	194.3	-0.6427	-0.0006427	194.3	-0.6377	-0.0006377	194.3	-0.6331	-0.0006331	194.3	-0.6288	-0.0006288		194.3	-0.7126	-0.0007126	194.3	-0.6329	-0.0006329	194.3	-0.6379	-0.0006379	194.3	-0.6334
	194.8	-0.7126	-0.0007126	194.8	-0.647	-0.000647	194.8	-0.6381	-0.0006381	194.8	-0.6133	-0.0006133	194.8	-0.607	-0.000607	194.8	-0.5908	-0.0005908		194.8	-0.7126	-0.0007126	194.8	-0.6596	-0.0006596	194.8	-0.6428	-0.0006428	194.8	-0.6377	-0.0006377	194.8	-0.6331	-0.0006331	194.8	-0.6288	-0.0006288		194.8	-0.7126	-0.0007126	194.8	-0.6329	-0.0006329	194.8	-0.6379	-0.0006379	194.8	-0.6334
	195.3	-0.7126	-0.0007126	195.3	-0.647	-0.000647	195.3	-0.6381	-0.0006381	195.3	-0.6133	-0.0006133	195.3	-0.6071	-0.0006071	195.3	-0.5909	-0.0005909		195.3	-0.7126	-0.0007126	195.3	-0.6595	-0.0006595	195.3	-0.6428	-0.0006428	195.3	-0.6377	-0.0006377	195.3	-0.6331	-0.0006331	195.3	-0.6288	-0.0006288		195.3	-0.7126	-0.0007126	195.3	-0.633	-0.000633	195.3	-0.6379	-0.0006379	195.3	-0.6334
	195.8	-0.7125	-0.0007125	195.8	-0.647	-0.000647	195.8	-0.6381	-0.0006381	195.8	-0.6133	-0.0006133	195.8	-0.6071	-0.0006071	195.8	-0.5909	-0.0005909		195.8	-0.7125	-0.0007125	195.8	-0.6595	-0.0006595	195.8	-0.6428	-0.0006428	195.8	-0.6377	-0.0006377	195.8	-0.6331	-0.0006331	195.8	-0.6288	-0.0006288		195.8	-0.7125	-0.0007125	195.8	-0.6331	-0.0006331	195.8	-0.6379	-0.0006379	195.8	-0.6333
	196.4	-0.7125	-0.0007125	196.4	-0.647	-0.000647	196.4	-0.6381	-0.0006381	196.4	-0.6134	-0.0006134	196.4	-0.6071	-0.0006071	196.4	-0.591	-0.000591		196.4	-0.7125	-0.0007125	196.4	-0.6595	-0.0006595	196.4	-0.6428	-0.0006428	196.4	-0.6377	-0.0006377	196.4	-0.6331	-0.0006331	196.4	-0.6288	-0.0006288		196.4	-0.7125	-0.0007125	196.4	-0.6332	-0.0006332	196.4	-0.6379	-0.0006379	196.4	-0.6333
	196.9	-0.7125	-0.0007125	196.9	-0.647	-0.000647	196.9	-0.6381	-0.0006381	196.9	-0.6134	-0.0006134	196.9	-0.6072	-0.0006072	196.9	-0.591	-0.000591		196.9	-0.7125	-0.0007125	196.9	-0.6595	-0.0006595	196.9	-0.6428	-0.0006428	196.9	-0.6377	-0.0006377	196.9	-0.6331	-0.0006331	196.9	-0.6288	-0.0006288		196.9	-0.7125	-0.0007125	196.9	-0.6332	-0.0006332	196.9	-0.6379	-0.0006379	196.9	-0.6333
	197.4	-0.7125	-0.0007125	197.4	-0.647	-0.000647	197.4	-0.6382	-0.0006382	197.4	-0.6134	-0.0006134	197.4	-0.6072	-0.0006072	197.4	-0.591	-0.000591		197.4	-0.7125	-0.0007125	197.4	-0.6595	-0.0006595	197.4	-0.6428	-0.0006428	197.4	-0.6377	-0.0006377	197.4	-0.6331	-0.0006331	197.4	-0.6288	-0.0006288		197.4	-0.7125	-0.0007125	197.4	-0.6333	-0.0006333	197.4	-0.6379	-0.0006379	197.4	-0.6332
	197.9	-0.7125	-0.0007125	197.9	-0.6471	-0.0006471	197.9	-0.6382	-0.0006382	197.9	-0.6134	-0.0006134	197.9	-0.6072	-0.0006072	197.9	-0.5911	-0.0005911		197.9	-0.7125	-0.0007125	197.9	-0.6595	-0.0006595	197.9	-0.6428	-0.0006428	197.9	-0.6377	-0.0006377	197.9	-0.6331	-0.0006331	197.9	-0.6288	-0.0006288		197.9	-0.7125	-0.0007125	197.9	-0.6334	-0.0006334	197.9	-0.6379	-0.0006379	197.9	-0.6332
	198.4	-0.7125	-0.0007125	198.4	-0.6471	-0.0006471	198.4	-0.6382	-0.0006382	198.4	-0.6135	-0.0006135	198.4	-0.6073	-0.0006073	198.4	-0.5911	-0.0005911		198.4	-0.7125	-0.0007125	198.4	-0.6595	-0.0006595	198.4	-0.6428	-0.0006428	198.4	-0.6377	-0.0006377	198.4	-0.6331	-0.0006331	198.4	-0.6288	-0.0006288		198.4	-0.7125	-0.0007125	198.4	-0.6334	-0.0006334	198.4	-0.6379	-0.0006379	198.4	-0.6332
	198.9	-0.7124	-0.0007124	198.9	-0.6471	-0.0006471	198.9	-0.6382	-0.0006382	198.9	-0.6135	-0.0006135	198.9	-0.6073	-0.0006073	198.9	-0.5912	-0.0005912		198.9	-0.7124	-0.0007124	198.9	-0.6594	-0.0006594	198.9	-0.6428	-0.0006428	198.9	-0.6377	-0.0006377	198.9	-0.6331	-0.0006331	198.9	-0.6287	-0.0006287		198.9	-0.7124	-0.0007124	198.9	-0.6335	-0.0006335	198.9	-0.6379	-0.0006379	198.9	-0.6331
	199.4	-0.7124	-0.0007124	199.4	-0.6471	-0.0006471	199.4	-0.6382	-0.0006382	199.4	-0.6134	-0.0006134	199.4	-0.6073	-0.0006073	199.4	-0.5912	-0.0005912		199.4	-0.7124	-0.0007124	199.4	-0.6594	-0.0006594	199.4	-0.6428	-0.0006428	199.4	-0.6377	-0.0006377	199.4	-0.6331	-0.0006331	199.4	-0.6287	-0.0006287		199.4	-0.7124	-0.0007124	199.4	-0.6335	-0.0006335	199.4	-0.6379	-0.0006379	199.4	-0.6331
	199.9	-0.7124	-0.0007124	199.9	-0.6471	-0.0006471	199.9	-0.6382	-0.0006382	199.9	-0.6134	-0.0006134	199.9	-0.6074	-0.0006074	199.9	-0.5913	-0.0005913		199.9	-0.7124	-0.0007124	199.9	-0.6594	-0.0006594	199.9	-0.6429	-0.0006429	199.9	-0.6377	-0.0006377	199.9	-0.6331	-0.0006331	199.9	-0.6287	-0.0006287		199.9	-0.7124	-0.0007124	199.9	-0.6336	-0.0006336	199.9	-0.6379	-0.0006379	199.9	-0.633
	200.4	-0.7124	-0.0007124	200.4	-0.6471	-0.0006471	200.4	-0.6382	-0.0006382	200.4	-0.6134	-0.0006134	200.4	-0.6074	-0.0006074	200.4	-0.5913	-0.0005913		200.4	-0.7124	-0.0007124	200.4	-0.6594	-0.0006594	200.4	-0.6429	-0.0006429	200.4	-0.6376	-0.0006376	200.4	-0.6331	-0.0006331	200.4	-0.6287	-0.0006287		200.4	-0.7124	-0.0007124	200.4	-0.6336	-0.0006336	200.4	-0.6379	-0.0006379	200.4	-0.633
	200.9	-0.7123	-0.0007123	200.9	-0.6471	-0.0006471	200.9	-0.6382	-0.0006382	200.9	-0.6134	-0.0006134	200.9	-0.6074	-0.0006074	200.9	-0.5913	-0.0005913		200.9	-0.7123	-0.0007123	200.9	-0.6594	-0.0006594	200.9	-0.6429	-0.0006429	200.9	-0.6376	-0.0006376	200.9	-0.6331	-0.0006331	200.9	-0.6288	-0.0006288		200.9	-0.7123	-0.0007123	200.9	-0.6337	-0.0006337	200.9	-0.6379	-0.0006379	200.9	-0.633
	201.4	-0.7123	-0.0007123	201.4	-0.6472	-0.0006472	201.4	-0.6382	-0.0006382	201.4	-0.6134	-0.0006134	201.4	-0.6075	-0.0006075	201.4	-0.5914	-0.0005914		201.4	-0.7123	-0.0007123	201.4	-0.6594	-0.0006594	201.4	-0.6429	-0.0006429	201.4	-0.6376	-0.0006376	201.4	-0.6331	-0.0006331	201.4	-0.6288	-0.0006288		201.4	-0.7123	-0.0007123	201.4	-0.6338	-0.0006338	201.4	-0.6379	-0.0006379	201.4	-0.6329
	202	-0.7123	-0.0007123	202	-0.6472	-0.0006472	202	-0.6383	-0.0006383	202	-0.6134	-0.0006134	202	-0.6075	-0.0006075	202	-0.5914	-0.0005914		202	-0.7123	-0.0007123	202	-0.6594	-0.0006594	202	-0.6429	-0.0006429	202	-0.6376	-0.0006376	202	-0.6331	-0.0006331	202	-0.6288	-0.0006288		202	-0.7123	-0.0007123	202	-0.6339	-0.0006339	202	-0.6379	-0.0006379	202	-0.6329
	202.5	-0.7123	-0.0007123	202.5	-0.6472	-0.0006472	202.5	-0.6383	-0.0006383	202.5	-0.6134	-0.0006134	202.5	-0.6075	-0.0006075	202.5	-0.5915	-0.0005915		202.5	-0.7123	-0.0007123	202.5	-0.6594	-0.0006594	202.5	-0.6429	-0.0006429	202.5	-0.6376	-0.0006376	202.5	-0.6331	-0.0006331	202.5	-0.6288	-0.0006288		202.5	-0.7123	-0.0007123	202.5	-0.6339	-0.0006339	202.5	-0.6379	-0.0006379	202.5	-0.6329
	203	-0.7122	-0.0007122	203	-0.6473	-0.0006473	203	-0.6383	-0.0006383	203	-0.6134	-0.0006134	203	-0.6076	-0.0006076	203	-0.5915	-0.0005915		203	-0.7122	-0.0007122	203	-0.6593	-0.0006593	203	-0.6429	-0.0006429	203	-0.6376	-0.0006376	203	-0.6331	-0.0006331	203	-0.6288	-0.0006288		203	-0.7122	-0.0007122	203	-0.634	-0.000634	203	-0.6379	-0.0006379	203	-0.6328
	203.5	-0.7122	-0.0007122	203.5	-0.6473	-0.0006473	203.5	-0.6383	-0.0006383	203.5	-0.6135	-0.0006135	203.5	-0.6076	-0.0006076	203.5	-0.5916	-0.0005916		203.5	-0.7122	-0.0007122	203.5	-0.6593	-0.0006593	203.5	-0.643	-0.000643	203.5	-0.6376	-0.0006376	203.5	-0.6331	-0.0006331	203.5	-0.6288	-0.0006288		203.5	-0.7122	-0.0007122	203.5	-0.634	-0.000634	203.5	-0.6379	-0.0006379	203.5	-0.6328
	204	-0.7122	-0.0007122	204	-0.6473	-0.0006473	204	-0.6383	-0.0006383	204	-0.6135	-0.0006135	204	-0.6076	-0.0006076	204	-0.5916	-0.0005916		204	-0.7122	-0.0007122	204	-0.6593	-0.0006593	204	-0.643	-0.000643	204	-0.6376	-0.0006376	204	-0.6331	-0.0006331	204	-0.6288	-0.0006288		204	-0.7122	-0.0007122	204	-0.6341	-0.0006341	204	-0.6379	-0.0006379	204	-0.6328
	204.5	-0.7122	-0.0007122	204.5	-0.6474	-0.0006474	204.5	-0.6383	-0.0006383	204.5	-0.6135	-0.0006135	204.5	-0.6077	-0.0006077	204.5	-0.5917	-0.0005917		204.5	-0.7122	-0.0007122	204.5	-0.6593	-0.0006593	204.5	-0.643	-0.000643	204.5	-0.6376	-0.0006376	204.5	-0.6331	-0.0006331	204.5	-0.6288	-0.0006288		204.5	-0.7122	-0.0007122	204.5	-0.6342	-0.0006342	204.5	-0.6379	-0.0006379	204.5	-0.6327
	205	-0.7121	-0.0007121	205	-0.6474	-0.0006474	205	-0.6383	-0.0006383	205	-0.6135	-0.0006135	205	-0.6077	-0.0006077	205	-0.5917	-0.0005917		205	-0.7121	-0.0007121	205	-0.6593	-0.0006593	205	-0.643	-0.000643	205	-0.6376	-0.0006376	205	-0.6331	-0.0006331	205	-0.6288	-0.0006288		205	-0.7121	-0.0007121	205	-0.6342	-0.0006342	205	-0.6379	-0.0006379	205	-0.6327
	205.5	-0.7121	-0.0007121	205.5	-0.6474	-0.0006474	205.5	-0.6383	-0.0006383	205.5	-0.6136	-0.0006136	205.5	-0.6077	-0.0006077	205.5	-0.5918	-0.0005918		205.5	-0.7121	-0.0007121	205.5	-0.6593	-0.0006593	205.5	-0.643	-0.000643	205.5	-0.6376	-0.0006376	205.5	-0.6331	-0.0006331	205.5	-0.6288	-0.0006288		205.5	-0.7121	-0.0007121	205.5	-0.6343	-0.0006343	205.5	-0.6379	-0.0006379	205.5	-0.6327
	206	-0.7121	-0.0007121	206	-0.6474	-0.0006474	206	-0.6384	-0.0006384	206	-0.6136	-0.0006136	206	-0.6078	-0.0006078	206	-0.5918	-0.0005918		206	-0.7121	-0.0007121	206	-0.6593	-0.0006593	206	-0.643	-0.000643	206	-0.6376	-0.0006376	206	-0.6331	-0.0006331	206	-0.6288	-0.0006288		206	-0.7121	-0.0007121	206	-0.6343	-0.0006343	206	-0.6379	-0.0006379	206	-0.6326
	206.6	-0.7121	-0.0007121	206.6	-0.6474	-0.0006474	206.6	-0.6384	-0.0006384	206.6	-0.6136	-0.0006136	206.6	-0.6078	-0.0006078	206.6	-0.5919	-0.0005919		206.6	-0.7121	-0.0007121	206.6	-0.6592	-0.0006592	206.6	-0.643	-0.000643	206.6	-0.6376	-0.0006376	206.6	-0.6331	-0.0006331	206.6	-0.6288	-0.0006288		206.6	-0.7121	-0.0007121	206.6	-0.6344	-0.0006344	206.6	-0.6379	-0.0006379	206.6	-0.6326
	207.1	-0.712	-0.000712	207.1	-0.6474	-0.0006474	207.1	-0.6384	-0.0006384	207.1	-0.6136	-0.0006136	207.1	-0.6079	-0.0006079	207.1	-0.5919	-0.0005919		207.1	-0.712	-0.000712	207.1	-0.6592	-0.0006592	207.1	-0.643	-0.000643	207.1	-0.6376	-0.0006376	207.1	-0.6331	-0.0006331	207.1	-0.6288	-0.0006288		207.1	-0.712	-0.000712	207.1	-0.6345	-0.0006345	207.1	-0.6379	-0.0006379	207.1	-0.6326
	207.6	-0.712	-0.000712	207.6	-0.6474	-0.0006474	207.6	-0.6384	-0.0006384	207.6	-0.6136	-0.0006136	207.6	-0.6079	-0.0006079	207.6	-0.592	-0.000592		207.6	-0.712	-0.000712	207.6	-0.6592	-0.0006592	207.6	-0.643	-0.000643	207.6	-0.6376	-0.0006376	207.6	-0.6331	-0.0006331	207.6	-0.6288	-0.0006288		207.6	-0.712	-0.000712	207.6	-0.6346	-0.0006346	207.6	-0.6379	-0.0006379	207.6	-0.6326
	208.1	-0.7119	-0.0007119	208.1	-0.6474	-0.0006474	208.1	-0.6384	-0.0006384	208.1	-0.6136	-0.0006136	208.1	-0.6079	-0.0006079	208.1	-0.592	-0.000592		208.1	-0.7119	-0.0007119	208.1	-0.6592	-0.0006592	208.1	-0.643	-0.000643	208.1	-0.6376	-0.0006376	208.1	-0.6331	-0.0006331	208.1	-0.6288	-0.0006288		208.1	-0.7119	-0.0007119	208.1	-0.6347	-0.0006347	208.1	-0.6379	-0.0006379	208.1	-0.6325
	208.6	-0.7119	-0.0007119	208.6	-0.6475	-0.0006475	208.6	-0.6384	-0.0006384	208.6	-0.6136	-0.0006136	208.6	-0.608	-0.000608	208.6	-0.5921	-0.0005921		208.6	-0.7119	-0.0007119	208.6	-0.6592	-0.0006592	208.6	-0.6431	-0.0006431	208.6	-0.6376	-0.0006376	208.6	-0.6331	-0.0006331	208.6	-0.6288	-0.0006288		208.6	-0.7119	-0.0007119	208.6	-0.6347	-0.0006347	208.6	-0.6379	-0.0006379	208.6	-0.6325
	209.1	-0.7119	-0.0007119	209.1	-0.6475	-0.0006475	209.1	-0.6384	-0.0006384	209.1	-0.6136	-0.0006136	209.1	-0.608	-0.000608	209.1	-0.5921	-0.0005921		209.1	-0.7119	-0.0007119	209.1	-0.6592	-0.0006592	209.1	-0.6431	-0.0006431	209.1	-0.6375	-0.0006375	209.1	-0.6331	-0.0006331	209.1	-0.6288	-0.0006288		209.1	-0.7119	-0.0007119	209.1	-0.6348	-0.0006348	209.1	-0.6379	-0.0006379	209.1	-0.6324
	209.6	-0.7118	-0.0007118	209.6	-0.6475	-0.0006475	209.6	-0.6384	-0.0006384	209.6	-0.6136	-0.0006136	209.6	-0.608	-0.000608	209.6	-0.5921	-0.0005921		209.6	-0.7118	-0.0007118	209.6	-0.6592	-0.0006592	209.6	-0.6431	-0.0006431	209.6	-0.6375	-0.0006375	209.6	-0.6331	-0.0006331	209.6	-0.6288	-0.0006288		209.6	-0.7118	-0.0007118	209.6	-0.6348	-0.0006348	209.6	-0.6379	-0.0006379	209.6	-0.6324
	210.1	-0.7118	-0.0007118	210.1	-0.6475	-0.0006475	210.1	-0.6384	-0.0006384	210.1	-0.6136	-0.0006136	210.1	-0.6081	-0.0006081	210.1	-0.5922	-0.0005922		210.1	-0.7118	-0.0007118	210.1	-0.6592	-0.0006592	210.1	-0.6431	-0.0006431	210.1	-0.6375	-0.0006375	210.1	-0.6331	-0.0006331	210.1	-0.6288	-0.0006288		210.1	-0.7118	-0.0007118	210.1	-0.6349	-0.0006349	210.1	-0.6379	-0.0006379	210.1	-0.6324
	210.6	-0.7118	-0.0007118	210.6	-0.6475	-0.0006475	210.6	-0.6385	-0.0006385	210.6	-0.6136	-0.0006136	210.6	-0.6081	-0.0006081	210.6	-0.5922	-0.0005922		210.6	-0.7118	-0.0007118	210.6	-0.6591	-0.0006591	210.6	-0.6431	-0.0006431	210.6	-0.6375	-0.0006375	210.6	-0.6331	-0.0006331	210.6	-0.6287	-0.0006287		210.6	-0.7118	-0.0007118	210.6	-0.6349	-0.0006349	210.6	-0.6379	-0.0006379	210.6	-0.6324
	211.1	-0.7117	-0.0007117	211.1	-0.6476	-0.0006476	211.1	-0.6385	-0.0006385	211.1	-0.6136	-0.0006136	211.1	-0.6081	-0.0006081	211.1	-0.5923	-0.0005923		211.1	-0.7117	-0.0007117	211.1	-0.6591	-0.0006591	211.1	-0.6431	-0.0006431	211.1	-0.6375	-0.0006375	211.1	-0.6331	-0.0006331	211.1	-0.6287	-0.0006287		211.1	-0.7117	-0.0007117	211.1	-0.635	-0.000635	211.1	-0.6379	-0.0006379	211.1	-0.6323
	211.6	-0.7117	-0.0007117	211.6	-0.6476	-0.0006476	211.6	-0.6385	-0.0006385	211.6	-0.6137	-0.0006137	211.6	-0.6082	-0.0006082	211.6	-0.5923	-0.0005923		211.6	-0.7117	-0.0007117	211.6	-0.6591	-0.0006591	211.6	-0.6431	-0.0006431	211.6	-0.6375	-0.0006375	211.6	-0.6331	-0.0006331	211.6	-0.6287	-0.0006287		211.6	-0.7117	-0.0007117	211.6	-0.635	-0.000635	211.6	-0.6379	-0.0006379	211.6	-0.6323
	212.2	-0.7117	-0.0007117	212.2	-0.6476	-0.0006476	212.2	-0.6385	-0.0006385	212.2	-0.6137	-0.0006137	212.2	-0.6082	-0.0006082	212.2	-0.5923	-0.0005923		212.2	-0.7117	-0.0007117	212.2	-0.6591	-0.0006591	212.2	-0.6431	-0.0006431	212.2	-0.6375	-0.0006375	212.2	-0.6331	-0.0006331	212.2	-0.6287	-0.0006287		212.2	-0.7117	-0.0007117	212.2	-0.6351	-0.0006351	212.2	-0.6379	-0.0006379	212.2	-0.6323
	212.7	-0.7116	-0.0007116	212.7	-0.6477	-0.0006477	212.7	-0.6385	-0.0006385	212.7	-0.6137	-0.0006137	212.7	-0.6082	-0.0006082	212.7	-0.5924	-0.0005924		212.7	-0.7116	-0.0007116	212.7	-0.6591	-0.0006591	212.7	-0.6432	-0.0006432	212.7	-0.6375	-0.0006375	212.7	-0.6331	-0.0006331	212.7	-0.6287	-0.0006287		212.7	-0.7116	-0.0007116	212.7	-0.6352	-0.0006352	212.7	-0.6379	-0.0006379	212.7	-0.6322
	213.2	-0.7116	-0.0007116	213.2	-0.6477	-0.0006477	213.2	-0.6385	-0.0006385	213.2	-0.6137	-0.0006137	213.2	-0.6083	-0.0006083	213.2	-0.5924	-0.0005924		213.2	-0.7116	-0.0007116	213.2	-0.6591	-0.0006591	213.2	-0.6432	-0.0006432	213.2	-0.6375	-0.0006375	213.2	-0.6331	-0.0006331	213.2	-0.6287	-0.0006287		213.2	-0.7116	-0.0007116	213.2	-0.6352	-0.0006352	213.2	-0.6379	-0.0006379	213.2	-0.6322
	213.7	-0.7115	-0.0007115	213.7	-0.6477	-0.0006477	213.7	-0.6385	-0.0006385	213.7	-0.6137	-0.0006137	213.7	-0.6083	-0.0006083	213.7	-0.5925	-0.0005925		213.7	-0.7115	-0.0007115	213.7	-0.659	-0.000659	213.7	-0.6432	-0.0006432	213.7	-0.6375	-0.0006375	213.7	-0.6331	-0.0006331	213.7	-0.6287	-0.0006287		213.7	-0.7115	-0.0007115	213.7	-0.6353	-0.0006353	213.7	-0.6379	-0.0006379	213.7	-0.6322
	214.2	-0.7115	-0.0007115	214.2	-0.6477	-0.0006477	214.2	-0.6385	-0.0006385	214.2	-0.6138	-0.0006138	214.2	-0.6083	-0.0006083	214.2	-0.5925	-0.0005925		214.2	-0.7115	-0.0007115	214.2	-0.659	-0.000659	214.2	-0.6432	-0.0006432	214.2	-0.6375	-0.0006375	214.2	-0.6331	-0.0006331	214.2	-0.6287	-0.0006287		214.2	-0.7115	-0.0007115	214.2	-0.6354	-0.0006354	214.2	-0.6379	-0.0006379	214.2	-0.6321
	214.7	-0.7115	-0.0007115	214.7	-0.6477	-0.0006477	214.7	-0.6385	-0.0006385	214.7	-0.6138	-0.0006138	214.7	-0.6084	-0.0006084	214.7	-0.5925	-0.0005925		214.7	-0.7115	-0.0007115	214.7	-0.659	-0.000659	214.7	-0.6432	-0.0006432	214.7	-0.6375	-0.0006375	214.7	-0.6331	-0.0006331	214.7	-0.6287	-0.0006287		214.7	-0.7115	-0.0007115	214.7	-0.6355	-0.0006355	214.7	-0.6379	-0.0006379	214.7	-0.6321
	215.2	-0.7115	-0.0007115	215.2	-0.6477	-0.0006477	215.2	-0.6385	-0.0006385	215.2	-0.6138	-0.0006138	215.2	-0.6084	-0.0006084	215.2	-0.5926	-0.0005926		215.2	-0.7115	-0.0007115	215.2	-0.659	-0.000659	215.2	-0.6432	-0.0006432	215.2	-0.6375	-0.0006375	215.2	-0.6331	-0.0006331	215.2	-0.6287	-0.0006287		215.2	-0.7115	-0.0007115	215.2	-0.6355	-0.0006355	215.2	-0.6379	-0.0006379	215.2	-0.6321
	215.7	-0.7115	-0.0007115	215.7	-0.6477	-0.0006477	215.7	-0.6386	-0.0006386	215.7	-0.6138	-0.0006138	215.7	-0.6084	-0.0006084	215.7	-0.5926	-0.0005926		215.7	-0.7115	-0.0007115	215.7	-0.659	-0.000659	215.7	-0.6432	-0.0006432	215.7	-0.6375	-0.0006375	215.7	-0.6331	-0.0006331	215.7	-0.6287	-0.0006287		215.7	-0.7115	-0.0007115	215.7	-0.6356	-0.0006356	215.7	-0.6379	-0.0006379	215.7	-0.632
	216.2	-0.7114	-0.0007114	216.2	-0.6477	-0.0006477	216.2	-0.6386	-0.0006386	216.2	-0.6138	-0.0006138	216.2	-0.6085	-0.0006085	216.2	-0.5927	-0.0005927		216.2	-0.7114	-0.0007114	216.2	-0.659	-0.000659	216.2	-0.6432	-0.0006432	216.2	-0.6374	-0.0006374	216.2	-0.6331	-0.0006331	216.2	-0.6287	-0.0006287		216.2	-0.7114	-0.0007114	216.2	-0.6356	-0.0006356	216.2	-0.6379	-0.0006379	216.2	-0.632
	216.8	-0.7114	-0.0007114	216.8	-0.6477	-0.0006477	216.8	-0.6386	-0.0006386	216.8	-0.6139	-0.0006139	216.8	-0.6085	-0.0006085	216.8	-0.5927	-0.0005927		216.8	-0.7114	-0.0007114	216.8	-0.659	-0.000659	216.8	-0.6432	-0.0006432	216.8	-0.6374	-0.0006374	216.8	-0.6331	-0.0006331	216.8	-0.6287	-0.0006287		216.8	-0.7114	-0.0007114	216.8	-0.6357	-0.0006357	216.8	-0.6379	-0.0006379	216.8	-0.632
	217.3	-0.7114	-0.0007114	217.3	-0.6477	-0.0006477	217.3	-0.6386	-0.0006386	217.3	-0.6139	-0.0006139	217.3	-0.6085	-0.0006085	217.3	-0.5928	-0.0005928		217.3	-0.7114	-0.0007114	217.3	-0.659	-0.000659	217.3	-0.6433	-0.0006433	217.3	-0.6374	-0.0006374	217.3	-0.6331	-0.0006331	217.3	-0.6287	-0.0006287		217.3	-0.7114	-0.0007114	217.3	-0.6357	-0.0006357	217.3	-0.6379	-0.0006379	217.3	-0.632
	217.8	-0.7114	-0.0007114	217.8	-0.6477	-0.0006477	217.8	-0.6386	-0.0006386	217.8	-0.6139	-0.0006139	217.8	-0.6086	-0.0006086	217.8	-0.5928	-0.0005928		217.8	-0.7114	-0.0007114	217.8	-0.6589	-0.0006589	217.8	-0.6433	-0.0006433	217.8	-0.6374	-0.0006374	217.8	-0.6331	-0.0006331	217.8	-0.6287	-0.0006287		217.8	-0.7114	-0.0007114	217.8	-0.6358	-0.0006358	217.8	-0.6379	-0.0006379	217.8	-0.6319
	218.3	-0.7114	-0.0007114	218.3	-0.6478	-0.0006478	218.3	-0.6386	-0.0006386	218.3	-0.6139	-0.0006139	218.3	-0.6086	-0.0006086	218.3	-0.5928	-0.0005928		218.3	-0.7114	-0.0007114	218.3	-0.6589	-0.0006589	218.3	-0.6433	-0.0006433	218.3	-0.6374	-0.0006374	218.3	-0.6331	-0.0006331	218.3	-0.6287	-0.0006287		218.3	-0.7114	-0.0007114	218.3	-0.6359	-0.0006359	218.3	-0.6379	-0.0006379	218.3	-0.6319
	218.8	-0.7113	-0.0007113	218.8	-0.6478	-0.0006478	218.8	-0.6386	-0.0006386	218.8	-0.6139	-0.0006139	218.8	-0.6086	-0.0006086	218.8	-0.5929	-0.0005929		218.8	-0.7113	-0.0007113	218.8	-0.6589	-0.0006589	218.8	-0.6433	-0.0006433	218.8	-0.6374	-0.0006374	218.8	-0.6331	-0.0006331	218.8	-0.6287	-0.0006287		218.8	-0.7113	-0.0007113	218.8	-0.6359	-0.0006359	218.8	-0.6379	-0.0006379	218.8	-0.6319
	219.3	-0.7113	-0.0007113	219.3	-0.6478	-0.0006478	219.3	-0.6386	-0.0006386	219.3	-0.6139	-0.0006139	219.3	-0.6086	-0.0006086	219.3	-0.5929	-0.0005929		219.3	-0.7113	-0.0007113	219.3	-0.6589	-0.0006589	219.3	-0.6433	-0.0006433	219.3	-0.6374	-0.0006374	219.3	-0.6331	-0.0006331	219.3	-0.6287	-0.0006287		219.3	-0.7113	-0.0007113	219.3	-0.636	-0.000636	219.3	-0.6379	-0.0006379	219.3	-0.6319
	219.8	-0.7113	-0.0007113	219.8	-0.6478	-0.0006478	219.8	-0.6386	-0.0006386	219.8	-0.6138	-0.0006138	219.8	-0.6087	-0.0006087	219.8	-0.593	-0.000593		219.8	-0.7113	-0.0007113	219.8	-0.6589	-0.0006589	219.8	-0.6433	-0.0006433	219.8	-0.6374	-0.0006374	219.8	-0.6331	-0.0006331	219.8	-0.6287	-0.0006287		219.8	-0.7113	-0.0007113	219.8	-0.636	-0.000636	219.8	-0.6379	-0.0006379	219.8	-0.6318
	220.3	-0.7113	-0.0007113	220.3	-0.6478	-0.0006478	220.3	-0.6386	-0.0006386	220.3	-0.6138	-0.0006138	220.3	-0.6087	-0.0006087	220.3	-0.593	-0.000593		220.3	-0.7113	-0.0007113	220.3	-0.6589	-0.0006589	220.3	-0.6433	-0.0006433	220.3	-0.6374	-0.0006374	220.3	-0.6331	-0.0006331	220.3	-0.6287	-0.0006287		220.3	-0.7113	-0.0007113	220.3	-0.6361	-0.0006361	220.3	-0.6379	-0.0006379	220.3	-0.6318
	220.8	-0.7112	-0.0007112	220.8	-0.6478	-0.0006478	220.8	-0.6386	-0.0006386	220.8	-0.6139	-0.0006139	220.8	-0.6087	-0.0006087	220.8	-0.593	-0.000593		220.8	-0.7112	-0.0007112	220.8	-0.6588	-0.0006588	220.8	-0.6433	-0.0006433	220.8	-0.6374	-0.0006374	220.8	-0.6331	-0.0006331	220.8	-0.6287	-0.0006287		220.8	-0.7112	-0.0007112	220.8	-0.6361	-0.0006361	220.8	-0.6379	-0.0006379	220.8	-0.6318
	221.3	-0.7112	-0.0007112	221.3	-0.6478	-0.0006478	221.3	-0.6386	-0.0006386	221.3	-0.6139	-0.0006139	221.3	-0.6088	-0.0006088	221.3	-0.5931	-0.0005931		221.3	-0.7112	-0.0007112	221.3	-0.6588	-0.0006588	221.3	-0.6433	-0.0006433	221.3	-0.6374	-0.0006374	221.3	-0.6331	-0.0006331	221.3	-0.6287	-0.0006287		221.3	-0.7112	-0.0007112	221.3	-0.6362	-0.0006362	221.3	-0.6379	-0.0006379	221.3	-0.6317
	221.9	-0.7112	-0.0007112	221.9	-0.6478	-0.0006478	221.9	-0.6387	-0.0006387	221.9	-0.614	-0.000614	221.9	-0.6088	-0.0006088	221.9	-0.5931	-0.0005931		221.9	-0.7112	-0.0007112	221.9	-0.6588	-0.0006588	221.9	-0.6433	-0.0006433	221.9	-0.6374	-0.0006374	221.9	-0.6331	-0.0006331	221.9	-0.6287	-0.0006287		221.9	-0.7112	-0.0007112	221.9	-0.6363	-0.0006363	221.9	-0.6379	-0.0006379	221.9	-0.6317
	222.4	-0.7111	-0.0007111	222.4	-0.6479	-0.0006479	222.4	-0.6387	-0.0006387	222.4	-0.614	-0.000614	222.4	-0.6088	-0.0006088	222.4	-0.5932	-0.0005932		222.4	-0.7111	-0.0007111	222.4	-0.6588	-0.0006588	222.4	-0.6433	-0.0006433	222.4	-0.6374	-0.0006374	222.4	-0.6331	-0.0006331	222.4	-0.6287	-0.0006287		222.4	-0.7111	-0.0007111	222.4	-0.6363	-0.0006363	222.4	-0.6379	-0.0006379	222.4	-0.6317
	222.9	-0.7111	-0.0007111	222.9	-0.6479	-0.0006479	222.9	-0.6387	-0.0006387	222.9	-0.614	-0.000614	222.9	-0.6089	-0.0006089	222.9	-0.5932	-0.0005932		222.9	-0.7111	-0.0007111	222.9	-0.6588	-0.0006588	222.9	-0.6433	-0.0006433	222.9	-0.6374	-0.0006374	222.9	-0.6331	-0.0006331	222.9	-0.6287	-0.0006287		222.9	-0.7111	-0.0007111	222.9	-0.6364	-0.0006364	222.9	-0.6379	-0.0006379	222.9	-0.6316
	223.4	-0.7111	-0.0007111	223.4	-0.6479	-0.0006479	223.4	-0.6387	-0.0006387	223.4	-0.614	-0.000614	223.4	-0.6089	-0.0006089	223.4	-0.5932	-0.0005932		223.4	-0.7111	-0.0007111	223.4	-0.6587	-0.0006587	223.4	-0.6433	-0.0006433	223.4	-0.6374	-0.0006374	223.4	-0.6331	-0.0006331	223.4	-0.6287	-0.0006287		223.4	-0.7111	-0.0007111	223.4	-0.6365	-0.0006365	223.4	-0.6379	-0.0006379	223.4	-0.6316
	223.9	-0.7111	-0.0007111	223.9	-0.6479	-0.0006479	223.9	-0.6387	-0.0006387	223.9	-0.614	-0.000614	223.9	-0.6089	-0.0006089	223.9	-0.5933	-0.0005933		223.9	-0.7111	-0.0007111	223.9	-0.6587	-0.0006587	223.9	-0.6434	-0.0006434	223.9	-0.6374	-0.0006374	223.9	-0.6331	-0.0006331	223.9	-0.6287	-0.0006287		223.9	-0.7111	-0.0007111	223.9	-0.6365	-0.0006365	223.9	-0.6379	-0.0006379	223.9	-0.6316
	224.4	-0.7111	-0.0007111	224.4	-0.6479	-0.0006479	224.4	-0.6387	-0.0006387	224.4	-0.614	-0.000614	224.4	-0.609	-0.000609	224.4	-0.5933	-0.0005933		224.4	-0.7111	-0.0007111	224.4	-0.6587	-0.0006587	224.4	-0.6434	-0.0006434	224.4	-0.6374	-0.0006374	224.4	-0.6331	-0.0006331	224.4	-0.6287	-0.0006287		224.4	-0.7111	-0.0007111	224.4	-0.6365	-0.0006365	224.4	-0.6379	-0.0006379	224.4	-0.6316
	224.9	-0.7111	-0.0007111	224.9	-0.6479	-0.0006479	224.9	-0.6387	-0.0006387	224.9	-0.614	-0.000614	224.9	-0.609	-0.000609	224.9	-0.5933	-0.0005933		224.9	-0.7111	-0.0007111	224.9	-0.6587	-0.0006587	224.9	-0.6434	-0.0006434	224.9	-0.6373	-0.0006373	224.9	-0.6331	-0.0006331	224.9	-0.6287	-0.0006287		224.9	-0.7111	-0.0007111	224.9	-0.6366	-0.0006366	224.9	-0.6379	-0.0006379	224.9	-0.6315
	225.4	-0.7111	-0.0007111	225.4	-0.6479	-0.0006479	225.4	-0.6387	-0.0006387	225.4	-0.614	-0.000614	225.4	-0.609	-0.000609	225.4	-0.5934	-0.0005934		225.4	-0.7111	-0.0007111	225.4	-0.6587	-0.0006587	225.4	-0.6434	-0.0006434	225.4	-0.6373	-0.0006373	225.4	-0.6331	-0.0006331	225.4	-0.6287	-0.0006287		225.4	-0.7111	-0.0007111	225.4	-0.6366	-0.0006366	225.4	-0.6379	-0.0006379	225.4	-0.6315
	225.9	-0.711	-0.000711	225.9	-0.6479	-0.0006479	225.9	-0.6387	-0.0006387	225.9	-0.614	-0.000614	225.9	-0.6091	-0.0006091	225.9	-0.5934	-0.0005934		225.9	-0.711	-0.000711	225.9	-0.6586	-0.0006586	225.9	-0.6434	-0.0006434	225.9	-0.6373	-0.0006373	225.9	-0.6331	-0.0006331	225.9	-0.6287	-0.0006287		225.9	-0.711	-0.000711	225.9	-0.6366	-0.0006366	225.9	-0.638	-0.000638	225.9	-0.6315
	226.4	-0.711	-0.000711	226.4	-0.648	-0.000648	226.4	-0.6387	-0.0006387	226.4	-0.614	-0.000614	226.4	-0.6091	-0.0006091	226.4	-0.5935	-0.0005935		226.4	-0.711	-0.000711	226.4	-0.6586	-0.0006586	226.4	-0.6434	-0.0006434	226.4	-0.6373	-0.0006373	226.4	-0.6331	-0.0006331	226.4	-0.6287	-0.0006287		226.4	-0.711	-0.000711	226.4	-0.6367	-0.0006367	226.4	-0.638	-0.000638	226.4	-0.6314
	226.9	-0.711	-0.000711	226.9	-0.648	-0.000648	226.9	-0.6387	-0.0006387	226.9	-0.614	-0.000614	226.9	-0.6091	-0.0006091	226.9	-0.5935	-0.0005935		226.9	-0.711	-0.000711	226.9	-0.6586	-0.0006586	226.9	-0.6434	-0.0006434	226.9	-0.6373	-0.0006373	226.9	-0.6331	-0.0006331	226.9	-0.6286	-0.0006286		226.9	-0.711	-0.000711	226.9	-0.6368	-0.0006368	226.9	-0.638	-0.000638	226.9	-0.6314
	227.5	-0.711	-0.000711	227.5	-0.648	-0.000648	227.5	-0.6387	-0.0006387	227.5	-0.614	-0.000614	227.5	-0.6092	-0.0006092	227.5	-0.5935	-0.0005935		227.5	-0.711	-0.000711	227.5	-0.6586	-0.0006586	227.5	-0.6434	-0.0006434	227.5	-0.6373	-0.0006373	227.5	-0.6331	-0.0006331	227.5	-0.6286	-0.0006286		227.5	-0.711	-0.000711	227.5	-0.6368	-0.0006368	227.5	-0.638	-0.000638	227.5	-0.6314
	228	-0.711	-0.000711	228	-0.648	-0.000648	228	-0.6388	-0.0006388	228	-0.614	-0.000614	228	-0.6092	-0.0006092	228	-0.5936	-0.0005936		228	-0.711	-0.000711	228	-0.6586	-0.0006586	228	-0.6434	-0.0006434	228	-0.6373	-0.0006373	228	-0.6331	-0.0006331	228	-0.6286	-0.0006286		228	-0.711	-0.000711	228	-0.6369	-0.0006369	228	-0.638	-0.000638	228	-0.6314
	228.5	-0.711	-0.000711	228.5	-0.648	-0.000648	228.5	-0.6388	-0.0006388	228.5	-0.614	-0.000614	228.5	-0.6092	-0.0006092	228.5	-0.5936	-0.0005936		228.5	-0.711	-0.000711	228.5	-0.6586	-0.0006586	228.5	-0.6434	-0.0006434	228.5	-0.6373	-0.0006373	228.5	-0.6331	-0.0006331	228.5	-0.6286	-0.0006286		228.5	-0.711	-0.000711	228.5	-0.637	-0.000637	228.5	-0.638	-0.000638	228.5	-0.6313
	229	-0.7109	-0.0007109	229	-0.648	-0.000648	229	-0.6388	-0.0006388	229	-0.6141	-0.0006141	229	-0.6093	-0.0006093	229	-0.5936	-0.0005936		229	-0.7109	-0.0007109	229	-0.6585	-0.0006585	229	-0.6434	-0.0006434	229	-0.6373	-0.0006373	229	-0.6331	-0.0006331	229	-0.6286	-0.0006286		229	-0.7109	-0.0007109	229	-0.637	-0.000637	229	-0.638	-0.000638	229	-0.6313
	229.5	-0.7109	-0.0007109	229.5	-0.648	-0.000648	229.5	-0.6388	-0.0006388	229.5	-0.6141	-0.0006141	229.5	-0.6093	-0.0006093	229.5	-0.5937	-0.0005937		229.5	-0.7109	-0.0007109	229.5	-0.6585	-0.0006585	229.5	-0.6434	-0.0006434	229.5	-0.6373	-0.0006373	229.5	-0.6331	-0.0006331	229.5	-0.6286	-0.0006286		229.5	-0.7109	-0.0007109	229.5	-0.6371	-0.0006371	229.5	-0.638	-0.000638	229.5	-0.6313
	230	-0.7109	-0.0007109	230	-0.6481	-0.0006481	230	-0.6388	-0.0006388	230	-0.6141	-0.0006141	230	-0.6093	-0.0006093	230	-0.5937	-0.0005937		230	-0.7109	-0.0007109	230	-0.6585	-0.0006585	230	-0.6434	-0.0006434	230	-0.6373	-0.0006373	230	-0.6331	-0.0006331	230	-0.6287	-0.0006287		230	-0.7109	-0.0007109	230	-0.6371	-0.0006371	230	-0.638	-0.000638	230	-0.6313
	230.5	-0.7109	-0.0007109	230.5	-0.6481	-0.0006481	230.5	-0.6388	-0.0006388	230.5	-0.6141	-0.0006141	230.5	-0.6094	-0.0006094	230.5	-0.5937	-0.0005937		230.5	-0.7109	-0.0007109	230.5	-0.6585	-0.0006585	230.5	-0.6434	-0.0006434	230.5	-0.6373	-0.0006373	230.5	-0.6331	-0.0006331	230.5	-0.6287	-0.0006287		230.5	-0.7109	-0.0007109	230.5	-0.6372	-0.0006372	230.5	-0.6379	-0.0006379	230.5	-0.6313
	231	-0.7108	-0.0007108	231	-0.6481	-0.0006481	231	-0.6388	-0.0006388	231	-0.6141	-0.0006141	231	-0.6094	-0.0006094	231	-0.5938	-0.0005938		231	-0.7108	-0.0007108	231	-0.6585	-0.0006585	231	-0.6434	-0.0006434	231	-0.6373	-0.0006373	231	-0.6331	-0.0006331	231	-0.6286	-0.0006286		231	-0.7108	-0.0007108	231	-0.6372	-0.0006372	231	-0.6379	-0.0006379	231	-0.6312
	231.5	-0.7108	-0.0007108	231.5	-0.6481	-0.0006481	231.5	-0.6388	-0.0006388	231.5	-0.614	-0.000614	231.5	-0.6094	-0.0006094	231.5	-0.5938	-0.0005938		231.5	-0.7108	-0.0007108	231.5	-0.6585	-0.0006585	231.5	-0.6434	-0.0006434	231.5	-0.6373	-0.0006373	231.5	-0.6331	-0.0006331	231.5	-0.6286	-0.0006286		231.5	-0.7108	-0.0007108	231.5	-0.6372	-0.0006372	231.5	-0.6379	-0.0006379	231.5	-0.6312
	232.1	-0.7108	-0.0007108	232.1	-0.6481	-0.0006481	232.1	-0.6388	-0.0006388	232.1	-0.6141	-0.0006141	232.1	-0.6095	-0.0006095	232.1	-0.5938	-0.0005938		232.1	-0.7108	-0.0007108	232.1	-0.6585	-0.0006585	232.1	-0.6434	-0.0006434	232.1	-0.6373	-0.0006373	232.1	-0.6331	-0.0006331	232.1	-0.6286	-0.0006286		232.1	-0.7108	-0.0007108	232.1	-0.6372	-0.0006372	232.1	-0.6379	-0.0006379	232.1	-0.6312
	232.6	-0.7107	-0.0007107	232.6	-0.6481	-0.0006481	232.6	-0.6388	-0.0006388	232.6	-0.6141	-0.0006141	232.6	-0.6095	-0.0006095	232.6	-0.5939	-0.0005939		232.6	-0.7107	-0.0007107	232.6	-0.6584	-0.0006584	232.6	-0.6434	-0.0006434	232.6	-0.6373	-0.0006373	232.6	-0.6331	-0.0006331	232.6	-0.6286	-0.0006286		232.6	-0.7107	-0.0007107	232.6	-0.6373	-0.0006373	232.6	-0.6379	-0.0006379	232.6	-0.6311
	233.1	-0.7107	-0.0007107	233.1	-0.6481	-0.0006481	233.1	-0.6388	-0.0006388	233.1	-0.6141	-0.0006141	233.1	-0.6095	-0.0006095	233.1	-0.5939	-0.0005939		233.1	-0.7107	-0.0007107	233.1	-0.6584	-0.0006584	233.1	-0.6434	-0.0006434	233.1	-0.6373	-0.0006373	233.1	-0.633	-0.000633	233.1	-0.6286	-0.0006286		233.1	-0.7107	-0.0007107	233.1	-0.6373	-0.0006373	233.1	-0.6379	-0.0006379	233.1	-0.6311
	233.6	-0.7107	-0.0007107	233.6	-0.6481	-0.0006481	233.6	-0.6388	-0.0006388	233.6	-0.6141	-0.0006141	233.6	-0.6096	-0.0006096	233.6	-0.5939	-0.0005939		233.6	-0.7107	-0.0007107	233.6	-0.6584	-0.0006584	233.6	-0.6434	-0.0006434	233.6	-0.6373	-0.0006373	233.6	-0.633	-0.000633	233.6	-0.6286	-0.0006286		233.6	-0.7107	-0.0007107	233.6	-0.6373	-0.0006373	233.6	-0.6378	-0.0006378	233.6	-0.6311
	234.1	-0.7106	-0.0007106	234.1	-0.6481	-0.0006481	234.1	-0.6388	-0.0006388	234.1	-0.6141	-0.0006141	234.1	-0.6096	-0.0006096	234.1	-0.594	-0.000594		234.1	-0.7106	-0.0007106	234.1	-0.6584	-0.0006584	234.1	-0.6434	-0.0006434	234.1	-0.6373	-0.0006373	234.1	-0.633	-0.000633	234.1	-0.6286	-0.0006286		234.1	-0.7106	-0.0007106	234.1	-0.6374	-0.0006374	234.1	-0.6378	-0.0006378	234.1	-0.6311
	234.6	-0.7106	-0.0007106	234.6	-0.6481	-0.0006481	234.6	-0.6388	-0.0006388	234.6	-0.6142	-0.0006142	234.6	-0.6096	-0.0006096	234.6	-0.594	-0.000594		234.6	-0.7106	-0.0007106	234.6	-0.6584	-0.0006584	234.6	-0.6434	-0.0006434	234.6	-0.6373	-0.0006373	234.6	-0.633	-0.000633	234.6	-0.6286	-0.0006286		234.6	-0.7106	-0.0007106	234.6	-0.6375	-0.0006375	234.6	-0.6378	-0.0006378	234.6	-0.631
	235.1	-0.7106	-0.0007106	235.1	-0.6481	-0.0006481	235.1	-0.6389	-0.0006389	235.1	-0.6142	-0.0006142	235.1	-0.6097	-0.0006097	235.1	-0.594	-0.000594		235.1	-0.7106	-0.0007106	235.1	-0.6584	-0.0006584	235.1	-0.6434	-0.0006434	235.1	-0.6373	-0.0006373	235.1	-0.633	-0.000633	235.1	-0.6286	-0.0006286		235.1	-0.7106	-0.0007106	235.1	-0.6376	-0.0006376	235.1	-0.6378	-0.0006378	235.1	-0.631
	235.6	-0.7106	-0.0007106	235.6	-0.6481	-0.0006481	235.6	-0.6389	-0.0006389	235.6	-0.6142	-0.0006142	235.6	-0.6097	-0.0006097	235.6	-0.5941	-0.0005941		235.6	-0.7106	-0.0007106	235.6	-0.6584	-0.0006584	235.6	-0.6434	-0.0006434	235.6	-0.6373	-0.0006373	235.6	-0.633	-0.000633	235.6	-0.6286	-0.0006286		235.6	-0.7106	-0.0007106	235.6	-0.6376	-0.0006376	235.6	-0.6378	-0.0006378	235.6	-0.631
	236.1	-0.7106	-0.0007106	236.1	-0.6481	-0.0006481	236.1	-0.6389	-0.0006389	236.1	-0.6143	-0.0006143	236.1	-0.6097	-0.0006097	236.1	-0.5941	-0.0005941		236.1	-0.7106	-0.0007106	236.1	-0.6584	-0.0006584	236.1	-0.6434	-0.0006434	236.1	-0.6373	-0.0006373	236.1	-0.633	-0.000633	236.1	-0.6286	-0.0006286		236.1	-0.7106	-0.0007106	236.1	-0.6377	-0.0006377	236.1	-0.6378	-0.0006378	236.1	-0.631
	236.6	-0.7106	-0.0007106	236.6	-0.6481	-0.0006481	236.6	-0.6389	-0.0006389	236.6	-0.6143	-0.0006143	236.6	-0.6098	-0.0006098	236.6	-0.5941	-0.0005941		236.6	-0.7106	-0.0007106	236.6	-0.6583	-0.0006583	236.6	-0.6434	-0.0006434	236.6	-0.6373	-0.0006373	236.6	-0.633	-0.000633	236.6	-0.6286	-0.0006286		236.6	-0.7106	-0.0007106	236.6	-0.6377	-0.0006377	236.6	-0.6378	-0.0006378	236.6	-0.6309
	237.1	-0.7106	-0.0007106	237.1	-0.6481	-0.0006481	237.1	-0.6389	-0.0006389	237.1	-0.6143	-0.0006143	237.1	-0.6098	-0.0006098	237.1	-0.5942	-0.0005942		237.1	-0.7106	-0.0007106	237.1	-0.6583	-0.0006583	237.1	-0.6435	-0.0006435	237.1	-0.6373	-0.0006373	237.1	-0.633	-0.000633	237.1	-0.6286	-0.0006286		237.1	-0.7106	-0.0007106	237.1	-0.6378	-0.0006378	237.1	-0.6378	-0.0006378	237.1	-0.6309
	237.7	-0.7105	-0.0007105	237.7	-0.6481	-0.0006481	237.7	-0.6389	-0.0006389	237.7	-0.6143	-0.0006143	237.7	-0.6098	-0.0006098	237.7	-0.5942	-0.0005942		237.7	-0.7105	-0.0007105	237.7	-0.6583	-0.0006583	237.7	-0.6435	-0.0006435	237.7	-0.6373	-0.0006373	237.7	-0.633	-0.000633	237.7	-0.6286	-0.0006286		237.7	-0.7105	-0.0007105	237.7	-0.6379	-0.0006379	237.7	-0.6378	-0.0006378	237.7	-0.6309
	238.2	-0.7105	-0.0007105	238.2	-0.6481	-0.0006481	238.2	-0.6389	-0.0006389	238.2	-0.6143	-0.0006143	238.2	-0.6098	-0.0006098	238.2	-0.5942	-0.0005942		238.2	-0.7105	-0.0007105	238.2	-0.6583	-0.0006583	238.2	-0.6435	-0.0006435	238.2	-0.6373	-0.0006373	238.2	-0.633	-0.000633	238.2	-0.6286	-0.0006286		238.2	-0.7105	-0.0007105	238.2	-0.6379	-0.0006379	238.2	-0.6377	-0.0006377	238.2	-0.6309
	238.7	-0.7105	-0.0007105	238.7	-0.6481	-0.0006481	238.7	-0.6389	-0.0006389	238.7	-0.6144	-0.0006144	238.7	-0.6099	-0.0006099	238.7	-0.5943	-0.0005943		238.7	-0.7105	-0.0007105	238.7	-0.6583	-0.0006583	238.7	-0.6435	-0.0006435	238.7	-0.6373	-0.0006373	238.7	-0.633	-0.000633	238.7	-0.6286	-0.0006286		238.7	-0.7105	-0.0007105	238.7	-0.638	-0.000638	238.7	-0.6377	-0.0006377	238.7	-0.6309
	239.2	-0.7105	-0.0007105	239.2	-0.6481	-0.0006481	239.2	-0.6389	-0.0006389	239.2	-0.6143	-0.0006143	239.2	-0.6099	-0.0006099	239.2	-0.5943	-0.0005943		239.2	-0.7105	-0.0007105	239.2	-0.6583	-0.0006583	239.2	-0.6435	-0.0006435	239.2	-0.6373	-0.0006373	239.2	-0.633	-0.000633	239.2	-0.6286	-0.0006286		239.2	-0.7105	-0.0007105	239.2	-0.6381	-0.0006381	239.2	-0.6377	-0.0006377	239.2	-0.6309
	239.7	-0.7104	-0.0007104	239.7	-0.6481	-0.0006481	239.7	-0.6389	-0.0006389	239.7	-0.6143	-0.0006143	239.7	-0.6099	-0.0006099	239.7	-0.5943	-0.0005943		239.7	-0.7104	-0.0007104	239.7	-0.6583	-0.0006583	239.7	-0.6435	-0.0006435	239.7	-0.6373	-0.0006373	239.7	-0.633	-0.000633	239.7	-0.6286	-0.0006286		239.7	-0.7104	-0.0007104	239.7	-0.6381	-0.0006381	239.7	-0.6377	-0.0006377	239.7	-0.6308
	240.2	-0.7104	-0.0007104	240.2	-0.6481	-0.0006481	240.2	-0.6389	-0.0006389	240.2	-0.6143	-0.0006143	240.2	-0.61	-0.00061	240.2	-0.5943	-0.0005943		240.2	-0.7104	-0.0007104	240.2	-0.6582	-0.0006582	240.2	-0.6435	-0.0006435	240.2	-0.6373	-0.0006373	240.2	-0.633	-0.000633	240.2	-0.6286	-0.0006286		240.2	-0.7104	-0.0007104	240.2	-0.6381	-0.0006381	240.2	-0.6377	-0.0006377	240.2	-0.6308
	240.7	-0.7104	-0.0007104	240.7	-0.6481	-0.0006481	240.7	-0.6389	-0.0006389	240.7	-0.6143	-0.0006143	240.7	-0.61	-0.00061	240.7	-0.5944	-0.0005944		240.7	-0.7104	-0.0007104	240.7	-0.6582	-0.0006582	240.7	-0.6435	-0.0006435	240.7	-0.6373	-0.0006373	240.7	-0.633	-0.000633	240.7	-0.6286	-0.0006286		240.7	-0.7104	-0.0007104	240.7	-0.6381	-0.0006381	240.7	-0.6377	-0.0006377	240.7	-0.6308
	241.2	-0.7104	-0.0007104	241.2	-0.6481	-0.0006481	241.2	-0.6389	-0.0006389	241.2	-0.6143	-0.0006143	241.2	-0.61	-0.00061	241.2	-0.5944	-0.0005944		241.2	-0.7104	-0.0007104	241.2	-0.6582	-0.0006582	241.2	-0.6435	-0.0006435	241.2	-0.6373	-0.0006373	241.2	-0.633	-0.000633	241.2	-0.6286	-0.0006286		241.2	-0.7104	-0.0007104	241.2	-0.6382	-0.0006382	241.2	-0.6377	-0.0006377	241.2	-0.6308
	241.7	-0.7104	-0.0007104	241.7	-0.6481	-0.0006481	241.7	-0.6389	-0.0006389	241.7	-0.6143	-0.0006143	241.7	-0.6101	-0.0006101	241.7	-0.5944	-0.0005944		241.7	-0.7104	-0.0007104	241.7	-0.6582	-0.0006582	241.7	-0.6435	-0.0006435	241.7	-0.6373	-0.0006373	241.7	-0.633	-0.000633	241.7	-0.6286	-0.0006286		241.7	-0.7104	-0.0007104	241.7	-0.6382	-0.0006382	241.7	-0.6377	-0.0006377	241.7	-0.6307
	242.3	-0.7104	-0.0007104	242.3	-0.6481	-0.0006481	242.3	-0.6389	-0.0006389	242.3	-0.6143	-0.0006143	242.3	-0.6101	-0.0006101	242.3	-0.5945	-0.0005945		242.3	-0.7104	-0.0007104	242.3	-0.6582	-0.0006582	242.3	-0.6435	-0.0006435	242.3	-0.6372	-0.0006372	242.3	-0.633	-0.000633	242.3	-0.6286	-0.0006286		242.3	-0.7104	-0.0007104	242.3	-0.6383	-0.0006383	242.3	-0.6377	-0.0006377	242.3	-0.6307
	242.8	-0.7104	-0.0007104	242.8	-0.6481	-0.0006481	242.8	-0.6389	-0.0006389	242.8	-0.6143	-0.0006143	242.8	-0.6101	-0.0006101	242.8	-0.5945	-0.0005945		242.8	-0.7104	-0.0007104	242.8	-0.6582	-0.0006582	242.8	-0.6435	-0.0006435	242.8	-0.6372	-0.0006372	242.8	-0.633	-0.000633	242.8	-0.6286	-0.0006286		242.8	-0.7104	-0.0007104	242.8	-0.6384	-0.0006384	242.8	-0.6377	-0.0006377	242.8	-0.6307
	243.3	-0.7103	-0.0007103	243.3	-0.6481	-0.0006481	243.3	-0.6389	-0.0006389	243.3	-0.6143	-0.0006143	243.3	-0.6102	-0.0006102	243.3	-0.5945	-0.0005945		243.3	-0.7103	-0.0007103	243.3	-0.6582	-0.0006582	243.3	-0.6435	-0.0006435	243.3	-0.6372	-0.0006372	243.3	-0.633	-0.000633	243.3	-0.6286	-0.0006286		243.3	-0.7103	-0.0007103	243.3	-0.6384	-0.0006384	243.3	-0.6377	-0.0006377	243.3	-0.6307
	243.8	-0.7103	-0.0007103	243.8	-0.6481	-0.0006481	243.8	-0.6389	-0.0006389	243.8	-0.6144	-0.0006144	243.8	-0.6102	-0.0006102	243.8	-0.5946	-0.0005946		243.8	-0.7103	-0.0007103	243.8	-0.6582	-0.0006582	243.8	-0.6435	-0.0006435	243.8	-0.6372	-0.0006372	243.8	-0.633	-0.000633	243.8	-0.6286	-0.0006286		243.8	-0.7103	-0.0007103	243.8	-0.6385	-0.0006385	243.8	-0.6377	-0.0006377	243.8	-0.6306
	244.3	-0.7103	-0.0007103	244.3	-0.6481	-0.0006481	244.3	-0.6389	-0.0006389	244.3	-0.6144	-0.0006144	244.3	-0.6102	-0.0006102	244.3	-0.5946	-0.0005946		244.3	-0.7103	-0.0007103	244.3	-0.6582	-0.0006582	244.3	-0.6435	-0.0006435	244.3	-0.6372	-0.0006372	244.3	-0.633	-0.000633	244.3	-0.6286	-0.0006286		244.3	-0.7103	-0.0007103	244.3	-0.6386	-0.0006386	244.3	-0.6377	-0.0006377	244.3	-0.6306
	244.8	-0.7102	-0.0007102	244.8	-0.6481	-0.0006481	244.8	-0.639	-0.000639	244.8	-0.6144	-0.0006144	244.8	-0.6102	-0.0006102	244.8	-0.5946	-0.0005946		244.8	-0.7102	-0.0007102	244.8	-0.6582	-0.0006582	244.8	-0.6435	-0.0006435	244.8	-0.6372	-0.0006372	244.8	-0.633	-0.000633	244.8	-0.6286	-0.0006286		244.8	-0.7102	-0.0007102	244.8	-0.6386	-0.0006386	244.8	-0.6377	-0.0006377	244.8	-0.6306
	245.3	-0.7102	-0.0007102	245.3	-0.6481	-0.0006481	245.3	-0.639	-0.000639	245.3	-0.6145	-0.0006145	245.3	-0.6103	-0.0006103	245.3	-0.5947	-0.0005947		245.3	-0.7102	-0.0007102	245.3	-0.6581	-0.0006581	245.3	-0.6435	-0.0006435	245.3	-0.6372	-0.0006372	245.3	-0.633	-0.000633	245.3	-0.6286	-0.0006286		245.3	-0.7102	-0.0007102	245.3	-0.6387	-0.0006387	245.3	-0.6377	-0.0006377	245.3	-0.6306
	245.8	-0.7102	-0.0007102	245.8	-0.6481	-0.0006481	245.8	-0.639	-0.000639	245.8	-0.6145	-0.0006145	245.8	-0.6103	-0.0006103	245.8	-0.5947	-0.0005947		245.8	-0.7102	-0.0007102	245.8	-0.6581	-0.0006581	245.8	-0.6435	-0.0006435	245.8	-0.6372	-0.0006372	245.8	-0.6329	-0.0006329	245.8	-0.6286	-0.0006286		245.8	-0.7102	-0.0007102	245.8	-0.6387	-0.0006387	245.8	-0.6377	-0.0006377	245.8	-0.6306
	246.3	-0.7102	-0.0007102	246.3	-0.6481	-0.0006481	246.3	-0.639	-0.000639	246.3	-0.6145	-0.0006145	246.3	-0.6103	-0.0006103	246.3	-0.5947	-0.0005947		246.3	-0.7102	-0.0007102	246.3	-0.6581	-0.0006581	246.3	-0.6435	-0.0006435	246.3	-0.6372	-0.0006372	246.3	-0.6329	-0.0006329	246.3	-0.6286	-0.0006286		246.3	-0.7102	-0.0007102	246.3	-0.6388	-0.0006388	246.3	-0.6377	-0.0006377	246.3	-0.6305
	246.8	-0.7101	-0.0007101	246.8	-0.6481	-0.0006481	246.8	-0.639	-0.000639	246.8	-0.6145	-0.0006145	246.8	-0.6104	-0.0006104	246.8	-0.5948	-0.0005948		246.8	-0.7101	-0.0007101	246.8	-0.6581	-0.0006581	246.8	-0.6435	-0.0006435	246.8	-0.6372	-0.0006372	246.8	-0.6329	-0.0006329	246.8	-0.6286	-0.0006286		246.8	-0.7101	-0.0007101	246.8	-0.6388	-0.0006388	246.8	-0.6377	-0.0006377	246.8	-0.6305
	247.4	-0.7101	-0.0007101	247.4	-0.6481	-0.0006481	247.4	-0.639	-0.000639	247.4	-0.6145	-0.0006145	247.4	-0.6104	-0.0006104	247.4	-0.5948	-0.0005948		247.4	-0.7101	-0.0007101	247.4	-0.6581	-0.0006581	247.4	-0.6435	-0.0006435	247.4	-0.6372	-0.0006372	247.4	-0.6329	-0.0006329	247.4	-0.6286	-0.0006286		247.4	-0.7101	-0.0007101	247.4	-0.6389	-0.0006389	247.4	-0.6377	-0.0006377	247.4	-0.6305
	247.9	-0.7101	-0.0007101	247.9	-0.6481	-0.0006481	247.9	-0.639	-0.000639	247.9	-0.6144	-0.0006144	247.9	-0.6104	-0.0006104	247.9	-0.5948	-0.0005948		247.9	-0.7101	-0.0007101	247.9	-0.6581	-0.0006581	247.9	-0.6435	-0.0006435	247.9	-0.6372	-0.0006372	247.9	-0.6329	-0.0006329	247.9	-0.6286	-0.0006286		247.9	-0.7101	-0.0007101	247.9	-0.6389	-0.0006389	247.9	-0.6377	-0.0006377	247.9	-0.6304
	248.4	-0.7101	-0.0007101	248.4	-0.6481	-0.0006481	248.4	-0.639	-0.000639	248.4	-0.6144	-0.0006144	248.4	-0.6104	-0.0006104	248.4	-0.5948	-0.0005948		248.4	-0.7101	-0.0007101	248.4	-0.6581	-0.0006581	248.4	-0.6435	-0.0006435	248.4	-0.6372	-0.0006372	248.4	-0.6329	-0.0006329	248.4	-0.6286	-0.0006286		248.4	-0.7101	-0.0007101	248.4	-0.639	-0.000639	248.4	-0.6377	-0.0006377	248.4	-0.6304
	248.9	-0.71	-0.00071	248.9	-0.6481	-0.0006481	248.9	-0.639	-0.000639	248.9	-0.6144	-0.0006144	248.9	-0.6105	-0.0006105	248.9	-0.5949	-0.0005949		248.9	-0.71	-0.00071	248.9	-0.6581	-0.0006581	248.9	-0.6435	-0.0006435	248.9	-0.6372	-0.0006372	248.9	-0.6329	-0.0006329	248.9	-0.6286	-0.0006286		248.9	-0.71	-0.00071	248.9	-0.6391	-0.0006391	248.9	-0.6377	-0.0006377	248.9	-0.6304
	249.4	-0.71	-0.00071	249.4	-0.6481	-0.0006481	249.4	-0.639	-0.000639	249.4	-0.6145	-0.0006145	249.4	-0.6105	-0.0006105	249.4	-0.5949	-0.0005949		249.4	-0.71	-0.00071	249.4	-0.658	-0.000658	249.4	-0.6435	-0.0006435	249.4	-0.6372	-0.0006372	249.4	-0.6329	-0.0006329	249.4	-0.6286	-0.0006286		249.4	-0.71	-0.00071	249.4	-0.6391	-0.0006391	249.4	-0.6377	-0.0006377	249.4	-0.6304
	249.9	-0.71	-0.00071	249.9	-0.6481	-0.0006481	249.9	-0.639	-0.000639	249.9	-0.6145	-0.0006145	249.9	-0.6105	-0.0006105	249.9	-0.5949	-0.0005949		249.9	-0.71	-0.00071	249.9	-0.658	-0.000658	249.9	-0.6435	-0.0006435	249.9	-0.6372	-0.0006372	249.9	-0.6329	-0.0006329	249.9	-0.6286	-0.0006286		249.9	-0.71	-0.00071	249.9	-0.6391	-0.0006391	249.9	-0.6377	-0.0006377	249.9	-0.6304
	250.4	-0.71	-0.00071	250.4	-0.6481	-0.0006481	250.4	-0.639	-0.000639	250.4	-0.6146	-0.0006146	250.4	-0.6105	-0.0006105	250.4	-0.595	-0.000595		250.4	-0.71	-0.00071	250.4	-0.658	-0.000658	250.4	-0.6435	-0.0006435	250.4	-0.6372	-0.0006372	250.4	-0.6329	-0.0006329	250.4	-0.6286	-0.0006286		250.4	-0.71	-0.00071	250.4	-0.6392	-0.0006392	250.4	-0.6377	-0.0006377	250.4	-0.6303
	250.9	-0.71	-0.00071	250.9	-0.6481	-0.0006481	250.9	-0.639	-0.000639	250.9	-0.6146	-0.0006146	250.9	-0.6106	-0.0006106	250.9	-0.595	-0.000595		250.9	-0.71	-0.00071	250.9	-0.658	-0.000658	250.9	-0.6435	-0.0006435	250.9	-0.6372	-0.0006372	250.9	-0.6329	-0.0006329	250.9	-0.6286	-0.0006286		250.9	-0.71	-0.00071	250.9	-0.6392	-0.0006392	250.9	-0.6377	-0.0006377	250.9	-0.6303
	251.4	-0.7099	-0.0007099	251.4	-0.6481	-0.0006481	251.4	-0.639	-0.000639	251.4	-0.6147	-0.0006147	251.4	-0.6106	-0.0006106	251.4	-0.595	-0.000595		251.4	-0.7099	-0.0007099	251.4	-0.658	-0.000658	251.4	-0.6435	-0.0006435	251.4	-0.6372	-0.0006372	251.4	-0.6329	-0.0006329	251.4	-0.6286	-0.0006286		251.4	-0.7099	-0.0007099	251.4	-0.6393	-0.0006393	251.4	-0.6377	-0.0006377	251.4	-0.6303
	251.9	-0.7099	-0.0007099	251.9	-0.6481	-0.0006481	251.9	-0.639	-0.000639	251.9	-0.6147	-0.0006147	251.9	-0.6106	-0.0006106	251.9	-0.595	-0.000595		251.9	-0.7099	-0.0007099	251.9	-0.658	-0.000658	251.9	-0.6435	-0.0006435	251.9	-0.6372	-0.0006372	251.9	-0.6329	-0.0006329	251.9	-0.6286	-0.0006286		251.9	-0.7099	-0.0007099	251.9	-0.6393	-0.0006393	251.9	-0.6377	-0.0006377	251.9	-0.6303
	252.4	-0.7099	-0.0007099	252.4	-0.6481	-0.0006481	252.4	-0.639	-0.000639	252.4	-0.6147	-0.0006147	252.4	-0.6107	-0.0006107	252.4	-0.5951	-0.0005951		252.4	-0.7099	-0.0007099	252.4	-0.658	-0.000658	252.4	-0.6435	-0.0006435	252.4	-0.6372	-0.0006372	252.4	-0.6329	-0.0006329	252.4	-0.6286	-0.0006286		252.4	-0.7099	-0.0007099	252.4	-0.6393	-0.0006393	252.4	-0.6377	-0.0006377	252.4	-0.6302
	253	-0.7098	-0.0007098	253	-0.6481	-0.0006481	253	-0.6391	-0.0006391	253	-0.6147	-0.0006147	253	-0.6107	-0.0006107	253	-0.5951	-0.0005951		253	-0.7098	-0.0007098	253	-0.658	-0.000658	253	-0.6435	-0.0006435	253	-0.6372	-0.0006372	253	-0.6329	-0.0006329	253	-0.6286	-0.0006286		253	-0.7098	-0.0007098	253	-0.6394	-0.0006394	253	-0.6377	-0.0006377	253	-0.6302
	253.5	-0.7098	-0.0007098	253.5	-0.6481	-0.0006481	253.5	-0.6391	-0.0006391	253.5	-0.6147	-0.0006147	253.5	-0.6107	-0.0006107	253.5	-0.5951	-0.0005951		253.5	-0.7098	-0.0007098	253.5	-0.6579	-0.0006579	253.5	-0.6436	-0.0006436	253.5	-0.6372	-0.0006372	253.5	-0.6329	-0.0006329	253.5	-0.6286	-0.0006286		253.5	-0.7098	-0.0007098	253.5	-0.6395	-0.0006395	253.5	-0.6377	-0.0006377	253.5	-0.6302
	254	-0.7098	-0.0007098	254	-0.6481	-0.0006481	254	-0.6391	-0.0006391	254	-0.6147	-0.0006147	254	-0.6108	-0.0006108	254	-0.5951	-0.0005951		254	-0.7098	-0.0007098	254	-0.6579	-0.0006579	254	-0.6436	-0.0006436	254	-0.6372	-0.0006372	254	-0.6329	-0.0006329	254	-0.6286	-0.0006286		254	-0.7098	-0.0007098	254	-0.6395	-0.0006395	254	-0.6377	-0.0006377	254	-0.6302
	254.5	-0.7098	-0.0007098	254.5	-0.6481	-0.0006481	254.5	-0.6391	-0.0006391	254.5	-0.6147	-0.0006147	254.5	-0.6108	-0.0006108	254.5	-0.5952	-0.0005952		254.5	-0.7098	-0.0007098	254.5	-0.6579	-0.0006579	254.5	-0.6436	-0.0006436	254.5	-0.6372	-0.0006372	254.5	-0.6329	-0.0006329	254.5	-0.6286	-0.0006286		254.5	-0.7098	-0.0007098	254.5	-0.6396	-0.0006396	254.5	-0.6377	-0.0006377	254.5	-0.6302
	255	-0.7098	-0.0007098	255	-0.6481	-0.0006481	255	-0.6391	-0.0006391	255	-0.6147	-0.0006147	255	-0.6108	-0.0006108	255	-0.5952	-0.0005952		255	-0.7098	-0.0007098	255	-0.6579	-0.0006579	255	-0.6436	-0.0006436	255	-0.6372	-0.0006372	255	-0.6329	-0.0006329	255	-0.6286	-0.0006286		255	-0.7098	-0.0007098	255	-0.6396	-0.0006396	255	-0.6377	-0.0006377	255	-0.6301
	255.5	-0.7098	-0.0007098	255.5	-0.6481	-0.0006481	255.5	-0.6391	-0.0006391	255.5	-0.6147	-0.0006147	255.5	-0.6109	-0.0006109	255.5	-0.5952	-0.0005952		255.5	-0.7098	-0.0007098	255.5	-0.6579	-0.0006579	255.5	-0.6436	-0.0006436	255.5	-0.6372	-0.0006372	255.5	-0.6329	-0.0006329	255.5	-0.6286	-0.0006286		255.5	-0.7098	-0.0007098	255.5	-0.6396	-0.0006396	255.5	-0.6377	-0.0006377	255.5	-0.6301
	256	-0.7098	-0.0007098	256	-0.6481	-0.0006481	256	-0.6391	-0.0006391	256	-0.6148	-0.0006148	256	-0.6109	-0.0006109	256	-0.5952	-0.0005952		256	-0.7098	-0.0007098	256	-0.6579	-0.0006579	256	-0.6436	-0.0006436	256	-0.6372	-0.0006372	256	-0.6329	-0.0006329	256	-0.6286	-0.0006286		256	-0.7098	-0.0007098	256	-0.6396	-0.0006396	256	-0.6377	-0.0006377	256	-0.6301
	256.5	-0.7098	-0.0007098	256.5	-0.6481	-0.0006481	256.5	-0.6391	-0.0006391	256.5	-0.6148	-0.0006148	256.5	-0.6109	-0.0006109	256.5	-0.5953	-0.0005953		256.5	-0.7098	-0.0007098	256.5	-0.6579	-0.0006579	256.5	-0.6436	-0.0006436	256.5	-0.6372	-0.0006372	256.5	-0.6329	-0.0006329	256.5	-0.6286	-0.0006286		256.5	-0.7098	-0.0007098	256.5	-0.6397	-0.0006397	256.5	-0.6377	-0.0006377	256.5	-0.6301
	257	-0.7098	-0.0007098	257	-0.6481	-0.0006481	257	-0.6391	-0.0006391	257	-0.6148	-0.0006148	257	-0.6109	-0.0006109	257	-0.5953	-0.0005953		257	-0.7098	-0.0007098	257	-0.6579	-0.0006579	257	-0.6436	-0.0006436	257	-0.6372	-0.0006372	257	-0.6329	-0.0006329	257	-0.6286	-0.0006286		257	-0.7098	-0.0007098	257	-0.6397	-0.0006397	257	-0.6377	-0.0006377	257	-0.6301
	257.5	-0.7097	-0.0007097	257.5	-0.6481	-0.0006481	257.5	-0.6391	-0.0006391	257.5	-0.6147	-0.0006147	257.5	-0.611	-0.000611	257.5	-0.5953	-0.0005953		257.5	-0.7097	-0.0007097	257.5	-0.6578	-0.0006578	257.5	-0.6436	-0.0006436	257.5	-0.6372	-0.0006372	257.5	-0.6329	-0.0006329	257.5	-0.6286	-0.0006286		257.5	-0.7097	-0.0007097	257.5	-0.6397	-0.0006397	257.5	-0.6377	-0.0006377	257.5	-0.6301
	258.1	-0.7097	-0.0007097	258.1	-0.6481	-0.0006481	258.1	-0.6391	-0.0006391	258.1	-0.6147	-0.0006147	258.1	-0.611	-0.000611	258.1	-0.5953	-0.0005953		258.1	-0.7097	-0.0007097	258.1	-0.6578	-0.0006578	258.1	-0.6436	-0.0006436	258.1	-0.6372	-0.0006372	258.1	-0.6329	-0.0006329	258.1	-0.6286	-0.0006286		258.1	-0.7097	-0.0007097	258.1	-0.6398	-0.0006398	258.1	-0.6377	-0.0006377	258.1	-0.63
	258.6	-0.7097	-0.0007097	258.6	-0.6481	-0.0006481	258.6	-0.6391	-0.0006391	258.6	-0.6147	-0.0006147	258.6	-0.611	-0.000611	258.6	-0.5954	-0.0005954		258.6	-0.7097	-0.0007097	258.6	-0.6578	-0.0006578	258.6	-0.6436	-0.0006436	258.6	-0.6372	-0.0006372	258.6	-0.6329	-0.0006329	258.6	-0.6286	-0.0006286		258.6	-0.7097	-0.0007097	258.6	-0.6398	-0.0006398	258.6	-0.6377	-0.0006377	258.6	-0.63
	259.1	-0.7096	-0.0007096	259.1	-0.6481	-0.0006481	259.1	-0.6391	-0.0006391	259.1	-0.6147	-0.0006147	259.1	-0.6111	-0.0006111	259.1	-0.5954	-0.0005954		259.1	-0.7096	-0.0007096	259.1	-0.6578	-0.0006578	259.1	-0.6436	-0.0006436	259.1	-0.6372	-0.0006372	259.1	-0.6329	-0.0006329	259.1	-0.6286	-0.0006286		259.1	-0.7096	-0.0007096	259.1	-0.6399	-0.0006399	259.1	-0.6377	-0.0006377	259.1	-0.63
	259.6	-0.7096	-0.0007096	259.6	-0.6481	-0.0006481	259.6	-0.6391	-0.0006391	259.6	-0.6147	-0.0006147	259.6	-0.6111	-0.0006111	259.6	-0.5954	-0.0005954		259.6	-0.7096	-0.0007096	259.6	-0.6578	-0.0006578	259.6	-0.6436	-0.0006436	259.6	-0.6372	-0.0006372	259.6	-0.6329	-0.0006329	259.6	-0.6286	-0.0006286		259.6	-0.7096	-0.0007096	259.6	-0.6399	-0.0006399	259.6	-0.6377	-0.0006377	259.6	-0.63
	260.1	-0.7096	-0.0007096	260.1	-0.6481	-0.0006481	260.1	-0.6391	-0.0006391	260.1	-0.6147	-0.0006147	260.1	-0.6111	-0.0006111	260.1	-0.5954	-0.0005954		260.1	-0.7096	-0.0007096	260.1	-0.6578	-0.0006578	260.1	-0.6436	-0.0006436	260.1	-0.6372	-0.0006372	260.1	-0.6329	-0.0006329	260.1	-0.6287	-0.0006287		260.1	-0.7096	-0.0007096	260.1	-0.64	-0.00064	260.1	-0.6377	-0.0006377	260.1	-0.63
	260.6	-0.7096	-0.0007096	260.6	-0.6481	-0.0006481	260.6	-0.6391	-0.0006391	260.6	-0.6147	-0.0006147	260.6	-0.6112	-0.0006112	260.6	-0.5955	-0.0005955		260.6	-0.7096	-0.0007096	260.6	-0.6578	-0.0006578	260.6	-0.6436	-0.0006436	260.6	-0.6372	-0.0006372	260.6	-0.6329	-0.0006329	260.6	-0.6287	-0.0006287		260.6	-0.7096	-0.0007096	260.6	-0.64	-0.00064	260.6	-0.6377	-0.0006377	260.6	-0.63
	261.1	-0.7096	-0.0007096	261.1	-0.6481	-0.0006481	261.1	-0.6391	-0.0006391	261.1	-0.6147	-0.0006147	261.1	-0.6112	-0.0006112	261.1	-0.5955	-0.0005955		261.1	-0.7096	-0.0007096	261.1	-0.6578	-0.0006578	261.1	-0.6436	-0.0006436	261.1	-0.6372	-0.0006372	261.1	-0.6329	-0.0006329	261.1	-0.6287	-0.0006287		261.1	-0.7096	-0.0007096	261.1	-0.6401	-0.0006401	261.1	-0.6377	-0.0006377	261.1	-0.6299
	261.6	-0.7096	-0.0007096	261.6	-0.6481	-0.0006481	261.6	-0.6391	-0.0006391	261.6	-0.6147	-0.0006147	261.6	-0.6112	-0.0006112	261.6	-0.5955	-0.0005955		261.6	-0.7096	-0.0007096	261.6	-0.6578	-0.0006578	261.6	-0.6436	-0.0006436	261.6	-0.6372	-0.0006372	261.6	-0.6329	-0.0006329	261.6	-0.6287	-0.0006287		261.6	-0.7096	-0.0007096	261.6	-0.6401	-0.0006401	261.6	-0.6377	-0.0006377	261.6	-0.6299
	262.1	-0.7097	-0.0007097	262.1	-0.6481	-0.0006481	262.1	-0.6391	-0.0006391	262.1	-0.6147	-0.0006147	262.1	-0.6112	-0.0006112	262.1	-0.5956	-0.0005956		262.1	-0.7097	-0.0007097	262.1	-0.6578	-0.0006578	262.1	-0.6436	-0.0006436	262.1	-0.6372	-0.0006372	262.1	-0.6329	-0.0006329	262.1	-0.6287	-0.0006287		262.1	-0.7097	-0.0007097	262.1	-0.6401	-0.0006401	262.1	-0.6377	-0.0006377	262.1	-0.6299
	262.6	-0.7097	-0.0007097	262.6	-0.6481	-0.0006481	262.6	-0.6391	-0.0006391	262.6	-0.6147	-0.0006147	262.6	-0.6113	-0.0006113	262.6	-0.5956	-0.0005956		262.6	-0.7097	-0.0007097	262.6	-0.6578	-0.0006578	262.6	-0.6436	-0.0006436	262.6	-0.6372	-0.0006372	262.6	-0.6329	-0.0006329	262.6	-0.6287	-0.0006287		262.6	-0.7097	-0.0007097	262.6	-0.6401	-0.0006401	262.6	-0.6377	-0.0006377	262.6	-0.6299
	263.2	-0.7097	-0.0007097	263.2	-0.6481	-0.0006481	263.2	-0.6391	-0.0006391	263.2	-0.6148	-0.0006148	263.2	-0.6113	-0.0006113	263.2	-0.5956	-0.0005956		263.2	-0.7097	-0.0007097	263.2	-0.6578	-0.0006578	263.2	-0.6436	-0.0006436	263.2	-0.6372	-0.0006372	263.2	-0.6329	-0.0006329	263.2	-0.6287	-0.0006287		263.2	-0.7097	-0.0007097	263.2	-0.6402	-0.0006402	263.2	-0.6377	-0.0006377	263.2	-0.6299
	263.7	-0.7097	-0.0007097	263.7	-0.6481	-0.0006481	263.7	-0.6391	-0.0006391	263.7	-0.6148	-0.0006148	263.7	-0.6113	-0.0006113	263.7	-0.5956	-0.0005956		263.7	-0.7097	-0.0007097	263.7	-0.6577	-0.0006577	263.7	-0.6436	-0.0006436	263.7	-0.6372	-0.0006372	263.7	-0.6329	-0.0006329	263.7	-0.6287	-0.0006287		263.7	-0.7097	-0.0007097	263.7	-0.6402	-0.0006402	263.7	-0.6377	-0.0006377	263.7	-0.6299
	264.2	-0.7097	-0.0007097	264.2	-0.6481	-0.0006481	264.2	-0.6391	-0.0006391	264.2	-0.6148	-0.0006148	264.2	-0.6114	-0.0006114	264.2	-0.5956	-0.0005956		264.2	-0.7097	-0.0007097	264.2	-0.6577	-0.0006577	264.2	-0.6436	-0.0006436	264.2	-0.6372	-0.0006372	264.2	-0.6329	-0.0006329	264.2	-0.6287	-0.0006287		264.2	-0.7097	-0.0007097	264.2	-0.6403	-0.0006403	264.2	-0.6377	-0.0006377	264.2	-0.6299
	264.7	-0.7097	-0.0007097	264.7	-0.6482	-0.0006482	264.7	-0.6391	-0.0006391	264.7	-0.6148	-0.0006148	264.7	-0.6114	-0.0006114	264.7	-0.5957	-0.0005957		264.7	-0.7097	-0.0007097	264.7	-0.6577	-0.0006577	264.7	-0.6436	-0.0006436	264.7	-0.6372	-0.0006372	264.7	-0.6329	-0.0006329	264.7	-0.6287	-0.0006287		264.7	-0.7097	-0.0007097	264.7	-0.6403	-0.0006403	264.7	-0.6377	-0.0006377	264.7	-0.6299
	265.2	-0.7096	-0.0007096	265.2	-0.6482	-0.0006482	265.2	-0.6392	-0.0006392	265.2	-0.6148	-0.0006148	265.2	-0.6114	-0.0006114	265.2	-0.5957	-0.0005957		265.2	-0.7096	-0.0007096	265.2	-0.6577	-0.0006577	265.2	-0.6437	-0.0006437	265.2	-0.6372	-0.0006372	265.2	-0.6329	-0.0006329	265.2	-0.6287	-0.0006287		265.2	-0.7096	-0.0007096	265.2	-0.6404	-0.0006404	265.2	-0.6377	-0.0006377	265.2	-0.6298
	265.7	-0.7096	-0.0007096	265.7	-0.6482	-0.0006482	265.7	-0.6392	-0.0006392	265.7	-0.6148	-0.0006148	265.7	-0.6114	-0.0006114	265.7	-0.5957	-0.0005957		265.7	-0.7096	-0.0007096	265.7	-0.6577	-0.0006577	265.7	-0.6437	-0.0006437	265.7	-0.6372	-0.0006372	265.7	-0.6328	-0.0006328	265.7	-0.6287	-0.0006287		265.7	-0.7096	-0.0007096	265.7	-0.6404	-0.0006404	265.7	-0.6377	-0.0006377	265.7	-0.6298
	266.2	-0.7096	-0.0007096	266.2	-0.6482	-0.0006482	266.2	-0.6392	-0.0006392	266.2	-0.6149	-0.0006149	266.2	-0.6115	-0.0006115	266.2	-0.5957	-0.0005957		266.2	-0.7096	-0.0007096	266.2	-0.6577	-0.0006577	266.2	-0.6437	-0.0006437	266.2	-0.6371	-0.0006371	266.2	-0.6328	-0.0006328	266.2	-0.6287	-0.0006287		266.2	-0.7096	-0.0007096	266.2	-0.6404	-0.0006404	266.2	-0.6377	-0.0006377	266.2	-0.6298
	266.7	-0.7096	-0.0007096	266.7	-0.6482	-0.0006482	266.7	-0.6392	-0.0006392	266.7	-0.6149	-0.0006149	266.7	-0.6115	-0.0006115	266.7	-0.5958	-0.0005958		266.7	-0.7096	-0.0007096	266.7	-0.6577	-0.0006577	266.7	-0.6437	-0.0006437	266.7	-0.6371	-0.0006371	266.7	-0.6328	-0.0006328	266.7	-0.6287	-0.0006287		266.7	-0.7096	-0.0007096	266.7	-0.6405	-0.0006405	266.7	-0.6377	-0.0006377	266.7	-0.6298
	267.2	-0.7096	-0.0007096	267.2	-0.6482	-0.0006482	267.2	-0.6392	-0.0006392	267.2	-0.6149	-0.0006149	267.2	-0.6115	-0.0006115	267.2	-0.5958	-0.0005958		267.2	-0.7096	-0.0007096	267.2	-0.6577	-0.0006577	267.2	-0.6437	-0.0006437	267.2	-0.6371	-0.0006371	267.2	-0.6328	-0.0006328	267.2	-0.6287	-0.0006287		267.2	-0.7096	-0.0007096	267.2	-0.6405	-0.0006405	267.2	-0.6377	-0.0006377	267.2	-0.6298
	267.8	-0.7095	-0.0007095	267.8	-0.6482	-0.0006482	267.8	-0.6392	-0.0006392	267.8	-0.6149	-0.0006149	267.8	-0.6116	-0.0006116	267.8	-0.5958	-0.0005958		267.8	-0.7095	-0.0007095	267.8	-0.6577	-0.0006577	267.8	-0.6437	-0.0006437	267.8	-0.6371	-0.0006371	267.8	-0.6328	-0.0006328	267.8	-0.6287	-0.0006287		267.8	-0.7095	-0.0007095	267.8	-0.6406	-0.0006406	267.8	-0.6377	-0.0006377	267.8	-0.6298
	268.3	-0.7095	-0.0007095	268.3	-0.6482	-0.0006482	268.3	-0.6392	-0.0006392	268.3	-0.615	-0.000615	268.3	-0.6116	-0.0006116	268.3	-0.5958	-0.0005958		268.3	-0.7095	-0.0007095	268.3	-0.6577	-0.0006577	268.3	-0.6437	-0.0006437	268.3	-0.6371	-0.0006371	268.3	-0.6328	-0.0006328	268.3	-0.6286	-0.0006286		268.3	-0.7095	-0.0007095	268.3	-0.6406	-0.0006406	268.3	-0.6377	-0.0006377	268.3	-0.6297
	268.8	-0.7095	-0.0007095	268.8	-0.6482	-0.0006482	268.8	-0.6392	-0.0006392	268.8	-0.615	-0.000615	268.8	-0.6116	-0.0006116	268.8	-0.5959	-0.0005959		268.8	-0.7095	-0.0007095	268.8	-0.6577	-0.0006577	268.8	-0.6437	-0.0006437	268.8	-0.6371	-0.0006371	268.8	-0.6328	-0.0006328	268.8	-0.6286	-0.0006286		268.8	-0.7095	-0.0007095	268.8	-0.6407	-0.0006407	268.8	-0.6377	-0.0006377	268.8	-0.6297
	269.3	-0.7095	-0.0007095	269.3	-0.6482	-0.0006482	269.3	-0.6392	-0.0006392	269.3	-0.615	-0.000615	269.3	-0.6116	-0.0006116	269.3	-0.5959	-0.0005959		269.3	-0.7095	-0.0007095	269.3	-0.6576	-0.0006576	269.3	-0.6437	-0.0006437	269.3	-0.6371	-0.0006371	269.3	-0.6328	-0.0006328	269.3	-0.6286	-0.0006286		269.3	-0.7095	-0.0007095	269.3	-0.6407	-0.0006407	269.3	-0.6377	-0.0006377	269.3	-0.6297
	269.8	-0.7095	-0.0007095	269.8	-0.6482	-0.0006482	269.8	-0.6392	-0.0006392	269.8	-0.615	-0.000615	269.8	-0.6117	-0.0006117	269.8	-0.5959	-0.0005959		269.8	-0.7095	-0.0007095	269.8	-0.6576	-0.0006576	269.8	-0.6437	-0.0006437	269.8	-0.6371	-0.0006371	269.8	-0.6328	-0.0006328	269.8	-0.6286	-0.0006286		269.8	-0.7095	-0.0007095	269.8	-0.6407	-0.0006407	269.8	-0.6377	-0.0006377	269.8	-0.6297
	270.3	-0.7095	-0.0007095	270.3	-0.6482	-0.0006482	270.3	-0.6392	-0.0006392	270.3	-0.615	-0.000615	270.3	-0.6117	-0.0006117	270.3	-0.596	-0.000596		270.3	-0.7095	-0.0007095	270.3	-0.6576	-0.0006576	270.3	-0.6437	-0.0006437	270.3	-0.6371	-0.0006371	270.3	-0.6328	-0.0006328	270.3	-0.6286	-0.0006286		270.3	-0.7095	-0.0007095	270.3	-0.6408	-0.0006408	270.3	-0.6377	-0.0006377	270.3	-0.6296
	270.8	-0.7095	-0.0007095	270.8	-0.6482	-0.0006482	270.8	-0.6392	-0.0006392	270.8	-0.615	-0.000615	270.8	-0.6117	-0.0006117	270.8	-0.596	-0.000596		270.8	-0.7095	-0.0007095	270.8	-0.6576	-0.0006576	270.8	-0.6437	-0.0006437	270.8	-0.6371	-0.0006371	270.8	-0.6328	-0.0006328	270.8	-0.6286	-0.0006286		270.8	-0.7095	-0.0007095	270.8	-0.6408	-0.0006408	270.8	-0.6377	-0.0006377	270.8	-0.6296
	271.3	-0.7095	-0.0007095	271.3	-0.6482	-0.0006482	271.3	-0.6392	-0.0006392	271.3	-0.615	-0.000615	271.3	-0.6118	-0.0006118	271.3	-0.596	-0.000596		271.3	-0.7095	-0.0007095	271.3	-0.6576	-0.0006576	271.3	-0.6437	-0.0006437	271.3	-0.6371	-0.0006371	271.3	-0.6328	-0.0006328	271.3	-0.6286	-0.0006286		271.3	-0.7095	-0.0007095	271.3	-0.6408	-0.0006408	271.3	-0.6377	-0.0006377	271.3	-0.6296
	271.8	-0.7095	-0.0007095	271.8	-0.6482	-0.0006482	271.8	-0.6392	-0.0006392	271.8	-0.615	-0.000615	271.8	-0.6118	-0.0006118	271.8	-0.596	-0.000596		271.8	-0.7095	-0.0007095	271.8	-0.6576	-0.0006576	271.8	-0.6437	-0.0006437	271.8	-0.6371	-0.0006371	271.8	-0.6328	-0.0006328	271.8	-0.6286	-0.0006286		271.8	-0.7095	-0.0007095	271.8	-0.6409	-0.0006409	271.8	-0.6377	-0.0006377	271.8	-0.6296
	272.3	-0.7095	-0.0007095	272.3	-0.6482	-0.0006482	272.3	-0.6392	-0.0006392	272.3	-0.6151	-0.0006151	272.3	-0.6118	-0.0006118	272.3	-0.5961	-0.0005961		272.3	-0.7095	-0.0007095	272.3	-0.6576	-0.0006576	272.3	-0.6437	-0.0006437	272.3	-0.6371	-0.0006371	272.3	-0.6328	-0.0006328	272.3	-0.6286	-0.0006286		272.3	-0.7095	-0.0007095	272.3	-0.6409	-0.0006409	272.3	-0.6377	-0.0006377	272.3	-0.6296
	272.9	-0.7095	-0.0007095	272.9	-0.6482	-0.0006482	272.9	-0.6392	-0.0006392	272.9	-0.6151	-0.0006151	272.9	-0.6118	-0.0006118	272.9	-0.5961	-0.0005961		272.9	-0.7095	-0.0007095	272.9	-0.6576	-0.0006576	272.9	-0.6437	-0.0006437	272.9	-0.6371	-0.0006371	272.9	-0.6328	-0.0006328	272.9	-0.6286	-0.0006286		272.9	-0.7095	-0.0007095	272.9	-0.641	-0.000641	272.9	-0.6377	-0.0006377	272.9	-0.6296
	273.4	-0.7095	-0.0007095	273.4	-0.6482	-0.0006482	273.4	-0.6392	-0.0006392	273.4	-0.6151	-0.0006151	273.4	-0.6119	-0.0006119	273.4	-0.5961	-0.0005961		273.4	-0.7095	-0.0007095	273.4	-0.6576	-0.0006576	273.4	-0.6437	-0.0006437	273.4	-0.6371	-0.0006371	273.4	-0.6328	-0.0006328	273.4	-0.6286	-0.0006286		273.4	-0.7095	-0.0007095	273.4	-0.641	-0.000641	273.4	-0.6377	-0.0006377	273.4	-0.6295
	273.9	-0.7095	-0.0007095	273.9	-0.6482	-0.0006482	273.9	-0.6392	-0.0006392	273.9	-0.6151	-0.0006151	273.9	-0.6119	-0.0006119	273.9	-0.5961	-0.0005961		273.9	-0.7095	-0.0007095	273.9	-0.6575	-0.0006575	273.9	-0.6437	-0.0006437	273.9	-0.6371	-0.0006371	273.9	-0.6328	-0.0006328	273.9	-0.6286	-0.0006286		273.9	-0.7095	-0.0007095	273.9	-0.641	-0.000641	273.9	-0.6377	-0.0006377	273.9	-0.6295
	274.4	-0.7094	-0.0007094	274.4	-0.6482	-0.0006482	274.4	-0.6392	-0.0006392	274.4	-0.6151	-0.0006151	274.4	-0.6119	-0.0006119	274.4	-0.5961	-0.0005961		274.4	-0.7094	-0.0007094	274.4	-0.6575	-0.0006575	274.4	-0.6438	-0.0006438	274.4	-0.6371	-0.0006371	274.4	-0.6328	-0.0006328	274.4	-0.6286	-0.0006286		274.4	-0.7094	-0.0007094	274.4	-0.6411	-0.0006411	274.4	-0.6377	-0.0006377	274.4	-0.6295
	274.9	-0.7094	-0.0007094	274.9	-0.6482	-0.0006482	274.9	-0.6393	-0.0006393	274.9	-0.6151	-0.0006151	274.9	-0.6119	-0.0006119	274.9	-0.5962	-0.0005962		274.9	-0.7094	-0.0007094	274.9	-0.6575	-0.0006575	274.9	-0.6438	-0.0006438	274.9	-0.6371	-0.0006371	274.9	-0.6328	-0.0006328	274.9	-0.6286	-0.0006286		274.9	-0.7094	-0.0007094	274.9	-0.6411	-0.0006411	274.9	-0.6377	-0.0006377	274.9	-0.6295
	275.4	-0.7094	-0.0007094	275.4	-0.6482	-0.0006482	275.4	-0.6393	-0.0006393	275.4	-0.6151	-0.0006151	275.4	-0.612	-0.000612	275.4	-0.5962	-0.0005962		275.4	-0.7094	-0.0007094	275.4	-0.6575	-0.0006575	275.4	-0.6438	-0.0006438	275.4	-0.6371	-0.0006371	275.4	-0.6328	-0.0006328	275.4	-0.6286	-0.0006286		275.4	-0.7094	-0.0007094	275.4	-0.6412	-0.0006412	275.4	-0.6377	-0.0006377	275.4	-0.6295
	275.9	-0.7093	-0.0007093	275.9	-0.6483	-0.0006483	275.9	-0.6393	-0.0006393	275.9	-0.6151	-0.0006151	275.9	-0.612	-0.000612	275.9	-0.5962	-0.0005962		275.9	-0.7093	-0.0007093	275.9	-0.6575	-0.0006575	275.9	-0.6438	-0.0006438	275.9	-0.6371	-0.0006371	275.9	-0.6328	-0.0006328	275.9	-0.6286	-0.0006286		275.9	-0.7093	-0.0007093	275.9	-0.6412	-0.0006412	275.9	-0.6377	-0.0006377	275.9	-0.6295
	276.4	-0.7093	-0.0007093	276.4	-0.6483	-0.0006483	276.4	-0.6393	-0.0006393	276.4	-0.6151	-0.0006151	276.4	-0.612	-0.000612	276.4	-0.5962	-0.0005962		276.4	-0.7093	-0.0007093	276.4	-0.6575	-0.0006575	276.4	-0.6438	-0.0006438	276.4	-0.6371	-0.0006371	276.4	-0.6328	-0.0006328	276.4	-0.6286	-0.0006286		276.4	-0.7093	-0.0007093	276.4	-0.6412	-0.0006412	276.4	-0.6377	-0.0006377	276.4	-0.6295
	276.9	-0.7093	-0.0007093	276.9	-0.6483	-0.0006483	276.9	-0.6393	-0.0006393	276.9	-0.6151	-0.0006151	276.9	-0.6121	-0.0006121	276.9	-0.5963	-0.0005963		276.9	-0.7093	-0.0007093	276.9	-0.6575	-0.0006575	276.9	-0.6438	-0.0006438	276.9	-0.6371	-0.0006371	276.9	-0.6328	-0.0006328	276.9	-0.6286	-0.0006286		276.9	-0.7093	-0.0007093	276.9	-0.6412	-0.0006412	276.9	-0.6377	-0.0006377	276.9	-0.6295
	277.4	-0.7093	-0.0007093	277.4	-0.6483	-0.0006483	277.4	-0.6393	-0.0006393	277.4	-0.615	-0.000615	277.4	-0.6121	-0.0006121	277.4	-0.5963	-0.0005963		277.4	-0.7093	-0.0007093	277.4	-0.6575	-0.0006575	277.4	-0.6438	-0.0006438	277.4	-0.6371	-0.0006371	277.4	-0.6328	-0.0006328	277.4	-0.6286	-0.0006286		277.4	-0.7093	-0.0007093	277.4	-0.6413	-0.0006413	277.4	-0.6377	-0.0006377	277.4	-0.6295
	278	-0.7093	-0.0007093	278	-0.6483	-0.0006483	278	-0.6393	-0.0006393	278	-0.615	-0.000615	278	-0.6121	-0.0006121	278	-0.5963	-0.0005963		278	-0.7093	-0.0007093	278	-0.6575	-0.0006575	278	-0.6438	-0.0006438	278	-0.6371	-0.0006371	278	-0.6327	-0.0006327	278	-0.6286	-0.0006286		278	-0.7093	-0.0007093	278	-0.6413	-0.0006413	278	-0.6377	-0.0006377	278	-0.6295
	278.5	-0.7093	-0.0007093	278.5	-0.6483	-0.0006483	278.5	-0.6393	-0.0006393	278.5	-0.615	-0.000615	278.5	-0.6121	-0.0006121	278.5	-0.5963	-0.0005963		278.5	-0.7093	-0.0007093	278.5	-0.6575	-0.0006575	278.5	-0.6438	-0.0006438	278.5	-0.6371	-0.0006371	278.5	-0.6327	-0.0006327	278.5	-0.6286	-0.0006286		278.5	-0.7093	-0.0007093	278.5	-0.6414	-0.0006414	278.5	-0.6377	-0.0006377	278.5	-0.6294
	279	-0.7093	-0.0007093	279	-0.6483	-0.0006483	279	-0.6393	-0.0006393	279	-0.615	-0.000615	279	-0.6122	-0.0006122	279	-0.5964	-0.0005964		279	-0.7093	-0.0007093	279	-0.6576	-0.0006576	279	-0.6438	-0.0006438	279	-0.6371	-0.0006371	279	-0.6327	-0.0006327	279	-0.6286	-0.0006286		279	-0.7093	-0.0007093	279	-0.6414	-0.0006414	279	-0.6377	-0.0006377	279	-0.6294
	279.5	-0.7093	-0.0007093	279.5	-0.6483	-0.0006483	279.5	-0.6393	-0.0006393	279.5	-0.615	-0.000615	279.5	-0.6122	-0.0006122	279.5	-0.5964	-0.0005964		279.5	-0.7093	-0.0007093	279.5	-0.6576	-0.0006576	279.5	-0.6438	-0.0006438	279.5	-0.6371	-0.0006371	279.5	-0.6327	-0.0006327	279.5	-0.6286	-0.0006286		279.5	-0.7093	-0.0007093	279.5	-0.6414	-0.0006414	279.5	-0.6377	-0.0006377	279.5	-0.6294
	280	-0.7093	-0.0007093	280	-0.6483	-0.0006483	280	-0.6393	-0.0006393	280	-0.615	-0.000615	280	-0.6122	-0.0006122	280	-0.5964	-0.0005964		280	-0.7093	-0.0007093	280	-0.6575	-0.0006575	280	-0.6438	-0.0006438	280	-0.6371	-0.0006371	280	-0.6327	-0.0006327	280	-0.6286	-0.0006286		280	-0.7093	-0.0007093	280	-0.6415	-0.0006415	280	-0.6377	-0.0006377	280	-0.6294
	280.5	-0.7093	-0.0007093	280.5	-0.6483	-0.0006483	280.5	-0.6393	-0.0006393	280.5	-0.615	-0.000615	280.5	-0.6123	-0.0006123	280.5	-0.5964	-0.0005964		280.5	-0.7093	-0.0007093	280.5	-0.6575	-0.0006575	280.5	-0.6438	-0.0006438	280.5	-0.6371	-0.0006371	280.5	-0.6327	-0.0006327	280.5	-0.6286	-0.0006286		280.5	-0.7093	-0.0007093	280.5	-0.6415	-0.0006415	280.5	-0.6377	-0.0006377	280.5	-0.6294
	281	-0.7093	-0.0007093	281	-0.6483	-0.0006483	281	-0.6393	-0.0006393	281	-0.615	-0.000615	281	-0.6123	-0.0006123	281	-0.5965	-0.0005965		281	-0.7093	-0.0007093	281	-0.6575	-0.0006575	281	-0.6438	-0.0006438	281	-0.6371	-0.0006371	281	-0.6327	-0.0006327	281	-0.6286	-0.0006286		281	-0.7093	-0.0007093	281	-0.6415	-0.0006415	281	-0.6377	-0.0006377	281	-0.6294
	281.5	-0.7092	-0.0007092	281.5	-0.6483	-0.0006483	281.5	-0.6393	-0.0006393	281.5	-0.615	-0.000615	281.5	-0.6123	-0.0006123	281.5	-0.5965	-0.0005965		281.5	-0.7092	-0.0007092	281.5	-0.6575	-0.0006575	281.5	-0.6438	-0.0006438	281.5	-0.6371	-0.0006371	281.5	-0.6327	-0.0006327	281.5	-0.6286	-0.0006286		281.5	-0.7092	-0.0007092	281.5	-0.6416	-0.0006416	281.5	-0.6377	-0.0006377	281.5	-0.6294
	282	-0.7092	-0.0007092	282	-0.6483	-0.0006483	282	-0.6393	-0.0006393	282	-0.615	-0.000615	282	-0.6124	-0.0006124	282	-0.5965	-0.0005965		282	-0.7092	-0.0007092	282	-0.6575	-0.0006575	282	-0.6438	-0.0006438	282	-0.6371	-0.0006371	282	-0.6327	-0.0006327	282	-0.6286	-0.0006286		282	-0.7092	-0.0007092	282	-0.6416	-0.0006416	282	-0.6377	-0.0006377	282	-0.6294
	282.5	-0.7092	-0.0007092	282.5	-0.6483	-0.0006483	282.5	-0.6393	-0.0006393	282.5	-0.615	-0.000615	282.5	-0.6124	-0.0006124	282.5	-0.5965	-0.0005965		282.5	-0.7092	-0.0007092	282.5	-0.6575	-0.0006575	282.5	-0.6438	-0.0006438	282.5	-0.6371	-0.0006371	282.5	-0.6327	-0.0006327	282.5	-0.6286	-0.0006286		282.5	-0.7092	-0.0007092	282.5	-0.6417	-0.0006417	282.5	-0.6377	-0.0006377	282.5	-0.6293
	283	-0.7092	-0.0007092	283	-0.6483	-0.0006483	283	-0.6394	-0.0006394	283	-0.615	-0.000615	283	-0.6124	-0.0006124	283	-0.5965	-0.0005965		283	-0.7092	-0.0007092	283	-0.6575	-0.0006575	283	-0.6438	-0.0006438	283	-0.637	-0.000637	283	-0.6327	-0.0006327	283	-0.6286	-0.0006286		283	-0.7092	-0.0007092	283	-0.6417	-0.0006417	283	-0.6377	-0.0006377	283	-0.6293
	283.6	-0.7091	-0.0007091	283.6	-0.6483	-0.0006483	283.6	-0.6394	-0.0006394	283.6	-0.6151	-0.0006151	283.6	-0.6125	-0.0006125	283.6	-0.5966	-0.0005966		283.6	-0.7091	-0.0007091	283.6	-0.6575	-0.0006575	283.6	-0.6438	-0.0006438	283.6	-0.637	-0.000637	283.6	-0.6327	-0.0006327	283.6	-0.6286	-0.0006286		283.6	-0.7091	-0.0007091	283.6	-0.6418	-0.0006418	283.6	-0.6377	-0.0006377	283.6	-0.6293
	284.1	-0.7091	-0.0007091	284.1	-0.6483	-0.0006483	284.1	-0.6394	-0.0006394	284.1	-0.6151	-0.0006151	284.1	-0.6125	-0.0006125	284.1	-0.5966	-0.0005966		284.1	-0.7091	-0.0007091	284.1	-0.6575	-0.0006575	284.1	-0.6438	-0.0006438	284.1	-0.637	-0.000637	284.1	-0.6327	-0.0006327	284.1	-0.6286	-0.0006286		284.1	-0.7091	-0.0007091	284.1	-0.6418	-0.0006418	284.1	-0.6377	-0.0006377	284.1	-0.6293
	284.6	-0.7091	-0.0007091	284.6	-0.6483	-0.0006483	284.6	-0.6394	-0.0006394	284.6	-0.6151	-0.0006151	284.6	-0.6125	-0.0006125	284.6	-0.5966	-0.0005966		284.6	-0.7091	-0.0007091	284.6	-0.6574	-0.0006574	284.6	-0.6438	-0.0006438	284.6	-0.637	-0.000637	284.6	-0.6327	-0.0006327	284.6	-0.6286	-0.0006286		284.6	-0.7091	-0.0007091	284.6	-0.6418	-0.0006418	284.6	-0.6377	-0.0006377	284.6	-0.6292
	285.1	-0.709	-0.000709	285.1	-0.6483	-0.0006483	285.1	-0.6394	-0.0006394	285.1	-0.6151	-0.0006151	285.1	-0.6125	-0.0006125	285.1	-0.5966	-0.0005966		285.1	-0.709	-0.000709	285.1	-0.6574	-0.0006574	285.1	-0.6439	-0.0006439	285.1	-0.637	-0.000637	285.1	-0.6327	-0.0006327	285.1	-0.6286	-0.0006286		285.1	-0.709	-0.000709	285.1	-0.6419	-0.0006419	285.1	-0.6377	-0.0006377	285.1	-0.6292
	285.6	-0.709	-0.000709	285.6	-0.6483	-0.0006483	285.6	-0.6394	-0.0006394	285.6	-0.6151	-0.0006151	285.6	-0.6126	-0.0006126	285.6	-0.5967	-0.0005967		285.6	-0.709	-0.000709	285.6	-0.6574	-0.0006574	285.6	-0.6439	-0.0006439	285.6	-0.637	-0.000637	285.6	-0.6327	-0.0006327	285.6	-0.6286	-0.0006286		285.6	-0.709	-0.000709	285.6	-0.6419	-0.0006419	285.6	-0.6377	-0.0006377	285.6	-0.6292
	286.1	-0.7089	-0.0007089	286.1	-0.6483	-0.0006483	286.1	-0.6394	-0.0006394	286.1	-0.6151	-0.0006151	286.1	-0.6126	-0.0006126	286.1	-0.5967	-0.0005967		286.1	-0.7089	-0.0007089	286.1	-0.6574	-0.0006574	286.1	-0.6439	-0.0006439	286.1	-0.637	-0.000637	286.1	-0.6327	-0.0006327	286.1	-0.6286	-0.0006286		286.1	-0.7089	-0.0007089	286.1	-0.6419	-0.0006419	286.1	-0.6377	-0.0006377	286.1	-0.6292
	286.6	-0.7089	-0.0007089	286.6	-0.6483	-0.0006483	286.6	-0.6394	-0.0006394	286.6	-0.6151	-0.0006151	286.6	-0.6126	-0.0006126	286.6	-0.5967	-0.0005967		286.6	-0.7089	-0.0007089	286.6	-0.6574	-0.0006574	286.6	-0.6439	-0.0006439	286.6	-0.637	-0.000637	286.6	-0.6327	-0.0006327	286.6	-0.6286	-0.0006286		286.6	-0.7089	-0.0007089	286.6	-0.6419	-0.0006419	286.6	-0.6377	-0.0006377	286.6	-0.6292
	287.1	-0.7089	-0.0007089	287.1	-0.6483	-0.0006483	287.1	-0.6394	-0.0006394	287.1	-0.6151	-0.0006151	287.1	-0.6126	-0.0006126	287.1	-0.5967	-0.0005967		287.1	-0.7089	-0.0007089	287.1	-0.6574	-0.0006574	287.1	-0.6439	-0.0006439	287.1	-0.637	-0.000637	287.1	-0.6327	-0.0006327	287.1	-0.6286	-0.0006286		287.1	-0.7089	-0.0007089	287.1	-0.6419	-0.0006419	287.1	-0.6377	-0.0006377	287.1	-0.6292
	287.6	-0.7089	-0.0007089	287.6	-0.6483	-0.0006483	287.6	-0.6394	-0.0006394	287.6	-0.6152	-0.0006152	287.6	-0.6127	-0.0006127	287.6	-0.5967	-0.0005967		287.6	-0.7089	-0.0007089	287.6	-0.6574	-0.0006574	287.6	-0.6439	-0.0006439	287.6	-0.637	-0.000637	287.6	-0.6327	-0.0006327	287.6	-0.6286	-0.0006286		287.6	-0.7089	-0.0007089	287.6	-0.6419	-0.0006419	287.6	-0.6377	-0.0006377	287.6	-0.6291
	288.1	-0.7089	-0.0007089	288.1	-0.6483	-0.0006483	288.1	-0.6394	-0.0006394	288.1	-0.6152	-0.0006152	288.1	-0.6127	-0.0006127	288.1	-0.5968	-0.0005968		288.1	-0.7089	-0.0007089	288.1	-0.6574	-0.0006574	288.1	-0.6439	-0.0006439	288.1	-0.637	-0.000637	288.1	-0.6327	-0.0006327	288.1	-0.6286	-0.0006286		288.1	-0.7089	-0.0007089	288.1	-0.642	-0.000642	288.1	-0.6377	-0.0006377	288.1	-0.6291
	288.7	-0.7089	-0.0007089	288.7	-0.6483	-0.0006483	288.7	-0.6394	-0.0006394	288.7	-0.6152	-0.0006152	288.7	-0.6127	-0.0006127	288.7	-0.5968	-0.0005968		288.7	-0.7089	-0.0007089	288.7	-0.6574	-0.0006574	288.7	-0.6439	-0.0006439	288.7	-0.637	-0.000637	288.7	-0.6327	-0.0006327	288.7	-0.6286	-0.0006286		288.7	-0.7089	-0.0007089	288.7	-0.6421	-0.0006421	288.7	-0.6376	-0.0006376	288.7	-0.6291
	289.2	-0.7089	-0.0007089	289.2	-0.6484	-0.0006484	289.2	-0.6394	-0.0006394	289.2	-0.6152	-0.0006152	289.2	-0.6128	-0.0006128	289.2	-0.5968	-0.0005968		289.2	-0.7089	-0.0007089	289.2	-0.6574	-0.0006574	289.2	-0.6439	-0.0006439	289.2	-0.637	-0.000637	289.2	-0.6327	-0.0006327	289.2	-0.6286	-0.0006286		289.2	-0.7089	-0.0007089	289.2	-0.6421	-0.0006421	289.2	-0.6376	-0.0006376	289.2	-0.6291
	289.7	-0.7089	-0.0007089	289.7	-0.6484	-0.0006484	289.7	-0.6394	-0.0006394	289.7	-0.6152	-0.0006152	289.7	-0.6128	-0.0006128	289.7	-0.5968	-0.0005968		289.7	-0.7089	-0.0007089	289.7	-0.6573	-0.0006573	289.7	-0.6439	-0.0006439	289.7	-0.637	-0.000637	289.7	-0.6327	-0.0006327	289.7	-0.6286	-0.0006286		289.7	-0.7089	-0.0007089	289.7	-0.6422	-0.0006422	289.7	-0.6376	-0.0006376	289.7	-0.6291
	290.2	-0.7088	-0.0007088	290.2	-0.6484	-0.0006484	290.2	-0.6394	-0.0006394	290.2	-0.6152	-0.0006152	290.2	-0.6128	-0.0006128	290.2	-0.5969	-0.0005969		290.2	-0.7088	-0.0007088	290.2	-0.6573	-0.0006573	290.2	-0.6439	-0.0006439	290.2	-0.637	-0.000637	290.2	-0.6327	-0.0006327	290.2	-0.6286	-0.0006286		290.2	-0.7088	-0.0007088	290.2	-0.6422	-0.0006422	290.2	-0.6376	-0.0006376	290.2	-0.6291
	290.7	-0.7088	-0.0007088	290.7	-0.6484	-0.0006484	290.7	-0.6394	-0.0006394	290.7	-0.6152	-0.0006152	290.7	-0.6128	-0.0006128	290.7	-0.5969	-0.0005969		290.7	-0.7088	-0.0007088	290.7	-0.6573	-0.0006573	290.7	-0.6439	-0.0006439	290.7	-0.637	-0.000637	290.7	-0.6327	-0.0006327	290.7	-0.6286	-0.0006286		290.7	-0.7088	-0.0007088	290.7	-0.6422	-0.0006422	290.7	-0.6376	-0.0006376	290.7	-0.629
	291.2	-0.7088	-0.0007088	291.2	-0.6484	-0.0006484	291.2	-0.6395	-0.0006395	291.2	-0.6153	-0.0006153	291.2	-0.6129	-0.0006129	291.2	-0.5969	-0.0005969		291.2	-0.7088	-0.0007088	291.2	-0.6573	-0.0006573	291.2	-0.644	-0.000644	291.2	-0.637	-0.000637	291.2	-0.6327	-0.0006327	291.2	-0.6286	-0.0006286		291.2	-0.7088	-0.0007088	291.2	-0.6423	-0.0006423	291.2	-0.6377	-0.0006377	291.2	-0.629
	291.7	-0.7087	-0.0007087	291.7	-0.6484	-0.0006484	291.7	-0.6395	-0.0006395	291.7	-0.6153	-0.0006153	291.7	-0.6129	-0.0006129	291.7	-0.5969	-0.0005969		291.7	-0.7087	-0.0007087	291.7	-0.6573	-0.0006573	291.7	-0.644	-0.000644	291.7	-0.637	-0.000637	291.7	-0.6327	-0.0006327	291.7	-0.6286	-0.0006286		291.7	-0.7087	-0.0007087	291.7	-0.6423	-0.0006423	291.7	-0.6377	-0.0006377	291.7	-0.629
	292.2	-0.7087	-0.0007087	292.2	-0.6484	-0.0006484	292.2	-0.6395	-0.0006395	292.2	-0.6153	-0.0006153	292.2	-0.6129	-0.0006129	292.2	-0.5969	-0.0005969		292.2	-0.7087	-0.0007087	292.2	-0.6573	-0.0006573	292.2	-0.644	-0.000644	292.2	-0.637	-0.000637	292.2	-0.6327	-0.0006327	292.2	-0.6286	-0.0006286		292.2	-0.7087	-0.0007087	292.2	-0.6423	-0.0006423	292.2	-0.6377	-0.0006377	292.2	-0.629
	292.7	-0.7087	-0.0007087	292.7	-0.6484	-0.0006484	292.7	-0.6395	-0.0006395	292.7	-0.6153	-0.0006153	292.7	-0.613	-0.000613	292.7	-0.597	-0.000597		292.7	-0.7087	-0.0007087	292.7	-0.6573	-0.0006573	292.7	-0.644	-0.000644	292.7	-0.637	-0.000637	292.7	-0.6327	-0.0006327	292.7	-0.6286	-0.0006286		292.7	-0.7087	-0.0007087	292.7	-0.6424	-0.0006424	292.7	-0.6377	-0.0006377	292.7	-0.629
	293.3	-0.7087	-0.0007087	293.3	-0.6484	-0.0006484	293.3	-0.6395	-0.0006395	293.3	-0.6153	-0.0006153	293.3	-0.613	-0.000613	293.3	-0.597	-0.000597		293.3	-0.7087	-0.0007087	293.3	-0.6573	-0.0006573	293.3	-0.644	-0.000644	293.3	-0.637	-0.000637	293.3	-0.6327	-0.0006327	293.3	-0.6286	-0.0006286		293.3	-0.7087	-0.0007087	293.3	-0.6424	-0.0006424	293.3	-0.6377	-0.0006377	293.3	-0.629
	293.8	-0.7088	-0.0007088	293.8	-0.6484	-0.0006484	293.8	-0.6395	-0.0006395	293.8	-0.6154	-0.0006154	293.8	-0.613	-0.000613	293.8	-0.597	-0.000597		293.8	-0.7088	-0.0007088	293.8	-0.6573	-0.0006573	293.8	-0.644	-0.000644	293.8	-0.637	-0.000637	293.8	-0.6326	-0.0006326	293.8	-0.6286	-0.0006286		293.8	-0.7088	-0.0007088	293.8	-0.6424	-0.0006424	293.8	-0.6377	-0.0006377	293.8	-0.6289
	294.3	-0.7088	-0.0007088	294.3	-0.6484	-0.0006484	294.3	-0.6395	-0.0006395	294.3	-0.6154	-0.0006154	294.3	-0.613	-0.000613	294.3	-0.597	-0.000597		294.3	-0.7088	-0.0007088	294.3	-0.6573	-0.0006573	294.3	-0.644	-0.000644	294.3	-0.637	-0.000637	294.3	-0.6326	-0.0006326	294.3	-0.6286	-0.0006286		294.3	-0.7088	-0.0007088	294.3	-0.6425	-0.0006425	294.3	-0.6377	-0.0006377	294.3	-0.6289
	294.8	-0.7087	-0.0007087	294.8	-0.6484	-0.0006484	294.8	-0.6395	-0.0006395	294.8	-0.6154	-0.0006154	294.8	-0.6131	-0.0006131	294.8	-0.5971	-0.0005971		294.8	-0.7087	-0.0007087	294.8	-0.6573	-0.0006573	294.8	-0.644	-0.000644	294.8	-0.637	-0.000637	294.8	-0.6326	-0.0006326	294.8	-0.6286	-0.0006286		294.8	-0.7087	-0.0007087	294.8	-0.6425	-0.0006425	294.8	-0.6377	-0.0006377	294.8	-0.6289
	295.3	-0.7087	-0.0007087	295.3	-0.6484	-0.0006484	295.3	-0.6395	-0.0006395	295.3	-0.6154	-0.0006154	295.3	-0.6131	-0.0006131	295.3	-0.5971	-0.0005971		295.3	-0.7087	-0.0007087	295.3	-0.6573	-0.0006573	295.3	-0.644	-0.000644	295.3	-0.637	-0.000637	295.3	-0.6326	-0.0006326	295.3	-0.6286	-0.0006286		295.3	-0.7087	-0.0007087	295.3	-0.6426	-0.0006426	295.3	-0.6377	-0.0006377	295.3	-0.6289
	295.8	-0.7087	-0.0007087	295.8	-0.6484	-0.0006484	295.8	-0.6395	-0.0006395	295.8	-0.6154	-0.0006154	295.8	-0.6131	-0.0006131	295.8	-0.5971	-0.0005971		295.8	-0.7087	-0.0007087	295.8	-0.6573	-0.0006573	295.8	-0.644	-0.000644	295.8	-0.637	-0.000637	295.8	-0.6327	-0.0006327	295.8	-0.6286	-0.0006286		295.8	-0.7087	-0.0007087	295.8	-0.6426	-0.0006426	295.8	-0.6377	-0.0006377	295.8	-0.6289
	296.3	-0.7086	-0.0007086	296.3	-0.6484	-0.0006484	296.3	-0.6395	-0.0006395	296.3	-0.6154	-0.0006154	296.3	-0.6131	-0.0006131	296.3	-0.5971	-0.0005971		296.3	-0.7086	-0.0007086	296.3	-0.6573	-0.0006573	296.3	-0.6441	-0.0006441	296.3	-0.637	-0.000637	296.3	-0.6327	-0.0006327	296.3	-0.6286	-0.0006286		296.3	-0.7086	-0.0007086	296.3	-0.6426	-0.0006426	296.3	-0.6377	-0.0006377	296.3	-0.6289
	296.8	-0.7086	-0.0007086	296.8	-0.6484	-0.0006484	296.8	-0.6395	-0.0006395	296.8	-0.6153	-0.0006153	296.8	-0.6132	-0.0006132	296.8	-0.5971	-0.0005971		296.8	-0.7086	-0.0007086	296.8	-0.6573	-0.0006573	296.8	-0.6441	-0.0006441	296.8	-0.637	-0.000637	296.8	-0.6327	-0.0006327	296.8	-0.6286	-0.0006286		296.8	-0.7086	-0.0007086	296.8	-0.6427	-0.0006427	296.8	-0.6377	-0.0006377	296.8	-0.6289
	297.3	-0.7086	-0.0007086	297.3	-0.6484	-0.0006484	297.3	-0.6395	-0.0006395	297.3	-0.6153	-0.0006153	297.3	-0.6132	-0.0006132	297.3	-0.5972	-0.0005972		297.3	-0.7086	-0.0007086	297.3	-0.6573	-0.0006573	297.3	-0.6441	-0.0006441	297.3	-0.637	-0.000637	297.3	-0.6327	-0.0006327	297.3	-0.6286	-0.0006286		297.3	-0.7086	-0.0007086	297.3	-0.6427	-0.0006427	297.3	-0.6377	-0.0006377	297.3	-0.6288
	297.8	-0.7085	-0.0007085	297.8	-0.6484	-0.0006484	297.8	-0.6395	-0.0006395	297.8	-0.6153	-0.0006153	297.8	-0.6132	-0.0006132	297.8	-0.5972	-0.0005972		297.8	-0.7085	-0.0007085	297.8	-0.6572	-0.0006572	297.8	-0.6441	-0.0006441	297.8	-0.637	-0.000637	297.8	-0.6327	-0.0006327	297.8	-0.6286	-0.0006286		297.8	-0.7085	-0.0007085	297.8	-0.6428	-0.0006428	297.8	-0.6377	-0.0006377	297.8	-0.6288
	298.4	-0.7085	-0.0007085	298.4	-0.6484	-0.0006484	298.4	-0.6395	-0.0006395	298.4	-0.6154	-0.0006154	298.4	-0.6133	-0.0006133	298.4	-0.5972	-0.0005972		298.4	-0.7085	-0.0007085	298.4	-0.6572	-0.0006572	298.4	-0.6441	-0.0006441	298.4	-0.637	-0.000637	298.4	-0.6327	-0.0006327	298.4	-0.6286	-0.0006286		298.4	-0.7085	-0.0007085	298.4	-0.6428	-0.0006428	298.4	-0.6377	-0.0006377	298.4	-0.6288
	298.9	-0.7085	-0.0007085	298.9	-0.6484	-0.0006484	298.9	-0.6395	-0.0006395	298.9	-0.6154	-0.0006154	298.9	-0.6133	-0.0006133	298.9	-0.5972	-0.0005972		298.9	-0.7085	-0.0007085	298.9	-0.6572	-0.0006572	298.9	-0.6441	-0.0006441	298.9	-0.637	-0.000637	298.9	-0.6327	-0.0006327	298.9	-0.6286	-0.0006286		298.9	-0.7085	-0.0007085	298.9	-0.6428	-0.0006428	298.9	-0.6377	-0.0006377	298.9	-0.6288
	299.4	-0.7084	-0.0007084	299.4	-0.6484	-0.0006484	299.4	-0.6395	-0.0006395	299.4	-0.6154	-0.0006154	299.4	-0.6133	-0.0006133	299.4	-0.5972	-0.0005972		299.4	-0.7084	-0.0007084	299.4	-0.6572	-0.0006572	299.4	-0.6441	-0.0006441	299.4	-0.637	-0.000637	299.4	-0.6327	-0.0006327	299.4	-0.6286	-0.0006286		299.4	-0.7084	-0.0007084	299.4	-0.6429	-0.0006429	299.4	-0.6377	-0.0006377	299.4	-0.6288
	299.9	-0.7084	-0.0007084	299.9	-0.6484	-0.0006484	299.9	-0.6395	-0.0006395	299.9	-0.6155	-0.0006155	299.9	-0.6133	-0.0006133	299.9	-0.5973	-0.0005973		299.9	-0.7084	-0.0007084	299.9	-0.6572	-0.0006572	299.9	-0.6441	-0.0006441	299.9	-0.637	-0.000637	299.9	-0.6326	-0.0006326	299.9	-0.6286	-0.0006286		299.9	-0.7084	-0.0007084	299.9	-0.6429	-0.0006429	299.9	-0.6377	-0.0006377	299.9	-0.6288
	300.4	-0.7084	-0.0007084	300.4	-0.6484	-0.0006484	300.4	-0.6396	-0.0006396	300.4	-0.6155	-0.0006155	300.4	-0.6134	-0.0006134	300.4	-0.5973	-0.0005973		300.4	-0.7084	-0.0007084	300.4	-0.6572	-0.0006572	300.4	-0.6441	-0.0006441	300.4	-0.637	-0.000637	300.4	-0.6326	-0.0006326	300.4	-0.6286	-0.0006286		300.4	-0.7084	-0.0007084	300.4	-0.6429	-0.0006429	300.4	-0.6377	-0.0006377	300.4	-0.6287
	300.9	-0.7084	-0.0007084	300.9	-0.6484	-0.0006484	300.9	-0.6396	-0.0006396	300.9	-0.6156	-0.0006156	300.9	-0.6134	-0.0006134	300.9	-0.5973	-0.0005973		300.9	-0.7084	-0.0007084	300.9	-0.6572	-0.0006572	300.9	-0.6441	-0.0006441	300.9	-0.637	-0.000637	300.9	-0.6326	-0.0006326	300.9	-0.6286	-0.0006286		300.9	-0.7084	-0.0007084	300.9	-0.6429	-0.0006429	300.9	-0.6377	-0.0006377	300.9	-0.6287
	301.4	-0.7084	-0.0007084	301.4	-0.6484	-0.0006484	301.4	-0.6396	-0.0006396	301.4	-0.6156	-0.0006156	301.4	-0.6134	-0.0006134	301.4	-0.5973	-0.0005973		301.4	-0.7084	-0.0007084	301.4	-0.6572	-0.0006572	301.4	-0.6441	-0.0006441	301.4	-0.637	-0.000637	301.4	-0.6326	-0.0006326	301.4	-0.6285	-0.0006285		301.4	-0.7084	-0.0007084	301.4	-0.643	-0.000643	301.4	-0.6377	-0.0006377	301.4	-0.6287
	301.9	-0.7084	-0.0007084	301.9	-0.6484	-0.0006484	301.9	-0.6396	-0.0006396	301.9	-0.6156	-0.0006156	301.9	-0.6134	-0.0006134	301.9	-0.5974	-0.0005974		301.9	-0.7084	-0.0007084	301.9	-0.6572	-0.0006572	301.9	-0.6441	-0.0006441	301.9	-0.637	-0.000637	301.9	-0.6326	-0.0006326	301.9	-0.6285	-0.0006285		301.9	-0.7084	-0.0007084	301.9	-0.643	-0.000643	301.9	-0.6377	-0.0006377	301.9	-0.6287
	302.4	-0.7084	-0.0007084	302.4	-0.6484	-0.0006484	302.4	-0.6396	-0.0006396	302.4	-0.6156	-0.0006156	302.4	-0.6135	-0.0006135	302.4	-0.5974	-0.0005974		302.4	-0.7084	-0.0007084	302.4	-0.6572	-0.0006572	302.4	-0.6441	-0.0006441	302.4	-0.637	-0.000637	302.4	-0.6327	-0.0006327	302.4	-0.6285	-0.0006285		302.4	-0.7084	-0.0007084	302.4	-0.643	-0.000643	302.4	-0.6377	-0.0006377	302.4	-0.6286
	302.9	-0.7083	-0.0007083	302.9	-0.6484	-0.0006484	302.9	-0.6396	-0.0006396	302.9	-0.6156	-0.0006156	302.9	-0.6135	-0.0006135	302.9	-0.5974	-0.0005974		302.9	-0.7083	-0.0007083	302.9	-0.6572	-0.0006572	302.9	-0.6441	-0.0006441	302.9	-0.637	-0.000637	302.9	-0.6327	-0.0006327	302.9	-0.6285	-0.0006285		302.9	-0.7083	-0.0007083	302.9	-0.6431	-0.0006431	302.9	-0.6377	-0.0006377	302.9	-0.6286
	303.5	-0.7083	-0.0007083	303.5	-0.6484	-0.0006484	303.5	-0.6396	-0.0006396	303.5	-0.6156	-0.0006156	303.5	-0.6135	-0.0006135	303.5	-0.5974	-0.0005974		303.5	-0.7083	-0.0007083	303.5	-0.6572	-0.0006572	303.5	-0.6441	-0.0006441	303.5	-0.637	-0.000637	303.5	-0.6327	-0.0006327	303.5	-0.6285	-0.0006285		303.5	-0.7083	-0.0007083	303.5	-0.6431	-0.0006431	303.5	-0.6377	-0.0006377	303.5	-0.6286
	304	-0.7083	-0.0007083	304	-0.6484	-0.0006484	304	-0.6396	-0.0006396	304	-0.6157	-0.0006157	304	-0.6135	-0.0006135	304	-0.5974	-0.0005974		304	-0.7083	-0.0007083	304	-0.6572	-0.0006572	304	-0.6442	-0.0006442	304	-0.637	-0.000637	304	-0.6326	-0.0006326	304	-0.6285	-0.0006285		304	-0.7083	-0.0007083	304	-0.6431	-0.0006431	304	-0.6377	-0.0006377	304	-0.6286
	304.5	-0.7083	-0.0007083	304.5	-0.6484	-0.0006484	304.5	-0.6396	-0.0006396	304.5	-0.6157	-0.0006157	304.5	-0.6136	-0.0006136	304.5	-0.5975	-0.0005975		304.5	-0.7083	-0.0007083	304.5	-0.6572	-0.0006572	304.5	-0.6442	-0.0006442	304.5	-0.637	-0.000637	304.5	-0.6326	-0.0006326	304.5	-0.6285	-0.0006285		304.5	-0.7083	-0.0007083	304.5	-0.6431	-0.0006431	304.5	-0.6377	-0.0006377	304.5	-0.6286
	305	-0.7082	-0.0007082	305	-0.6484	-0.0006484	305	-0.6396	-0.0006396	305	-0.6157	-0.0006157	305	-0.6136	-0.0006136	305	-0.5975	-0.0005975		305	-0.7082	-0.0007082	305	-0.6572	-0.0006572	305	-0.6442	-0.0006442	305	-0.637	-0.000637	305	-0.6326	-0.0006326	305	-0.6285	-0.0006285		305	-0.7082	-0.0007082	305	-0.6432	-0.0006432	305	-0.6377	-0.0006377	305	-0.6286
	305.5	-0.7082	-0.0007082	305.5	-0.6484	-0.0006484	305.5	-0.6396	-0.0006396	305.5	-0.6157	-0.0006157	305.5	-0.6136	-0.0006136	305.5	-0.5975	-0.0005975		305.5	-0.7082	-0.0007082	305.5	-0.6572	-0.0006572	305.5	-0.6442	-0.0006442	305.5	-0.637	-0.000637	305.5	-0.6327	-0.0006327	305.5	-0.6285	-0.0006285		305.5	-0.7082	-0.0007082	305.5	-0.6432	-0.0006432	305.5	-0.6377	-0.0006377	305.5	-0.6286
	306	-0.7082	-0.0007082	306	-0.6484	-0.0006484	306	-0.6396	-0.0006396	306	-0.6157	-0.0006157	306	-0.6137	-0.0006137	306	-0.5975	-0.0005975		306	-0.7082	-0.0007082	306	-0.6572	-0.0006572	306	-0.6442	-0.0006442	306	-0.637	-0.000637	306	-0.6327	-0.0006327	306	-0.6286	-0.0006286		306	-0.7082	-0.0007082	306	-0.6432	-0.0006432	306	-0.6377	-0.0006377	306	-0.6285
	306.5	-0.7081	-0.0007081	306.5	-0.6484	-0.0006484	306.5	-0.6396	-0.0006396	306.5	-0.6156	-0.0006156	306.5	-0.6137	-0.0006137	306.5	-0.5976	-0.0005976		306.5	-0.7081	-0.0007081	306.5	-0.6572	-0.0006572	306.5	-0.6442	-0.0006442	306.5	-0.637	-0.000637	306.5	-0.6327	-0.0006327	306.5	-0.6286	-0.0006286		306.5	-0.7081	-0.0007081	306.5	-0.6433	-0.0006433	306.5	-0.6377	-0.0006377	306.5	-0.6285
	307	-0.7081	-0.0007081	307	-0.6484	-0.0006484	307	-0.6396	-0.0006396	307	-0.6156	-0.0006156	307	-0.6137	-0.0006137	307	-0.5976	-0.0005976		307	-0.7081	-0.0007081	307	-0.6572	-0.0006572	307	-0.6442	-0.0006442	307	-0.637	-0.000637	307	-0.6327	-0.0006327	307	-0.6286	-0.0006286		307	-0.7081	-0.0007081	307	-0.6433	-0.0006433	307	-0.6377	-0.0006377	307	-0.6285
	307.5	-0.708	-0.000708	307.5	-0.6484	-0.0006484	307.5	-0.6396	-0.0006396	307.5	-0.6157	-0.0006157	307.5	-0.6137	-0.0006137	307.5	-0.5976	-0.0005976		307.5	-0.708	-0.000708	307.5	-0.6572	-0.0006572	307.5	-0.6442	-0.0006442	307.5	-0.637	-0.000637	307.5	-0.6327	-0.0006327	307.5	-0.6286	-0.0006286		307.5	-0.708	-0.000708	307.5	-0.6433	-0.0006433	307.5	-0.6377	-0.0006377	307.5	-0.6285
	308	-0.708	-0.000708	308	-0.6484	-0.0006484	308	-0.6396	-0.0006396	308	-0.6157	-0.0006157	308	-0.6138	-0.0006138	308	-0.5976	-0.0005976		308	-0.708	-0.000708	308	-0.6572	-0.0006572	308	-0.6442	-0.0006442	308	-0.637	-0.000637	308	-0.6327	-0.0006327	308	-0.6286	-0.0006286		308	-0.708	-0.000708	308	-0.6434	-0.0006434	308	-0.6377	-0.0006377	308	-0.6285
	308.5	-0.7079	-0.0007079	308.5	-0.6484	-0.0006484	308.5	-0.6397	-0.0006397	308.5	-0.6157	-0.0006157	308.5	-0.6138	-0.0006138	308.5	-0.5976	-0.0005976		308.5	-0.7079	-0.0007079	308.5	-0.6572	-0.0006572	308.5	-0.6442	-0.0006442	308.5	-0.6369	-0.0006369	308.5	-0.6327	-0.0006327	308.5	-0.6286	-0.0006286		308.5	-0.7079	-0.0007079	308.5	-0.6434	-0.0006434	308.5	-0.6377	-0.0006377	308.5	-0.6284
	309.1	-0.7079	-0.0007079	309.1	-0.6484	-0.0006484	309.1	-0.6397	-0.0006397	309.1	-0.6158	-0.0006158	309.1	-0.6138	-0.0006138	309.1	-0.5976	-0.0005976		309.1	-0.7079	-0.0007079	309.1	-0.6572	-0.0006572	309.1	-0.6442	-0.0006442	309.1	-0.6369	-0.0006369	309.1	-0.6327	-0.0006327	309.1	-0.6286	-0.0006286		309.1	-0.7079	-0.0007079	309.1	-0.6434	-0.0006434	309.1	-0.6377	-0.0006377	309.1	-0.6284
	309.6	-0.7078	-0.0007078	309.6	-0.6484	-0.0006484	309.6	-0.6397	-0.0006397	309.6	-0.6158	-0.0006158	309.6	-0.6138	-0.0006138	309.6	-0.5977	-0.0005977		309.6	-0.7078	-0.0007078	309.6	-0.6571	-0.0006571	309.6	-0.6442	-0.0006442	309.6	-0.6369	-0.0006369	309.6	-0.6327	-0.0006327	309.6	-0.6286	-0.0006286		309.6	-0.7078	-0.0007078	309.6	-0.6434	-0.0006434	309.6	-0.6377	-0.0006377	309.6	-0.6284
	310.1	-0.7078	-0.0007078	310.1	-0.6485	-0.0006485	310.1	-0.6397	-0.0006397	310.1	-0.6158	-0.0006158	310.1	-0.6138	-0.0006138	310.1	-0.5977	-0.0005977		310.1	-0.7078	-0.0007078	310.1	-0.6571	-0.0006571	310.1	-0.6442	-0.0006442	310.1	-0.6369	-0.0006369	310.1	-0.6327	-0.0006327	310.1	-0.6286	-0.0006286		310.1	-0.7078	-0.0007078	310.1	-0.6435	-0.0006435	310.1	-0.6377	-0.0006377	310.1	-0.6284
	310.6	-0.7078	-0.0007078	310.6	-0.6485	-0.0006485	310.6	-0.6397	-0.0006397	310.6	-0.6159	-0.0006159	310.6	-0.6139	-0.0006139	310.6	-0.5977	-0.0005977		310.6	-0.7078	-0.0007078	310.6	-0.6571	-0.0006571	310.6	-0.6442	-0.0006442	310.6	-0.6369	-0.0006369	310.6	-0.6327	-0.0006327	310.6	-0.6286	-0.0006286		310.6	-0.7078	-0.0007078	310.6	-0.6435	-0.0006435	310.6	-0.6377	-0.0006377	310.6	-0.6284
	311.1	-0.7077	-0.0007077	311.1	-0.6485	-0.0006485	311.1	-0.6397	-0.0006397	311.1	-0.6159	-0.0006159	311.1	-0.6139	-0.0006139	311.1	-0.5977	-0.0005977		311.1	-0.7077	-0.0007077	311.1	-0.6571	-0.0006571	311.1	-0.6442	-0.0006442	311.1	-0.6369	-0.0006369	311.1	-0.6327	-0.0006327	311.1	-0.6286	-0.0006286		311.1	-0.7077	-0.0007077	311.1	-0.6436	-0.0006436	311.1	-0.6377	-0.0006377	311.1	-0.6284
	311.6	-0.7077	-0.0007077	311.6	-0.6485	-0.0006485	311.6	-0.6397	-0.0006397	311.6	-0.6159	-0.0006159	311.6	-0.6139	-0.0006139	311.6	-0.5977	-0.0005977		311.6	-0.7077	-0.0007077	311.6	-0.6571	-0.0006571	311.6	-0.6442	-0.0006442	311.6	-0.6369	-0.0006369	311.6	-0.6327	-0.0006327	311.6	-0.6286	-0.0006286		311.6	-0.7077	-0.0007077	311.6	-0.6436	-0.0006436	311.6	-0.6377	-0.0006377	311.6	-0.6283
	312.1	-0.7077	-0.0007077	312.1	-0.6485	-0.0006485	312.1	-0.6397	-0.0006397	312.1	-0.6159	-0.0006159	312.1	-0.614	-0.000614	312.1	-0.5978	-0.0005978		312.1	-0.7077	-0.0007077	312.1	-0.6571	-0.0006571	312.1	-0.6442	-0.0006442	312.1	-0.6369	-0.0006369	312.1	-0.6327	-0.0006327	312.1	-0.6286	-0.0006286		312.1	-0.7077	-0.0007077	312.1	-0.6436	-0.0006436	312.1	-0.6377	-0.0006377	312.1	-0.6283
	312.6	-0.7077	-0.0007077	312.6	-0.6485	-0.0006485	312.6	-0.6397	-0.0006397	312.6	-0.6159	-0.0006159	312.6	-0.614	-0.000614	312.6	-0.5978	-0.0005978		312.6	-0.7077	-0.0007077	312.6	-0.6571	-0.0006571	312.6	-0.6442	-0.0006442	312.6	-0.6369	-0.0006369	312.6	-0.6327	-0.0006327	312.6	-0.6286	-0.0006286		312.6	-0.7077	-0.0007077	312.6	-0.6437	-0.0006437	312.6	-0.6377	-0.0006377	312.6	-0.6283
	313.1	-0.7077	-0.0007077	313.1	-0.6485	-0.0006485	313.1	-0.6397	-0.0006397	313.1	-0.6159	-0.0006159	313.1	-0.614	-0.000614	313.1	-0.5978	-0.0005978		313.1	-0.7077	-0.0007077	313.1	-0.6571	-0.0006571	313.1	-0.6442	-0.0006442	313.1	-0.6369	-0.0006369	313.1	-0.6327	-0.0006327	313.1	-0.6286	-0.0006286		313.1	-0.7077	-0.0007077	313.1	-0.6437	-0.0006437	313.1	-0.6377	-0.0006377	313.1	-0.6283
	313.6	-0.7076	-0.0007076	313.6	-0.6485	-0.0006485	313.6	-0.6397	-0.0006397	313.6	-0.6159	-0.0006159	313.6	-0.614	-0.000614	313.6	-0.5978	-0.0005978		313.6	-0.7076	-0.0007076	313.6	-0.6571	-0.0006571	313.6	-0.6442	-0.0006442	313.6	-0.6369	-0.0006369	313.6	-0.6327	-0.0006327	313.6	-0.6286	-0.0006286		313.6	-0.7076	-0.0007076	313.6	-0.6437	-0.0006437	313.6	-0.6377	-0.0006377	313.6	-0.6283
	314.2	-0.7076	-0.0007076	314.2	-0.6485	-0.0006485	314.2	-0.6397	-0.0006397	314.2	-0.6159	-0.0006159	314.2	-0.6141	-0.0006141	314.2	-0.5979	-0.0005979		314.2	-0.7076	-0.0007076	314.2	-0.6571	-0.0006571	314.2	-0.6442	-0.0006442	314.2	-0.6369	-0.0006369	314.2	-0.6327	-0.0006327	314.2	-0.6286	-0.0006286		314.2	-0.7076	-0.0007076	314.2	-0.6438	-0.0006438	314.2	-0.6377	-0.0006377	314.2	-0.6283
	314.7	-0.7076	-0.0007076	314.7	-0.6485	-0.0006485	314.7	-0.6397	-0.0006397	314.7	-0.6159	-0.0006159	314.7	-0.6141	-0.0006141	314.7	-0.5979	-0.0005979		314.7	-0.7076	-0.0007076	314.7	-0.6571	-0.0006571	314.7	-0.6442	-0.0006442	314.7	-0.6369	-0.0006369	314.7	-0.6327	-0.0006327	314.7	-0.6286	-0.0006286		314.7	-0.7076	-0.0007076	314.7	-0.6438	-0.0006438	314.7	-0.6377	-0.0006377	314.7	-0.6282
	315.2	-0.7076	-0.0007076	315.2	-0.6485	-0.0006485	315.2	-0.6397	-0.0006397	315.2	-0.6159	-0.0006159	315.2	-0.6141	-0.0006141	315.2	-0.5979	-0.0005979		315.2	-0.7076	-0.0007076	315.2	-0.6571	-0.0006571	315.2	-0.6442	-0.0006442	315.2	-0.6369	-0.0006369	315.2	-0.6327	-0.0006327	315.2	-0.6286	-0.0006286		315.2	-0.7076	-0.0007076	315.2	-0.6438	-0.0006438	315.2	-0.6377	-0.0006377	315.2	-0.6282
	315.7	-0.7076	-0.0007076	315.7	-0.6485	-0.0006485	315.7	-0.6397	-0.0006397	315.7	-0.616	-0.000616	315.7	-0.6141	-0.0006141	315.7	-0.5979	-0.0005979		315.7	-0.7076	-0.0007076	315.7	-0.6571	-0.0006571	315.7	-0.6442	-0.0006442	315.7	-0.6369	-0.0006369	315.7	-0.6326	-0.0006326	315.7	-0.6286	-0.0006286		315.7	-0.7076	-0.0007076	315.7	-0.6439	-0.0006439	315.7	-0.6377	-0.0006377	315.7	-0.6282
	316.2	-0.7075	-0.0007075	316.2	-0.6485	-0.0006485	316.2	-0.6397	-0.0006397	316.2	-0.616	-0.000616	316.2	-0.6142	-0.0006142	316.2	-0.598	-0.000598		316.2	-0.7075	-0.0007075	316.2	-0.657	-0.000657	316.2	-0.6442	-0.0006442	316.2	-0.6369	-0.0006369	316.2	-0.6326	-0.0006326	316.2	-0.6286	-0.0006286		316.2	-0.7075	-0.0007075	316.2	-0.6439	-0.0006439	316.2	-0.6377	-0.0006377	316.2	-0.6282
	316.7	-0.7075	-0.0007075	316.7	-0.6485	-0.0006485	316.7	-0.6397	-0.0006397	316.7	-0.6161	-0.0006161	316.7	-0.6142	-0.0006142	316.7	-0.598	-0.000598		316.7	-0.7075	-0.0007075	316.7	-0.657	-0.000657	316.7	-0.6442	-0.0006442	316.7	-0.6369	-0.0006369	316.7	-0.6326	-0.0006326	316.7	-0.6286	-0.0006286		316.7	-0.7075	-0.0007075	316.7	-0.6439	-0.0006439	316.7	-0.6377	-0.0006377	316.7	-0.6282
	317.2	-0.7075	-0.0007075	317.2	-0.6485	-0.0006485	317.2	-0.6397	-0.0006397	317.2	-0.6161	-0.0006161	317.2	-0.6142	-0.0006142	317.2	-0.598	-0.000598		317.2	-0.7075	-0.0007075	317.2	-0.657	-0.000657	317.2	-0.6442	-0.0006442	317.2	-0.6369	-0.0006369	317.2	-0.6326	-0.0006326	317.2	-0.6286	-0.0006286		317.2	-0.7075	-0.0007075	317.2	-0.6439	-0.0006439	317.2	-0.6377	-0.0006377	317.2	-0.6282
	317.7	-0.7074	-0.0007074	317.7	-0.6485	-0.0006485	317.7	-0.6398	-0.0006398	317.7	-0.6161	-0.0006161	317.7	-0.6142	-0.0006142	317.7	-0.598	-0.000598		317.7	-0.7074	-0.0007074	317.7	-0.657	-0.000657	317.7	-0.6442	-0.0006442	317.7	-0.6369	-0.0006369	317.7	-0.6326	-0.0006326	317.7	-0.6286	-0.0006286		317.7	-0.7074	-0.0007074	317.7	-0.6439	-0.0006439	317.7	-0.6377	-0.0006377	317.7	-0.6282
	318.2	-0.7074	-0.0007074	318.2	-0.6485	-0.0006485	318.2	-0.6398	-0.0006398	318.2	-0.6161	-0.0006161	318.2	-0.6143	-0.0006143	318.2	-0.5981	-0.0005981		318.2	-0.7074	-0.0007074	318.2	-0.657	-0.000657	318.2	-0.6442	-0.0006442	318.2	-0.6369	-0.0006369	318.2	-0.6326	-0.0006326	318.2	-0.6286	-0.0006286		318.2	-0.7074	-0.0007074	318.2	-0.644	-0.000644	318.2	-0.6377	-0.0006377	318.2	-0.6282
	318.8	-0.7073	-0.0007073	318.8	-0.6485	-0.0006485	318.8	-0.6398	-0.0006398	318.8	-0.6161	-0.0006161	318.8	-0.6143	-0.0006143	318.8	-0.5981	-0.0005981		318.8	-0.7073	-0.0007073	318.8	-0.657	-0.000657	318.8	-0.6442	-0.0006442	318.8	-0.6369	-0.0006369	318.8	-0.6326	-0.0006326	318.8	-0.6286	-0.0006286		318.8	-0.7073	-0.0007073	318.8	-0.644	-0.000644	318.8	-0.6377	-0.0006377	318.8	-0.6282
	319.3	-0.7073	-0.0007073	319.3	-0.6485	-0.0006485	319.3	-0.6398	-0.0006398	319.3	-0.6161	-0.0006161	319.3	-0.6143	-0.0006143	319.3	-0.5981	-0.0005981		319.3	-0.7073	-0.0007073	319.3	-0.6569	-0.0006569	319.3	-0.6442	-0.0006442	319.3	-0.6369	-0.0006369	319.3	-0.6326	-0.0006326	319.3	-0.6286	-0.0006286		319.3	-0.7073	-0.0007073	319.3	-0.644	-0.000644	319.3	-0.6377	-0.0006377	319.3	-0.6282
	319.8	-0.7073	-0.0007073	319.8	-0.6485	-0.0006485	319.8	-0.6398	-0.0006398	319.8	-0.6162	-0.0006162	319.8	-0.6143	-0.0006143	319.8	-0.5981	-0.0005981		319.8	-0.7073	-0.0007073	319.8	-0.6569	-0.0006569	319.8	-0.6442	-0.0006442	319.8	-0.6369	-0.0006369	319.8	-0.6326	-0.0006326	319.8	-0.6286	-0.0006286		319.8	-0.7073	-0.0007073	319.8	-0.644	-0.000644	319.8	-0.6377	-0.0006377	319.8	-0.6281
	320.3	-0.7072	-0.0007072	320.3	-0.6485	-0.0006485	320.3	-0.6398	-0.0006398	320.3	-0.6162	-0.0006162	320.3	-0.6144	-0.0006144	320.3	-0.5981	-0.0005981		320.3	-0.7072	-0.0007072	320.3	-0.6569	-0.0006569	320.3	-0.6442	-0.0006442	320.3	-0.6369	-0.0006369	320.3	-0.6326	-0.0006326	320.3	-0.6286	-0.0006286		320.3	-0.7072	-0.0007072	320.3	-0.6441	-0.0006441	320.3	-0.6377	-0.0006377	320.3	-0.6281
	320.8	-0.7072	-0.0007072	320.8	-0.6485	-0.0006485	320.8	-0.6398	-0.0006398	320.8	-0.6162	-0.0006162	320.8	-0.6144	-0.0006144	320.8	-0.5982	-0.0005982		320.8	-0.7072	-0.0007072	320.8	-0.6569	-0.0006569	320.8	-0.6442	-0.0006442	320.8	-0.6369	-0.0006369	320.8	-0.6326	-0.0006326	320.8	-0.6286	-0.0006286		320.8	-0.7072	-0.0007072	320.8	-0.6441	-0.0006441	320.8	-0.6377	-0.0006377	320.8	-0.6281
	321.3	-0.7072	-0.0007072	321.3	-0.6485	-0.0006485	321.3	-0.6398	-0.0006398	321.3	-0.6162	-0.0006162	321.3	-0.6144	-0.0006144	321.3	-0.5982	-0.0005982		321.3	-0.7072	-0.0007072	321.3	-0.6569	-0.0006569	321.3	-0.6442	-0.0006442	321.3	-0.6369	-0.0006369	321.3	-0.6326	-0.0006326	321.3	-0.6286	-0.0006286		321.3	-0.7072	-0.0007072	321.3	-0.6441	-0.0006441	321.3	-0.6377	-0.0006377	321.3	-0.6281
	321.8	-0.7072	-0.0007072	321.8	-0.6485	-0.0006485	321.8	-0.6398	-0.0006398	321.8	-0.6162	-0.0006162	321.8	-0.6145	-0.0006145	321.8	-0.5982	-0.0005982		321.8	-0.7072	-0.0007072	321.8	-0.6569	-0.0006569	321.8	-0.6442	-0.0006442	321.8	-0.6369	-0.0006369	321.8	-0.6326	-0.0006326	321.8	-0.6286	-0.0006286		321.8	-0.7072	-0.0007072	321.8	-0.6442	-0.0006442	321.8	-0.6377	-0.0006377	321.8	-0.6281
	322.3	-0.7072	-0.0007072	322.3	-0.6485	-0.0006485	322.3	-0.6398	-0.0006398	322.3	-0.6162	-0.0006162	322.3	-0.6145	-0.0006145	322.3	-0.5982	-0.0005982		322.3	-0.7072	-0.0007072	322.3	-0.6569	-0.0006569	322.3	-0.6442	-0.0006442	322.3	-0.6369	-0.0006369	322.3	-0.6326	-0.0006326	322.3	-0.6286	-0.0006286		322.3	-0.7072	-0.0007072	322.3	-0.6442	-0.0006442	322.3	-0.6377	-0.0006377	322.3	-0.6281
	322.8	-0.7072	-0.0007072	322.8	-0.6485	-0.0006485	322.8	-0.6398	-0.0006398	322.8	-0.6162	-0.0006162	322.8	-0.6145	-0.0006145	322.8	-0.5982	-0.0005982		322.8	-0.7072	-0.0007072	322.8	-0.6568	-0.0006568	322.8	-0.6442	-0.0006442	322.8	-0.6369	-0.0006369	322.8	-0.6326	-0.0006326	322.8	-0.6286	-0.0006286		322.8	-0.7072	-0.0007072	322.8	-0.6442	-0.0006442	322.8	-0.6377	-0.0006377	322.8	-0.628
	323.3	-0.7072	-0.0007072	323.3	-0.6485	-0.0006485	323.3	-0.6398	-0.0006398	323.3	-0.6162	-0.0006162	323.3	-0.6145	-0.0006145	323.3	-0.5983	-0.0005983		323.3	-0.7072	-0.0007072	323.3	-0.6568	-0.0006568	323.3	-0.6442	-0.0006442	323.3	-0.6369	-0.0006369	323.3	-0.6326	-0.0006326	323.3	-0.6286	-0.0006286		323.3	-0.7072	-0.0007072	323.3	-0.6442	-0.0006442	323.3	-0.6377	-0.0006377	323.3	-0.628
	323.9	-0.7072	-0.0007072	323.9	-0.6485	-0.0006485	323.9	-0.6398	-0.0006398	323.9	-0.6163	-0.0006163	323.9	-0.6146	-0.0006146	323.9	-0.5983	-0.0005983		323.9	-0.7072	-0.0007072	323.9	-0.6568	-0.0006568	323.9	-0.6442	-0.0006442	323.9	-0.6369	-0.0006369	323.9	-0.6326	-0.0006326	323.9	-0.6286	-0.0006286		323.9	-0.7072	-0.0007072	323.9	-0.6442	-0.0006442	323.9	-0.6377	-0.0006377	323.9	-0.628
	324.4	-0.7071	-0.0007071	324.4	-0.6485	-0.0006485	324.4	-0.6398	-0.0006398	324.4	-0.6163	-0.0006163	324.4	-0.6146	-0.0006146	324.4	-0.5983	-0.0005983		324.4	-0.7071	-0.0007071	324.4	-0.6568	-0.0006568	324.4	-0.6442	-0.0006442	324.4	-0.6369	-0.0006369	324.4	-0.6326	-0.0006326	324.4	-0.6286	-0.0006286		324.4	-0.7071	-0.0007071	324.4	-0.6442	-0.0006442	324.4	-0.6377	-0.0006377	324.4	-0.628
	324.9	-0.7071	-0.0007071	324.9	-0.6485	-0.0006485	324.9	-0.6398	-0.0006398	324.9	-0.6163	-0.0006163	324.9	-0.6146	-0.0006146	324.9	-0.5983	-0.0005983		324.9	-0.7071	-0.0007071	324.9	-0.6568	-0.0006568	324.9	-0.6442	-0.0006442	324.9	-0.6369	-0.0006369	324.9	-0.6326	-0.0006326	324.9	-0.6286	-0.0006286		324.9	-0.7071	-0.0007071	324.9	-0.6443	-0.0006443	324.9	-0.6377	-0.0006377	324.9	-0.628
	325.4	-0.7071	-0.0007071	325.4	-0.6485	-0.0006485	325.4	-0.6398	-0.0006398	325.4	-0.6163	-0.0006163	325.4	-0.6146	-0.0006146	325.4	-0.5983	-0.0005983		325.4	-0.7071	-0.0007071	325.4	-0.6568	-0.0006568	325.4	-0.6442	-0.0006442	325.4	-0.6369	-0.0006369	325.4	-0.6326	-0.0006326	325.4	-0.6286	-0.0006286		325.4	-0.7071	-0.0007071	325.4	-0.6443	-0.0006443	325.4	-0.6377	-0.0006377	325.4	-0.628
	325.9	-0.7071	-0.0007071	325.9	-0.6485	-0.0006485	325.9	-0.6398	-0.0006398	325.9	-0.6163	-0.0006163	325.9	-0.6147	-0.0006147	325.9	-0.5984	-0.0005984		325.9	-0.7071	-0.0007071	325.9	-0.6568	-0.0006568	325.9	-0.6442	-0.0006442	325.9	-0.6369	-0.0006369	325.9	-0.6326	-0.0006326	325.9	-0.6286	-0.0006286		325.9	-0.7071	-0.0007071	325.9	-0.6443	-0.0006443	325.9	-0.6377	-0.0006377	325.9	-0.628
	326.4	-0.707	-0.000707	326.4	-0.6485	-0.0006485	326.4	-0.6398	-0.0006398	326.4	-0.6163	-0.0006163	326.4	-0.6147	-0.0006147	326.4	-0.5984	-0.0005984		326.4	-0.707	-0.000707	326.4	-0.6568	-0.0006568	326.4	-0.6442	-0.0006442	326.4	-0.6369	-0.0006369	326.4	-0.6326	-0.0006326	326.4	-0.6286	-0.0006286		326.4	-0.707	-0.000707	326.4	-0.6443	-0.0006443	326.4	-0.6377	-0.0006377	326.4	-0.6279
	326.9	-0.707	-0.000707	326.9	-0.6485	-0.0006485	326.9	-0.6398	-0.0006398	326.9	-0.6163	-0.0006163	326.9	-0.6147	-0.0006147	326.9	-0.5984	-0.0005984		326.9	-0.707	-0.000707	326.9	-0.6568	-0.0006568	326.9	-0.6442	-0.0006442	326.9	-0.6369	-0.0006369	326.9	-0.6326	-0.0006326	326.9	-0.6286	-0.0006286		326.9	-0.707	-0.000707	326.9	-0.6443	-0.0006443	326.9	-0.6377	-0.0006377	326.9	-0.6279
	327.4	-0.707	-0.000707	327.4	-0.6485	-0.0006485	327.4	-0.6398	-0.0006398	327.4	-0.6163	-0.0006163	327.4	-0.6147	-0.0006147	327.4	-0.5984	-0.0005984		327.4	-0.707	-0.000707	327.4	-0.6568	-0.0006568	327.4	-0.6442	-0.0006442	327.4	-0.6369	-0.0006369	327.4	-0.6326	-0.0006326	327.4	-0.6286	-0.0006286		327.4	-0.707	-0.000707	327.4	-0.6443	-0.0006443	327.4	-0.6377	-0.0006377	327.4	-0.6279
	327.9	-0.7069	-0.0007069	327.9	-0.6485	-0.0006485	327.9	-0.6398	-0.0006398	327.9	-0.6164	-0.0006164	327.9	-0.6148	-0.0006148	327.9	-0.5984	-0.0005984		327.9	-0.7069	-0.0007069	327.9	-0.6568	-0.0006568	327.9	-0.6442	-0.0006442	327.9	-0.6369	-0.0006369	327.9	-0.6326	-0.0006326	327.9	-0.6286	-0.0006286		327.9	-0.7069	-0.0007069	327.9	-0.6443	-0.0006443	327.9	-0.6378	-0.0006378	327.9	-0.6279
	328.4	-0.7069	-0.0007069	328.4	-0.6485	-0.0006485	328.4	-0.6398	-0.0006398	328.4	-0.6164	-0.0006164	328.4	-0.6148	-0.0006148	328.4	-0.5985	-0.0005985		328.4	-0.7069	-0.0007069	328.4	-0.6568	-0.0006568	328.4	-0.6442	-0.0006442	328.4	-0.6369	-0.0006369	328.4	-0.6326	-0.0006326	328.4	-0.6286	-0.0006286		328.4	-0.7069	-0.0007069	328.4	-0.6443	-0.0006443	328.4	-0.6378	-0.0006378	328.4	-0.6279
	329	-0.7069	-0.0007069	329	-0.6485	-0.0006485	329	-0.6398	-0.0006398	329	-0.6164	-0.0006164	329	-0.6148	-0.0006148	329	-0.5985	-0.0005985		329	-0.7069	-0.0007069	329	-0.6567	-0.0006567	329	-0.6442	-0.0006442	329	-0.6369	-0.0006369	329	-0.6326	-0.0006326	329	-0.6286	-0.0006286		329	-0.7069	-0.0007069	329	-0.6444	-0.0006444	329	-0.6378	-0.0006378	329	-0.6279
	329.5	-0.7068	-0.0007068	329.5	-0.6485	-0.0006485	329.5	-0.6398	-0.0006398	329.5	-0.6164	-0.0006164	329.5	-0.6148	-0.0006148	329.5	-0.5985	-0.0005985		329.5	-0.7068	-0.0007068	329.5	-0.6567	-0.0006567	329.5	-0.6442	-0.0006442	329.5	-0.6369	-0.0006369	329.5	-0.6326	-0.0006326	329.5	-0.6286	-0.0006286		329.5	-0.7068	-0.0007068	329.5	-0.6444	-0.0006444	329.5	-0.6378	-0.0006378	329.5	-0.6279
	330	-0.7068	-0.0007068	330	-0.6485	-0.0006485	330	-0.6399	-0.0006399	330	-0.6164	-0.0006164	330	-0.6148	-0.0006148	330	-0.5985	-0.0005985		330	-0.7068	-0.0007068	330	-0.6567	-0.0006567	330	-0.6443	-0.0006443	330	-0.6369	-0.0006369	330	-0.6326	-0.0006326	330	-0.6286	-0.0006286		330	-0.7068	-0.0007068	330	-0.6445	-0.0006445	330	-0.6378	-0.0006378	330	-0.6278
	330.5	-0.7068	-0.0007068	330.5	-0.6485	-0.0006485	330.5	-0.6399	-0.0006399	330.5	-0.6164	-0.0006164	330.5	-0.6149	-0.0006149	330.5	-0.5985	-0.0005985		330.5	-0.7068	-0.0007068	330.5	-0.6567	-0.0006567	330.5	-0.6443	-0.0006443	330.5	-0.6369	-0.0006369	330.5	-0.6326	-0.0006326	330.5	-0.6286	-0.0006286		330.5	-0.7068	-0.0007068	330.5	-0.6445	-0.0006445	330.5	-0.6378	-0.0006378	330.5	-0.6278
	331	-0.7067	-0.0007067	331	-0.6485	-0.0006485	331	-0.6399	-0.0006399	331	-0.6164	-0.0006164	331	-0.6149	-0.0006149	331	-0.5986	-0.0005986		331	-0.7067	-0.0007067	331	-0.6567	-0.0006567	331	-0.6443	-0.0006443	331	-0.6369	-0.0006369	331	-0.6326	-0.0006326	331	-0.6286	-0.0006286		331	-0.7067	-0.0007067	331	-0.6446	-0.0006446	331	-0.6378	-0.0006378	331	-0.6278
	331.5	-0.7067	-0.0007067	331.5	-0.6485	-0.0006485	331.5	-0.6399	-0.0006399	331.5	-0.6165	-0.0006165	331.5	-0.6149	-0.0006149	331.5	-0.5986	-0.0005986		331.5	-0.7067	-0.0007067	331.5	-0.6566	-0.0006566	331.5	-0.6443	-0.0006443	331.5	-0.6369	-0.0006369	331.5	-0.6326	-0.0006326	331.5	-0.6286	-0.0006286		331.5	-0.7067	-0.0007067	331.5	-0.6446	-0.0006446	331.5	-0.6378	-0.0006378	331.5	-0.6278
	332	-0.7067	-0.0007067	332	-0.6485	-0.0006485	332	-0.6399	-0.0006399	332	-0.6165	-0.0006165	332	-0.6149	-0.0006149	332	-0.5986	-0.0005986		332	-0.7067	-0.0007067	332	-0.6566	-0.0006566	332	-0.6443	-0.0006443	332	-0.6369	-0.0006369	332	-0.6326	-0.0006326	332	-0.6286	-0.0006286		332	-0.7067	-0.0007067	332	-0.6446	-0.0006446	332	-0.6378	-0.0006378	332	-0.6278
	332.5	-0.7067	-0.0007067	332.5	-0.6485	-0.0006485	332.5	-0.6399	-0.0006399	332.5	-0.6165	-0.0006165	332.5	-0.615	-0.000615	332.5	-0.5986	-0.0005986		332.5	-0.7067	-0.0007067	332.5	-0.6566	-0.0006566	332.5	-0.6443	-0.0006443	332.5	-0.6369	-0.0006369	332.5	-0.6326	-0.0006326	332.5	-0.6286	-0.0006286		332.5	-0.7067	-0.0007067	332.5	-0.6447	-0.0006447	332.5	-0.6378	-0.0006378	332.5	-0.6277
	333	-0.7066	-0.0007066	333	-0.6485	-0.0006485	333	-0.6399	-0.0006399	333	-0.6165	-0.0006165	333	-0.615	-0.000615	333	-0.5986	-0.0005986		333	-0.7066	-0.0007066	333	-0.6566	-0.0006566	333	-0.6443	-0.0006443	333	-0.6369	-0.0006369	333	-0.6326	-0.0006326	333	-0.6286	-0.0006286		333	-0.7066	-0.0007066	333	-0.6447	-0.0006447	333	-0.6378	-0.0006378	333	-0.6277
	333.5	-0.7066	-0.0007066	333.5	-0.6486	-0.0006486	333.5	-0.6399	-0.0006399	333.5	-0.6165	-0.0006165	333.5	-0.615	-0.000615	333.5	-0.5987	-0.0005987		333.5	-0.7066	-0.0007066	333.5	-0.6566	-0.0006566	333.5	-0.6443	-0.0006443	333.5	-0.6369	-0.0006369	333.5	-0.6326	-0.0006326	333.5	-0.6286	-0.0006286		333.5	-0.7066	-0.0007066	333.5	-0.6447	-0.0006447	333.5	-0.6378	-0.0006378	333.5	-0.6277
	334	-0.7066	-0.0007066	334	-0.6486	-0.0006486	334	-0.6399	-0.0006399	334	-0.6165	-0.0006165	334	-0.615	-0.000615	334	-0.5987	-0.0005987		334	-0.7066	-0.0007066	334	-0.6566	-0.0006566	334	-0.6442	-0.0006442	334	-0.6369	-0.0006369	334	-0.6326	-0.0006326	334	-0.6286	-0.0006286		334	-0.7066	-0.0007066	334	-0.6447	-0.0006447	334	-0.6378	-0.0006378	334	-0.6277
	334.6	-0.7065	-0.0007065	334.6	-0.6486	-0.0006486	334.6	-0.6399	-0.0006399	334.6	-0.6166	-0.0006166	334.6	-0.6151	-0.0006151	334.6	-0.5987	-0.0005987		334.6	-0.7065	-0.0007065	334.6	-0.6566	-0.0006566	334.6	-0.6442	-0.0006442	334.6	-0.6369	-0.0006369	334.6	-0.6326	-0.0006326	334.6	-0.6287	-0.0006287		334.6	-0.7065	-0.0007065	334.6	-0.6447	-0.0006447	334.6	-0.6378	-0.0006378	334.6	-0.6277
	335.1	-0.7065	-0.0007065	335.1	-0.6486	-0.0006486	335.1	-0.6399	-0.0006399	335.1	-0.6166	-0.0006166	335.1	-0.6151	-0.0006151	335.1	-0.5987	-0.0005987		335.1	-0.7065	-0.0007065	335.1	-0.6565	-0.0006565	335.1	-0.6442	-0.0006442	335.1	-0.6369	-0.0006369	335.1	-0.6326	-0.0006326	335.1	-0.6287	-0.0006287		335.1	-0.7065	-0.0007065	335.1	-0.6447	-0.0006447	335.1	-0.6378	-0.0006378	335.1	-0.6277
	335.6	-0.7064	-0.0007064	335.6	-0.6486	-0.0006486	335.6	-0.6399	-0.0006399	335.6	-0.6166	-0.0006166	335.6	-0.6151	-0.0006151	335.6	-0.5987	-0.0005987		335.6	-0.7064	-0.0007064	335.6	-0.6565	-0.0006565	335.6	-0.6442	-0.0006442	335.6	-0.6369	-0.0006369	335.6	-0.6326	-0.0006326	335.6	-0.6287	-0.0006287		335.6	-0.7064	-0.0007064	335.6	-0.6447	-0.0006447	335.6	-0.6378	-0.0006378	335.6	-0.6276
	336.1	-0.7064	-0.0007064	336.1	-0.6486	-0.0006486	336.1	-0.6399	-0.0006399	336.1	-0.6166	-0.0006166	336.1	-0.6151	-0.0006151	336.1	-0.5987	-0.0005987		336.1	-0.7064	-0.0007064	336.1	-0.6565	-0.0006565	336.1	-0.6443	-0.0006443	336.1	-0.6369	-0.0006369	336.1	-0.6326	-0.0006326	336.1	-0.6287	-0.0006287		336.1	-0.7064	-0.0007064	336.1	-0.6447	-0.0006447	336.1	-0.6378	-0.0006378	336.1	-0.6276
	336.6	-0.7064	-0.0007064	336.6	-0.6486	-0.0006486	336.6	-0.6399	-0.0006399	336.6	-0.6166	-0.0006166	336.6	-0.6152	-0.0006152	336.6	-0.5988	-0.0005988		336.6	-0.7064	-0.0007064	336.6	-0.6565	-0.0006565	336.6	-0.6443	-0.0006443	336.6	-0.6369	-0.0006369	336.6	-0.6326	-0.0006326	336.6	-0.6287	-0.0006287		336.6	-0.7064	-0.0007064	336.6	-0.6447	-0.0006447	336.6	-0.6378	-0.0006378	336.6	-0.6276
	337.1	-0.7063	-0.0007063	337.1	-0.6486	-0.0006486	337.1	-0.6399	-0.0006399	337.1	-0.6166	-0.0006166	337.1	-0.6152	-0.0006152	337.1	-0.5988	-0.0005988		337.1	-0.7063	-0.0007063	337.1	-0.6565	-0.0006565	337.1	-0.6443	-0.0006443	337.1	-0.6369	-0.0006369	337.1	-0.6326	-0.0006326	337.1	-0.6287	-0.0006287		337.1	-0.7063	-0.0007063	337.1	-0.6448	-0.0006448	337.1	-0.6378	-0.0006378	337.1	-0.6276
	337.6	-0.7063	-0.0007063	337.6	-0.6486	-0.0006486	337.6	-0.6399	-0.0006399	337.6	-0.6166	-0.0006166	337.6	-0.6152	-0.0006152	337.6	-0.5988	-0.0005988		337.6	-0.7063	-0.0007063	337.6	-0.6565	-0.0006565	337.6	-0.6443	-0.0006443	337.6	-0.6369	-0.0006369	337.6	-0.6326	-0.0006326	337.6	-0.6287	-0.0006287		337.6	-0.7063	-0.0007063	337.6	-0.6448	-0.0006448	337.6	-0.6378	-0.0006378	337.6	-0.6276
	338.1	-0.7063	-0.0007063	338.1	-0.6486	-0.0006486	338.1	-0.6399	-0.0006399	338.1	-0.6166	-0.0006166	338.1	-0.6152	-0.0006152	338.1	-0.5988	-0.0005988		338.1	-0.7063	-0.0007063	338.1	-0.6564	-0.0006564	338.1	-0.6443	-0.0006443	338.1	-0.6369	-0.0006369	338.1	-0.6326	-0.0006326	338.1	-0.6287	-0.0006287		338.1	-0.7063	-0.0007063	338.1	-0.6448	-0.0006448	338.1	-0.6378	-0.0006378	338.1	-0.6276
	338.6	-0.7062	-0.0007062	338.6	-0.6486	-0.0006486	338.6	-0.6399	-0.0006399	338.6	-0.6166	-0.0006166	338.6	-0.6153	-0.0006153	338.6	-0.5988	-0.0005988		338.6	-0.7062	-0.0007062	338.6	-0.6564	-0.0006564	338.6	-0.6443	-0.0006443	338.6	-0.6369	-0.0006369	338.6	-0.6326	-0.0006326	338.6	-0.6287	-0.0006287		338.6	-0.7062	-0.0007062	338.6	-0.6449	-0.0006449	338.6	-0.6378	-0.0006378	338.6	-0.6276
	339.1	-0.7062	-0.0007062	339.1	-0.6486	-0.0006486	339.1	-0.6399	-0.0006399	339.1	-0.6166	-0.0006166	339.1	-0.6153	-0.0006153	339.1	-0.5989	-0.0005989		339.1	-0.7062	-0.0007062	339.1	-0.6564	-0.0006564	339.1	-0.6443	-0.0006443	339.1	-0.6369	-0.0006369	339.1	-0.6326	-0.0006326	339.1	-0.6287	-0.0006287		339.1	-0.7062	-0.0007062	339.1	-0.6449	-0.0006449	339.1	-0.6378	-0.0006378	339.1	-0.6276
	339.7	-0.7062	-0.0007062	339.7	-0.6486	-0.0006486	339.7	-0.6399	-0.0006399	339.7	-0.6167	-0.0006167	339.7	-0.6153	-0.0006153	339.7	-0.5989	-0.0005989		339.7	-0.7062	-0.0007062	339.7	-0.6564	-0.0006564	339.7	-0.6443	-0.0006443	339.7	-0.6368	-0.0006368	339.7	-0.6326	-0.0006326	339.7	-0.6286	-0.0006286		339.7	-0.7062	-0.0007062	339.7	-0.6449	-0.0006449	339.7	-0.6378	-0.0006378	339.7	-0.6276
	340.2	-0.7061	-0.0007061	340.2	-0.6486	-0.0006486	340.2	-0.6399	-0.0006399	340.2	-0.6167	-0.0006167	340.2	-0.6153	-0.0006153	340.2	-0.5989	-0.0005989		340.2	-0.7061	-0.0007061	340.2	-0.6564	-0.0006564	340.2	-0.6443	-0.0006443	340.2	-0.6369	-0.0006369	340.2	-0.6326	-0.0006326	340.2	-0.6286	-0.0006286		340.2	-0.7061	-0.0007061	340.2	-0.6449	-0.0006449	340.2	-0.6378	-0.0006378	340.2	-0.6275
	340.7	-0.7061	-0.0007061	340.7	-0.6486	-0.0006486	340.7	-0.6399	-0.0006399	340.7	-0.6168	-0.0006168	340.7	-0.6154	-0.0006154	340.7	-0.5989	-0.0005989		340.7	-0.7061	-0.0007061	340.7	-0.6564	-0.0006564	340.7	-0.6443	-0.0006443	340.7	-0.6369	-0.0006369	340.7	-0.6326	-0.0006326	340.7	-0.6286	-0.0006286		340.7	-0.7061	-0.0007061	340.7	-0.645	-0.000645	340.7	-0.6378	-0.0006378	340.7	-0.6275
	341.2	-0.706	-0.000706	341.2	-0.6486	-0.0006486	341.2	-0.6399	-0.0006399	341.2	-0.6168	-0.0006168	341.2	-0.6154	-0.0006154	341.2	-0.5989	-0.0005989		341.2	-0.706	-0.000706	341.2	-0.6563	-0.0006563	341.2	-0.6443	-0.0006443	341.2	-0.6369	-0.0006369	341.2	-0.6326	-0.0006326	341.2	-0.6286	-0.0006286		341.2	-0.706	-0.000706	341.2	-0.645	-0.000645	341.2	-0.6378	-0.0006378	341.2	-0.6275
	341.7	-0.706	-0.000706	341.7	-0.6486	-0.0006486	341.7	-0.6399	-0.0006399	341.7	-0.6168	-0.0006168	341.7	-0.6154	-0.0006154	341.7	-0.5989	-0.0005989		341.7	-0.706	-0.000706	341.7	-0.6563	-0.0006563	341.7	-0.6443	-0.0006443	341.7	-0.6369	-0.0006369	341.7	-0.6326	-0.0006326	341.7	-0.6286	-0.0006286		341.7	-0.706	-0.000706	341.7	-0.645	-0.000645	341.7	-0.6378	-0.0006378	341.7	-0.6275
	342.2	-0.706	-0.000706	342.2	-0.6486	-0.0006486	342.2	-0.6399	-0.0006399	342.2	-0.6168	-0.0006168	342.2	-0.6155	-0.0006155	342.2	-0.5989	-0.0005989		342.2	-0.706	-0.000706	342.2	-0.6563	-0.0006563	342.2	-0.6443	-0.0006443	342.2	-0.6369	-0.0006369	342.2	-0.6326	-0.0006326	342.2	-0.6286	-0.0006286		342.2	-0.706	-0.000706	342.2	-0.645	-0.000645	342.2	-0.6378	-0.0006378	342.2	-0.6275
	342.7	-0.7059	-0.0007059	342.7	-0.6486	-0.0006486	342.7	-0.6399	-0.0006399	342.7	-0.6168	-0.0006168	342.7	-0.6155	-0.0006155	342.7	-0.599	-0.000599		342.7	-0.7059	-0.0007059	342.7	-0.6563	-0.0006563	342.7	-0.6443	-0.0006443	342.7	-0.6369	-0.0006369	342.7	-0.6326	-0.0006326	342.7	-0.6286	-0.0006286		342.7	-0.7059	-0.0007059	342.7	-0.645	-0.000645	342.7	-0.6378	-0.0006378	342.7	-0.6275
	343.2	-0.7059	-0.0007059	343.2	-0.6486	-0.0006486	343.2	-0.64	-0.00064	343.2	-0.6168	-0.0006168	343.2	-0.6155	-0.0006155	343.2	-0.599	-0.000599		343.2	-0.7059	-0.0007059	343.2	-0.6563	-0.0006563	343.2	-0.6443	-0.0006443	343.2	-0.6369	-0.0006369	343.2	-0.6326	-0.0006326	343.2	-0.6286	-0.0006286		343.2	-0.7059	-0.0007059	343.2	-0.6451	-0.0006451	343.2	-0.6378	-0.0006378	343.2	-0.6274
	343.7	-0.7059	-0.0007059	343.7	-0.6486	-0.0006486	343.7	-0.64	-0.00064	343.7	-0.6167	-0.0006167	343.7	-0.6155	-0.0006155	343.7	-0.599	-0.000599		343.7	-0.7059	-0.0007059	343.7	-0.6563	-0.0006563	343.7	-0.6443	-0.0006443	343.7	-0.6369	-0.0006369	343.7	-0.6326	-0.0006326	343.7	-0.6286	-0.0006286		343.7	-0.7059	-0.0007059	343.7	-0.6451	-0.0006451	343.7	-0.6378	-0.0006378	343.7	-0.6274
	344.3	-0.7058	-0.0007058	344.3	-0.6486	-0.0006486	344.3	-0.64	-0.00064	344.3	-0.6168	-0.0006168	344.3	-0.6156	-0.0006156	344.3	-0.599	-0.000599		344.3	-0.7058	-0.0007058	344.3	-0.6563	-0.0006563	344.3	-0.6442	-0.0006442	344.3	-0.6369	-0.0006369	344.3	-0.6326	-0.0006326	344.3	-0.6286	-0.0006286		344.3	-0.7058	-0.0007058	344.3	-0.6451	-0.0006451	344.3	-0.6378	-0.0006378	344.3	-0.6274
	344.8	-0.7058	-0.0007058	344.8	-0.6487	-0.0006487	344.8	-0.64	-0.00064	344.8	-0.6168	-0.0006168	344.8	-0.6156	-0.0006156	344.8	-0.599	-0.000599		344.8	-0.7058	-0.0007058	344.8	-0.6562	-0.0006562	344.8	-0.6442	-0.0006442	344.8	-0.6369	-0.0006369	344.8	-0.6326	-0.0006326	344.8	-0.6286	-0.0006286		344.8	-0.7058	-0.0007058	344.8	-0.6451	-0.0006451	344.8	-0.6378	-0.0006378	344.8	-0.6274
	345.3	-0.7058	-0.0007058	345.3	-0.6487	-0.0006487	345.3	-0.64	-0.00064	345.3	-0.6168	-0.0006168	345.3	-0.6156	-0.0006156	345.3	-0.599	-0.000599		345.3	-0.7058	-0.0007058	345.3	-0.6562	-0.0006562	345.3	-0.6442	-0.0006442	345.3	-0.6369	-0.0006369	345.3	-0.6326	-0.0006326	345.3	-0.6286	-0.0006286		345.3	-0.7058	-0.0007058	345.3	-0.6451	-0.0006451	345.3	-0.6378	-0.0006378	345.3	-0.6274
	345.8	-0.7058	-0.0007058	345.8	-0.6487	-0.0006487	345.8	-0.64	-0.00064	345.8	-0.6168	-0.0006168	345.8	-0.6156	-0.0006156	345.8	-0.5991	-0.0005991		345.8	-0.7058	-0.0007058	345.8	-0.6562	-0.0006562	345.8	-0.6442	-0.0006442	345.8	-0.6368	-0.0006368	345.8	-0.6326	-0.0006326	345.8	-0.6286	-0.0006286		345.8	-0.7058	-0.0007058	345.8	-0.6451	-0.0006451	345.8	-0.6378	-0.0006378	345.8	-0.6274
	346.3	-0.7057	-0.0007057	346.3	-0.6487	-0.0006487	346.3	-0.64	-0.00064	346.3	-0.6169	-0.0006169	346.3	-0.6157	-0.0006157	346.3	-0.5991	-0.0005991		346.3	-0.7057	-0.0007057	346.3	-0.6562	-0.0006562	346.3	-0.6442	-0.0006442	346.3	-0.6368	-0.0006368	346.3	-0.6326	-0.0006326	346.3	-0.6286	-0.0006286		346.3	-0.7057	-0.0007057	346.3	-0.6451	-0.0006451	346.3	-0.6378	-0.0006378	346.3	-0.6274
	346.8	-0.7057	-0.0007057	346.8	-0.6487	-0.0006487	346.8	-0.64	-0.00064	346.8	-0.6169	-0.0006169	346.8	-0.6157	-0.0006157	346.8	-0.5991	-0.0005991		346.8	-0.7057	-0.0007057	346.8	-0.6562	-0.0006562	346.8	-0.6442	-0.0006442	346.8	-0.6368	-0.0006368	346.8	-0.6326	-0.0006326	346.8	-0.6286	-0.0006286		346.8	-0.7057	-0.0007057	346.8	-0.6452	-0.0006452	346.8	-0.6378	-0.0006378	346.8	-0.6273
	347.3	-0.7057	-0.0007057	347.3	-0.6487	-0.0006487	347.3	-0.64	-0.00064	347.3	-0.617	-0.000617	347.3	-0.6157	-0.0006157	347.3	-0.5991	-0.0005991		347.3	-0.7057	-0.0007057	347.3	-0.6562	-0.0006562	347.3	-0.6442	-0.0006442	347.3	-0.6368	-0.0006368	347.3	-0.6326	-0.0006326	347.3	-0.6286	-0.0006286		347.3	-0.7057	-0.0007057	347.3	-0.6452	-0.0006452	347.3	-0.6378	-0.0006378	347.3	-0.6273
	347.8	-0.7058	-0.0007058	347.8	-0.6487	-0.0006487	347.8	-0.64	-0.00064	347.8	-0.617	-0.000617	347.8	-0.6157	-0.0006157	347.8	-0.5991	-0.0005991		347.8	-0.7058	-0.0007058	347.8	-0.6562	-0.0006562	347.8	-0.6442	-0.0006442	347.8	-0.6368	-0.0006368	347.8	-0.6326	-0.0006326	347.8	-0.6286	-0.0006286		347.8	-0.7058	-0.0007058	347.8	-0.6452	-0.0006452	347.8	-0.6378	-0.0006378	347.8	-0.6273
	348.3	-0.7058	-0.0007058	348.3	-0.6487	-0.0006487	348.3	-0.64	-0.00064	348.3	-0.617	-0.000617	348.3	-0.6158	-0.0006158	348.3	-0.5991	-0.0005991		348.3	-0.7058	-0.0007058	348.3	-0.6562	-0.0006562	348.3	-0.6442	-0.0006442	348.3	-0.6368	-0.0006368	348.3	-0.6325	-0.0006325	348.3	-0.6286	-0.0006286		348.3	-0.7058	-0.0007058	348.3	-0.6453	-0.0006453	348.3	-0.6378	-0.0006378	348.3	-0.6273
	348.8	-0.7058	-0.0007058	348.8	-0.6487	-0.0006487	348.8	-0.64	-0.00064	348.8	-0.6171	-0.0006171	348.8	-0.6158	-0.0006158	348.8	-0.5992	-0.0005992		348.8	-0.7058	-0.0007058	348.8	-0.6562	-0.0006562	348.8	-0.6442	-0.0006442	348.8	-0.6368	-0.0006368	348.8	-0.6325	-0.0006325	348.8	-0.6286	-0.0006286		348.8	-0.7058	-0.0007058	348.8	-0.6453	-0.0006453	348.8	-0.6378	-0.0006378	348.8	-0.6273
	349.4	-0.7057	-0.0007057	349.4	-0.6487	-0.0006487	349.4	-0.64	-0.00064	349.4	-0.6171	-0.0006171	349.4	-0.6158	-0.0006158	349.4	-0.5992	-0.0005992		349.4	-0.7057	-0.0007057	349.4	-0.6562	-0.0006562	349.4	-0.6442	-0.0006442	349.4	-0.6368	-0.0006368	349.4	-0.6325	-0.0006325	349.4	-0.6286	-0.0006286		349.4	-0.7057	-0.0007057	349.4	-0.6453	-0.0006453	349.4	-0.6378	-0.0006378	349.4	-0.6273
	349.9	-0.7057	-0.0007057	349.9	-0.6487	-0.0006487	349.9	-0.64	-0.00064	349.9	-0.6171	-0.0006171	349.9	-0.6158	-0.0006158	349.9	-0.5992	-0.0005992		349.9	-0.7057	-0.0007057	349.9	-0.6562	-0.0006562	349.9	-0.6442	-0.0006442	349.9	-0.6368	-0.0006368	349.9	-0.6325	-0.0006325	349.9	-0.6286	-0.0006286		349.9	-0.7057	-0.0007057	349.9	-0.6453	-0.0006453	349.9	-0.6378	-0.0006378	349.9	-0.6273
	350.4	-0.7057	-0.0007057	350.4	-0.6487	-0.0006487	350.4	-0.64	-0.00064	350.4	-0.6172	-0.0006172	350.4	-0.6159	-0.0006159	350.4	-0.5992	-0.0005992		350.4	-0.7057	-0.0007057	350.4	-0.6562	-0.0006562	350.4	-0.6442	-0.0006442	350.4	-0.6368	-0.0006368	350.4	-0.6325	-0.0006325	350.4	-0.6286	-0.0006286		350.4	-0.7057	-0.0007057	350.4	-0.6453	-0.0006453	350.4	-0.6378	-0.0006378	350.4	-0.6272
	350.9	-0.7056	-0.0007056	350.9	-0.6487	-0.0006487	350.9	-0.64	-0.00064	350.9	-0.6172	-0.0006172	350.9	-0.6159	-0.0006159	350.9	-0.5993	-0.0005993		350.9	-0.7056	-0.0007056	350.9	-0.6562	-0.0006562	350.9	-0.6442	-0.0006442	350.9	-0.6368	-0.0006368	350.9	-0.6325	-0.0006325	350.9	-0.6286	-0.0006286		350.9	-0.7056	-0.0007056	350.9	-0.6453	-0.0006453	350.9	-0.6378	-0.0006378	350.9	-0.6272
	351.4	-0.7056	-0.0007056	351.4	-0.6488	-0.0006488	351.4	-0.64	-0.00064	351.4	-0.6172	-0.0006172	351.4	-0.6159	-0.0006159	351.4	-0.5993	-0.0005993		351.4	-0.7056	-0.0007056	351.4	-0.6562	-0.0006562	351.4	-0.6442	-0.0006442	351.4	-0.6368	-0.0006368	351.4	-0.6325	-0.0006325	351.4	-0.6286	-0.0006286		351.4	-0.7056	-0.0007056	351.4	-0.6453	-0.0006453	351.4	-0.6378	-0.0006378	351.4	-0.6272
	351.9	-0.7055	-0.0007055	351.9	-0.6488	-0.0006488	351.9	-0.64	-0.00064	351.9	-0.6172	-0.0006172	351.9	-0.6159	-0.0006159	351.9	-0.5993	-0.0005993		351.9	-0.7055	-0.0007055	351.9	-0.6562	-0.0006562	351.9	-0.6442	-0.0006442	351.9	-0.6368	-0.0006368	351.9	-0.6325	-0.0006325	351.9	-0.6286	-0.0006286		351.9	-0.7055	-0.0007055	351.9	-0.6453	-0.0006453	351.9	-0.6378	-0.0006378	351.9	-0.6272
	352.4	-0.7055	-0.0007055	352.4	-0.6488	-0.0006488	352.4	-0.64	-0.00064	352.4	-0.6172	-0.0006172	352.4	-0.616	-0.000616	352.4	-0.5993	-0.0005993		352.4	-0.7055	-0.0007055	352.4	-0.6562	-0.0006562	352.4	-0.6442	-0.0006442	352.4	-0.6368	-0.0006368	352.4	-0.6325	-0.0006325	352.4	-0.6286	-0.0006286		352.4	-0.7055	-0.0007055	352.4	-0.6453	-0.0006453	352.4	-0.6378	-0.0006378	352.4	-0.6272
	352.9	-0.7055	-0.0007055	352.9	-0.6488	-0.0006488	352.9	-0.64	-0.00064	352.9	-0.6172	-0.0006172	352.9	-0.616	-0.000616	352.9	-0.5993	-0.0005993		352.9	-0.7055	-0.0007055	352.9	-0.6562	-0.0006562	352.9	-0.6442	-0.0006442	352.9	-0.6368	-0.0006368	352.9	-0.6325	-0.0006325	352.9	-0.6286	-0.0006286		352.9	-0.7055	-0.0007055	352.9	-0.6454	-0.0006454	352.9	-0.6378	-0.0006378	352.9	-0.6272
	353.4	-0.7055	-0.0007055	353.4	-0.6488	-0.0006488	353.4	-0.64	-0.00064	353.4	-0.6172	-0.0006172	353.4	-0.616	-0.000616	353.4	-0.5994	-0.0005994		353.4	-0.7055	-0.0007055	353.4	-0.6561	-0.0006561	353.4	-0.6442	-0.0006442	353.4	-0.6368	-0.0006368	353.4	-0.6325	-0.0006325	353.4	-0.6286	-0.0006286		353.4	-0.7055	-0.0007055	353.4	-0.6454	-0.0006454	353.4	-0.6378	-0.0006378	353.4	-0.6272
	353.9	-0.7055	-0.0007055	353.9	-0.6488	-0.0006488	353.9	-0.64	-0.00064	353.9	-0.6171	-0.0006171	353.9	-0.616	-0.000616	353.9	-0.5994	-0.0005994		353.9	-0.7055	-0.0007055	353.9	-0.6561	-0.0006561	353.9	-0.6442	-0.0006442	353.9	-0.6368	-0.0006368	353.9	-0.6325	-0.0006325	353.9	-0.6286	-0.0006286		353.9	-0.7055	-0.0007055	353.9	-0.6454	-0.0006454	353.9	-0.6378	-0.0006378	353.9	-0.6272
	354.5	-0.7055	-0.0007055	354.5	-0.6488	-0.0006488	354.5	-0.64	-0.00064	354.5	-0.6171	-0.0006171	354.5	-0.6161	-0.0006161	354.5	-0.5994	-0.0005994		354.5	-0.7055	-0.0007055	354.5	-0.6561	-0.0006561	354.5	-0.6442	-0.0006442	354.5	-0.6368	-0.0006368	354.5	-0.6325	-0.0006325	354.5	-0.6286	-0.0006286		354.5	-0.7055	-0.0007055	354.5	-0.6454	-0.0006454	354.5	-0.6378	-0.0006378	354.5	-0.6271
	355	-0.7055	-0.0007055	355	-0.6488	-0.0006488	355	-0.64	-0.00064	355	-0.6171	-0.0006171	355	-0.6161	-0.0006161	355	-0.5994	-0.0005994		355	-0.7055	-0.0007055	355	-0.6561	-0.0006561	355	-0.6442	-0.0006442	355	-0.6368	-0.0006368	355	-0.6325	-0.0006325	355	-0.6286	-0.0006286		355	-0.7055	-0.0007055	355	-0.6454	-0.0006454	355	-0.6378	-0.0006378	355	-0.6271
	355.5	-0.7054	-0.0007054	355.5	-0.6488	-0.0006488	355.5	-0.64	-0.00064	355.5	-0.6172	-0.0006172	355.5	-0.6161	-0.0006161	355.5	-0.5994	-0.0005994		355.5	-0.7054	-0.0007054	355.5	-0.6561	-0.0006561	355.5	-0.6442	-0.0006442	355.5	-0.6368	-0.0006368	355.5	-0.6325	-0.0006325	355.5	-0.6286	-0.0006286		355.5	-0.7054	-0.0007054	355.5	-0.6454	-0.0006454	355.5	-0.6378	-0.0006378	355.5	-0.6271
	356	-0.7054	-0.0007054	356	-0.6488	-0.0006488	356	-0.6401	-0.0006401	356	-0.6172	-0.0006172	356	-0.6161	-0.0006161	356	-0.5995	-0.0005995		356	-0.7054	-0.0007054	356	-0.6561	-0.0006561	356	-0.6442	-0.0006442	356	-0.6368	-0.0006368	356	-0.6325	-0.0006325	356	-0.6286	-0.0006286		356	-0.7054	-0.0007054	356	-0.6454	-0.0006454	356	-0.6378	-0.0006378	356	-0.6271
	356.5	-0.7054	-0.0007054	356.5	-0.6488	-0.0006488	356.5	-0.6401	-0.0006401	356.5	-0.6172	-0.0006172	356.5	-0.6162	-0.0006162	356.5	-0.5995	-0.0005995		356.5	-0.7054	-0.0007054	356.5	-0.6561	-0.0006561	356.5	-0.6442	-0.0006442	356.5	-0.6368	-0.0006368	356.5	-0.6325	-0.0006325	356.5	-0.6286	-0.0006286		356.5	-0.7054	-0.0007054	356.5	-0.6454	-0.0006454	356.5	-0.6378	-0.0006378	356.5	-0.6271
	357	-0.7053	-0.0007053	357	-0.6488	-0.0006488	357	-0.6401	-0.0006401	357	-0.6173	-0.0006173	357	-0.6162	-0.0006162	357	-0.5995	-0.0005995		357	-0.7053	-0.0007053	357	-0.6561	-0.0006561	357	-0.6442	-0.0006442	357	-0.6368	-0.0006368	357	-0.6325	-0.0006325	357	-0.6287	-0.0006287		357	-0.7053	-0.0007053	357	-0.6455	-0.0006455	357	-0.6378	-0.0006378	357	-0.6271
	357.5	-0.7053	-0.0007053	357.5	-0.6488	-0.0006488	357.5	-0.6401	-0.0006401	357.5	-0.6173	-0.0006173	357.5	-0.6162	-0.0006162	357.5	-0.5995	-0.0005995		357.5	-0.7053	-0.0007053	357.5	-0.6561	-0.0006561	357.5	-0.6442	-0.0006442	357.5	-0.6368	-0.0006368	357.5	-0.6325	-0.0006325	357.5	-0.6287	-0.0006287		357.5	-0.7053	-0.0007053	357.5	-0.6455	-0.0006455	357.5	-0.6378	-0.0006378	357.5	-0.6271
	358	-0.7053	-0.0007053	358	-0.6488	-0.0006488	358	-0.6401	-0.0006401	358	-0.6173	-0.0006173	358	-0.6162	-0.0006162	358	-0.5995	-0.0005995		358	-0.7053	-0.0007053	358	-0.6561	-0.0006561	358	-0.6442	-0.0006442	358	-0.6368	-0.0006368	358	-0.6325	-0.0006325	358	-0.6287	-0.0006287		358	-0.7053	-0.0007053	358	-0.6455	-0.0006455	358	-0.6378	-0.0006378	358	-0.6271
	358.5	-0.7053	-0.0007053	358.5	-0.6488	-0.0006488	358.5	-0.6401	-0.0006401	358.5	-0.6174	-0.0006174	358.5	-0.6163	-0.0006163	358.5	-0.5996	-0.0005996		358.5	-0.7053	-0.0007053	358.5	-0.656	-0.000656	358.5	-0.6442	-0.0006442	358.5	-0.6368	-0.0006368	358.5	-0.6325	-0.0006325	358.5	-0.6287	-0.0006287		358.5	-0.7053	-0.0007053	358.5	-0.6455	-0.0006455	358.5	-0.6378	-0.0006378	358.5	-0.6271
	359	-0.7053	-0.0007053	359	-0.6488	-0.0006488	359	-0.6401	-0.0006401	359	-0.6174	-0.0006174	359	-0.6163	-0.0006163	359	-0.5996	-0.0005996		359	-0.7053	-0.0007053	359	-0.656	-0.000656	359	-0.6442	-0.0006442	359	-0.6368	-0.0006368	359	-0.6325	-0.0006325	359	-0.6287	-0.0006287		359	-0.7053	-0.0007053	359	-0.6455	-0.0006455	359	-0.6378	-0.0006378	359	-0.6271
	359.5	-0.7053	-0.0007053	359.5	-0.6488	-0.0006488	359.5	-0.6401	-0.0006401	359.5	-0.6174	-0.0006174	359.5	-0.6163	-0.0006163	359.5	-0.5996	-0.0005996		359.5	-0.7053	-0.0007053	359.5	-0.656	-0.000656	359.5	-0.6442	-0.0006442	359.5	-0.6368	-0.0006368	359.5	-0.6325	-0.0006325	359.5	-0.6287	-0.0006287		359.5	-0.7053	-0.0007053	359.5	-0.6455	-0.0006455	359.5	-0.6378	-0.0006378	359.5	-0.6271
	360.1	-0.7053	-0.0007053	360.1	-0.6488	-0.0006488	360.1	-0.6401	-0.0006401	360.1	-0.6174	-0.0006174	360.1	-0.6163	-0.0006163	360.1	-0.5996	-0.0005996		360.1	-0.7053	-0.0007053	360.1	-0.656	-0.000656	360.1	-0.6442	-0.0006442	360.1	-0.6368	-0.0006368	360.1	-0.6325	-0.0006325	360.1	-0.6286	-0.0006286		360.1	-0.7053	-0.0007053	360.1	-0.6455	-0.0006455	360.1	-0.6378	-0.0006378	360.1	-0.6271
	360.6	-0.7053	-0.0007053	360.6	-0.6488	-0.0006488	360.6	-0.6401	-0.0006401	360.6	-0.6174	-0.0006174	360.6	-0.6164	-0.0006164	360.6	-0.5996	-0.0005996		360.6	-0.7053	-0.0007053	360.6	-0.656	-0.000656	360.6	-0.6442	-0.0006442	360.6	-0.6368	-0.0006368	360.6	-0.6325	-0.0006325	360.6	-0.6286	-0.0006286		360.6	-0.7053	-0.0007053	360.6	-0.6455	-0.0006455	360.6	-0.6378	-0.0006378	360.6	-0.627
	361.1	-0.7053	-0.0007053	361.1	-0.6488	-0.0006488	361.1	-0.6401	-0.0006401	361.1	-0.6175	-0.0006175	361.1	-0.6164	-0.0006164	361.1	-0.5997	-0.0005997		361.1	-0.7053	-0.0007053	361.1	-0.656	-0.000656	361.1	-0.6442	-0.0006442	361.1	-0.6368	-0.0006368	361.1	-0.6325	-0.0006325	361.1	-0.6286	-0.0006286		361.1	-0.7053	-0.0007053	361.1	-0.6455	-0.0006455	361.1	-0.6378	-0.0006378	361.1	-0.627
	361.6	-0.7053	-0.0007053	361.6	-0.6489	-0.0006489	361.6	-0.6401	-0.0006401	361.6	-0.6175	-0.0006175	361.6	-0.6164	-0.0006164	361.6	-0.5997	-0.0005997		361.6	-0.7053	-0.0007053	361.6	-0.6559	-0.0006559	361.6	-0.6442	-0.0006442	361.6	-0.6368	-0.0006368	361.6	-0.6325	-0.0006325	361.6	-0.6286	-0.0006286		361.6	-0.7053	-0.0007053	361.6	-0.6455	-0.0006455	361.6	-0.6378	-0.0006378	361.6	-0.627
	362.1	-0.7053	-0.0007053	362.1	-0.6489	-0.0006489	362.1	-0.6401	-0.0006401	362.1	-0.6175	-0.0006175	362.1	-0.6164	-0.0006164	362.1	-0.5997	-0.0005997		362.1	-0.7053	-0.0007053	362.1	-0.6559	-0.0006559	362.1	-0.6442	-0.0006442	362.1	-0.6368	-0.0006368	362.1	-0.6325	-0.0006325	362.1	-0.6286	-0.0006286		362.1	-0.7053	-0.0007053	362.1	-0.6455	-0.0006455	362.1	-0.6378	-0.0006378	362.1	-0.627
	362.6	-0.7053	-0.0007053	362.6	-0.6489	-0.0006489	362.6	-0.6401	-0.0006401	362.6	-0.6175	-0.0006175	362.6	-0.6164	-0.0006164	362.6	-0.5997	-0.0005997		362.6	-0.7053	-0.0007053	362.6	-0.6559	-0.0006559	362.6	-0.6442	-0.0006442	362.6	-0.6368	-0.0006368	362.6	-0.6325	-0.0006325	362.6	-0.6286	-0.0006286		362.6	-0.7053	-0.0007053	362.6	-0.6455	-0.0006455	362.6	-0.6378	-0.0006378	362.6	-0.627
	363.1	-0.7052	-0.0007052	363.1	-0.6489	-0.0006489	363.1	-0.6401	-0.0006401	363.1	-0.6175	-0.0006175	363.1	-0.6165	-0.0006165	363.1	-0.5997	-0.0005997		363.1	-0.7052	-0.0007052	363.1	-0.6559	-0.0006559	363.1	-0.6442	-0.0006442	363.1	-0.6368	-0.0006368	363.1	-0.6325	-0.0006325	363.1	-0.6287	-0.0006287		363.1	-0.7052	-0.0007052	363.1	-0.6455	-0.0006455	363.1	-0.6378	-0.0006378	363.1	-0.627
	363.6	-0.7052	-0.0007052	363.6	-0.6489	-0.0006489	363.6	-0.6401	-0.0006401	363.6	-0.6175	-0.0006175	363.6	-0.6165	-0.0006165	363.6	-0.5998	-0.0005998		363.6	-0.7052	-0.0007052	363.6	-0.6559	-0.0006559	363.6	-0.6442	-0.0006442	363.6	-0.6367	-0.0006367	363.6	-0.6325	-0.0006325	363.6	-0.6287	-0.0006287		363.6	-0.7052	-0.0007052	363.6	-0.6456	-0.0006456	363.6	-0.6378	-0.0006378	363.6	-0.627
	364.1	-0.7052	-0.0007052	364.1	-0.6489	-0.0006489	364.1	-0.6401	-0.0006401	364.1	-0.6175	-0.0006175	364.1	-0.6165	-0.0006165	364.1	-0.5998	-0.0005998		364.1	-0.7052	-0.0007052	364.1	-0.6559	-0.0006559	364.1	-0.6442	-0.0006442	364.1	-0.6367	-0.0006367	364.1	-0.6325	-0.0006325	364.1	-0.6286	-0.0006286		364.1	-0.7052	-0.0007052	364.1	-0.6456	-0.0006456	364.1	-0.6378	-0.0006378	364.1	-0.6269
	364.6	-0.7052	-0.0007052	364.6	-0.6489	-0.0006489	364.6	-0.6401	-0.0006401	364.6	-0.6175	-0.0006175	364.6	-0.6165	-0.0006165	364.6	-0.5998	-0.0005998		364.6	-0.7052	-0.0007052	364.6	-0.6559	-0.0006559	364.6	-0.6442	-0.0006442	364.6	-0.6367	-0.0006367	364.6	-0.6325	-0.0006325	364.6	-0.6286	-0.0006286		364.6	-0.7052	-0.0007052	364.6	-0.6456	-0.0006456	364.6	-0.6378	-0.0006378	364.6	-0.6269
	365.2	-0.7052	-0.0007052	365.2	-0.6489	-0.0006489	365.2	-0.6401	-0.0006401	365.2	-0.6175	-0.0006175	365.2	-0.6166	-0.0006166	365.2	-0.5998	-0.0005998		365.2	-0.7052	-0.0007052	365.2	-0.6559	-0.0006559	365.2	-0.6442	-0.0006442	365.2	-0.6368	-0.0006368	365.2	-0.6325	-0.0006325	365.2	-0.6286	-0.0006286		365.2	-0.7052	-0.0007052	365.2	-0.6456	-0.0006456	365.2	-0.6378	-0.0006378	365.2	-0.6269
	365.7	-0.7052	-0.0007052	365.7	-0.6489	-0.0006489	365.7	-0.6401	-0.0006401	365.7	-0.6176	-0.0006176	365.7	-0.6166	-0.0006166	365.7	-0.5998	-0.0005998		365.7	-0.7052	-0.0007052	365.7	-0.6559	-0.0006559	365.7	-0.6442	-0.0006442	365.7	-0.6367	-0.0006367	365.7	-0.6325	-0.0006325	365.7	-0.6286	-0.0006286		365.7	-0.7052	-0.0007052	365.7	-0.6457	-0.0006457	365.7	-0.6378	-0.0006378	365.7	-0.6269
	366.2	-0.7052	-0.0007052	366.2	-0.6489	-0.0006489	366.2	-0.6401	-0.0006401	366.2	-0.6176	-0.0006176	366.2	-0.6166	-0.0006166	366.2	-0.5999	-0.0005999		366.2	-0.7052	-0.0007052	366.2	-0.6559	-0.0006559	366.2	-0.6442	-0.0006442	366.2	-0.6367	-0.0006367	366.2	-0.6324	-0.0006324	366.2	-0.6286	-0.0006286		366.2	-0.7052	-0.0007052	366.2	-0.6457	-0.0006457	366.2	-0.6377	-0.0006377	366.2	-0.6269
	366.7	-0.7052	-0.0007052	366.7	-0.6489	-0.0006489	366.7	-0.6401	-0.0006401	366.7	-0.6177	-0.0006177	366.7	-0.6166	-0.0006166	366.7	-0.5999	-0.0005999		366.7	-0.7052	-0.0007052	366.7	-0.6559	-0.0006559	366.7	-0.6442	-0.0006442	366.7	-0.6367	-0.0006367	366.7	-0.6324	-0.0006324	366.7	-0.6286	-0.0006286		366.7	-0.7052	-0.0007052	366.7	-0.6457	-0.0006457	366.7	-0.6377	-0.0006377	366.7	-0.6269
	367.2	-0.7051	-0.0007051	367.2	-0.6489	-0.0006489	367.2	-0.6401	-0.0006401	367.2	-0.6177	-0.0006177	367.2	-0.6167	-0.0006167	367.2	-0.5999	-0.0005999		367.2	-0.7051	-0.0007051	367.2	-0.6559	-0.0006559	367.2	-0.6442	-0.0006442	367.2	-0.6367	-0.0006367	367.2	-0.6324	-0.0006324	367.2	-0.6286	-0.0006286		367.2	-0.7051	-0.0007051	367.2	-0.6457	-0.0006457	367.2	-0.6377	-0.0006377	367.2	-0.6269
	367.7	-0.7051	-0.0007051	367.7	-0.6489	-0.0006489	367.7	-0.6401	-0.0006401	367.7	-0.6177	-0.0006177	367.7	-0.6167	-0.0006167	367.7	-0.5999	-0.0005999		367.7	-0.7051	-0.0007051	367.7	-0.6559	-0.0006559	367.7	-0.6441	-0.0006441	367.7	-0.6367	-0.0006367	367.7	-0.6324	-0.0006324	367.7	-0.6286	-0.0006286		367.7	-0.7051	-0.0007051	367.7	-0.6457	-0.0006457	367.7	-0.6377	-0.0006377	367.7	-0.6269
	368.2	-0.7051	-0.0007051	368.2	-0.6489	-0.0006489	368.2	-0.6401	-0.0006401	368.2	-0.6178	-0.0006178	368.2	-0.6167	-0.0006167	368.2	-0.5999	-0.0005999		368.2	-0.7051	-0.0007051	368.2	-0.6559	-0.0006559	368.2	-0.6441	-0.0006441	368.2	-0.6367	-0.0006367	368.2	-0.6324	-0.0006324	368.2	-0.6286	-0.0006286		368.2	-0.7051	-0.0007051	368.2	-0.6457	-0.0006457	368.2	-0.6377	-0.0006377	368.2	-0.6269
	368.7	-0.7051	-0.0007051	368.7	-0.6489	-0.0006489	368.7	-0.6401	-0.0006401	368.7	-0.6178	-0.0006178	368.7	-0.6167	-0.0006167	368.7	-0.6	-0.0006		368.7	-0.7051	-0.0007051	368.7	-0.6559	-0.0006559	368.7	-0.6441	-0.0006441	368.7	-0.6367	-0.0006367	368.7	-0.6324	-0.0006324	368.7	-0.6286	-0.0006286		368.7	-0.7051	-0.0007051	368.7	-0.6457	-0.0006457	368.7	-0.6377	-0.0006377	368.7	-0.6268
	369.2	-0.7051	-0.0007051	369.2	-0.6489	-0.0006489	369.2	-0.6401	-0.0006401	369.2	-0.6178	-0.0006178	369.2	-0.6167	-0.0006167	369.2	-0.6	-0.0006		369.2	-0.7051	-0.0007051	369.2	-0.6558	-0.0006558	369.2	-0.6441	-0.0006441	369.2	-0.6367	-0.0006367	369.2	-0.6324	-0.0006324	369.2	-0.6286	-0.0006286		369.2	-0.7051	-0.0007051	369.2	-0.6457	-0.0006457	369.2	-0.6377	-0.0006377	369.2	-0.6268
	369.8	-0.705	-0.000705	369.8	-0.6489	-0.0006489	369.8	-0.6401	-0.0006401	369.8	-0.6178	-0.0006178	369.8	-0.6168	-0.0006168	369.8	-0.6	-0.0006		369.8	-0.705	-0.000705	369.8	-0.6558	-0.0006558	369.8	-0.6441	-0.0006441	369.8	-0.6367	-0.0006367	369.8	-0.6324	-0.0006324	369.8	-0.6286	-0.0006286		369.8	-0.705	-0.000705	369.8	-0.6457	-0.0006457	369.8	-0.6377	-0.0006377	369.8	-0.6268
	370.3	-0.705	-0.000705	370.3	-0.6489	-0.0006489	370.3	-0.6401	-0.0006401	370.3	-0.6177	-0.0006177	370.3	-0.6168	-0.0006168	370.3	-0.6	-0.0006		370.3	-0.705	-0.000705	370.3	-0.6558	-0.0006558	370.3	-0.6441	-0.0006441	370.3	-0.6367	-0.0006367	370.3	-0.6324	-0.0006324	370.3	-0.6286	-0.0006286		370.3	-0.705	-0.000705	370.3	-0.6457	-0.0006457	370.3	-0.6377	-0.0006377	370.3	-0.6268
	370.8	-0.705	-0.000705	370.8	-0.6489	-0.0006489	370.8	-0.6401	-0.0006401	370.8	-0.6177	-0.0006177	370.8	-0.6168	-0.0006168	370.8	-0.6	-0.0006		370.8	-0.705	-0.000705	370.8	-0.6558	-0.0006558	370.8	-0.6441	-0.0006441	370.8	-0.6367	-0.0006367	370.8	-0.6324	-0.0006324	370.8	-0.6287	-0.0006287		370.8	-0.705	-0.000705	370.8	-0.6457	-0.0006457	370.8	-0.6377	-0.0006377	370.8	-0.6268
	371.3	-0.7049	-0.0007049	371.3	-0.6489	-0.0006489	371.3	-0.6401	-0.0006401	371.3	-0.6178	-0.0006178	371.3	-0.6168	-0.0006168	371.3	-0.6001	-0.0006001		371.3	-0.7049	-0.0007049	371.3	-0.6558	-0.0006558	371.3	-0.6441	-0.0006441	371.3	-0.6367	-0.0006367	371.3	-0.6324	-0.0006324	371.3	-0.6287	-0.0006287		371.3	-0.7049	-0.0007049	371.3	-0.6458	-0.0006458	371.3	-0.6377	-0.0006377	371.3	-0.6268
	371.8	-0.7049	-0.0007049	371.8	-0.6489	-0.0006489	371.8	-0.6402	-0.0006402	371.8	-0.6178	-0.0006178	371.8	-0.6169	-0.0006169	371.8	-0.6001	-0.0006001		371.8	-0.7049	-0.0007049	371.8	-0.6558	-0.0006558	371.8	-0.6441	-0.0006441	371.8	-0.6367	-0.0006367	371.8	-0.6324	-0.0006324	371.8	-0.6287	-0.0006287		371.8	-0.7049	-0.0007049	371.8	-0.6457	-0.0006457	371.8	-0.6377	-0.0006377	371.8	-0.6268
	372.3	-0.7049	-0.0007049	372.3	-0.6489	-0.0006489	372.3	-0.6402	-0.0006402	372.3	-0.6178	-0.0006178	372.3	-0.6169	-0.0006169	372.3	-0.6001	-0.0006001		372.3	-0.7049	-0.0007049	372.3	-0.6558	-0.0006558	372.3	-0.6441	-0.0006441	372.3	-0.6367	-0.0006367	372.3	-0.6324	-0.0006324	372.3	-0.6287	-0.0006287		372.3	-0.7049	-0.0007049	372.3	-0.6458	-0.0006458	372.3	-0.6377	-0.0006377	372.3	-0.6268
	372.8	-0.7048	-0.0007048	372.8	-0.6489	-0.0006489	372.8	-0.6402	-0.0006402	372.8	-0.6178	-0.0006178	372.8	-0.6169	-0.0006169	372.8	-0.6001	-0.0006001		372.8	-0.7048	-0.0007048	372.8	-0.6558	-0.0006558	372.8	-0.6441	-0.0006441	372.8	-0.6367	-0.0006367	372.8	-0.6324	-0.0006324	372.8	-0.6287	-0.0006287		372.8	-0.7048	-0.0007048	372.8	-0.6458	-0.0006458	372.8	-0.6377	-0.0006377	372.8	-0.6268
	373.3	-0.7048	-0.0007048	373.3	-0.6489	-0.0006489	373.3	-0.6402	-0.0006402	373.3	-0.6178	-0.0006178	373.3	-0.6169	-0.0006169	373.3	-0.6002	-0.0006002		373.3	-0.7048	-0.0007048	373.3	-0.6558	-0.0006558	373.3	-0.6441	-0.0006441	373.3	-0.6367	-0.0006367	373.3	-0.6324	-0.0006324	373.3	-0.6287	-0.0006287		373.3	-0.7048	-0.0007048	373.3	-0.6458	-0.0006458	373.3	-0.6377	-0.0006377	373.3	-0.6267
	373.8	-0.7048	-0.0007048	373.8	-0.6489	-0.0006489	373.8	-0.6402	-0.0006402	373.8	-0.6178	-0.0006178	373.8	-0.6169	-0.0006169	373.8	-0.6002	-0.0006002		373.8	-0.7048	-0.0007048	373.8	-0.6557	-0.0006557	373.8	-0.6441	-0.0006441	373.8	-0.6367	-0.0006367	373.8	-0.6324	-0.0006324	373.8	-0.6287	-0.0006287		373.8	-0.7048	-0.0007048	373.8	-0.6458	-0.0006458	373.8	-0.6377	-0.0006377	373.8	-0.6267
	374.3	-0.7047	-0.0007047	374.3	-0.6489	-0.0006489	374.3	-0.6402	-0.0006402	374.3	-0.6178	-0.0006178	374.3	-0.617	-0.000617	374.3	-0.6002	-0.0006002		374.3	-0.7047	-0.0007047	374.3	-0.6557	-0.0006557	374.3	-0.6441	-0.0006441	374.3	-0.6367	-0.0006367	374.3	-0.6324	-0.0006324	374.3	-0.6287	-0.0006287		374.3	-0.7047	-0.0007047	374.3	-0.6459	-0.0006459	374.3	-0.6377	-0.0006377	374.3	-0.6267
	374.9	-0.7047	-0.0007047	374.9	-0.6489	-0.0006489	374.9	-0.6402	-0.0006402	374.9	-0.6178	-0.0006178	374.9	-0.617	-0.000617	374.9	-0.6002	-0.0006002		374.9	-0.7047	-0.0007047	374.9	-0.6557	-0.0006557	374.9	-0.6441	-0.0006441	374.9	-0.6367	-0.0006367	374.9	-0.6324	-0.0006324	374.9	-0.6287	-0.0006287		374.9	-0.7047	-0.0007047	374.9	-0.6459	-0.0006459	374.9	-0.6377	-0.0006377	374.9	-0.6267
	375.4	-0.7046	-0.0007046	375.4	-0.6489	-0.0006489	375.4	-0.6402	-0.0006402	375.4	-0.6179	-0.0006179	375.4	-0.617	-0.000617	375.4	-0.6002	-0.0006002		375.4	-0.7046	-0.0007046	375.4	-0.6557	-0.0006557	375.4	-0.6441	-0.0006441	375.4	-0.6367	-0.0006367	375.4	-0.6324	-0.0006324	375.4	-0.6287	-0.0006287		375.4	-0.7046	-0.0007046	375.4	-0.6459	-0.0006459	375.4	-0.6377	-0.0006377	375.4	-0.6267
	375.9	-0.7046	-0.0007046	375.9	-0.6489	-0.0006489	375.9	-0.6402	-0.0006402	375.9	-0.618	-0.000618	375.9	-0.617	-0.000617	375.9	-0.6002	-0.0006002		375.9	-0.7046	-0.0007046	375.9	-0.6557	-0.0006557	375.9	-0.6441	-0.0006441	375.9	-0.6367	-0.0006367	375.9	-0.6324	-0.0006324	375.9	-0.6287	-0.0006287		375.9	-0.7046	-0.0007046	375.9	-0.6459	-0.0006459	375.9	-0.6377	-0.0006377	375.9	-0.6267
	376.4	-0.7046	-0.0007046	376.4	-0.6489	-0.0006489	376.4	-0.6402	-0.0006402	376.4	-0.618	-0.000618	376.4	-0.6171	-0.0006171	376.4	-0.6003	-0.0006003		376.4	-0.7046	-0.0007046	376.4	-0.6557	-0.0006557	376.4	-0.6441	-0.0006441	376.4	-0.6367	-0.0006367	376.4	-0.6324	-0.0006324	376.4	-0.6287	-0.0006287		376.4	-0.7046	-0.0007046	376.4	-0.6459	-0.0006459	376.4	-0.6377	-0.0006377	376.4	-0.6267
	376.9	-0.7045	-0.0007045	376.9	-0.6489	-0.0006489	376.9	-0.6402	-0.0006402	376.9	-0.618	-0.000618	376.9	-0.6171	-0.0006171	376.9	-0.6003	-0.0006003		376.9	-0.7045	-0.0007045	376.9	-0.6557	-0.0006557	376.9	-0.6441	-0.0006441	376.9	-0.6367	-0.0006367	376.9	-0.6324	-0.0006324	376.9	-0.6287	-0.0006287		376.9	-0.7045	-0.0007045	376.9	-0.6459	-0.0006459	376.9	-0.6377	-0.0006377	376.9	-0.6267
	377.4	-0.7045	-0.0007045	377.4	-0.6489	-0.0006489	377.4	-0.6402	-0.0006402	377.4	-0.6181	-0.0006181	377.4	-0.6171	-0.0006171	377.4	-0.6003	-0.0006003		377.4	-0.7045	-0.0007045	377.4	-0.6557	-0.0006557	377.4	-0.6441	-0.0006441	377.4	-0.6367	-0.0006367	377.4	-0.6324	-0.0006324	377.4	-0.6287	-0.0006287		377.4	-0.7045	-0.0007045	377.4	-0.6459	-0.0006459	377.4	-0.6377	-0.0006377	377.4	-0.6267
	377.9	-0.7045	-0.0007045	377.9	-0.6489	-0.0006489	377.9	-0.6402	-0.0006402	377.9	-0.6181	-0.0006181	377.9	-0.6171	-0.0006171	377.9	-0.6003	-0.0006003		377.9	-0.7045	-0.0007045	377.9	-0.6557	-0.0006557	377.9	-0.6441	-0.0006441	377.9	-0.6366	-0.0006366	377.9	-0.6324	-0.0006324	377.9	-0.6287	-0.0006287		377.9	-0.7045	-0.0007045	377.9	-0.6459	-0.0006459	377.9	-0.6377	-0.0006377	377.9	-0.6266
	378.4	-0.7044	-0.0007044	378.4	-0.6489	-0.0006489	378.4	-0.6402	-0.0006402	378.4	-0.6181	-0.0006181	378.4	-0.6172	-0.0006172	378.4	-0.6003	-0.0006003		378.4	-0.7044	-0.0007044	378.4	-0.6556	-0.0006556	378.4	-0.6441	-0.0006441	378.4	-0.6366	-0.0006366	378.4	-0.6324	-0.0006324	378.4	-0.6287	-0.0006287		378.4	-0.7044	-0.0007044	378.4	-0.6459	-0.0006459	378.4	-0.6377	-0.0006377	378.4	-0.6266
	378.9	-0.7044	-0.0007044	378.9	-0.6489	-0.0006489	378.9	-0.6402	-0.0006402	378.9	-0.6181	-0.0006181	378.9	-0.6172	-0.0006172	378.9	-0.6004	-0.0006004		378.9	-0.7044	-0.0007044	378.9	-0.6556	-0.0006556	378.9	-0.6441	-0.0006441	378.9	-0.6366	-0.0006366	378.9	-0.6323	-0.0006323	378.9	-0.6287	-0.0006287		378.9	-0.7044	-0.0007044	378.9	-0.6459	-0.0006459	378.9	-0.6377	-0.0006377	378.9	-0.6266
	379.4	-0.7044	-0.0007044	379.4	-0.6489	-0.0006489	379.4	-0.6402	-0.0006402	379.4	-0.6181	-0.0006181	379.4	-0.6172	-0.0006172	379.4	-0.6004	-0.0006004		379.4	-0.7044	-0.0007044	379.4	-0.6556	-0.0006556	379.4	-0.6441	-0.0006441	379.4	-0.6366	-0.0006366	379.4	-0.6323	-0.0006323	379.4	-0.6287	-0.0006287		379.4	-0.7044	-0.0007044	379.4	-0.6459	-0.0006459	379.4	-0.6377	-0.0006377	379.4	-0.6266
	380	-0.7043	-0.0007043	380	-0.6489	-0.0006489	380	-0.6402	-0.0006402	380	-0.6181	-0.0006181	380	-0.6172	-0.0006172	380	-0.6004	-0.0006004		380	-0.7043	-0.0007043	380	-0.6556	-0.0006556	380	-0.6441	-0.0006441	380	-0.6366	-0.0006366	380	-0.6323	-0.0006323	380	-0.6287	-0.0006287		380	-0.7043	-0.0007043	380	-0.6459	-0.0006459	380	-0.6377	-0.0006377	380	-0.6266
	380.5	-0.7043	-0.0007043	380.5	-0.649	-0.000649	380.5	-0.6402	-0.0006402	380.5	-0.6182	-0.0006182	380.5	-0.6172	-0.0006172	380.5	-0.6004	-0.0006004		380.5	-0.7043	-0.0007043	380.5	-0.6556	-0.0006556	380.5	-0.6441	-0.0006441	380.5	-0.6366	-0.0006366	380.5	-0.6323	-0.0006323	380.5	-0.6287	-0.0006287		380.5	-0.7043	-0.0007043	380.5	-0.646	-0.000646	380.5	-0.6377	-0.0006377	380.5	-0.6266
	381	-0.7043	-0.0007043	381	-0.649	-0.000649	381	-0.6402	-0.0006402	381	-0.6182	-0.0006182	381	-0.6173	-0.0006173	381	-0.6004	-0.0006004		381	-0.7043	-0.0007043	381	-0.6556	-0.0006556	381	-0.6441	-0.0006441	381	-0.6366	-0.0006366	381	-0.6323	-0.0006323	381	-0.6287	-0.0006287		381	-0.7043	-0.0007043	381	-0.646	-0.000646	381	-0.6377	-0.0006377	381	-0.6266
	381.5	-0.7042	-0.0007042	381.5	-0.649	-0.000649	381.5	-0.6402	-0.0006402	381.5	-0.6182	-0.0006182	381.5	-0.6173	-0.0006173	381.5	-0.6004	-0.0006004		381.5	-0.7042	-0.0007042	381.5	-0.6556	-0.0006556	381.5	-0.6441	-0.0006441	381.5	-0.6366	-0.0006366	381.5	-0.6323	-0.0006323	381.5	-0.6287	-0.0006287		381.5	-0.7042	-0.0007042	381.5	-0.646	-0.000646	381.5	-0.6377	-0.0006377	381.5	-0.6266
	382	-0.7042	-0.0007042	382	-0.649	-0.000649	382	-0.6402	-0.0006402	382	-0.6182	-0.0006182	382	-0.6173	-0.0006173	382	-0.6005	-0.0006005		382	-0.7042	-0.0007042	382	-0.6556	-0.0006556	382	-0.6441	-0.0006441	382	-0.6366	-0.0006366	382	-0.6323	-0.0006323	382	-0.6287	-0.0006287		382	-0.7042	-0.0007042	382	-0.646	-0.000646	382	-0.6377	-0.0006377	382	-0.6265
	382.5	-0.7042	-0.0007042	382.5	-0.649	-0.000649	382.5	-0.6402	-0.0006402	382.5	-0.6182	-0.0006182	382.5	-0.6173	-0.0006173	382.5	-0.6005	-0.0006005		382.5	-0.7042	-0.0007042	382.5	-0.6556	-0.0006556	382.5	-0.6441	-0.0006441	382.5	-0.6366	-0.0006366	382.5	-0.6323	-0.0006323	382.5	-0.6287	-0.0006287		382.5	-0.7042	-0.0007042	382.5	-0.646	-0.000646	382.5	-0.6377	-0.0006377	382.5	-0.6265
	383	-0.7042	-0.0007042	383	-0.649	-0.000649	383	-0.6402	-0.0006402	383	-0.6182	-0.0006182	383	-0.6173	-0.0006173	383	-0.6005	-0.0006005		383	-0.7042	-0.0007042	383	-0.6555	-0.0006555	383	-0.6441	-0.0006441	383	-0.6366	-0.0006366	383	-0.6323	-0.0006323	383	-0.6287	-0.0006287		383	-0.7042	-0.0007042	383	-0.646	-0.000646	383	-0.6377	-0.0006377	383	-0.6265
	383.5	-0.7041	-0.0007041	383.5	-0.649	-0.000649	383.5	-0.6402	-0.0006402	383.5	-0.6182	-0.0006182	383.5	-0.6174	-0.0006174	383.5	-0.6005	-0.0006005		383.5	-0.7041	-0.0007041	383.5	-0.6555	-0.0006555	383.5	-0.6441	-0.0006441	383.5	-0.6366	-0.0006366	383.5	-0.6323	-0.0006323	383.5	-0.6287	-0.0006287		383.5	-0.7041	-0.0007041	383.5	-0.646	-0.000646	383.5	-0.6377	-0.0006377	383.5	-0.6265
	384	-0.7041	-0.0007041	384	-0.649	-0.000649	384	-0.6402	-0.0006402	384	-0.6182	-0.0006182	384	-0.6174	-0.0006174	384	-0.6005	-0.0006005		384	-0.7041	-0.0007041	384	-0.6555	-0.0006555	384	-0.6441	-0.0006441	384	-0.6366	-0.0006366	384	-0.6323	-0.0006323	384	-0.6287	-0.0006287		384	-0.7041	-0.0007041	384	-0.646	-0.000646	384	-0.6377	-0.0006377	384	-0.6265
	384.5	-0.7041	-0.0007041	384.5	-0.649	-0.000649	384.5	-0.6402	-0.0006402	384.5	-0.6182	-0.0006182	384.5	-0.6174	-0.0006174	384.5	-0.6005	-0.0006005		384.5	-0.7041	-0.0007041	384.5	-0.6555	-0.0006555	384.5	-0.6441	-0.0006441	384.5	-0.6366	-0.0006366	384.5	-0.6323	-0.0006323	384.5	-0.6287	-0.0006287		384.5	-0.7041	-0.0007041	384.5	-0.646	-0.000646	384.5	-0.6377	-0.0006377	384.5	-0.6265
	385	-0.7041	-0.0007041	385	-0.649	-0.000649	385	-0.6402	-0.0006402	385	-0.6182	-0.0006182	385	-0.6174	-0.0006174	385	-0.6006	-0.0006006		385	-0.7041	-0.0007041	385	-0.6555	-0.0006555	385	-0.6441	-0.0006441	385	-0.6366	-0.0006366	385	-0.6323	-0.0006323	385	-0.6287	-0.0006287		385	-0.7041	-0.0007041	385	-0.646	-0.000646	385	-0.6377	-0.0006377	385	-0.6265
	385.6	-0.704	-0.000704	385.6	-0.649	-0.000649	385.6	-0.6403	-0.0006403	385.6	-0.6182	-0.0006182	385.6	-0.6175	-0.0006175	385.6	-0.6006	-0.0006006		385.6	-0.704	-0.000704	385.6	-0.6555	-0.0006555	385.6	-0.6441	-0.0006441	385.6	-0.6365	-0.0006365	385.6	-0.6323	-0.0006323	385.6	-0.6287	-0.0006287		385.6	-0.704	-0.000704	385.6	-0.646	-0.000646	385.6	-0.6377	-0.0006377	385.6	-0.6265
	386.1	-0.704	-0.000704	386.1	-0.649	-0.000649	386.1	-0.6403	-0.0006403	386.1	-0.6182	-0.0006182	386.1	-0.6175	-0.0006175	386.1	-0.6006	-0.0006006		386.1	-0.704	-0.000704	386.1	-0.6555	-0.0006555	386.1	-0.6441	-0.0006441	386.1	-0.6365	-0.0006365	386.1	-0.6323	-0.0006323	386.1	-0.6287	-0.0006287		386.1	-0.704	-0.000704	386.1	-0.646	-0.000646	386.1	-0.6377	-0.0006377	386.1	-0.6264
	386.6	-0.704	-0.000704	386.6	-0.649	-0.000649	386.6	-0.6403	-0.0006403	386.6	-0.6183	-0.0006183	386.6	-0.6175	-0.0006175	386.6	-0.6006	-0.0006006		386.6	-0.704	-0.000704	386.6	-0.6555	-0.0006555	386.6	-0.6441	-0.0006441	386.6	-0.6365	-0.0006365	386.6	-0.6323	-0.0006323	386.6	-0.6287	-0.0006287		386.6	-0.704	-0.000704	386.6	-0.646	-0.000646	386.6	-0.6377	-0.0006377	386.6	-0.6264
	387.1	-0.7039	-0.0007039	387.1	-0.649	-0.000649	387.1	-0.6403	-0.0006403	387.1	-0.6183	-0.0006183	387.1	-0.6175	-0.0006175	387.1	-0.6006	-0.0006006		387.1	-0.7039	-0.0007039	387.1	-0.6555	-0.0006555	387.1	-0.6441	-0.0006441	387.1	-0.6365	-0.0006365	387.1	-0.6323	-0.0006323	387.1	-0.6287	-0.0006287		387.1	-0.7039	-0.0007039	387.1	-0.646	-0.000646	387.1	-0.6377	-0.0006377	387.1	-0.6264
	387.6	-0.7039	-0.0007039	387.6	-0.649	-0.000649	387.6	-0.6403	-0.0006403	387.6	-0.6183	-0.0006183	387.6	-0.6176	-0.0006176	387.6	-0.6006	-0.0006006		387.6	-0.7039	-0.0007039	387.6	-0.6555	-0.0006555	387.6	-0.6441	-0.0006441	387.6	-0.6365	-0.0006365	387.6	-0.6323	-0.0006323	387.6	-0.6287	-0.0006287		387.6	-0.7039	-0.0007039	387.6	-0.646	-0.000646	387.6	-0.6377	-0.0006377	387.6	-0.6264
	388.1	-0.7039	-0.0007039	388.1	-0.649	-0.000649	388.1	-0.6403	-0.0006403	388.1	-0.6183	-0.0006183	388.1	-0.6176	-0.0006176	388.1	-0.6007	-0.0006007		388.1	-0.7039	-0.0007039	388.1	-0.6555	-0.0006555	388.1	-0.6441	-0.0006441	388.1	-0.6365	-0.0006365	388.1	-0.6323	-0.0006323	388.1	-0.6287	-0.0006287		388.1	-0.7039	-0.0007039	388.1	-0.6461	-0.0006461	388.1	-0.6377	-0.0006377	388.1	-0.6264
	388.6	-0.7038	-0.0007038	388.6	-0.649	-0.000649	388.6	-0.6403	-0.0006403	388.6	-0.6183	-0.0006183	388.6	-0.6176	-0.0006176	388.6	-0.6007	-0.0006007		388.6	-0.7038	-0.0007038	388.6	-0.6555	-0.0006555	388.6	-0.6441	-0.0006441	388.6	-0.6365	-0.0006365	388.6	-0.6323	-0.0006323	388.6	-0.6287	-0.0006287		388.6	-0.7038	-0.0007038	388.6	-0.6461	-0.0006461	388.6	-0.6377	-0.0006377	388.6	-0.6264
	389.1	-0.7038	-0.0007038	389.1	-0.649	-0.000649	389.1	-0.6403	-0.0006403	389.1	-0.6184	-0.0006184	389.1	-0.6176	-0.0006176	389.1	-0.6007	-0.0006007		389.1	-0.7038	-0.0007038	389.1	-0.6554	-0.0006554	389.1	-0.6441	-0.0006441	389.1	-0.6365	-0.0006365	389.1	-0.6323	-0.0006323	389.1	-0.6287	-0.0006287		389.1	-0.7038	-0.0007038	389.1	-0.6461	-0.0006461	389.1	-0.6377	-0.0006377	389.1	-0.6264
	389.6	-0.7037	-0.0007037	389.6	-0.649	-0.000649	389.6	-0.6403	-0.0006403	389.6	-0.6184	-0.0006184	389.6	-0.6176	-0.0006176	389.6	-0.6007	-0.0006007		389.6	-0.7037	-0.0007037	389.6	-0.6554	-0.0006554	389.6	-0.6441	-0.0006441	389.6	-0.6365	-0.0006365	389.6	-0.6323	-0.0006323	389.6	-0.6287	-0.0006287		389.6	-0.7037	-0.0007037	389.6	-0.6461	-0.0006461	389.6	-0.6377	-0.0006377	389.6	-0.6264
	390.1	-0.7037	-0.0007037	390.1	-0.6491	-0.0006491	390.1	-0.6403	-0.0006403	390.1	-0.6184	-0.0006184	390.1	-0.6177	-0.0006177	390.1	-0.6007	-0.0006007		390.1	-0.7037	-0.0007037	390.1	-0.6554	-0.0006554	390.1	-0.6441	-0.0006441	390.1	-0.6365	-0.0006365	390.1	-0.6323	-0.0006323	390.1	-0.6287	-0.0006287		390.1	-0.7037	-0.0007037	390.1	-0.6461	-0.0006461	390.1	-0.6377	-0.0006377	390.1	-0.6264
	390.7	-0.7037	-0.0007037	390.7	-0.6491	-0.0006491	390.7	-0.6403	-0.0006403	390.7	-0.6184	-0.0006184	390.7	-0.6177	-0.0006177	390.7	-0.6007	-0.0006007		390.7	-0.7037	-0.0007037	390.7	-0.6554	-0.0006554	390.7	-0.6441	-0.0006441	390.7	-0.6365	-0.0006365	390.7	-0.6323	-0.0006323	390.7	-0.6287	-0.0006287		390.7	-0.7037	-0.0007037	390.7	-0.6461	-0.0006461	390.7	-0.6377	-0.0006377	390.7	-0.6263
	391.2	-0.7037	-0.0007037	391.2	-0.6491	-0.0006491	391.2	-0.6403	-0.0006403	391.2	-0.6184	-0.0006184	391.2	-0.6177	-0.0006177	391.2	-0.6008	-0.0006008		391.2	-0.7037	-0.0007037	391.2	-0.6554	-0.0006554	391.2	-0.6441	-0.0006441	391.2	-0.6365	-0.0006365	391.2	-0.6323	-0.0006323	391.2	-0.6287	-0.0006287		391.2	-0.7037	-0.0007037	391.2	-0.6461	-0.0006461	391.2	-0.6377	-0.0006377	391.2	-0.6263
	391.7	-0.7036	-0.0007036	391.7	-0.6491	-0.0006491	391.7	-0.6403	-0.0006403	391.7	-0.6184	-0.0006184	391.7	-0.6177	-0.0006177	391.7	-0.6008	-0.0006008		391.7	-0.7036	-0.0007036	391.7	-0.6554	-0.0006554	391.7	-0.6441	-0.0006441	391.7	-0.6365	-0.0006365	391.7	-0.6323	-0.0006323	391.7	-0.6287	-0.0006287		391.7	-0.7036	-0.0007036	391.7	-0.6462	-0.0006462	391.7	-0.6377	-0.0006377	391.7	-0.6263
	392.2	-0.7036	-0.0007036	392.2	-0.6491	-0.0006491	392.2	-0.6403	-0.0006403	392.2	-0.6184	-0.0006184	392.2	-0.6178	-0.0006178	392.2	-0.6008	-0.0006008		392.2	-0.7036	-0.0007036	392.2	-0.6554	-0.0006554	392.2	-0.6441	-0.0006441	392.2	-0.6365	-0.0006365	392.2	-0.6323	-0.0006323	392.2	-0.6287	-0.0006287		392.2	-0.7036	-0.0007036	392.2	-0.6462	-0.0006462	392.2	-0.6377	-0.0006377	392.2	-0.6263
	392.7	-0.7036	-0.0007036	392.7	-0.6491	-0.0006491	392.7	-0.6403	-0.0006403	392.7	-0.6184	-0.0006184	392.7	-0.6178	-0.0006178	392.7	-0.6008	-0.0006008		392.7	-0.7036	-0.0007036	392.7	-0.6554	-0.0006554	392.7	-0.6441	-0.0006441	392.7	-0.6365	-0.0006365	392.7	-0.6323	-0.0006323	392.7	-0.6287	-0.0006287		392.7	-0.7036	-0.0007036	392.7	-0.6462	-0.0006462	392.7	-0.6377	-0.0006377	392.7	-0.6263
	393.2	-0.7035	-0.0007035	393.2	-0.6491	-0.0006491	393.2	-0.6403	-0.0006403	393.2	-0.6184	-0.0006184	393.2	-0.6178	-0.0006178	393.2	-0.6008	-0.0006008		393.2	-0.7035	-0.0007035	393.2	-0.6554	-0.0006554	393.2	-0.6441	-0.0006441	393.2	-0.6365	-0.0006365	393.2	-0.6323	-0.0006323	393.2	-0.6287	-0.0006287		393.2	-0.7035	-0.0007035	393.2	-0.6462	-0.0006462	393.2	-0.6377	-0.0006377	393.2	-0.6263
	393.7	-0.7035	-0.0007035	393.7	-0.6491	-0.0006491	393.7	-0.6403	-0.0006403	393.7	-0.6184	-0.0006184	393.7	-0.6178	-0.0006178	393.7	-0.6008	-0.0006008		393.7	-0.7035	-0.0007035	393.7	-0.6554	-0.0006554	393.7	-0.6441	-0.0006441	393.7	-0.6365	-0.0006365	393.7	-0.6322	-0.0006322	393.7	-0.6287	-0.0006287		393.7	-0.7035	-0.0007035	393.7	-0.6462	-0.0006462	393.7	-0.6377	-0.0006377	393.7	-0.6263
	394.2	-0.7034	-0.0007034	394.2	-0.6491	-0.0006491	394.2	-0.6403	-0.0006403	394.2	-0.6184	-0.0006184	394.2	-0.6178	-0.0006178	394.2	-0.6009	-0.0006009		394.2	-0.7034	-0.0007034	394.2	-0.6554	-0.0006554	394.2	-0.6441	-0.0006441	394.2	-0.6365	-0.0006365	394.2	-0.6322	-0.0006322	394.2	-0.6287	-0.0006287		394.2	-0.7034	-0.0007034	394.2	-0.6462	-0.0006462	394.2	-0.6377	-0.0006377	394.2	-0.6263
	394.7	-0.7034	-0.0007034	394.7	-0.6491	-0.0006491	394.7	-0.6403	-0.0006403	394.7	-0.6185	-0.0006185	394.7	-0.6179	-0.0006179	394.7	-0.6009	-0.0006009		394.7	-0.7034	-0.0007034	394.7	-0.6554	-0.0006554	394.7	-0.6441	-0.0006441	394.7	-0.6365	-0.0006365	394.7	-0.6322	-0.0006322	394.7	-0.6287	-0.0006287		394.7	-0.7034	-0.0007034	394.7	-0.6462	-0.0006462	394.7	-0.6377	-0.0006377	394.7	-0.6262
	395.3	-0.7034	-0.0007034	395.3	-0.6491	-0.0006491	395.3	-0.6403	-0.0006403	395.3	-0.6185	-0.0006185	395.3	-0.6179	-0.0006179	395.3	-0.6009	-0.0006009		395.3	-0.7034	-0.0007034	395.3	-0.6554	-0.0006554	395.3	-0.6441	-0.0006441	395.3	-0.6365	-0.0006365	395.3	-0.6322	-0.0006322	395.3	-0.6287	-0.0006287		395.3	-0.7034	-0.0007034	395.3	-0.6462	-0.0006462	395.3	-0.6377	-0.0006377	395.3	-0.6262
	395.8	-0.7033	-0.0007033	395.8	-0.6491	-0.0006491	395.8	-0.6403	-0.0006403	395.8	-0.6186	-0.0006186	395.8	-0.6179	-0.0006179	395.8	-0.6009	-0.0006009		395.8	-0.7033	-0.0007033	395.8	-0.6554	-0.0006554	395.8	-0.6441	-0.0006441	395.8	-0.6365	-0.0006365	395.8	-0.6322	-0.0006322	395.8	-0.6287	-0.0006287		395.8	-0.7033	-0.0007033	395.8	-0.6462	-0.0006462	395.8	-0.6377	-0.0006377	395.8	-0.6262
	396.3	-0.7033	-0.0007033	396.3	-0.6491	-0.0006491	396.3	-0.6403	-0.0006403	396.3	-0.6186	-0.0006186	396.3	-0.6179	-0.0006179	396.3	-0.6009	-0.0006009		396.3	-0.7033	-0.0007033	396.3	-0.6554	-0.0006554	396.3	-0.6441	-0.0006441	396.3	-0.6365	-0.0006365	396.3	-0.6322	-0.0006322	396.3	-0.6287	-0.0006287		396.3	-0.7033	-0.0007033	396.3	-0.6462	-0.0006462	396.3	-0.6377	-0.0006377	396.3	-0.6262
	396.8	-0.7033	-0.0007033	396.8	-0.6491	-0.0006491	396.8	-0.6403	-0.0006403	396.8	-0.6186	-0.0006186	396.8	-0.6179	-0.0006179	396.8	-0.6009	-0.0006009		396.8	-0.7033	-0.0007033	396.8	-0.6554	-0.0006554	396.8	-0.6441	-0.0006441	396.8	-0.6365	-0.0006365	396.8	-0.6322	-0.0006322	396.8	-0.6287	-0.0006287		396.8	-0.7033	-0.0007033	396.8	-0.6462	-0.0006462	396.8	-0.6377	-0.0006377	396.8	-0.6262
	397.3	-0.7032	-0.0007032	397.3	-0.6491	-0.0006491	397.3	-0.6403	-0.0006403	397.3	-0.6185	-0.0006185	397.3	-0.618	-0.000618	397.3	-0.601	-0.000601		397.3	-0.7032	-0.0007032	397.3	-0.6554	-0.0006554	397.3	-0.6441	-0.0006441	397.3	-0.6365	-0.0006365	397.3	-0.6322	-0.0006322	397.3	-0.6287	-0.0006287		397.3	-0.7032	-0.0007032	397.3	-0.6463	-0.0006463	397.3	-0.6377	-0.0006377	397.3	-0.6262
	397.8	-0.7032	-0.0007032	397.8	-0.6491	-0.0006491	397.8	-0.6403	-0.0006403	397.8	-0.6185	-0.0006185	397.8	-0.618	-0.000618	397.8	-0.601	-0.000601		397.8	-0.7032	-0.0007032	397.8	-0.6553	-0.0006553	397.8	-0.6441	-0.0006441	397.8	-0.6365	-0.0006365	397.8	-0.6322	-0.0006322	397.8	-0.6287	-0.0006287		397.8	-0.7032	-0.0007032	397.8	-0.6463	-0.0006463	397.8	-0.6377	-0.0006377	397.8	-0.6262
	398.3	-0.7032	-0.0007032	398.3	-0.6491	-0.0006491	398.3	-0.6403	-0.0006403	398.3	-0.6185	-0.0006185	398.3	-0.618	-0.000618	398.3	-0.601	-0.000601		398.3	-0.7032	-0.0007032	398.3	-0.6553	-0.0006553	398.3	-0.6441	-0.0006441	398.3	-0.6365	-0.0006365	398.3	-0.6322	-0.0006322	398.3	-0.6287	-0.0006287		398.3	-0.7032	-0.0007032	398.3	-0.6463	-0.0006463	398.3	-0.6377	-0.0006377	398.3	-0.6262
	398.8	-0.7031	-0.0007031	398.8	-0.6491	-0.0006491	398.8	-0.6403	-0.0006403	398.8	-0.6185	-0.0006185	398.8	-0.618	-0.000618	398.8	-0.601	-0.000601		398.8	-0.7031	-0.0007031	398.8	-0.6553	-0.0006553	398.8	-0.6441	-0.0006441	398.8	-0.6365	-0.0006365	398.8	-0.6322	-0.0006322	398.8	-0.6287	-0.0006287		398.8	-0.7031	-0.0007031	398.8	-0.6463	-0.0006463	398.8	-0.6377	-0.0006377	398.8	-0.6262
	399.3	-0.7031	-0.0007031	399.3	-0.6491	-0.0006491	399.3	-0.6403	-0.0006403	399.3	-0.6186	-0.0006186	399.3	-0.6181	-0.0006181	399.3	-0.601	-0.000601		399.3	-0.7031	-0.0007031	399.3	-0.6553	-0.0006553	399.3	-0.6441	-0.0006441	399.3	-0.6365	-0.0006365	399.3	-0.6322	-0.0006322	399.3	-0.6287	-0.0006287		399.3	-0.7031	-0.0007031	399.3	-0.6463	-0.0006463	399.3	-0.6377	-0.0006377	399.3	-0.6262
	399.8	-0.703	-0.000703	399.8	-0.6491	-0.0006491	399.8	-0.6403	-0.0006403	399.8	-0.6186	-0.0006186	399.8	-0.6181	-0.0006181	399.8	-0.6011	-0.0006011		399.8	-0.703	-0.000703	399.8	-0.6553	-0.0006553	399.8	-0.6441	-0.0006441	399.8	-0.6365	-0.0006365	399.8	-0.6322	-0.0006322	399.8	-0.6287	-0.0006287		399.8	-0.703	-0.000703	399.8	-0.6463	-0.0006463	399.8	-0.6377	-0.0006377	399.8	-0.6262
	400.4	-0.703	-0.000703	400.4	-0.6491	-0.0006491	400.4	-0.6403	-0.0006403	400.4	-0.6186	-0.0006186	400.4	-0.6181	-0.0006181	400.4	-0.6011	-0.0006011		400.4	-0.703	-0.000703	400.4	-0.6553	-0.0006553	400.4	-0.6441	-0.0006441	400.4	-0.6365	-0.0006365	400.4	-0.6322	-0.0006322	400.4	-0.6287	-0.0006287		400.4	-0.703	-0.000703	400.4	-0.6463	-0.0006463	400.4	-0.6377	-0.0006377	400.4	-0.6262
	400.9	-0.703	-0.000703	400.9	-0.6492	-0.0006492	400.9	-0.6403	-0.0006403	400.9	-0.6187	-0.0006187	400.9	-0.6181	-0.0006181	400.9	-0.6011	-0.0006011		400.9	-0.703	-0.000703	400.9	-0.6552	-0.0006552	400.9	-0.6441	-0.0006441	400.9	-0.6365	-0.0006365	400.9	-0.6322	-0.0006322	400.9	-0.6287	-0.0006287		400.9	-0.703	-0.000703	400.9	-0.6463	-0.0006463	400.9	-0.6377	-0.0006377	400.9	-0.6262
	401.4	-0.7029	-0.0007029	401.4	-0.6492	-0.0006492	401.4	-0.6403	-0.0006403	401.4	-0.6187	-0.0006187	401.4	-0.6181	-0.0006181	401.4	-0.6011	-0.0006011		401.4	-0.7029	-0.0007029	401.4	-0.6552	-0.0006552	401.4	-0.6441	-0.0006441	401.4	-0.6365	-0.0006365	401.4	-0.6322	-0.0006322	401.4	-0.6287	-0.0006287		401.4	-0.7029	-0.0007029	401.4	-0.6463	-0.0006463	401.4	-0.6377	-0.0006377	401.4	-0.6261
	401.9	-0.7029	-0.0007029	401.9	-0.6492	-0.0006492	401.9	-0.6403	-0.0006403	401.9	-0.6187	-0.0006187	401.9	-0.6182	-0.0006182	401.9	-0.6011	-0.0006011		401.9	-0.7029	-0.0007029	401.9	-0.6552	-0.0006552	401.9	-0.6441	-0.0006441	401.9	-0.6365	-0.0006365	401.9	-0.6322	-0.0006322	401.9	-0.6287	-0.0006287		401.9	-0.7029	-0.0007029	401.9	-0.6463	-0.0006463	401.9	-0.6377	-0.0006377	401.9	-0.6261
	402.4	-0.7029	-0.0007029	402.4	-0.6492	-0.0006492	402.4	-0.6403	-0.0006403	402.4	-0.6187	-0.0006187	402.4	-0.6182	-0.0006182	402.4	-0.6012	-0.0006012		402.4	-0.7029	-0.0007029	402.4	-0.6552	-0.0006552	402.4	-0.6441	-0.0006441	402.4	-0.6365	-0.0006365	402.4	-0.6322	-0.0006322	402.4	-0.6287	-0.0006287		402.4	-0.7029	-0.0007029	402.4	-0.6463	-0.0006463	402.4	-0.6377	-0.0006377	402.4	-0.6261
	402.9	-0.7029	-0.0007029	402.9	-0.6492	-0.0006492	402.9	-0.6403	-0.0006403	402.9	-0.6188	-0.0006188	402.9	-0.6182	-0.0006182	402.9	-0.6012	-0.0006012		402.9	-0.7029	-0.0007029	402.9	-0.6552	-0.0006552	402.9	-0.6441	-0.0006441	402.9	-0.6365	-0.0006365	402.9	-0.6322	-0.0006322	402.9	-0.6287	-0.0006287		402.9	-0.7029	-0.0007029	402.9	-0.6464	-0.0006464	402.9	-0.6377	-0.0006377	402.9	-0.6261
	403.4	-0.7029	-0.0007029	403.4	-0.6492	-0.0006492	403.4	-0.6403	-0.0006403	403.4	-0.6188	-0.0006188	403.4	-0.6182	-0.0006182	403.4	-0.6012	-0.0006012		403.4	-0.7029	-0.0007029	403.4	-0.6552	-0.0006552	403.4	-0.6441	-0.0006441	403.4	-0.6365	-0.0006365	403.4	-0.6322	-0.0006322	403.4	-0.6287	-0.0006287		403.4	-0.7029	-0.0007029	403.4	-0.6464	-0.0006464	403.4	-0.6377	-0.0006377	403.4	-0.6261
	403.9	-0.7029	-0.0007029	403.9	-0.6492	-0.0006492	403.9	-0.6403	-0.0006403	403.9	-0.6188	-0.0006188	403.9	-0.6182	-0.0006182	403.9	-0.6012	-0.0006012		403.9	-0.7029	-0.0007029	403.9	-0.6552	-0.0006552	403.9	-0.6441	-0.0006441	403.9	-0.6365	-0.0006365	403.9	-0.6322	-0.0006322	403.9	-0.6287	-0.0006287		403.9	-0.7029	-0.0007029	403.9	-0.6464	-0.0006464	403.9	-0.6377	-0.0006377	403.9	-0.6261
	404.4	-0.7029	-0.0007029	404.4	-0.6492	-0.0006492	404.4	-0.6403	-0.0006403	404.4	-0.6188	-0.0006188	404.4	-0.6183	-0.0006183	404.4	-0.6013	-0.0006013		404.4	-0.7029	-0.0007029	404.4	-0.6552	-0.0006552	404.4	-0.6441	-0.0006441	404.4	-0.6365	-0.0006365	404.4	-0.6322	-0.0006322	404.4	-0.6287	-0.0006287		404.4	-0.7029	-0.0007029	404.4	-0.6464	-0.0006464	404.4	-0.6377	-0.0006377	404.4	-0.6261
	404.9	-0.7029	-0.0007029	404.9	-0.6492	-0.0006492	404.9	-0.6403	-0.0006403	404.9	-0.6188	-0.0006188	404.9	-0.6183	-0.0006183	404.9	-0.6013	-0.0006013		404.9	-0.7029	-0.0007029	404.9	-0.6552	-0.0006552	404.9	-0.6441	-0.0006441	404.9	-0.6365	-0.0006365	404.9	-0.6322	-0.0006322	404.9	-0.6287	-0.0006287		404.9	-0.7029	-0.0007029	404.9	-0.6464	-0.0006464	404.9	-0.6377	-0.0006377	404.9	-0.626
	405.5	-0.7028	-0.0007028	405.5	-0.6492	-0.0006492	405.5	-0.6403	-0.0006403	405.5	-0.6188	-0.0006188	405.5	-0.6183	-0.0006183	405.5	-0.6013	-0.0006013		405.5	-0.7028	-0.0007028	405.5	-0.6552	-0.0006552	405.5	-0.6441	-0.0006441	405.5	-0.6365	-0.0006365	405.5	-0.6322	-0.0006322	405.5	-0.6287	-0.0006287		405.5	-0.7028	-0.0007028	405.5	-0.6464	-0.0006464	405.5	-0.6377	-0.0006377	405.5	-0.626
	406	-0.7028	-0.0007028	406	-0.6492	-0.0006492	406	-0.6403	-0.0006403	406	-0.6188	-0.0006188	406	-0.6183	-0.0006183	406	-0.6013	-0.0006013		406	-0.7028	-0.0007028	406	-0.6551	-0.0006551	406	-0.6441	-0.0006441	406	-0.6365	-0.0006365	406	-0.6322	-0.0006322	406	-0.6287	-0.0006287		406	-0.7028	-0.0007028	406	-0.6464	-0.0006464	406	-0.6377	-0.0006377	406	-0.626
	406.5	-0.7028	-0.0007028	406.5	-0.6492	-0.0006492	406.5	-0.6403	-0.0006403	406.5	-0.6188	-0.0006188	406.5	-0.6183	-0.0006183	406.5	-0.6013	-0.0006013		406.5	-0.7028	-0.0007028	406.5	-0.6551	-0.0006551	406.5	-0.6441	-0.0006441	406.5	-0.6365	-0.0006365	406.5	-0.6322	-0.0006322	406.5	-0.6287	-0.0006287		406.5	-0.7028	-0.0007028	406.5	-0.6464	-0.0006464	406.5	-0.6377	-0.0006377	406.5	-0.626
	407	-0.7028	-0.0007028	407	-0.6492	-0.0006492	407	-0.6403	-0.0006403	407	-0.6188	-0.0006188	407	-0.6184	-0.0006184	407	-0.6013	-0.0006013		407	-0.7028	-0.0007028	407	-0.6551	-0.0006551	407	-0.6441	-0.0006441	407	-0.6365	-0.0006365	407	-0.6322	-0.0006322	407	-0.6287	-0.0006287		407	-0.7028	-0.0007028	407	-0.6464	-0.0006464	407	-0.6377	-0.0006377	407	-0.626
	407.5	-0.7027	-0.0007027	407.5	-0.6492	-0.0006492	407.5	-0.6403	-0.0006403	407.5	-0.6188	-0.0006188	407.5	-0.6184	-0.0006184	407.5	-0.6014	-0.0006014		407.5	-0.7027	-0.0007027	407.5	-0.6551	-0.0006551	407.5	-0.6441	-0.0006441	407.5	-0.6365	-0.0006365	407.5	-0.6322	-0.0006322	407.5	-0.6287	-0.0006287		407.5	-0.7027	-0.0007027	407.5	-0.6465	-0.0006465	407.5	-0.6377	-0.0006377	407.5	-0.626
	408	-0.7027	-0.0007027	408	-0.6492	-0.0006492	408	-0.6403	-0.0006403	408	-0.6189	-0.0006189	408	-0.6184	-0.0006184	408	-0.6014	-0.0006014		408	-0.7027	-0.0007027	408	-0.6551	-0.0006551	408	-0.6441	-0.0006441	408	-0.6365	-0.0006365	408	-0.6322	-0.0006322	408	-0.6287	-0.0006287		408	-0.7027	-0.0007027	408	-0.6465	-0.0006465	408	-0.6377	-0.0006377	408	-0.626
	408.5	-0.7027	-0.0007027	408.5	-0.6492	-0.0006492	408.5	-0.6403	-0.0006403	408.5	-0.6189	-0.0006189	408.5	-0.6184	-0.0006184	408.5	-0.6014	-0.0006014		408.5	-0.7027	-0.0007027	408.5	-0.6551	-0.0006551	408.5	-0.6441	-0.0006441	408.5	-0.6365	-0.0006365	408.5	-0.6322	-0.0006322	408.5	-0.6287	-0.0006287		408.5	-0.7027	-0.0007027	408.5	-0.6465	-0.0006465	408.5	-0.6377	-0.0006377	408.5	-0.626
	409	-0.7026	-0.0007026	409	-0.6492	-0.0006492	409	-0.6403	-0.0006403	409	-0.6189	-0.0006189	409	-0.6185	-0.0006185	409	-0.6014	-0.0006014		409	-0.7026	-0.0007026	409	-0.6551	-0.0006551	409	-0.6441	-0.0006441	409	-0.6365	-0.0006365	409	-0.6322	-0.0006322	409	-0.6287	-0.0006287		409	-0.7026	-0.0007026	409	-0.6465	-0.0006465	409	-0.6377	-0.0006377	409	-0.6259
	409.5	-0.7026	-0.0007026	409.5	-0.6492	-0.0006492	409.5	-0.6403	-0.0006403	409.5	-0.619	-0.000619	409.5	-0.6185	-0.0006185	409.5	-0.6014	-0.0006014		409.5	-0.7026	-0.0007026	409.5	-0.6551	-0.0006551	409.5	-0.6441	-0.0006441	409.5	-0.6365	-0.0006365	409.5	-0.6322	-0.0006322	409.5	-0.6287	-0.0006287		409.5	-0.7026	-0.0007026	409.5	-0.6465	-0.0006465	409.5	-0.6377	-0.0006377	409.5	-0.6259
	410	-0.7026	-0.0007026	410	-0.6492	-0.0006492	410	-0.6403	-0.0006403	410	-0.619	-0.000619	410	-0.6185	-0.0006185	410	-0.6014	-0.0006014		410	-0.7026	-0.0007026	410	-0.655	-0.000655	410	-0.6441	-0.0006441	410	-0.6365	-0.0006365	410	-0.6322	-0.0006322	410	-0.6288	-0.0006288		410	-0.7026	-0.0007026	410	-0.6465	-0.0006465	410	-0.6377	-0.0006377	410	-0.6259
	410.5	-0.7026	-0.0007026	410.5	-0.6493	-0.0006493	410.5	-0.6403	-0.0006403	410.5	-0.6191	-0.0006191	410.5	-0.6185	-0.0006185	410.5	-0.6015	-0.0006015		410.5	-0.7026	-0.0007026	410.5	-0.655	-0.000655	410.5	-0.6441	-0.0006441	410.5	-0.6365	-0.0006365	410.5	-0.6322	-0.0006322	410.5	-0.6288	-0.0006288		410.5	-0.7026	-0.0007026	410.5	-0.6465	-0.0006465	410.5	-0.6377	-0.0006377	410.5	-0.6259
	411.1	-0.7025	-0.0007025	411.1	-0.6493	-0.0006493	411.1	-0.6403	-0.0006403	411.1	-0.6191	-0.0006191	411.1	-0.6185	-0.0006185	411.1	-0.6015	-0.0006015		411.1	-0.7025	-0.0007025	411.1	-0.655	-0.000655	411.1	-0.6441	-0.0006441	411.1	-0.6365	-0.0006365	411.1	-0.6322	-0.0006322	411.1	-0.6288	-0.0006288		411.1	-0.7025	-0.0007025	411.1	-0.6465	-0.0006465	411.1	-0.6377	-0.0006377	411.1	-0.6259
	411.6	-0.7025	-0.0007025	411.6	-0.6493	-0.0006493	411.6	-0.6403	-0.0006403	411.6	-0.6191	-0.0006191	411.6	-0.6186	-0.0006186	411.6	-0.6015	-0.0006015		411.6	-0.7025	-0.0007025	411.6	-0.655	-0.000655	411.6	-0.644	-0.000644	411.6	-0.6365	-0.0006365	411.6	-0.6322	-0.0006322	411.6	-0.6288	-0.0006288		411.6	-0.7025	-0.0007025	411.6	-0.6465	-0.0006465	411.6	-0.6377	-0.0006377	411.6	-0.6259
	412.1	-0.7025	-0.0007025	412.1	-0.6493	-0.0006493	412.1	-0.6403	-0.0006403	412.1	-0.6191	-0.0006191	412.1	-0.6186	-0.0006186	412.1	-0.6015	-0.0006015		412.1	-0.7025	-0.0007025	412.1	-0.655	-0.000655	412.1	-0.644	-0.000644	412.1	-0.6365	-0.0006365	412.1	-0.6322	-0.0006322	412.1	-0.6288	-0.0006288		412.1	-0.7025	-0.0007025	412.1	-0.6465	-0.0006465	412.1	-0.6377	-0.0006377	412.1	-0.6259
	412.6	-0.7025	-0.0007025	412.6	-0.6493	-0.0006493	412.6	-0.6403	-0.0006403	412.6	-0.6192	-0.0006192	412.6	-0.6186	-0.0006186	412.6	-0.6015	-0.0006015		412.6	-0.7025	-0.0007025	412.6	-0.655	-0.000655	412.6	-0.644	-0.000644	412.6	-0.6365	-0.0006365	412.6	-0.6322	-0.0006322	412.6	-0.6288	-0.0006288		412.6	-0.7025	-0.0007025	412.6	-0.6466	-0.0006466	412.6	-0.6377	-0.0006377	412.6	-0.6259
	413.1	-0.7025	-0.0007025	413.1	-0.6493	-0.0006493	413.1	-0.6403	-0.0006403	413.1	-0.6192	-0.0006192	413.1	-0.6186	-0.0006186	413.1	-0.6015	-0.0006015		413.1	-0.7025	-0.0007025	413.1	-0.655	-0.000655	413.1	-0.644	-0.000644	413.1	-0.6365	-0.0006365	413.1	-0.6322	-0.0006322	413.1	-0.6287	-0.0006287		413.1	-0.7025	-0.0007025	413.1	-0.6466	-0.0006466	413.1	-0.6377	-0.0006377	413.1	-0.6259
	413.6	-0.7025	-0.0007025	413.6	-0.6493	-0.0006493	413.6	-0.6404	-0.0006404	413.6	-0.6192	-0.0006192	413.6	-0.6187	-0.0006187	413.6	-0.6016	-0.0006016		413.6	-0.7025	-0.0007025	413.6	-0.655	-0.000655	413.6	-0.644	-0.000644	413.6	-0.6365	-0.0006365	413.6	-0.6322	-0.0006322	413.6	-0.6287	-0.0006287		413.6	-0.7025	-0.0007025	413.6	-0.6466	-0.0006466	413.6	-0.6377	-0.0006377	413.6	-0.6258
	414.1	-0.7025	-0.0007025	414.1	-0.6493	-0.0006493	414.1	-0.6404	-0.0006404	414.1	-0.6192	-0.0006192	414.1	-0.6187	-0.0006187	414.1	-0.6016	-0.0006016		414.1	-0.7025	-0.0007025	414.1	-0.655	-0.000655	414.1	-0.644	-0.000644	414.1	-0.6365	-0.0006365	414.1	-0.6322	-0.0006322	414.1	-0.6287	-0.0006287		414.1	-0.7025	-0.0007025	414.1	-0.6466	-0.0006466	414.1	-0.6377	-0.0006377	414.1	-0.6258
	414.6	-0.7025	-0.0007025	414.6	-0.6493	-0.0006493	414.6	-0.6404	-0.0006404	414.6	-0.6192	-0.0006192	414.6	-0.6187	-0.0006187	414.6	-0.6016	-0.0006016		414.6	-0.7025	-0.0007025	414.6	-0.655	-0.000655	414.6	-0.644	-0.000644	414.6	-0.6365	-0.0006365	414.6	-0.6322	-0.0006322	414.6	-0.6287	-0.0006287		414.6	-0.7025	-0.0007025	414.6	-0.6466	-0.0006466	414.6	-0.6377	-0.0006377	414.6	-0.6258
	415.1	-0.7025	-0.0007025	415.1	-0.6493	-0.0006493	415.1	-0.6404	-0.0006404	415.1	-0.6192	-0.0006192	415.1	-0.6187	-0.0006187	415.1	-0.6016	-0.0006016		415.1	-0.7025	-0.0007025	415.1	-0.655	-0.000655	415.1	-0.644	-0.000644	415.1	-0.6365	-0.0006365	415.1	-0.6322	-0.0006322	415.1	-0.6287	-0.0006287		415.1	-0.7025	-0.0007025	415.1	-0.6466	-0.0006466	415.1	-0.6377	-0.0006377	415.1	-0.6258
	415.6	-0.7025	-0.0007025	415.6	-0.6493	-0.0006493	415.6	-0.6404	-0.0006404	415.6	-0.6192	-0.0006192	415.6	-0.6187	-0.0006187	415.6	-0.6016	-0.0006016		415.6	-0.7025	-0.0007025	415.6	-0.6549	-0.0006549	415.6	-0.644	-0.000644	415.6	-0.6365	-0.0006365	415.6	-0.6322	-0.0006322	415.6	-0.6287	-0.0006287		415.6	-0.7025	-0.0007025	415.6	-0.6466	-0.0006466	415.6	-0.6377	-0.0006377	415.6	-0.6258
	416.2	-0.7025	-0.0007025	416.2	-0.6493	-0.0006493	416.2	-0.6404	-0.0006404	416.2	-0.6193	-0.0006193	416.2	-0.6188	-0.0006188	416.2	-0.6016	-0.0006016		416.2	-0.7025	-0.0007025	416.2	-0.6549	-0.0006549	416.2	-0.644	-0.000644	416.2	-0.6365	-0.0006365	416.2	-0.6322	-0.0006322	416.2	-0.6287	-0.0006287		416.2	-0.7025	-0.0007025	416.2	-0.6466	-0.0006466	416.2	-0.6377	-0.0006377	416.2	-0.6258
	416.7	-0.7025	-0.0007025	416.7	-0.6493	-0.0006493	416.7	-0.6404	-0.0006404	416.7	-0.6193	-0.0006193	416.7	-0.6188	-0.0006188	416.7	-0.6017	-0.0006017		416.7	-0.7025	-0.0007025	416.7	-0.6549	-0.0006549	416.7	-0.644	-0.000644	416.7	-0.6365	-0.0006365	416.7	-0.6322	-0.0006322	416.7	-0.6287	-0.0006287		416.7	-0.7025	-0.0007025	416.7	-0.6466	-0.0006466	416.7	-0.6377	-0.0006377	416.7	-0.6258
	417.2	-0.7025	-0.0007025	417.2	-0.6493	-0.0006493	417.2	-0.6404	-0.0006404	417.2	-0.6193	-0.0006193	417.2	-0.6188	-0.0006188	417.2	-0.6017	-0.0006017		417.2	-0.7025	-0.0007025	417.2	-0.6549	-0.0006549	417.2	-0.644	-0.000644	417.2	-0.6365	-0.0006365	417.2	-0.6322	-0.0006322	417.2	-0.6287	-0.0006287		417.2	-0.7025	-0.0007025	417.2	-0.6466	-0.0006466	417.2	-0.6377	-0.0006377	417.2	-0.6258
	417.7	-0.7025	-0.0007025	417.7	-0.6493	-0.0006493	417.7	-0.6404	-0.0006404	417.7	-0.6193	-0.0006193	417.7	-0.6188	-0.0006188	417.7	-0.6017	-0.0006017		417.7	-0.7025	-0.0007025	417.7	-0.6549	-0.0006549	417.7	-0.644	-0.000644	417.7	-0.6365	-0.0006365	417.7	-0.6322	-0.0006322	417.7	-0.6287	-0.0006287		417.7	-0.7025	-0.0007025	417.7	-0.6466	-0.0006466	417.7	-0.6377	-0.0006377	417.7	-0.6258
	418.2	-0.7024	-0.0007024	418.2	-0.6493	-0.0006493	418.2	-0.6404	-0.0006404	418.2	-0.6193	-0.0006193	418.2	-0.6189	-0.0006189	418.2	-0.6017	-0.0006017		418.2	-0.7024	-0.0007024	418.2	-0.6549	-0.0006549	418.2	-0.644	-0.000644	418.2	-0.6365	-0.0006365	418.2	-0.6322	-0.0006322	418.2	-0.6287	-0.0006287		418.2	-0.7024	-0.0007024	418.2	-0.6466	-0.0006466	418.2	-0.6377	-0.0006377	418.2	-0.6258
	418.7	-0.7024	-0.0007024	418.7	-0.6493	-0.0006493	418.7	-0.6404	-0.0006404	418.7	-0.6193	-0.0006193	418.7	-0.6189	-0.0006189	418.7	-0.6017	-0.0006017		418.7	-0.7024	-0.0007024	418.7	-0.6549	-0.0006549	418.7	-0.644	-0.000644	418.7	-0.6365	-0.0006365	418.7	-0.6322	-0.0006322	418.7	-0.6287	-0.0006287		418.7	-0.7024	-0.0007024	418.7	-0.6466	-0.0006466	418.7	-0.6377	-0.0006377	418.7	-0.6258
	419.2	-0.7024	-0.0007024	419.2	-0.6493	-0.0006493	419.2	-0.6404	-0.0006404	419.2	-0.6193	-0.0006193	419.2	-0.6189	-0.0006189	419.2	-0.6017	-0.0006017		419.2	-0.7024	-0.0007024	419.2	-0.6549	-0.0006549	419.2	-0.644	-0.000644	419.2	-0.6365	-0.0006365	419.2	-0.6322	-0.0006322	419.2	-0.6287	-0.0006287		419.2	-0.7024	-0.0007024	419.2	-0.6466	-0.0006466	419.2	-0.6377	-0.0006377	419.2	-0.6258
	419.7	-0.7023	-0.0007023	419.7	-0.6493	-0.0006493	419.7	-0.6404	-0.0006404	419.7	-0.6193	-0.0006193	419.7	-0.6189	-0.0006189	419.7	-0.6017	-0.0006017		419.7	-0.7023	-0.0007023	419.7	-0.6549	-0.0006549	419.7	-0.644	-0.000644	419.7	-0.6365	-0.0006365	419.7	-0.6322	-0.0006322	419.7	-0.6287	-0.0006287		419.7	-0.7023	-0.0007023	419.7	-0.6466	-0.0006466	419.7	-0.6377	-0.0006377	419.7	-0.6258
	420.2	-0.7023	-0.0007023	420.2	-0.6493	-0.0006493	420.2	-0.6404	-0.0006404	420.2	-0.6193	-0.0006193	420.2	-0.6189	-0.0006189	420.2	-0.6018	-0.0006018		420.2	-0.7023	-0.0007023	420.2	-0.6549	-0.0006549	420.2	-0.644	-0.000644	420.2	-0.6365	-0.0006365	420.2	-0.6322	-0.0006322	420.2	-0.6288	-0.0006288		420.2	-0.7023	-0.0007023	420.2	-0.6466	-0.0006466	420.2	-0.6377	-0.0006377	420.2	-0.6258
	420.8	-0.7023	-0.0007023	420.8	-0.6493	-0.0006493	420.8	-0.6404	-0.0006404	420.8	-0.6193	-0.0006193	420.8	-0.619	-0.000619	420.8	-0.6018	-0.0006018		420.8	-0.7023	-0.0007023	420.8	-0.6549	-0.0006549	420.8	-0.644	-0.000644	420.8	-0.6365	-0.0006365	420.8	-0.6322	-0.0006322	420.8	-0.6288	-0.0006288		420.8	-0.7023	-0.0007023	420.8	-0.6467	-0.0006467	420.8	-0.6377	-0.0006377	420.8	-0.6258
	421.3	-0.7023	-0.0007023	421.3	-0.6493	-0.0006493	421.3	-0.6404	-0.0006404	421.3	-0.6194	-0.0006194	421.3	-0.619	-0.000619	421.3	-0.6018	-0.0006018		421.3	-0.7023	-0.0007023	421.3	-0.6549	-0.0006549	421.3	-0.644	-0.000644	421.3	-0.6365	-0.0006365	421.3	-0.6322	-0.0006322	421.3	-0.6288	-0.0006288		421.3	-0.7023	-0.0007023	421.3	-0.6467	-0.0006467	421.3	-0.6377	-0.0006377	421.3	-0.6258
	421.8	-0.7022	-0.0007022	421.8	-0.6493	-0.0006493	421.8	-0.6404	-0.0006404	421.8	-0.6194	-0.0006194	421.8	-0.619	-0.000619	421.8	-0.6018	-0.0006018		421.8	-0.7022	-0.0007022	421.8	-0.6548	-0.0006548	421.8	-0.644	-0.000644	421.8	-0.6365	-0.0006365	421.8	-0.6322	-0.0006322	421.8	-0.6288	-0.0006288		421.8	-0.7022	-0.0007022	421.8	-0.6467	-0.0006467	421.8	-0.6376	-0.0006376	421.8	-0.6258
	422.3	-0.7022	-0.0007022	422.3	-0.6493	-0.0006493	422.3	-0.6404	-0.0006404	422.3	-0.6194	-0.0006194	422.3	-0.619	-0.000619	422.3	-0.6018	-0.0006018		422.3	-0.7022	-0.0007022	422.3	-0.6548	-0.0006548	422.3	-0.644	-0.000644	422.3	-0.6365	-0.0006365	422.3	-0.6322	-0.0006322	422.3	-0.6288	-0.0006288		422.3	-0.7022	-0.0007022	422.3	-0.6467	-0.0006467	422.3	-0.6376	-0.0006376	422.3	-0.6258
	422.8	-0.7021	-0.0007021	422.8	-0.6494	-0.0006494	422.8	-0.6404	-0.0006404	422.8	-0.6194	-0.0006194	422.8	-0.619	-0.000619	422.8	-0.6018	-0.0006018		422.8	-0.7021	-0.0007021	422.8	-0.6548	-0.0006548	422.8	-0.644	-0.000644	422.8	-0.6365	-0.0006365	422.8	-0.6322	-0.0006322	422.8	-0.6288	-0.0006288		422.8	-0.7021	-0.0007021	422.8	-0.6467	-0.0006467	422.8	-0.6376	-0.0006376	422.8	-0.6258
	423.3	-0.7021	-0.0007021	423.3	-0.6494	-0.0006494	423.3	-0.6404	-0.0006404	423.3	-0.6195	-0.0006195	423.3	-0.6191	-0.0006191	423.3	-0.6018	-0.0006018		423.3	-0.7021	-0.0007021	423.3	-0.6548	-0.0006548	423.3	-0.644	-0.000644	423.3	-0.6365	-0.0006365	423.3	-0.6322	-0.0006322	423.3	-0.6288	-0.0006288		423.3	-0.7021	-0.0007021	423.3	-0.6467	-0.0006467	423.3	-0.6376	-0.0006376	423.3	-0.6258
	423.8	-0.7021	-0.0007021	423.8	-0.6494	-0.0006494	423.8	-0.6404	-0.0006404	423.8	-0.6195	-0.0006195	423.8	-0.6191	-0.0006191	423.8	-0.6019	-0.0006019		423.8	-0.7021	-0.0007021	423.8	-0.6548	-0.0006548	423.8	-0.644	-0.000644	423.8	-0.6364	-0.0006364	423.8	-0.6322	-0.0006322	423.8	-0.6288	-0.0006288		423.8	-0.7021	-0.0007021	423.8	-0.6467	-0.0006467	423.8	-0.6376	-0.0006376	423.8	-0.6257
	424.3	-0.702	-0.000702	424.3	-0.6494	-0.0006494	424.3	-0.6404	-0.0006404	424.3	-0.6195	-0.0006195	424.3	-0.6191	-0.0006191	424.3	-0.6019	-0.0006019		424.3	-0.702	-0.000702	424.3	-0.6548	-0.0006548	424.3	-0.644	-0.000644	424.3	-0.6364	-0.0006364	424.3	-0.6322	-0.0006322	424.3	-0.6288	-0.0006288		424.3	-0.702	-0.000702	424.3	-0.6467	-0.0006467	424.3	-0.6376	-0.0006376	424.3	-0.6257
	424.8	-0.702	-0.000702	424.8	-0.6494	-0.0006494	424.8	-0.6404	-0.0006404	424.8	-0.6194	-0.0006194	424.8	-0.6191	-0.0006191	424.8	-0.6019	-0.0006019		424.8	-0.702	-0.000702	424.8	-0.6548	-0.0006548	424.8	-0.644	-0.000644	424.8	-0.6364	-0.0006364	424.8	-0.6322	-0.0006322	424.8	-0.6288	-0.0006288		424.8	-0.702	-0.000702	424.8	-0.6467	-0.0006467	424.8	-0.6376	-0.0006376	424.8	-0.6257
	425.3	-0.702	-0.000702	425.3	-0.6494	-0.0006494	425.3	-0.6404	-0.0006404	425.3	-0.6194	-0.0006194	425.3	-0.6191	-0.0006191	425.3	-0.6019	-0.0006019		425.3	-0.702	-0.000702	425.3	-0.6548	-0.0006548	425.3	-0.644	-0.000644	425.3	-0.6365	-0.0006365	425.3	-0.6322	-0.0006322	425.3	-0.6288	-0.0006288		425.3	-0.702	-0.000702	425.3	-0.6467	-0.0006467	425.3	-0.6376	-0.0006376	425.3	-0.6257
	425.9	-0.7019	-0.0007019	425.9	-0.6494	-0.0006494	425.9	-0.6404	-0.0006404	425.9	-0.6195	-0.0006195	425.9	-0.6192	-0.0006192	425.9	-0.6019	-0.0006019		425.9	-0.7019	-0.0007019	425.9	-0.6548	-0.0006548	425.9	-0.644	-0.000644	425.9	-0.6365	-0.0006365	425.9	-0.6322	-0.0006322	425.9	-0.6288	-0.0006288		425.9	-0.7019	-0.0007019	425.9	-0.6467	-0.0006467	425.9	-0.6376	-0.0006376	425.9	-0.6257
	426.4	-0.7019	-0.0007019	426.4	-0.6494	-0.0006494	426.4	-0.6404	-0.0006404	426.4	-0.6195	-0.0006195	426.4	-0.6192	-0.0006192	426.4	-0.6019	-0.0006019		426.4	-0.7019	-0.0007019	426.4	-0.6548	-0.0006548	426.4	-0.644	-0.000644	426.4	-0.6364	-0.0006364	426.4	-0.6322	-0.0006322	426.4	-0.6288	-0.0006288		426.4	-0.7019	-0.0007019	426.4	-0.6468	-0.0006468	426.4	-0.6376	-0.0006376	426.4	-0.6257
	426.9	-0.7018	-0.0007018	426.9	-0.6494	-0.0006494	426.9	-0.6404	-0.0006404	426.9	-0.6195	-0.0006195	426.9	-0.6192	-0.0006192	426.9	-0.6019	-0.0006019		426.9	-0.7018	-0.0007018	426.9	-0.6547	-0.0006547	426.9	-0.644	-0.000644	426.9	-0.6364	-0.0006364	426.9	-0.6322	-0.0006322	426.9	-0.6288	-0.0006288		426.9	-0.7018	-0.0007018	426.9	-0.6468	-0.0006468	426.9	-0.6376	-0.0006376	426.9	-0.6257
	427.4	-0.7018	-0.0007018	427.4	-0.6494	-0.0006494	427.4	-0.6404	-0.0006404	427.4	-0.6195	-0.0006195	427.4	-0.6192	-0.0006192	427.4	-0.602	-0.000602		427.4	-0.7018	-0.0007018	427.4	-0.6547	-0.0006547	427.4	-0.644	-0.000644	427.4	-0.6364	-0.0006364	427.4	-0.6321	-0.0006321	427.4	-0.6288	-0.0006288		427.4	-0.7018	-0.0007018	427.4	-0.6468	-0.0006468	427.4	-0.6376	-0.0006376	427.4	-0.6257
	427.9	-0.7018	-0.0007018	427.9	-0.6494	-0.0006494	427.9	-0.6404	-0.0006404	427.9	-0.6196	-0.0006196	427.9	-0.6193	-0.0006193	427.9	-0.602	-0.000602		427.9	-0.7018	-0.0007018	427.9	-0.6547	-0.0006547	427.9	-0.644	-0.000644	427.9	-0.6364	-0.0006364	427.9	-0.6321	-0.0006321	427.9	-0.6288	-0.0006288		427.9	-0.7018	-0.0007018	427.9	-0.6468	-0.0006468	427.9	-0.6376	-0.0006376	427.9	-0.6257
	428.4	-0.7017	-0.0007017	428.4	-0.6494	-0.0006494	428.4	-0.6404	-0.0006404	428.4	-0.6196	-0.0006196	428.4	-0.6193	-0.0006193	428.4	-0.602	-0.000602		428.4	-0.7017	-0.0007017	428.4	-0.6547	-0.0006547	428.4	-0.644	-0.000644	428.4	-0.6364	-0.0006364	428.4	-0.6321	-0.0006321	428.4	-0.6288	-0.0006288		428.4	-0.7017	-0.0007017	428.4	-0.6468	-0.0006468	428.4	-0.6376	-0.0006376	428.4	-0.6257
	428.9	-0.7017	-0.0007017	428.9	-0.6495	-0.0006495	428.9	-0.6404	-0.0006404	428.9	-0.6196	-0.0006196	428.9	-0.6193	-0.0006193	428.9	-0.602	-0.000602		428.9	-0.7017	-0.0007017	428.9	-0.6547	-0.0006547	428.9	-0.644	-0.000644	428.9	-0.6364	-0.0006364	428.9	-0.6321	-0.0006321	428.9	-0.6288	-0.0006288		428.9	-0.7017	-0.0007017	428.9	-0.6468	-0.0006468	428.9	-0.6376	-0.0006376	428.9	-0.6257
	429.4	-0.7017	-0.0007017	429.4	-0.6495	-0.0006495	429.4	-0.6404	-0.0006404	429.4	-0.6196	-0.0006196	429.4	-0.6193	-0.0006193	429.4	-0.602	-0.000602		429.4	-0.7017	-0.0007017	429.4	-0.6547	-0.0006547	429.4	-0.644	-0.000644	429.4	-0.6364	-0.0006364	429.4	-0.6321	-0.0006321	429.4	-0.6288	-0.0006288		429.4	-0.7017	-0.0007017	429.4	-0.6468	-0.0006468	429.4	-0.6376	-0.0006376	429.4	-0.6257
	429.9	-0.7017	-0.0007017	429.9	-0.6495	-0.0006495	429.9	-0.6404	-0.0006404	429.9	-0.6197	-0.0006197	429.9	-0.6193	-0.0006193	429.9	-0.602	-0.000602		429.9	-0.7017	-0.0007017	429.9	-0.6547	-0.0006547	429.9	-0.6439	-0.0006439	429.9	-0.6364	-0.0006364	429.9	-0.6321	-0.0006321	429.9	-0.6288	-0.0006288		429.9	-0.7017	-0.0007017	429.9	-0.6468	-0.0006468	429.9	-0.6376	-0.0006376	429.9	-0.6257
	430.4	-0.7017	-0.0007017	430.4	-0.6495	-0.0006495	430.4	-0.6404	-0.0006404	430.4	-0.6197	-0.0006197	430.4	-0.6194	-0.0006194	430.4	-0.6021	-0.0006021		430.4	-0.7017	-0.0007017	430.4	-0.6547	-0.0006547	430.4	-0.6439	-0.0006439	430.4	-0.6364	-0.0006364	430.4	-0.6321	-0.0006321	430.4	-0.6287	-0.0006287		430.4	-0.7017	-0.0007017	430.4	-0.6468	-0.0006468	430.4	-0.6376	-0.0006376	430.4	-0.6257
	431	-0.7017	-0.0007017	431	-0.6495	-0.0006495	431	-0.6404	-0.0006404	431	-0.6197	-0.0006197	431	-0.6194	-0.0006194	431	-0.6021	-0.0006021		431	-0.7017	-0.0007017	431	-0.6547	-0.0006547	431	-0.6439	-0.0006439	431	-0.6364	-0.0006364	431	-0.6321	-0.0006321	431	-0.6287	-0.0006287		431	-0.7017	-0.0007017	431	-0.6468	-0.0006468	431	-0.6376	-0.0006376	431	-0.6257
	431.5	-0.7017	-0.0007017	431.5	-0.6496	-0.0006496	431.5	-0.6404	-0.0006404	431.5	-0.6197	-0.0006197	431.5	-0.6194	-0.0006194	431.5	-0.6021	-0.0006021		431.5	-0.7017	-0.0007017	431.5	-0.6547	-0.0006547	431.5	-0.6439	-0.0006439	431.5	-0.6364	-0.0006364	431.5	-0.6321	-0.0006321	431.5	-0.6287	-0.0006287		431.5	-0.7017	-0.0007017	431.5	-0.6468	-0.0006468	431.5	-0.6376	-0.0006376	431.5	-0.6257
	432	-0.7017	-0.0007017	432	-0.6496	-0.0006496	432	-0.6404	-0.0006404	432	-0.6198	-0.0006198	432	-0.6194	-0.0006194	432	-0.6021	-0.0006021		432	-0.7017	-0.0007017	432	-0.6547	-0.0006547	432	-0.6439	-0.0006439	432	-0.6364	-0.0006364	432	-0.6321	-0.0006321	432	-0.6287	-0.0006287		432	-0.7017	-0.0007017	432	-0.6468	-0.0006468	432	-0.6376	-0.0006376	432	-0.6256
	432.5	-0.7017	-0.0007017	432.5	-0.6496	-0.0006496	432.5	-0.6404	-0.0006404	432.5	-0.6198	-0.0006198	432.5	-0.6194	-0.0006194	432.5	-0.6021	-0.0006021		432.5	-0.7017	-0.0007017	432.5	-0.6547	-0.0006547	432.5	-0.6439	-0.0006439	432.5	-0.6364	-0.0006364	432.5	-0.6321	-0.0006321	432.5	-0.6287	-0.0006287		432.5	-0.7017	-0.0007017	432.5	-0.6468	-0.0006468	432.5	-0.6376	-0.0006376	432.5	-0.6256
	433	-0.7016	-0.0007016	433	-0.6496	-0.0006496	433	-0.6404	-0.0006404	433	-0.6198	-0.0006198	433	-0.6194	-0.0006194	433	-0.6021	-0.0006021		433	-0.7016	-0.0007016	433	-0.6547	-0.0006547	433	-0.6439	-0.0006439	433	-0.6364	-0.0006364	433	-0.6322	-0.0006322	433	-0.6287	-0.0006287		433	-0.7016	-0.0007016	433	-0.6468	-0.0006468	433	-0.6376	-0.0006376	433	-0.6256
	433.5	-0.7016	-0.0007016	433.5	-0.6496	-0.0006496	433.5	-0.6404	-0.0006404	433.5	-0.6198	-0.0006198	433.5	-0.6195	-0.0006195	433.5	-0.6022	-0.0006022		433.5	-0.7016	-0.0007016	433.5	-0.6547	-0.0006547	433.5	-0.6439	-0.0006439	433.5	-0.6364	-0.0006364	433.5	-0.6321	-0.0006321	433.5	-0.6287	-0.0006287		433.5	-0.7016	-0.0007016	433.5	-0.6468	-0.0006468	433.5	-0.6376	-0.0006376	433.5	-0.6257
	434	-0.7016	-0.0007016	434	-0.6496	-0.0006496	434	-0.6404	-0.0006404	434	-0.6199	-0.0006199	434	-0.6195	-0.0006195	434	-0.6022	-0.0006022		434	-0.7016	-0.0007016	434	-0.6546	-0.0006546	434	-0.6439	-0.0006439	434	-0.6364	-0.0006364	434	-0.6321	-0.0006321	434	-0.6287	-0.0006287		434	-0.7016	-0.0007016	434	-0.6469	-0.0006469	434	-0.6376	-0.0006376	434	-0.6257
	434.5	-0.7016	-0.0007016	434.5	-0.6496	-0.0006496	434.5	-0.6404	-0.0006404	434.5	-0.6199	-0.0006199	434.5	-0.6195	-0.0006195	434.5	-0.6022	-0.0006022		434.5	-0.7016	-0.0007016	434.5	-0.6546	-0.0006546	434.5	-0.6439	-0.0006439	434.5	-0.6364	-0.0006364	434.5	-0.6321	-0.0006321	434.5	-0.6287	-0.0006287		434.5	-0.7016	-0.0007016	434.5	-0.6469	-0.0006469	434.5	-0.6376	-0.0006376	434.5	-0.6257
	435	-0.7016	-0.0007016	435	-0.6496	-0.0006496	435	-0.6404	-0.0006404	435	-0.6199	-0.0006199	435	-0.6195	-0.0006195	435	-0.6022	-0.0006022		435	-0.7016	-0.0007016	435	-0.6546	-0.0006546	435	-0.6439	-0.0006439	435	-0.6364	-0.0006364	435	-0.6321	-0.0006321	435	-0.6287	-0.0006287		435	-0.7016	-0.0007016	435	-0.6469	-0.0006469	435	-0.6376	-0.0006376	435	-0.6257
	435.5	-0.7016	-0.0007016	435.5	-0.6496	-0.0006496	435.5	-0.6404	-0.0006404	435.5	-0.6199	-0.0006199	435.5	-0.6195	-0.0006195	435.5	-0.6022	-0.0006022		435.5	-0.7016	-0.0007016	435.5	-0.6546	-0.0006546	435.5	-0.6439	-0.0006439	435.5	-0.6364	-0.0006364	435.5	-0.6321	-0.0006321	435.5	-0.6287	-0.0006287		435.5	-0.7016	-0.0007016	435.5	-0.6469	-0.0006469	435.5	-0.6376	-0.0006376	435.5	-0.6257
	436	-0.7016	-0.0007016	436	-0.6496	-0.0006496	436	-0.6404	-0.0006404	436	-0.6199	-0.0006199	436	-0.6196	-0.0006196	436	-0.6022	-0.0006022		436	-0.7016	-0.0007016	436	-0.6546	-0.0006546	436	-0.6439	-0.0006439	436	-0.6364	-0.0006364	436	-0.6321	-0.0006321	436	-0.6287	-0.0006287		436	-0.7016	-0.0007016	436	-0.6469	-0.0006469	436	-0.6376	-0.0006376	436	-0.6257
	436.6	-0.7016	-0.0007016	436.6	-0.6496	-0.0006496	436.6	-0.6404	-0.0006404	436.6	-0.6199	-0.0006199	436.6	-0.6196	-0.0006196	436.6	-0.6022	-0.0006022		436.6	-0.7016	-0.0007016	436.6	-0.6546	-0.0006546	436.6	-0.6439	-0.0006439	436.6	-0.6364	-0.0006364	436.6	-0.6321	-0.0006321	436.6	-0.6287	-0.0006287		436.6	-0.7016	-0.0007016	436.6	-0.6469	-0.0006469	436.6	-0.6376	-0.0006376	436.6	-0.6257
	437.1	-0.7016	-0.0007016	437.1	-0.6496	-0.0006496	437.1	-0.6404	-0.0006404	437.1	-0.6199	-0.0006199	437.1	-0.6196	-0.0006196	437.1	-0.6023	-0.0006023		437.1	-0.7016	-0.0007016	437.1	-0.6546	-0.0006546	437.1	-0.6439	-0.0006439	437.1	-0.6364	-0.0006364	437.1	-0.6321	-0.0006321	437.1	-0.6287	-0.0006287		437.1	-0.7016	-0.0007016	437.1	-0.6469	-0.0006469	437.1	-0.6376	-0.0006376	437.1	-0.6257
	437.6	-0.7016	-0.0007016	437.6	-0.6496	-0.0006496	437.6	-0.6404	-0.0006404	437.6	-0.6199	-0.0006199	437.6	-0.6196	-0.0006196	437.6	-0.6023	-0.0006023		437.6	-0.7016	-0.0007016	437.6	-0.6546	-0.0006546	437.6	-0.6439	-0.0006439	437.6	-0.6364	-0.0006364	437.6	-0.6321	-0.0006321	437.6	-0.6287	-0.0006287		437.6	-0.7016	-0.0007016	437.6	-0.6469	-0.0006469	437.6	-0.6376	-0.0006376	437.6	-0.6257
	438.1	-0.7016	-0.0007016	438.1	-0.6496	-0.0006496	438.1	-0.6404	-0.0006404	438.1	-0.6199	-0.0006199	438.1	-0.6196	-0.0006196	438.1	-0.6023	-0.0006023		438.1	-0.7016	-0.0007016	438.1	-0.6546	-0.0006546	438.1	-0.6439	-0.0006439	438.1	-0.6363	-0.0006363	438.1	-0.6321	-0.0006321	438.1	-0.6287	-0.0006287		438.1	-0.7016	-0.0007016	438.1	-0.6469	-0.0006469	438.1	-0.6376	-0.0006376	438.1	-0.6257
	438.6	-0.7016	-0.0007016	438.6	-0.6496	-0.0006496	438.6	-0.6404	-0.0006404	438.6	-0.6199	-0.0006199	438.6	-0.6196	-0.0006196	438.6	-0.6023	-0.0006023		438.6	-0.7016	-0.0007016	438.6	-0.6546	-0.0006546	438.6	-0.6439	-0.0006439	438.6	-0.6363	-0.0006363	438.6	-0.6321	-0.0006321	438.6	-0.6287	-0.0006287		438.6	-0.7016	-0.0007016	438.6	-0.6469	-0.0006469	438.6	-0.6376	-0.0006376	438.6	-0.6257
	439.1	-0.7016	-0.0007016	439.1	-0.6496	-0.0006496	439.1	-0.6404	-0.0006404	439.1	-0.6199	-0.0006199	439.1	-0.6197	-0.0006197	439.1	-0.6023	-0.0006023		439.1	-0.7016	-0.0007016	439.1	-0.6546	-0.0006546	439.1	-0.6439	-0.0006439	439.1	-0.6363	-0.0006363	439.1	-0.6321	-0.0006321	439.1	-0.6287	-0.0006287		439.1	-0.7016	-0.0007016	439.1	-0.6469	-0.0006469	439.1	-0.6376	-0.0006376	439.1	-0.6257
	439.6	-0.7015	-0.0007015	439.6	-0.6496	-0.0006496	439.6	-0.6404	-0.0006404	439.6	-0.62	-0.00062	439.6	-0.6197	-0.0006197	439.6	-0.6023	-0.0006023		439.6	-0.7015	-0.0007015	439.6	-0.6546	-0.0006546	439.6	-0.6439	-0.0006439	439.6	-0.6363	-0.0006363	439.6	-0.6321	-0.0006321	439.6	-0.6287	-0.0006287		439.6	-0.7015	-0.0007015	439.6	-0.6469	-0.0006469	439.6	-0.6376	-0.0006376	439.6	-0.6257
	440.1	-0.7015	-0.0007015	440.1	-0.6497	-0.0006497	440.1	-0.6404	-0.0006404	440.1	-0.62	-0.00062	440.1	-0.6197	-0.0006197	440.1	-0.6024	-0.0006024		440.1	-0.7015	-0.0007015	440.1	-0.6546	-0.0006546	440.1	-0.6439	-0.0006439	440.1	-0.6363	-0.0006363	440.1	-0.6321	-0.0006321	440.1	-0.6287	-0.0006287		440.1	-0.7015	-0.0007015	440.1	-0.6469	-0.0006469	440.1	-0.6376	-0.0006376	440.1	-0.6257
	440.6	-0.7015	-0.0007015	440.6	-0.6497	-0.0006497	440.6	-0.6404	-0.0006404	440.6	-0.62	-0.00062	440.6	-0.6197	-0.0006197	440.6	-0.6024	-0.0006024		440.6	-0.7015	-0.0007015	440.6	-0.6546	-0.0006546	440.6	-0.6439	-0.0006439	440.6	-0.6363	-0.0006363	440.6	-0.6321	-0.0006321	440.6	-0.6287	-0.0006287		440.6	-0.7015	-0.0007015	440.6	-0.6469	-0.0006469	440.6	-0.6376	-0.0006376	440.6	-0.6257
	441.1	-0.7015	-0.0007015	441.1	-0.6497	-0.0006497	441.1	-0.6404	-0.0006404	441.1	-0.62	-0.00062	441.1	-0.6197	-0.0006197	441.1	-0.6024	-0.0006024		441.1	-0.7015	-0.0007015	441.1	-0.6546	-0.0006546	441.1	-0.6439	-0.0006439	441.1	-0.6363	-0.0006363	441.1	-0.6321	-0.0006321	441.1	-0.6287	-0.0006287		441.1	-0.7015	-0.0007015	441.1	-0.647	-0.000647	441.1	-0.6376	-0.0006376	441.1	-0.6256
	441.7	-0.7015	-0.0007015	441.7	-0.6497	-0.0006497	441.7	-0.6404	-0.0006404	441.7	-0.62	-0.00062	441.7	-0.6198	-0.0006198	441.7	-0.6024	-0.0006024		441.7	-0.7015	-0.0007015	441.7	-0.6545	-0.0006545	441.7	-0.6439	-0.0006439	441.7	-0.6363	-0.0006363	441.7	-0.6321	-0.0006321	441.7	-0.6287	-0.0006287		441.7	-0.7015	-0.0007015	441.7	-0.647	-0.000647	441.7	-0.6376	-0.0006376	441.7	-0.6256
	442.2	-0.7015	-0.0007015	442.2	-0.6497	-0.0006497	442.2	-0.6404	-0.0006404	442.2	-0.62	-0.00062	442.2	-0.6198	-0.0006198	442.2	-0.6024	-0.0006024		442.2	-0.7015	-0.0007015	442.2	-0.6545	-0.0006545	442.2	-0.6439	-0.0006439	442.2	-0.6363	-0.0006363	442.2	-0.6321	-0.0006321	442.2	-0.6287	-0.0006287		442.2	-0.7015	-0.0007015	442.2	-0.647	-0.000647	442.2	-0.6376	-0.0006376	442.2	-0.6256
	442.7	-0.7015	-0.0007015	442.7	-0.6497	-0.0006497	442.7	-0.6404	-0.0006404	442.7	-0.62	-0.00062	442.7	-0.6198	-0.0006198	442.7	-0.6024	-0.0006024		442.7	-0.7015	-0.0007015	442.7	-0.6545	-0.0006545	442.7	-0.6439	-0.0006439	442.7	-0.6363	-0.0006363	442.7	-0.6321	-0.0006321	442.7	-0.6287	-0.0006287		442.7	-0.7015	-0.0007015	442.7	-0.647	-0.000647	442.7	-0.6376	-0.0006376	442.7	-0.6256
	443.2	-0.7014	-0.0007014	443.2	-0.6497	-0.0006497	443.2	-0.6404	-0.0006404	443.2	-0.62	-0.00062	443.2	-0.6198	-0.0006198	443.2	-0.6024	-0.0006024		443.2	-0.7014	-0.0007014	443.2	-0.6545	-0.0006545	443.2	-0.6439	-0.0006439	443.2	-0.6363	-0.0006363	443.2	-0.6321	-0.0006321	443.2	-0.6287	-0.0006287		443.2	-0.7014	-0.0007014	443.2	-0.647	-0.000647	443.2	-0.6376	-0.0006376	443.2	-0.6256
	443.7	-0.7014	-0.0007014	443.7	-0.6497	-0.0006497	443.7	-0.6404	-0.0006404	443.7	-0.62	-0.00062	443.7	-0.6198	-0.0006198	443.7	-0.6025	-0.0006025		443.7	-0.7014	-0.0007014	443.7	-0.6545	-0.0006545	443.7	-0.6439	-0.0006439	443.7	-0.6363	-0.0006363	443.7	-0.6321	-0.0006321	443.7	-0.6287	-0.0006287		443.7	-0.7014	-0.0007014	443.7	-0.647	-0.000647	443.7	-0.6376	-0.0006376	443.7	-0.6256
	444.2	-0.7014	-0.0007014	444.2	-0.6497	-0.0006497	444.2	-0.6404	-0.0006404	444.2	-0.6201	-0.0006201	444.2	-0.6198	-0.0006198	444.2	-0.6025	-0.0006025		444.2	-0.7014	-0.0007014	444.2	-0.6545	-0.0006545	444.2	-0.6439	-0.0006439	444.2	-0.6363	-0.0006363	444.2	-0.6321	-0.0006321	444.2	-0.6287	-0.0006287		444.2	-0.7014	-0.0007014	444.2	-0.647	-0.000647	444.2	-0.6376	-0.0006376	444.2	-0.6256
	444.7	-0.7014	-0.0007014	444.7	-0.6497	-0.0006497	444.7	-0.6404	-0.0006404	444.7	-0.6201	-0.0006201	444.7	-0.6199	-0.0006199	444.7	-0.6025	-0.0006025		444.7	-0.7014	-0.0007014	444.7	-0.6545	-0.0006545	444.7	-0.6439	-0.0006439	444.7	-0.6363	-0.0006363	444.7	-0.6321	-0.0006321	444.7	-0.6287	-0.0006287		444.7	-0.7014	-0.0007014	444.7	-0.647	-0.000647	444.7	-0.6376	-0.0006376	444.7	-0.6256
	445.2	-0.7014	-0.0007014	445.2	-0.6497	-0.0006497	445.2	-0.6404	-0.0006404	445.2	-0.6201	-0.0006201	445.2	-0.6199	-0.0006199	445.2	-0.6025	-0.0006025		445.2	-0.7014	-0.0007014	445.2	-0.6545	-0.0006545	445.2	-0.6439	-0.0006439	445.2	-0.6363	-0.0006363	445.2	-0.6321	-0.0006321	445.2	-0.6287	-0.0006287		445.2	-0.7014	-0.0007014	445.2	-0.647	-0.000647	445.2	-0.6376	-0.0006376	445.2	-0.6256
	445.7	-0.7014	-0.0007014	445.7	-0.6497	-0.0006497	445.7	-0.6404	-0.0006404	445.7	-0.6201	-0.0006201	445.7	-0.6199	-0.0006199	445.7	-0.6025	-0.0006025		445.7	-0.7014	-0.0007014	445.7	-0.6545	-0.0006545	445.7	-0.6439	-0.0006439	445.7	-0.6363	-0.0006363	445.7	-0.6321	-0.0006321	445.7	-0.6287	-0.0006287		445.7	-0.7014	-0.0007014	445.7	-0.647	-0.000647	445.7	-0.6376	-0.0006376	445.7	-0.6256
	446.3	-0.7013	-0.0007013	446.3	-0.6497	-0.0006497	446.3	-0.6404	-0.0006404	446.3	-0.6202	-0.0006202	446.3	-0.6199	-0.0006199	446.3	-0.6025	-0.0006025		446.3	-0.7013	-0.0007013	446.3	-0.6544	-0.0006544	446.3	-0.6439	-0.0006439	446.3	-0.6363	-0.0006363	446.3	-0.6321	-0.0006321	446.3	-0.6287	-0.0006287		446.3	-0.7013	-0.0007013	446.3	-0.6469	-0.0006469	446.3	-0.6376	-0.0006376	446.3	-0.6255
	446.8	-0.7013	-0.0007013	446.8	-0.6497	-0.0006497	446.8	-0.6404	-0.0006404	446.8	-0.6202	-0.0006202	446.8	-0.6199	-0.0006199	446.8	-0.6025	-0.0006025		446.8	-0.7013	-0.0007013	446.8	-0.6544	-0.0006544	446.8	-0.6439	-0.0006439	446.8	-0.6363	-0.0006363	446.8	-0.6321	-0.0006321	446.8	-0.6287	-0.0006287		446.8	-0.7013	-0.0007013	446.8	-0.6469	-0.0006469	446.8	-0.6376	-0.0006376	446.8	-0.6255
	447.3	-0.7013	-0.0007013	447.3	-0.6497	-0.0006497	447.3	-0.6404	-0.0006404	447.3	-0.6202	-0.0006202	447.3	-0.6199	-0.0006199	447.3	-0.6026	-0.0006026		447.3	-0.7013	-0.0007013	447.3	-0.6544	-0.0006544	447.3	-0.6439	-0.0006439	447.3	-0.6363	-0.0006363	447.3	-0.6321	-0.0006321	447.3	-0.6287	-0.0006287		447.3	-0.7013	-0.0007013	447.3	-0.647	-0.000647	447.3	-0.6376	-0.0006376	447.3	-0.6255
	447.8	-0.7013	-0.0007013	447.8	-0.6497	-0.0006497	447.8	-0.6404	-0.0006404	447.8	-0.6202	-0.0006202	447.8	-0.62	-0.00062	447.8	-0.6026	-0.0006026		447.8	-0.7013	-0.0007013	447.8	-0.6544	-0.0006544	447.8	-0.6439	-0.0006439	447.8	-0.6363	-0.0006363	447.8	-0.6321	-0.0006321	447.8	-0.6287	-0.0006287		447.8	-0.7013	-0.0007013	447.8	-0.647	-0.000647	447.8	-0.6376	-0.0006376	447.8	-0.6255
	448.3	-0.7013	-0.0007013	448.3	-0.6497	-0.0006497	448.3	-0.6404	-0.0006404	448.3	-0.6202	-0.0006202	448.3	-0.62	-0.00062	448.3	-0.6026	-0.0006026		448.3	-0.7013	-0.0007013	448.3	-0.6544	-0.0006544	448.3	-0.6439	-0.0006439	448.3	-0.6362	-0.0006362	448.3	-0.6321	-0.0006321	448.3	-0.6287	-0.0006287		448.3	-0.7013	-0.0007013	448.3	-0.647	-0.000647	448.3	-0.6376	-0.0006376	448.3	-0.6255
	448.8	-0.7013	-0.0007013	448.8	-0.6497	-0.0006497	448.8	-0.6404	-0.0006404	448.8	-0.6202	-0.0006202	448.8	-0.62	-0.00062	448.8	-0.6026	-0.0006026		448.8	-0.7013	-0.0007013	448.8	-0.6544	-0.0006544	448.8	-0.6439	-0.0006439	448.8	-0.6362	-0.0006362	448.8	-0.6321	-0.0006321	448.8	-0.6287	-0.0006287		448.8	-0.7013	-0.0007013	448.8	-0.647	-0.000647	448.8	-0.6376	-0.0006376	448.8	-0.6255
	449.3	-0.7013	-0.0007013	449.3	-0.6497	-0.0006497	449.3	-0.6404	-0.0006404	449.3	-0.6202	-0.0006202	449.3	-0.62	-0.00062	449.3	-0.6026	-0.0006026		449.3	-0.7013	-0.0007013	449.3	-0.6544	-0.0006544	449.3	-0.6439	-0.0006439	449.3	-0.6362	-0.0006362	449.3	-0.6321	-0.0006321	449.3	-0.6287	-0.0006287		449.3	-0.7013	-0.0007013	449.3	-0.647	-0.000647	449.3	-0.6376	-0.0006376	449.3	-0.6255
	449.8	-0.7013	-0.0007013	449.8	-0.6497	-0.0006497	449.8	-0.6404	-0.0006404	449.8	-0.6202	-0.0006202	449.8	-0.62	-0.00062	449.8	-0.6026	-0.0006026		449.8	-0.7013	-0.0007013	449.8	-0.6543	-0.0006543	449.8	-0.6439	-0.0006439	449.8	-0.6362	-0.0006362	449.8	-0.6321	-0.0006321	449.8	-0.6287	-0.0006287		449.8	-0.7013	-0.0007013	449.8	-0.6469	-0.0006469	449.8	-0.6376	-0.0006376	449.8	-0.6255
	450.3	-0.7013	-0.0007013	450.3	-0.6497	-0.0006497	450.3	-0.6404	-0.0006404	450.3	-0.6202	-0.0006202	450.3	-0.6201	-0.0006201	450.3	-0.6026	-0.0006026		450.3	-0.7013	-0.0007013	450.3	-0.6543	-0.0006543	450.3	-0.6439	-0.0006439	450.3	-0.6362	-0.0006362	450.3	-0.6321	-0.0006321	450.3	-0.6287	-0.0006287		450.3	-0.7013	-0.0007013	450.3	-0.6469	-0.0006469	450.3	-0.6376	-0.0006376	450.3	-0.6255
	450.8	-0.7013	-0.0007013	450.8	-0.6497	-0.0006497	450.8	-0.6404	-0.0006404	450.8	-0.6203	-0.0006203	450.8	-0.6201	-0.0006201	450.8	-0.6027	-0.0006027		450.8	-0.7013	-0.0007013	450.8	-0.6543	-0.0006543	450.8	-0.6439	-0.0006439	450.8	-0.6362	-0.0006362	450.8	-0.6321	-0.0006321	450.8	-0.6287	-0.0006287		450.8	-0.7013	-0.0007013	450.8	-0.6469	-0.0006469	450.8	-0.6376	-0.0006376	450.8	-0.6255
	451.4	-0.7013	-0.0007013	451.4	-0.6498	-0.0006498	451.4	-0.6404	-0.0006404	451.4	-0.6203	-0.0006203	451.4	-0.6201	-0.0006201	451.4	-0.6027	-0.0006027		451.4	-0.7013	-0.0007013	451.4	-0.6543	-0.0006543	451.4	-0.6439	-0.0006439	451.4	-0.6362	-0.0006362	451.4	-0.6321	-0.0006321	451.4	-0.6287	-0.0006287		451.4	-0.7013	-0.0007013	451.4	-0.647	-0.000647	451.4	-0.6376	-0.0006376	451.4	-0.6255
	451.9	-0.7013	-0.0007013	451.9	-0.6498	-0.0006498	451.9	-0.6404	-0.0006404	451.9	-0.6203	-0.0006203	451.9	-0.6201	-0.0006201	451.9	-0.6027	-0.0006027		451.9	-0.7013	-0.0007013	451.9	-0.6543	-0.0006543	451.9	-0.6439	-0.0006439	451.9	-0.6362	-0.0006362	451.9	-0.6321	-0.0006321	451.9	-0.6287	-0.0006287		451.9	-0.7013	-0.0007013	451.9	-0.647	-0.000647	451.9	-0.6376	-0.0006376	451.9	-0.6255
	452.4	-0.7013	-0.0007013	452.4	-0.6498	-0.0006498	452.4	-0.6404	-0.0006404	452.4	-0.6203	-0.0006203	452.4	-0.6201	-0.0006201	452.4	-0.6027	-0.0006027		452.4	-0.7013	-0.0007013	452.4	-0.6543	-0.0006543	452.4	-0.6439	-0.0006439	452.4	-0.6362	-0.0006362	452.4	-0.6321	-0.0006321	452.4	-0.6288	-0.0006288		452.4	-0.7013	-0.0007013	452.4	-0.647	-0.000647	452.4	-0.6376	-0.0006376	452.4	-0.6255
	452.9	-0.7012	-0.0007012	452.9	-0.6498	-0.0006498	452.9	-0.6404	-0.0006404	452.9	-0.6203	-0.0006203	452.9	-0.6201	-0.0006201	452.9	-0.6027	-0.0006027		452.9	-0.7012	-0.0007012	452.9	-0.6543	-0.0006543	452.9	-0.6439	-0.0006439	452.9	-0.6362	-0.0006362	452.9	-0.6321	-0.0006321	452.9	-0.6288	-0.0006288		452.9	-0.7012	-0.0007012	452.9	-0.647	-0.000647	452.9	-0.6376	-0.0006376	452.9	-0.6254
	453.4	-0.7012	-0.0007012	453.4	-0.6498	-0.0006498	453.4	-0.6404	-0.0006404	453.4	-0.6203	-0.0006203	453.4	-0.6202	-0.0006202	453.4	-0.6027	-0.0006027		453.4	-0.7012	-0.0007012	453.4	-0.6543	-0.0006543	453.4	-0.6439	-0.0006439	453.4	-0.6362	-0.0006362	453.4	-0.6321	-0.0006321	453.4	-0.6288	-0.0006288		453.4	-0.7012	-0.0007012	453.4	-0.647	-0.000647	453.4	-0.6376	-0.0006376	453.4	-0.6254
	453.9	-0.7012	-0.0007012	453.9	-0.6498	-0.0006498	453.9	-0.6404	-0.0006404	453.9	-0.6203	-0.0006203	453.9	-0.6202	-0.0006202	453.9	-0.6028	-0.0006028		453.9	-0.7012	-0.0007012	453.9	-0.6543	-0.0006543	453.9	-0.6439	-0.0006439	453.9	-0.6362	-0.0006362	453.9	-0.6321	-0.0006321	453.9	-0.6288	-0.0006288		453.9	-0.7012	-0.0007012	453.9	-0.647	-0.000647	453.9	-0.6376	-0.0006376	453.9	-0.6254
	454.4	-0.7012	-0.0007012	454.4	-0.6498	-0.0006498	454.4	-0.6404	-0.0006404	454.4	-0.6203	-0.0006203	454.4	-0.6202	-0.0006202	454.4	-0.6028	-0.0006028		454.4	-0.7012	-0.0007012	454.4	-0.6543	-0.0006543	454.4	-0.6439	-0.0006439	454.4	-0.6362	-0.0006362	454.4	-0.6321	-0.0006321	454.4	-0.6288	-0.0006288		454.4	-0.7012	-0.0007012	454.4	-0.647	-0.000647	454.4	-0.6376	-0.0006376	454.4	-0.6254
	454.9	-0.7012	-0.0007012	454.9	-0.6498	-0.0006498	454.9	-0.6404	-0.0006404	454.9	-0.6204	-0.0006204	454.9	-0.6202	-0.0006202	454.9	-0.6028	-0.0006028		454.9	-0.7012	-0.0007012	454.9	-0.6543	-0.0006543	454.9	-0.6438	-0.0006438	454.9	-0.6362	-0.0006362	454.9	-0.6321	-0.0006321	454.9	-0.6288	-0.0006288		454.9	-0.7012	-0.0007012	454.9	-0.647	-0.000647	454.9	-0.6376	-0.0006376	454.9	-0.6254
	455.4	-0.7011	-0.0007011	455.4	-0.6498	-0.0006498	455.4	-0.6404	-0.0006404	455.4	-0.6204	-0.0006204	455.4	-0.6202	-0.0006202	455.4	-0.6028	-0.0006028		455.4	-0.7011	-0.0007011	455.4	-0.6543	-0.0006543	455.4	-0.6438	-0.0006438	455.4	-0.6362	-0.0006362	455.4	-0.632	-0.000632	455.4	-0.6288	-0.0006288		455.4	-0.7011	-0.0007011	455.4	-0.647	-0.000647	455.4	-0.6376	-0.0006376	455.4	-0.6254
	455.9	-0.7011	-0.0007011	455.9	-0.6498	-0.0006498	455.9	-0.6404	-0.0006404	455.9	-0.6204	-0.0006204	455.9	-0.6202	-0.0006202	455.9	-0.6028	-0.0006028		455.9	-0.7011	-0.0007011	455.9	-0.6543	-0.0006543	455.9	-0.6439	-0.0006439	455.9	-0.6362	-0.0006362	455.9	-0.632	-0.000632	455.9	-0.6288	-0.0006288		455.9	-0.7011	-0.0007011	455.9	-0.647	-0.000647	455.9	-0.6376	-0.0006376	455.9	-0.6254
	456.5	-0.7011	-0.0007011	456.5	-0.6498	-0.0006498	456.5	-0.6404	-0.0006404	456.5	-0.6204	-0.0006204	456.5	-0.6203	-0.0006203	456.5	-0.6028	-0.0006028		456.5	-0.7011	-0.0007011	456.5	-0.6543	-0.0006543	456.5	-0.6439	-0.0006439	456.5	-0.6362	-0.0006362	456.5	-0.632	-0.000632	456.5	-0.6288	-0.0006288		456.5	-0.7011	-0.0007011	456.5	-0.647	-0.000647	456.5	-0.6376	-0.0006376	456.5	-0.6254
	457	-0.7011	-0.0007011	457	-0.6498	-0.0006498	457	-0.6404	-0.0006404	457	-0.6204	-0.0006204	457	-0.6203	-0.0006203	457	-0.6028	-0.0006028		457	-0.7011	-0.0007011	457	-0.6543	-0.0006543	457	-0.6439	-0.0006439	457	-0.6362	-0.0006362	457	-0.632	-0.000632	457	-0.6288	-0.0006288		457	-0.7011	-0.0007011	457	-0.647	-0.000647	457	-0.6376	-0.0006376	457	-0.6254
	457.5	-0.701	-0.000701	457.5	-0.6498	-0.0006498	457.5	-0.6404	-0.0006404	457.5	-0.6204	-0.0006204	457.5	-0.6203	-0.0006203	457.5	-0.6029	-0.0006029		457.5	-0.701	-0.000701	457.5	-0.6543	-0.0006543	457.5	-0.6439	-0.0006439	457.5	-0.6362	-0.0006362	457.5	-0.632	-0.000632	457.5	-0.6288	-0.0006288		457.5	-0.701	-0.000701	457.5	-0.647	-0.000647	457.5	-0.6376	-0.0006376	457.5	-0.6254
	458	-0.701	-0.000701	458	-0.6498	-0.0006498	458	-0.6404	-0.0006404	458	-0.6204	-0.0006204	458	-0.6203	-0.0006203	458	-0.6029	-0.0006029		458	-0.701	-0.000701	458	-0.6542	-0.0006542	458	-0.6439	-0.0006439	458	-0.6362	-0.0006362	458	-0.632	-0.000632	458	-0.6288	-0.0006288		458	-0.701	-0.000701	458	-0.647	-0.000647	458	-0.6376	-0.0006376	458	-0.6254
	458.5	-0.701	-0.000701	458.5	-0.6498	-0.0006498	458.5	-0.6404	-0.0006404	458.5	-0.6204	-0.0006204	458.5	-0.6203	-0.0006203	458.5	-0.6029	-0.0006029		458.5	-0.701	-0.000701	458.5	-0.6542	-0.0006542	458.5	-0.6439	-0.0006439	458.5	-0.6362	-0.0006362	458.5	-0.632	-0.000632	458.5	-0.6288	-0.0006288		458.5	-0.701	-0.000701	458.5	-0.647	-0.000647	458.5	-0.6376	-0.0006376	458.5	-0.6254
	459	-0.701	-0.000701	459	-0.6498	-0.0006498	459	-0.6404	-0.0006404	459	-0.6204	-0.0006204	459	-0.6204	-0.0006204	459	-0.6029	-0.0006029		459	-0.701	-0.000701	459	-0.6542	-0.0006542	459	-0.6439	-0.0006439	459	-0.6362	-0.0006362	459	-0.632	-0.000632	459	-0.6288	-0.0006288		459	-0.701	-0.000701	459	-0.6471	-0.0006471	459	-0.6376	-0.0006376	459	-0.6254
	459.5	-0.7009	-0.0007009	459.5	-0.6498	-0.0006498	459.5	-0.6404	-0.0006404	459.5	-0.6205	-0.0006205	459.5	-0.6204	-0.0006204	459.5	-0.6029	-0.0006029		459.5	-0.7009	-0.0007009	459.5	-0.6542	-0.0006542	459.5	-0.6439	-0.0006439	459.5	-0.6362	-0.0006362	459.5	-0.632	-0.000632	459.5	-0.6288	-0.0006288		459.5	-0.7009	-0.0007009	459.5	-0.6471	-0.0006471	459.5	-0.6376	-0.0006376	459.5	-0.6254
	460	-0.7009	-0.0007009	460	-0.6498	-0.0006498	460	-0.6404	-0.0006404	460	-0.6205	-0.0006205	460	-0.6204	-0.0006204	460	-0.6029	-0.0006029		460	-0.7009	-0.0007009	460	-0.6542	-0.0006542	460	-0.6439	-0.0006439	460	-0.6362	-0.0006362	460	-0.632	-0.000632	460	-0.6288	-0.0006288		460	-0.7009	-0.0007009	460	-0.6471	-0.0006471	460	-0.6376	-0.0006376	460	-0.6254
	460.5	-0.7009	-0.0007009	460.5	-0.6498	-0.0006498	460.5	-0.6404	-0.0006404	460.5	-0.6205	-0.0006205	460.5	-0.6204	-0.0006204	460.5	-0.6029	-0.0006029		460.5	-0.7009	-0.0007009	460.5	-0.6542	-0.0006542	460.5	-0.6439	-0.0006439	460.5	-0.6362	-0.0006362	460.5	-0.632	-0.000632	460.5	-0.6288	-0.0006288		460.5	-0.7009	-0.0007009	460.5	-0.647	-0.000647	460.5	-0.6376	-0.0006376	460.5	-0.6253
	461	-0.7009	-0.0007009	461	-0.6498	-0.0006498	461	-0.6404	-0.0006404	461	-0.6205	-0.0006205	461	-0.6204	-0.0006204	461	-0.6029	-0.0006029		461	-0.7009	-0.0007009	461	-0.6542	-0.0006542	461	-0.6438	-0.0006438	461	-0.6362	-0.0006362	461	-0.6319	-0.0006319	461	-0.6288	-0.0006288		461	-0.7009	-0.0007009	461	-0.647	-0.000647	461	-0.6376	-0.0006376	461	-0.6253
	461.5	-0.7008	-0.0007008	461.5	-0.6498	-0.0006498	461.5	-0.6404	-0.0006404	461.5	-0.6205	-0.0006205	461.5	-0.6205	-0.0006205	461.5	-0.603	-0.000603		461.5	-0.7008	-0.0007008	461.5	-0.6542	-0.0006542	461.5	-0.6439	-0.0006439	461.5	-0.6362	-0.0006362	461.5	-0.6319	-0.0006319	461.5	-0.6288	-0.0006288		461.5	-0.7008	-0.0007008	461.5	-0.647	-0.000647	461.5	-0.6376	-0.0006376	461.5	-0.6253
	462.1	-0.7008	-0.0007008	462.1	-0.6498	-0.0006498	462.1	-0.6404	-0.0006404	462.1	-0.6205	-0.0006205	462.1	-0.6205	-0.0006205	462.1	-0.603	-0.000603		462.1	-0.7008	-0.0007008	462.1	-0.6542	-0.0006542	462.1	-0.6439	-0.0006439	462.1	-0.6362	-0.0006362	462.1	-0.6319	-0.0006319	462.1	-0.6288	-0.0006288		462.1	-0.7008	-0.0007008	462.1	-0.647	-0.000647	462.1	-0.6376	-0.0006376	462.1	-0.6253
	462.6	-0.7008	-0.0007008	462.6	-0.6498	-0.0006498	462.6	-0.6404	-0.0006404	462.6	-0.6205	-0.0006205	462.6	-0.6205	-0.0006205	462.6	-0.603	-0.000603		462.6	-0.7008	-0.0007008	462.6	-0.6541	-0.0006541	462.6	-0.6439	-0.0006439	462.6	-0.6362	-0.0006362	462.6	-0.6319	-0.0006319	462.6	-0.6288	-0.0006288		462.6	-0.7008	-0.0007008	462.6	-0.6471	-0.0006471	462.6	-0.6376	-0.0006376	462.6	-0.6253
	463.1	-0.7007	-0.0007007	463.1	-0.6498	-0.0006498	463.1	-0.6404	-0.0006404	463.1	-0.6206	-0.0006206	463.1	-0.6205	-0.0006205	463.1	-0.603	-0.000603		463.1	-0.7007	-0.0007007	463.1	-0.6541	-0.0006541	463.1	-0.6439	-0.0006439	463.1	-0.6362	-0.0006362	463.1	-0.6319	-0.0006319	463.1	-0.6288	-0.0006288		463.1	-0.7007	-0.0007007	463.1	-0.6471	-0.0006471	463.1	-0.6376	-0.0006376	463.1	-0.6253
	463.6	-0.7007	-0.0007007	463.6	-0.6498	-0.0006498	463.6	-0.6404	-0.0006404	463.6	-0.6206	-0.0006206	463.6	-0.6205	-0.0006205	463.6	-0.603	-0.000603		463.6	-0.7007	-0.0007007	463.6	-0.6541	-0.0006541	463.6	-0.6438	-0.0006438	463.6	-0.6362	-0.0006362	463.6	-0.6319	-0.0006319	463.6	-0.6288	-0.0006288		463.6	-0.7007	-0.0007007	463.6	-0.6471	-0.0006471	463.6	-0.6376	-0.0006376	463.6	-0.6253
	464.1	-0.7007	-0.0007007	464.1	-0.6498	-0.0006498	464.1	-0.6404	-0.0006404	464.1	-0.6206	-0.0006206	464.1	-0.6205	-0.0006205	464.1	-0.603	-0.000603		464.1	-0.7007	-0.0007007	464.1	-0.6541	-0.0006541	464.1	-0.6438	-0.0006438	464.1	-0.6361	-0.0006361	464.1	-0.6319	-0.0006319	464.1	-0.6288	-0.0006288		464.1	-0.7007	-0.0007007	464.1	-0.6471	-0.0006471	464.1	-0.6376	-0.0006376	464.1	-0.6253
	464.6	-0.7006	-0.0007006	464.6	-0.6498	-0.0006498	464.6	-0.6404	-0.0006404	464.6	-0.6206	-0.0006206	464.6	-0.6206	-0.0006206	464.6	-0.603	-0.000603		464.6	-0.7006	-0.0007006	464.6	-0.6541	-0.0006541	464.6	-0.6438	-0.0006438	464.6	-0.6361	-0.0006361	464.6	-0.6319	-0.0006319	464.6	-0.6288	-0.0006288		464.6	-0.7006	-0.0007006	464.6	-0.6471	-0.0006471	464.6	-0.6376	-0.0006376	464.6	-0.6253
	465.1	-0.7006	-0.0007006	465.1	-0.6498	-0.0006498	465.1	-0.6404	-0.0006404	465.1	-0.6206	-0.0006206	465.1	-0.6206	-0.0006206	465.1	-0.6031	-0.0006031		465.1	-0.7006	-0.0007006	465.1	-0.6541	-0.0006541	465.1	-0.6438	-0.0006438	465.1	-0.6361	-0.0006361	465.1	-0.6319	-0.0006319	465.1	-0.6288	-0.0006288		465.1	-0.7006	-0.0007006	465.1	-0.6471	-0.0006471	465.1	-0.6376	-0.0006376	465.1	-0.6253
	465.6	-0.7006	-0.0007006	465.6	-0.6498	-0.0006498	465.6	-0.6404	-0.0006404	465.6	-0.6206	-0.0006206	465.6	-0.6206	-0.0006206	465.6	-0.6031	-0.0006031		465.6	-0.7006	-0.0007006	465.6	-0.6541	-0.0006541	465.6	-0.6438	-0.0006438	465.6	-0.6361	-0.0006361	465.6	-0.6319	-0.0006319	465.6	-0.6288	-0.0006288		465.6	-0.7006	-0.0007006	465.6	-0.6471	-0.0006471	465.6	-0.6376	-0.0006376	465.6	-0.6252
	466.1	-0.7005	-0.0007005	466.1	-0.6498	-0.0006498	466.1	-0.6404	-0.0006404	466.1	-0.6206	-0.0006206	466.1	-0.6206	-0.0006206	466.1	-0.6031	-0.0006031		466.1	-0.7005	-0.0007005	466.1	-0.6541	-0.0006541	466.1	-0.6438	-0.0006438	466.1	-0.6361	-0.0006361	466.1	-0.6319	-0.0006319	466.1	-0.6288	-0.0006288		466.1	-0.7005	-0.0007005	466.1	-0.6471	-0.0006471	466.1	-0.6376	-0.0006376	466.1	-0.6252
	466.6	-0.7005	-0.0007005	466.6	-0.6498	-0.0006498	466.6	-0.6404	-0.0006404	466.6	-0.6207	-0.0006207	466.6	-0.6206	-0.0006206	466.6	-0.6031	-0.0006031		466.6	-0.7005	-0.0007005	466.6	-0.6541	-0.0006541	466.6	-0.6438	-0.0006438	466.6	-0.6361	-0.0006361	466.6	-0.6319	-0.0006319	466.6	-0.6288	-0.0006288		466.6	-0.7005	-0.0007005	466.6	-0.6471	-0.0006471	466.6	-0.6376	-0.0006376	466.6	-0.6252
	467.2	-0.7005	-0.0007005	467.2	-0.6499	-0.0006499	467.2	-0.6404	-0.0006404	467.2	-0.6207	-0.0006207	467.2	-0.6206	-0.0006206	467.2	-0.6031	-0.0006031		467.2	-0.7005	-0.0007005	467.2	-0.6541	-0.0006541	467.2	-0.6438	-0.0006438	467.2	-0.6361	-0.0006361	467.2	-0.6319	-0.0006319	467.2	-0.6288	-0.0006288		467.2	-0.7005	-0.0007005	467.2	-0.6471	-0.0006471	467.2	-0.6376	-0.0006376	467.2	-0.6252
	467.7	-0.7005	-0.0007005	467.7	-0.6499	-0.0006499	467.7	-0.6404	-0.0006404	467.7	-0.6207	-0.0006207	467.7	-0.6207	-0.0006207	467.7	-0.6031	-0.0006031		467.7	-0.7005	-0.0007005	467.7	-0.6541	-0.0006541	467.7	-0.6438	-0.0006438	467.7	-0.6361	-0.0006361	467.7	-0.6319	-0.0006319	467.7	-0.6288	-0.0006288		467.7	-0.7005	-0.0007005	467.7	-0.6471	-0.0006471	467.7	-0.6376	-0.0006376	467.7	-0.6253
	468.2	-0.7004	-0.0007004	468.2	-0.6499	-0.0006499	468.2	-0.6404	-0.0006404	468.2	-0.6207	-0.0006207	468.2	-0.6207	-0.0006207	468.2	-0.6031	-0.0006031		468.2	-0.7004	-0.0007004	468.2	-0.6541	-0.0006541	468.2	-0.6438	-0.0006438	468.2	-0.6361	-0.0006361	468.2	-0.6319	-0.0006319	468.2	-0.6288	-0.0006288		468.2	-0.7004	-0.0007004	468.2	-0.6471	-0.0006471	468.2	-0.6376	-0.0006376	468.2	-0.6252
	468.7	-0.7004	-0.0007004	468.7	-0.6499	-0.0006499	468.7	-0.6404	-0.0006404	468.7	-0.6208	-0.0006208	468.7	-0.6207	-0.0006207	468.7	-0.6032	-0.0006032		468.7	-0.7004	-0.0007004	468.7	-0.654	-0.000654	468.7	-0.6438	-0.0006438	468.7	-0.6361	-0.0006361	468.7	-0.6319	-0.0006319	468.7	-0.6288	-0.0006288		468.7	-0.7004	-0.0007004	468.7	-0.647	-0.000647	468.7	-0.6376	-0.0006376	468.7	-0.6252
	469.2	-0.7004	-0.0007004	469.2	-0.6499	-0.0006499	469.2	-0.6404	-0.0006404	469.2	-0.6208	-0.0006208	469.2	-0.6207	-0.0006207	469.2	-0.6032	-0.0006032		469.2	-0.7004	-0.0007004	469.2	-0.654	-0.000654	469.2	-0.6438	-0.0006438	469.2	-0.6361	-0.0006361	469.2	-0.6318	-0.0006318	469.2	-0.6288	-0.0006288		469.2	-0.7004	-0.0007004	469.2	-0.647	-0.000647	469.2	-0.6376	-0.0006376	469.2	-0.6252
	469.7	-0.7004	-0.0007004	469.7	-0.6499	-0.0006499	469.7	-0.6404	-0.0006404	469.7	-0.6208	-0.0006208	469.7	-0.6207	-0.0006207	469.7	-0.6032	-0.0006032		469.7	-0.7004	-0.0007004	469.7	-0.654	-0.000654	469.7	-0.6438	-0.0006438	469.7	-0.6361	-0.0006361	469.7	-0.6318	-0.0006318	469.7	-0.6288	-0.0006288		469.7	-0.7004	-0.0007004	469.7	-0.647	-0.000647	469.7	-0.6376	-0.0006376	469.7	-0.6252
	470.2	-0.7004	-0.0007004	470.2	-0.6499	-0.0006499	470.2	-0.6404	-0.0006404	470.2	-0.6208	-0.0006208	470.2	-0.6207	-0.0006207	470.2	-0.6032	-0.0006032		470.2	-0.7004	-0.0007004	470.2	-0.654	-0.000654	470.2	-0.6438	-0.0006438	470.2	-0.636	-0.000636	470.2	-0.6318	-0.0006318	470.2	-0.6288	-0.0006288		470.2	-0.7004	-0.0007004	470.2	-0.647	-0.000647	470.2	-0.6376	-0.0006376	470.2	-0.6252
	470.7	-0.7003	-0.0007003	470.7	-0.6499	-0.0006499	470.7	-0.6404	-0.0006404	470.7	-0.6208	-0.0006208	470.7	-0.6208	-0.0006208	470.7	-0.6032	-0.0006032		470.7	-0.7003	-0.0007003	470.7	-0.654	-0.000654	470.7	-0.6438	-0.0006438	470.7	-0.636	-0.000636	470.7	-0.6318	-0.0006318	470.7	-0.6288	-0.0006288		470.7	-0.7003	-0.0007003	470.7	-0.6471	-0.0006471	470.7	-0.6376	-0.0006376	470.7	-0.6252
	471.2	-0.7003	-0.0007003	471.2	-0.6499	-0.0006499	471.2	-0.6404	-0.0006404	471.2	-0.6209	-0.0006209	471.2	-0.6208	-0.0006208	471.2	-0.6032	-0.0006032		471.2	-0.7003	-0.0007003	471.2	-0.654	-0.000654	471.2	-0.6438	-0.0006438	471.2	-0.636	-0.000636	471.2	-0.6318	-0.0006318	471.2	-0.6288	-0.0006288		471.2	-0.7003	-0.0007003	471.2	-0.6471	-0.0006471	471.2	-0.6376	-0.0006376	471.2	-0.6252
	471.8	-0.7003	-0.0007003	471.8	-0.6499	-0.0006499	471.8	-0.6404	-0.0006404	471.8	-0.6209	-0.0006209	471.8	-0.6208	-0.0006208	471.8	-0.6032	-0.0006032		471.8	-0.7003	-0.0007003	471.8	-0.654	-0.000654	471.8	-0.6438	-0.0006438	471.8	-0.636	-0.000636	471.8	-0.6318	-0.0006318	471.8	-0.6288	-0.0006288		471.8	-0.7003	-0.0007003	471.8	-0.6471	-0.0006471	471.8	-0.6376	-0.0006376	471.8	-0.6252
	472.3	-0.7003	-0.0007003	472.3	-0.6499	-0.0006499	472.3	-0.6404	-0.0006404	472.3	-0.6209	-0.0006209	472.3	-0.6208	-0.0006208	472.3	-0.6032	-0.0006032		472.3	-0.7003	-0.0007003	472.3	-0.654	-0.000654	472.3	-0.6438	-0.0006438	472.3	-0.636	-0.000636	472.3	-0.6318	-0.0006318	472.3	-0.6288	-0.0006288		472.3	-0.7003	-0.0007003	472.3	-0.6471	-0.0006471	472.3	-0.6376	-0.0006376	472.3	-0.6252
	472.8	-0.7003	-0.0007003	472.8	-0.6499	-0.0006499	472.8	-0.6404	-0.0006404	472.8	-0.6209	-0.0006209	472.8	-0.6208	-0.0006208	472.8	-0.6033	-0.0006033		472.8	-0.7003	-0.0007003	472.8	-0.654	-0.000654	472.8	-0.6438	-0.0006438	472.8	-0.636	-0.000636	472.8	-0.6318	-0.0006318	472.8	-0.6288	-0.0006288		472.8	-0.7003	-0.0007003	472.8	-0.6471	-0.0006471	472.8	-0.6376	-0.0006376	472.8	-0.6252
	473.3	-0.7003	-0.0007003	473.3	-0.6499	-0.0006499	473.3	-0.6404	-0.0006404	473.3	-0.6209	-0.0006209	473.3	-0.6209	-0.0006209	473.3	-0.6033	-0.0006033		473.3	-0.7003	-0.0007003	473.3	-0.654	-0.000654	473.3	-0.6438	-0.0006438	473.3	-0.636	-0.000636	473.3	-0.6318	-0.0006318	473.3	-0.6288	-0.0006288		473.3	-0.7003	-0.0007003	473.3	-0.6471	-0.0006471	473.3	-0.6376	-0.0006376	473.3	-0.6252
	473.8	-0.7003	-0.0007003	473.8	-0.6499	-0.0006499	473.8	-0.6404	-0.0006404	473.8	-0.6209	-0.0006209	473.8	-0.6209	-0.0006209	473.8	-0.6033	-0.0006033		473.8	-0.7003	-0.0007003	473.8	-0.654	-0.000654	473.8	-0.6438	-0.0006438	473.8	-0.636	-0.000636	473.8	-0.6318	-0.0006318	473.8	-0.6288	-0.0006288		473.8	-0.7003	-0.0007003	473.8	-0.6471	-0.0006471	473.8	-0.6376	-0.0006376	473.8	-0.6252
	474.3	-0.7003	-0.0007003	474.3	-0.6499	-0.0006499	474.3	-0.6404	-0.0006404	474.3	-0.621	-0.000621	474.3	-0.6209	-0.0006209	474.3	-0.6033	-0.0006033		474.3	-0.7003	-0.0007003	474.3	-0.654	-0.000654	474.3	-0.6438	-0.0006438	474.3	-0.636	-0.000636	474.3	-0.6318	-0.0006318	474.3	-0.6288	-0.0006288		474.3	-0.7003	-0.0007003	474.3	-0.6471	-0.0006471	474.3	-0.6376	-0.0006376	474.3	-0.6252
	474.8	-0.7003	-0.0007003	474.8	-0.6499	-0.0006499	474.8	-0.6404	-0.0006404	474.8	-0.621	-0.000621	474.8	-0.6209	-0.0006209	474.8	-0.6033	-0.0006033		474.8	-0.7003	-0.0007003	474.8	-0.654	-0.000654	474.8	-0.6438	-0.0006438	474.8	-0.636	-0.000636	474.8	-0.6318	-0.0006318	474.8	-0.6288	-0.0006288		474.8	-0.7003	-0.0007003	474.8	-0.6471	-0.0006471	474.8	-0.6376	-0.0006376	474.8	-0.6252
	475.3	-0.7003	-0.0007003	475.3	-0.6499	-0.0006499	475.3	-0.6404	-0.0006404	475.3	-0.621	-0.000621	475.3	-0.6209	-0.0006209	475.3	-0.6033	-0.0006033		475.3	-0.7003	-0.0007003	475.3	-0.654	-0.000654	475.3	-0.6438	-0.0006438	475.3	-0.636	-0.000636	475.3	-0.6318	-0.0006318	475.3	-0.6288	-0.0006288		475.3	-0.7003	-0.0007003	475.3	-0.647	-0.000647	475.3	-0.6376	-0.0006376	475.3	-0.6252
	475.8	-0.7003	-0.0007003	475.8	-0.6499	-0.0006499	475.8	-0.6404	-0.0006404	475.8	-0.621	-0.000621	475.8	-0.621	-0.000621	475.8	-0.6033	-0.0006033		475.8	-0.7003	-0.0007003	475.8	-0.654	-0.000654	475.8	-0.6438	-0.0006438	475.8	-0.636	-0.000636	475.8	-0.6318	-0.0006318	475.8	-0.6288	-0.0006288		475.8	-0.7003	-0.0007003	475.8	-0.647	-0.000647	475.8	-0.6376	-0.0006376	475.8	-0.6251
	476.3	-0.7003	-0.0007003	476.3	-0.6499	-0.0006499	476.3	-0.6404	-0.0006404	476.3	-0.621	-0.000621	476.3	-0.621	-0.000621	476.3	-0.6034	-0.0006034		476.3	-0.7003	-0.0007003	476.3	-0.654	-0.000654	476.3	-0.6438	-0.0006438	476.3	-0.636	-0.000636	476.3	-0.6318	-0.0006318	476.3	-0.6288	-0.0006288		476.3	-0.7003	-0.0007003	476.3	-0.647	-0.000647	476.3	-0.6376	-0.0006376	476.3	-0.6251
	476.9	-0.7003	-0.0007003	476.9	-0.6499	-0.0006499	476.9	-0.6404	-0.0006404	476.9	-0.6211	-0.0006211	476.9	-0.621	-0.000621	476.9	-0.6034	-0.0006034		476.9	-0.7003	-0.0007003	476.9	-0.654	-0.000654	476.9	-0.6438	-0.0006438	476.9	-0.636	-0.000636	476.9	-0.6318	-0.0006318	476.9	-0.6288	-0.0006288		476.9	-0.7003	-0.0007003	476.9	-0.647	-0.000647	476.9	-0.6376	-0.0006376	476.9	-0.6251
	477.4	-0.7003	-0.0007003	477.4	-0.6499	-0.0006499	477.4	-0.6404	-0.0006404	477.4	-0.6211	-0.0006211	477.4	-0.621	-0.000621	477.4	-0.6034	-0.0006034		477.4	-0.7003	-0.0007003	477.4	-0.654	-0.000654	477.4	-0.6438	-0.0006438	477.4	-0.636	-0.000636	477.4	-0.6318	-0.0006318	477.4	-0.6288	-0.0006288		477.4	-0.7003	-0.0007003	477.4	-0.647	-0.000647	477.4	-0.6376	-0.0006376	477.4	-0.6251
	477.9	-0.7002	-0.0007002	477.9	-0.6499	-0.0006499	477.9	-0.6404	-0.0006404	477.9	-0.6211	-0.0006211	477.9	-0.621	-0.000621	477.9	-0.6034	-0.0006034		477.9	-0.7002	-0.0007002	477.9	-0.654	-0.000654	477.9	-0.6438	-0.0006438	477.9	-0.636	-0.000636	477.9	-0.6317	-0.0006317	477.9	-0.6288	-0.0006288		477.9	-0.7002	-0.0007002	477.9	-0.647	-0.000647	477.9	-0.6376	-0.0006376	477.9	-0.6251
	478.4	-0.7002	-0.0007002	478.4	-0.6499	-0.0006499	478.4	-0.6404	-0.0006404	478.4	-0.6212	-0.0006212	478.4	-0.621	-0.000621	478.4	-0.6034	-0.0006034		478.4	-0.7002	-0.0007002	478.4	-0.654	-0.000654	478.4	-0.6438	-0.0006438	478.4	-0.636	-0.000636	478.4	-0.6317	-0.0006317	478.4	-0.6288	-0.0006288		478.4	-0.7002	-0.0007002	478.4	-0.647	-0.000647	478.4	-0.6376	-0.0006376	478.4	-0.6251
	478.9	-0.7002	-0.0007002	478.9	-0.6499	-0.0006499	478.9	-0.6404	-0.0006404	478.9	-0.6212	-0.0006212	478.9	-0.6211	-0.0006211	478.9	-0.6034	-0.0006034		478.9	-0.7002	-0.0007002	478.9	-0.654	-0.000654	478.9	-0.6438	-0.0006438	478.9	-0.636	-0.000636	478.9	-0.6317	-0.0006317	478.9	-0.6288	-0.0006288		478.9	-0.7002	-0.0007002	478.9	-0.647	-0.000647	478.9	-0.6376	-0.0006376	478.9	-0.6251
	479.4	-0.7002	-0.0007002	479.4	-0.6499	-0.0006499	479.4	-0.6404	-0.0006404	479.4	-0.6212	-0.0006212	479.4	-0.6211	-0.0006211	479.4	-0.6034	-0.0006034		479.4	-0.7002	-0.0007002	479.4	-0.654	-0.000654	479.4	-0.6438	-0.0006438	479.4	-0.636	-0.000636	479.4	-0.6317	-0.0006317	479.4	-0.6288	-0.0006288		479.4	-0.7002	-0.0007002	479.4	-0.6471	-0.0006471	479.4	-0.6376	-0.0006376	479.4	-0.6251
	479.9	-0.7002	-0.0007002	479.9	-0.65	-0.00065	479.9	-0.6404	-0.0006404	479.9	-0.6212	-0.0006212	479.9	-0.6211	-0.0006211	479.9	-0.6034	-0.0006034		479.9	-0.7002	-0.0007002	479.9	-0.654	-0.000654	479.9	-0.6438	-0.0006438	479.9	-0.636	-0.000636	479.9	-0.6317	-0.0006317	479.9	-0.6288	-0.0006288		479.9	-0.7002	-0.0007002	479.9	-0.6471	-0.0006471	479.9	-0.6376	-0.0006376	479.9	-0.6251
	480.4	-0.7002	-0.0007002	480.4	-0.65	-0.00065	480.4	-0.6404	-0.0006404	480.4	-0.6212	-0.0006212	480.4	-0.6211	-0.0006211	480.4	-0.6034	-0.0006034		480.4	-0.7002	-0.0007002	480.4	-0.654	-0.000654	480.4	-0.6438	-0.0006438	480.4	-0.636	-0.000636	480.4	-0.6317	-0.0006317	480.4	-0.6288	-0.0006288		480.4	-0.7002	-0.0007002	480.4	-0.6471	-0.0006471	480.4	-0.6376	-0.0006376	480.4	-0.6251
	480.9	-0.7001	-0.0007001	480.9	-0.65	-0.00065	480.9	-0.6404	-0.0006404	480.9	-0.6212	-0.0006212	480.9	-0.6211	-0.0006211	480.9	-0.6034	-0.0006034		480.9	-0.7001	-0.0007001	480.9	-0.654	-0.000654	480.9	-0.6438	-0.0006438	480.9	-0.6359	-0.0006359	480.9	-0.6317	-0.0006317	480.9	-0.6288	-0.0006288		480.9	-0.7001	-0.0007001	480.9	-0.6472	-0.0006472	480.9	-0.6376	-0.0006376	480.9	-0.6251
	481.4	-0.7001	-0.0007001	481.4	-0.65	-0.00065	481.4	-0.6404	-0.0006404	481.4	-0.6212	-0.0006212	481.4	-0.6211	-0.0006211	481.4	-0.6035	-0.0006035		481.4	-0.7001	-0.0007001	481.4	-0.654	-0.000654	481.4	-0.6438	-0.0006438	481.4	-0.6359	-0.0006359	481.4	-0.6317	-0.0006317	481.4	-0.6288	-0.0006288		481.4	-0.7001	-0.0007001	481.4	-0.6472	-0.0006472	481.4	-0.6376	-0.0006376	481.4	-0.625
	482	-0.7001	-0.0007001	482	-0.65	-0.00065	482	-0.6404	-0.0006404	482	-0.6212	-0.0006212	482	-0.6212	-0.0006212	482	-0.6035	-0.0006035		482	-0.7001	-0.0007001	482	-0.654	-0.000654	482	-0.6438	-0.0006438	482	-0.6359	-0.0006359	482	-0.6317	-0.0006317	482	-0.6288	-0.0006288		482	-0.7001	-0.0007001	482	-0.6472	-0.0006472	482	-0.6376	-0.0006376	482	-0.625
	482.5	-0.7001	-0.0007001	482.5	-0.65	-0.00065	482.5	-0.6404	-0.0006404	482.5	-0.6212	-0.0006212	482.5	-0.6212	-0.0006212	482.5	-0.6035	-0.0006035		482.5	-0.7001	-0.0007001	482.5	-0.6539	-0.0006539	482.5	-0.6438	-0.0006438	482.5	-0.6359	-0.0006359	482.5	-0.6317	-0.0006317	482.5	-0.6288	-0.0006288		482.5	-0.7001	-0.0007001	482.5	-0.6472	-0.0006472	482.5	-0.6376	-0.0006376	482.5	-0.625
	483	-0.7001	-0.0007001	483	-0.65	-0.00065	483	-0.6404	-0.0006404	483	-0.6212	-0.0006212	483	-0.6212	-0.0006212	483	-0.6035	-0.0006035		483	-0.7001	-0.0007001	483	-0.6539	-0.0006539	483	-0.6438	-0.0006438	483	-0.6359	-0.0006359	483	-0.6317	-0.0006317	483	-0.6288	-0.0006288		483	-0.7001	-0.0007001	483	-0.6472	-0.0006472	483	-0.6376	-0.0006376	483	-0.625
	483.5	-0.7001	-0.0007001	483.5	-0.65	-0.00065	483.5	-0.6404	-0.0006404	483.5	-0.6212	-0.0006212	483.5	-0.6212	-0.0006212	483.5	-0.6035	-0.0006035		483.5	-0.7001	-0.0007001	483.5	-0.6539	-0.0006539	483.5	-0.6438	-0.0006438	483.5	-0.6359	-0.0006359	483.5	-0.6317	-0.0006317	483.5	-0.6288	-0.0006288		483.5	-0.7001	-0.0007001	483.5	-0.6472	-0.0006472	483.5	-0.6376	-0.0006376	483.5	-0.625
	484	-0.7001	-0.0007001	484	-0.65	-0.00065	484	-0.6404	-0.0006404	484	-0.6212	-0.0006212	484	-0.6212	-0.0006212	484	-0.6035	-0.0006035		484	-0.7001	-0.0007001	484	-0.6539	-0.0006539	484	-0.6438	-0.0006438	484	-0.6359	-0.0006359	484	-0.6317	-0.0006317	484	-0.6288	-0.0006288		484	-0.7001	-0.0007001	484	-0.6472	-0.0006472	484	-0.6376	-0.0006376	484	-0.625
	484.5	-0.7	-0.0007	484.5	-0.65	-0.00065	484.5	-0.6404	-0.0006404	484.5	-0.6213	-0.0006213	484.5	-0.6212	-0.0006212	484.5	-0.6035	-0.0006035		484.5	-0.7	-0.0007	484.5	-0.6539	-0.0006539	484.5	-0.6438	-0.0006438	484.5	-0.6359	-0.0006359	484.5	-0.6317	-0.0006317	484.5	-0.6288	-0.0006288		484.5	-0.7	-0.0007	484.5	-0.6472	-0.0006472	484.5	-0.6376	-0.0006376	484.5	-0.625
	485	-0.7	-0.0007	485	-0.65	-0.00065	485	-0.6405	-0.0006405	485	-0.6213	-0.0006213	485	-0.6212	-0.0006212	485	-0.6035	-0.0006035		485	-0.7	-0.0007	485	-0.6539	-0.0006539	485	-0.6438	-0.0006438	485	-0.6359	-0.0006359	485	-0.6317	-0.0006317	485	-0.6288	-0.0006288		485	-0.7	-0.0007	485	-0.6473	-0.0006473	485	-0.6376	-0.0006376	485	-0.625
	485.5	-0.7	-0.0007	485.5	-0.65	-0.00065	485.5	-0.6405	-0.0006405	485.5	-0.6213	-0.0006213	485.5	-0.6213	-0.0006213	485.5	-0.6036	-0.0006036		485.5	-0.7	-0.0007	485.5	-0.6539	-0.0006539	485.5	-0.6438	-0.0006438	485.5	-0.6359	-0.0006359	485.5	-0.6317	-0.0006317	485.5	-0.6288	-0.0006288		485.5	-0.7	-0.0007	485.5	-0.6473	-0.0006473	485.5	-0.6376	-0.0006376	485.5	-0.625
	486	-0.7	-0.0007	486	-0.65	-0.00065	486	-0.6405	-0.0006405	486	-0.6213	-0.0006213	486	-0.6213	-0.0006213	486	-0.6036	-0.0006036		486	-0.7	-0.0007	486	-0.6539	-0.0006539	486	-0.6438	-0.0006438	486	-0.6359	-0.0006359	486	-0.6317	-0.0006317	486	-0.6288	-0.0006288		486	-0.7	-0.0007	486	-0.6473	-0.0006473	486	-0.6376	-0.0006376	486	-0.625
	486.5	-0.7	-0.0007	486.5	-0.65	-0.00065	486.5	-0.6405	-0.0006405	486.5	-0.6213	-0.0006213	486.5	-0.6213	-0.0006213	486.5	-0.6036	-0.0006036		486.5	-0.7	-0.0007	486.5	-0.6538	-0.0006538	486.5	-0.6438	-0.0006438	486.5	-0.6359	-0.0006359	486.5	-0.6317	-0.0006317	486.5	-0.6288	-0.0006288		486.5	-0.7	-0.0007	486.5	-0.6473	-0.0006473	486.5	-0.6376	-0.0006376	486.5	-0.625
	487	-0.6999	-0.0006999	487	-0.65	-0.00065	487	-0.6405	-0.0006405	487	-0.6213	-0.0006213	487	-0.6213	-0.0006213	487	-0.6036	-0.0006036		487	-0.6999	-0.0006999	487	-0.6538	-0.0006538	487	-0.6438	-0.0006438	487	-0.6359	-0.0006359	487	-0.6317	-0.0006317	487	-0.6288	-0.0006288		487	-0.6999	-0.0006999	487	-0.6473	-0.0006473	487	-0.6376	-0.0006376	487	-0.625
	487.6	-0.6999	-0.0006999	487.6	-0.65	-0.00065	487.6	-0.6405	-0.0006405	487.6	-0.6214	-0.0006214	487.6	-0.6213	-0.0006213	487.6	-0.6036	-0.0006036		487.6	-0.6999	-0.0006999	487.6	-0.6538	-0.0006538	487.6	-0.6438	-0.0006438	487.6	-0.6359	-0.0006359	487.6	-0.6317	-0.0006317	487.6	-0.6288	-0.0006288		487.6	-0.6999	-0.0006999	487.6	-0.6473	-0.0006473	487.6	-0.6376	-0.0006376	487.6	-0.625
	488.1	-0.6999	-0.0006999	488.1	-0.65	-0.00065	488.1	-0.6405	-0.0006405	488.1	-0.6214	-0.0006214	488.1	-0.6213	-0.0006213	488.1	-0.6036	-0.0006036		488.1	-0.6999	-0.0006999	488.1	-0.6538	-0.0006538	488.1	-0.6438	-0.0006438	488.1	-0.6359	-0.0006359	488.1	-0.6317	-0.0006317	488.1	-0.6288	-0.0006288		488.1	-0.6999	-0.0006999	488.1	-0.6473	-0.0006473	488.1	-0.6376	-0.0006376	488.1	-0.625
	488.6	-0.6999	-0.0006999	488.6	-0.65	-0.00065	488.6	-0.6405	-0.0006405	488.6	-0.6214	-0.0006214	488.6	-0.6213	-0.0006213	488.6	-0.6036	-0.0006036		488.6	-0.6999	-0.0006999	488.6	-0.6538	-0.0006538	488.6	-0.6438	-0.0006438	488.6	-0.6359	-0.0006359	488.6	-0.6317	-0.0006317	488.6	-0.6288	-0.0006288		488.6	-0.6999	-0.0006999	488.6	-0.6473	-0.0006473	488.6	-0.6376	-0.0006376	488.6	-0.625
	489.1	-0.6999	-0.0006999	489.1	-0.6501	-0.0006501	489.1	-0.6405	-0.0006405	489.1	-0.6214	-0.0006214	489.1	-0.6214	-0.0006214	489.1	-0.6036	-0.0006036		489.1	-0.6999	-0.0006999	489.1	-0.6538	-0.0006538	489.1	-0.6438	-0.0006438	489.1	-0.6359	-0.0006359	489.1	-0.6317	-0.0006317	489.1	-0.6288	-0.0006288		489.1	-0.6999	-0.0006999	489.1	-0.6473	-0.0006473	489.1	-0.6376	-0.0006376	489.1	-0.625
	489.6	-0.6999	-0.0006999	489.6	-0.6501	-0.0006501	489.6	-0.6405	-0.0006405	489.6	-0.6214	-0.0006214	489.6	-0.6214	-0.0006214	489.6	-0.6036	-0.0006036		489.6	-0.6999	-0.0006999	489.6	-0.6537	-0.0006537	489.6	-0.6438	-0.0006438	489.6	-0.6358	-0.0006358	489.6	-0.6317	-0.0006317	489.6	-0.6288	-0.0006288		489.6	-0.6999	-0.0006999	489.6	-0.6473	-0.0006473	489.6	-0.6376	-0.0006376	489.6	-0.625
	490.1	-0.6998	-0.0006998	490.1	-0.6501	-0.0006501	490.1	-0.6405	-0.0006405	490.1	-0.6214	-0.0006214	490.1	-0.6214	-0.0006214	490.1	-0.6037	-0.0006037		490.1	-0.6998	-0.0006998	490.1	-0.6537	-0.0006537	490.1	-0.6438	-0.0006438	490.1	-0.6358	-0.0006358	490.1	-0.6317	-0.0006317	490.1	-0.6288	-0.0006288		490.1	-0.6998	-0.0006998	490.1	-0.6473	-0.0006473	490.1	-0.6376	-0.0006376	490.1	-0.625
	490.6	-0.6998	-0.0006998	490.6	-0.6501	-0.0006501	490.6	-0.6404	-0.0006404	490.6	-0.6214	-0.0006214	490.6	-0.6214	-0.0006214	490.6	-0.6037	-0.0006037		490.6	-0.6998	-0.0006998	490.6	-0.6537	-0.0006537	490.6	-0.6438	-0.0006438	490.6	-0.6358	-0.0006358	490.6	-0.6317	-0.0006317	490.6	-0.6288	-0.0006288		490.6	-0.6998	-0.0006998	490.6	-0.6473	-0.0006473	490.6	-0.6376	-0.0006376	490.6	-0.625
	491.1	-0.6998	-0.0006998	491.1	-0.6501	-0.0006501	491.1	-0.6404	-0.0006404	491.1	-0.6214	-0.0006214	491.1	-0.6214	-0.0006214	491.1	-0.6037	-0.0006037		491.1	-0.6998	-0.0006998	491.1	-0.6537	-0.0006537	491.1	-0.6438	-0.0006438	491.1	-0.6358	-0.0006358	491.1	-0.6317	-0.0006317	491.1	-0.6288	-0.0006288		491.1	-0.6998	-0.0006998	491.1	-0.6473	-0.0006473	491.1	-0.6376	-0.0006376	491.1	-0.625
	491.6	-0.6998	-0.0006998	491.6	-0.6501	-0.0006501	491.6	-0.6404	-0.0006404	491.6	-0.6214	-0.0006214	491.6	-0.6214	-0.0006214	491.6	-0.6037	-0.0006037		491.6	-0.6998	-0.0006998	491.6	-0.6537	-0.0006537	491.6	-0.6438	-0.0006438	491.6	-0.6358	-0.0006358	491.6	-0.6317	-0.0006317	491.6	-0.6288	-0.0006288		491.6	-0.6998	-0.0006998	491.6	-0.6473	-0.0006473	491.6	-0.6376	-0.0006376	491.6	-0.625
	492.1	-0.6997	-0.0006997	492.1	-0.6501	-0.0006501	492.1	-0.6404	-0.0006404	492.1	-0.6214	-0.0006214	492.1	-0.6215	-0.0006215	492.1	-0.6037	-0.0006037		492.1	-0.6997	-0.0006997	492.1	-0.6537	-0.0006537	492.1	-0.6438	-0.0006438	492.1	-0.6358	-0.0006358	492.1	-0.6317	-0.0006317	492.1	-0.6288	-0.0006288		492.1	-0.6997	-0.0006997	492.1	-0.6473	-0.0006473	492.1	-0.6376	-0.0006376	492.1	-0.625
	492.7	-0.6997	-0.0006997	492.7	-0.6501	-0.0006501	492.7	-0.6404	-0.0006404	492.7	-0.6214	-0.0006214	492.7	-0.6215	-0.0006215	492.7	-0.6037	-0.0006037		492.7	-0.6997	-0.0006997	492.7	-0.6537	-0.0006537	492.7	-0.6438	-0.0006438	492.7	-0.6358	-0.0006358	492.7	-0.6317	-0.0006317	492.7	-0.6288	-0.0006288		492.7	-0.6997	-0.0006997	492.7	-0.6473	-0.0006473	492.7	-0.6376	-0.0006376	492.7	-0.625
	493.2	-0.6997	-0.0006997	493.2	-0.6501	-0.0006501	493.2	-0.6404	-0.0006404	493.2	-0.6214	-0.0006214	493.2	-0.6215	-0.0006215	493.2	-0.6037	-0.0006037		493.2	-0.6997	-0.0006997	493.2	-0.6537	-0.0006537	493.2	-0.6438	-0.0006438	493.2	-0.6358	-0.0006358	493.2	-0.6317	-0.0006317	493.2	-0.6288	-0.0006288		493.2	-0.6997	-0.0006997	493.2	-0.6473	-0.0006473	493.2	-0.6376	-0.0006376	493.2	-0.625
	493.7	-0.6997	-0.0006997	493.7	-0.6501	-0.0006501	493.7	-0.6404	-0.0006404	493.7	-0.6215	-0.0006215	493.7	-0.6215	-0.0006215	493.7	-0.6037	-0.0006037		493.7	-0.6997	-0.0006997	493.7	-0.6537	-0.0006537	493.7	-0.6438	-0.0006438	493.7	-0.6358	-0.0006358	493.7	-0.6317	-0.0006317	493.7	-0.6288	-0.0006288		493.7	-0.6997	-0.0006997	493.7	-0.6473	-0.0006473	493.7	-0.6375	-0.0006375	493.7	-0.6249
	494.2	-0.6997	-0.0006997	494.2	-0.6501	-0.0006501	494.2	-0.6404	-0.0006404	494.2	-0.6215	-0.0006215	494.2	-0.6215	-0.0006215	494.2	-0.6037	-0.0006037		494.2	-0.6997	-0.0006997	494.2	-0.6537	-0.0006537	494.2	-0.6438	-0.0006438	494.2	-0.6358	-0.0006358	494.2	-0.6317	-0.0006317	494.2	-0.6288	-0.0006288		494.2	-0.6997	-0.0006997	494.2	-0.6473	-0.0006473	494.2	-0.6375	-0.0006375	494.2	-0.6249
	494.7	-0.6996	-0.0006996	494.7	-0.6501	-0.0006501	494.7	-0.6404	-0.0006404	494.7	-0.6215	-0.0006215	494.7	-0.6215	-0.0006215	494.7	-0.6038	-0.0006038		494.7	-0.6996	-0.0006996	494.7	-0.6537	-0.0006537	494.7	-0.6437	-0.0006437	494.7	-0.6358	-0.0006358	494.7	-0.6317	-0.0006317	494.7	-0.6288	-0.0006288		494.7	-0.6996	-0.0006996	494.7	-0.6473	-0.0006473	494.7	-0.6375	-0.0006375	494.7	-0.6249
	495.2	-0.6996	-0.0006996	495.2	-0.6501	-0.0006501	495.2	-0.6404	-0.0006404	495.2	-0.6215	-0.0006215	495.2	-0.6215	-0.0006215	495.2	-0.6038	-0.0006038		495.2	-0.6996	-0.0006996	495.2	-0.6537	-0.0006537	495.2	-0.6437	-0.0006437	495.2	-0.6358	-0.0006358	495.2	-0.6317	-0.0006317	495.2	-0.6288	-0.0006288		495.2	-0.6996	-0.0006996	495.2	-0.6473	-0.0006473	495.2	-0.6375	-0.0006375	495.2	-0.6249
	495.7	-0.6996	-0.0006996	495.7	-0.6501	-0.0006501	495.7	-0.6404	-0.0006404	495.7	-0.6215	-0.0006215	495.7	-0.6216	-0.0006216	495.7	-0.6038	-0.0006038		495.7	-0.6996	-0.0006996	495.7	-0.6537	-0.0006537	495.7	-0.6437	-0.0006437	495.7	-0.6358	-0.0006358	495.7	-0.6317	-0.0006317	495.7	-0.6288	-0.0006288		495.7	-0.6996	-0.0006996	495.7	-0.6473	-0.0006473	495.7	-0.6375	-0.0006375	495.7	-0.6249
[truncated: 2,557 more rows]
[truncated: 7 more columns]

## Sheet: Table S7
										Table S7. PDP curves for mild steel strips in 1.0 M HCl solution with and without the synthesized organic inhibitors (M1-M3) Figure 7 (M1=7a, M2=7b and M3=7c)
	M1																			M2																			M3
	0.1mM			0.2mM			0.3mM			0.4mM			0.5mM			0.0mM				0.1mM			0.2mM			0.3mM			0.4mM			0.5mM			0.0mM				0.1mM			0.2mM			0.3mM			0.4mM
[truncated: 1,004 more rows]
[truncated: 7 more columns]

## Sheet: Table S8
												Table S8. Nyquist plots for mild steel in 1.0 M HCl containing different concentrations of organic inhibitors (M1-M3) Figure 8 (M1=8a, M2=8b, and M3=8c).
[truncated: 69 more rows]
[truncated: 8 more columns]

[truncated: 2 more sheets: Table S9, Table S11]
