# Supplementary material
Source: Royal Society of Chemistry journal article supplement (doi:10.1039/d6ma00114a)
Supplement: d6ma00114a3.pdf [file d6ma00114a3.pdf]

**Enhanced anticorrosion performance of Antipyrine Derivatives on Mild Steel in an Acidic Environment: An Experimental and Theoretical Analysis**

Adil Afaq,<sup>a,b</sup> Muhammad Aamir,<sup>a\*</sup> Shahid Aziz,<sup>a\*</sup> Simon Woodward,<sup>b</sup> Muhammad Haroon,<sup>c</sup> Zaroon Sajid,<sup>a</sup> Md. Akhtaruzzaman,<sup>\*d</sup> Md. Shahiduzzaman,<sup>e</sup> Qamar Wali<sup>f,g</sup>, Jean-Michel Nunzi<sup>\*e,h</sup> and It Ee lee<sup>f,g\*</sup>

<sup>a</sup> Materials Laboratory, Department of Chemistry, Mirpur University of Science and Technology (MUST), Mirpur-10250 (AJK), Pakistan

<sup>b</sup> GSK, Carbon Neutral Laboratories for Sustainable Chemistry, University of Nottingham, Jubilee Campus, 6 Triumph Rd, Lenton, Nottingham NG7 2GT, United Kingdom

<sup>c</sup> Department of Chemistry and Biochemistry, Miami University, 651 E. High Street, Oxford, Ohio 45056, USA

<sup>d</sup> Department of Mechanical Engineering, Faculty of Engineering, Islamic University of Madinah, Madinah 42351, Saudi Arabia

<sup>e</sup> Nanomaterials Research Institute, Kanazawa University, Kakuma, Kanazawa 920-1192, Japan

<sup>f</sup> Faculty of Artificial Intelligence and Engineering, Multimedia University, 63100 Cyberjaya, Malaysia

<sup>g</sup> Centre for Smart Systems and Automation, Multimedia University, 63100 Cyberjaya, Malaysia

<sup>h</sup> Department of Physics, Engineering Physics and Astronomy, Queen's University, Kingston, Ontario K7L-3N6, Canada

Email: [amir.chem@must.edu.pk](mailto:amir.chem@must.edu.pk); [drshahid.chem@must.edu.pk](mailto:drshahid.chem@must.edu.pk); [akhtar.brces@gmail.com](mailto:akhtar.brces@gmail.com); [nunzijm@queensu.ca](mailto:nunzijm@queensu.ca); [ielee@mmu.edu.my](mailto:ielee@mmu.edu.my)

## Supporting Information

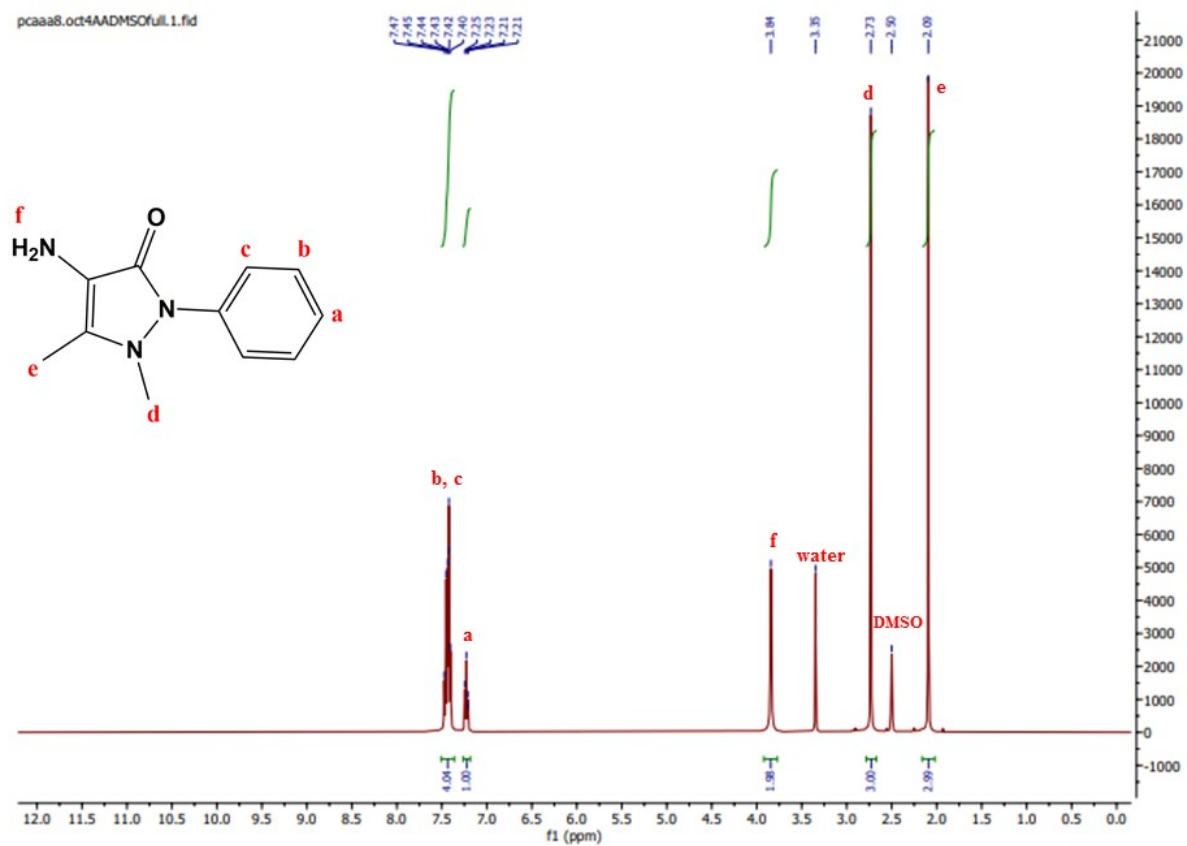

Figure S1: <sup>1</sup>H-NMR spectrum of 2.

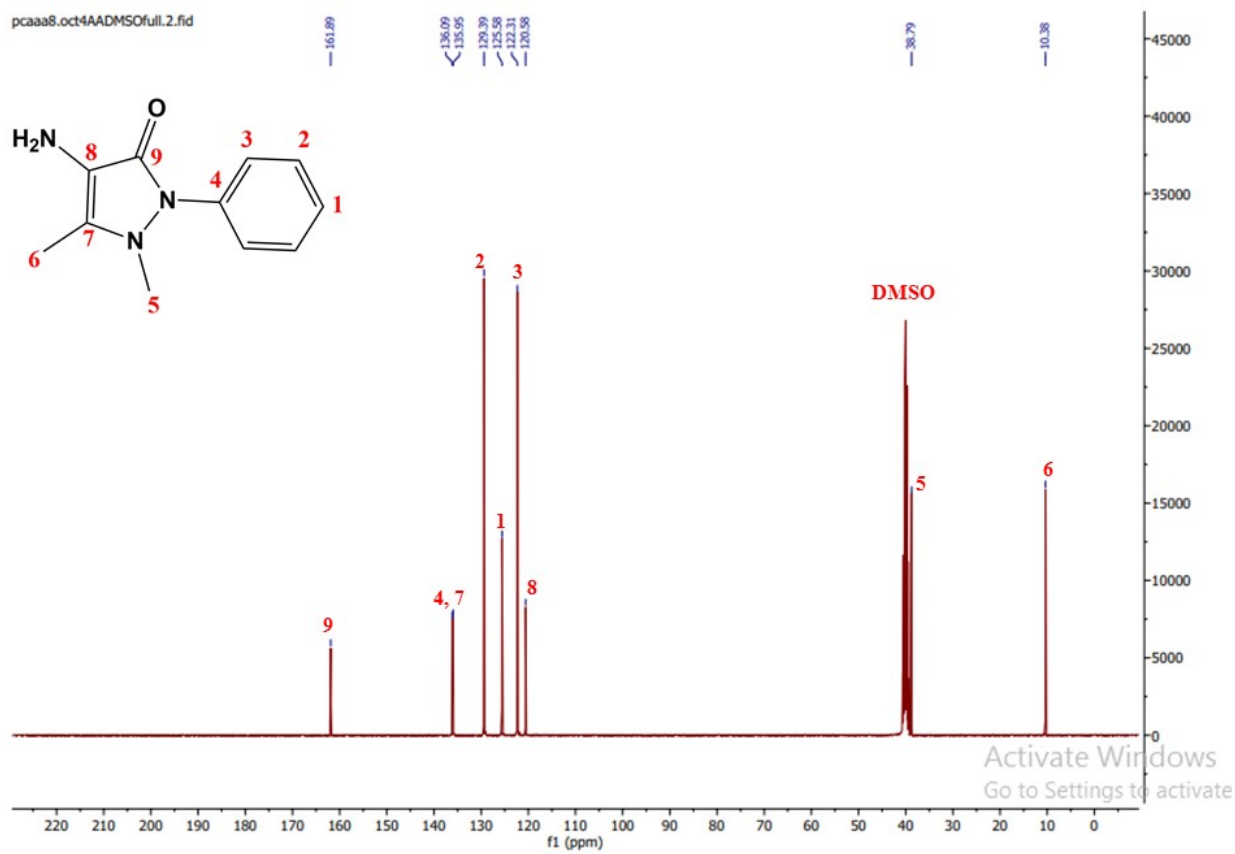

Figure S2: <sup>13</sup>C-NMR spectrum of 2.

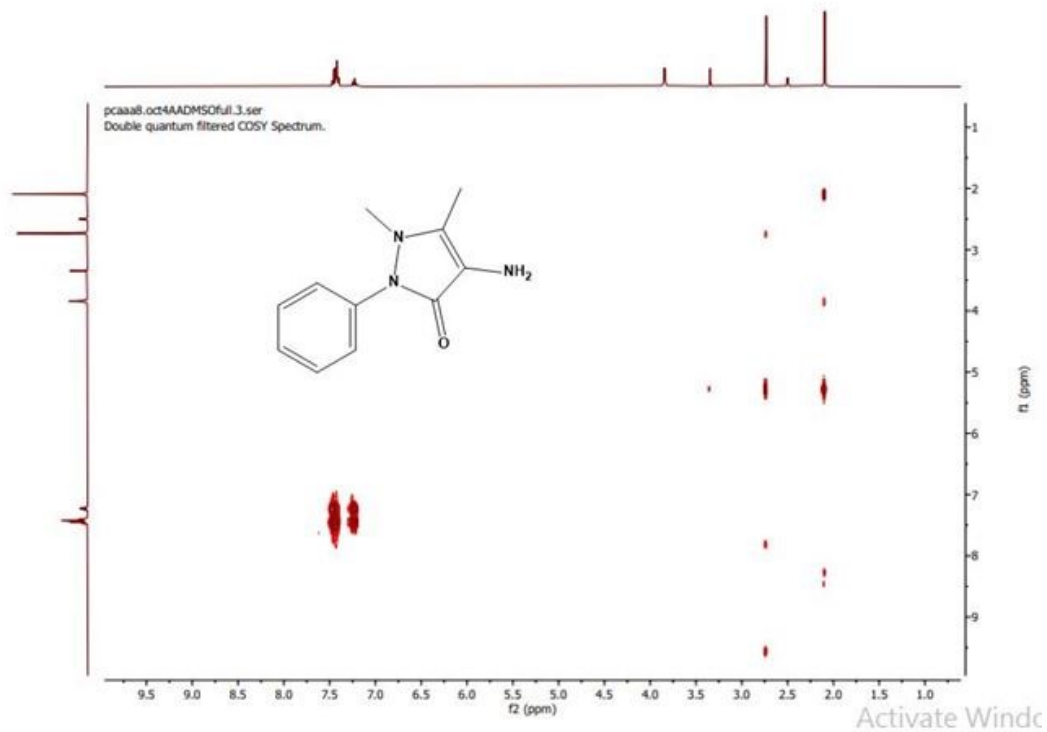

**Figure S3:** COSY spectrum of 2.

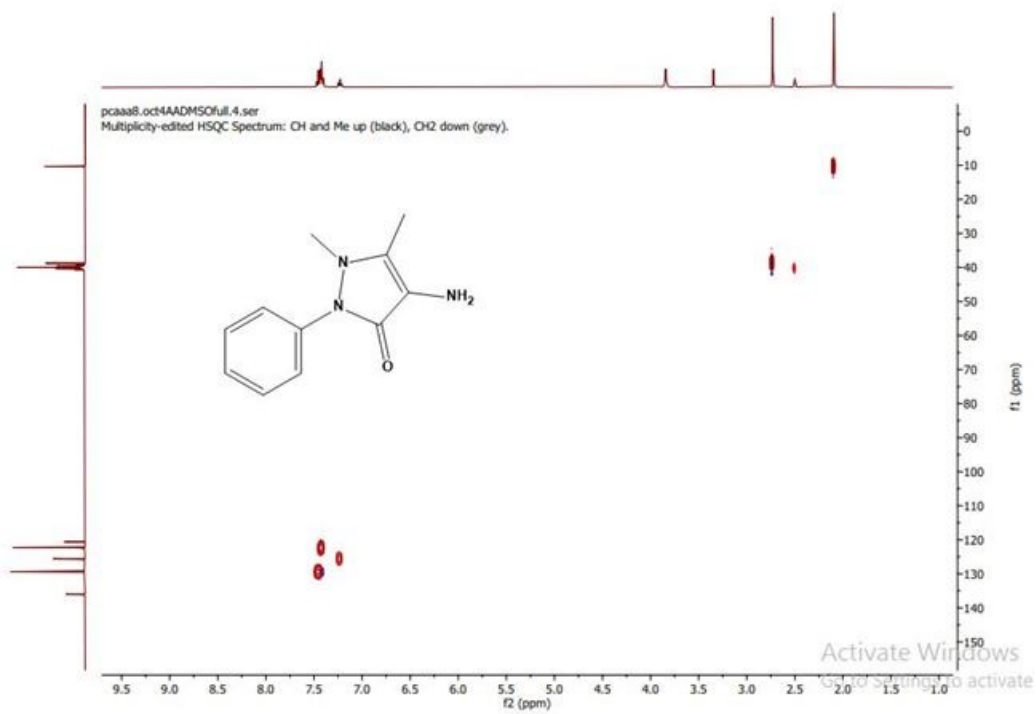

**Figure S4:** HSQC spectrum of 2.

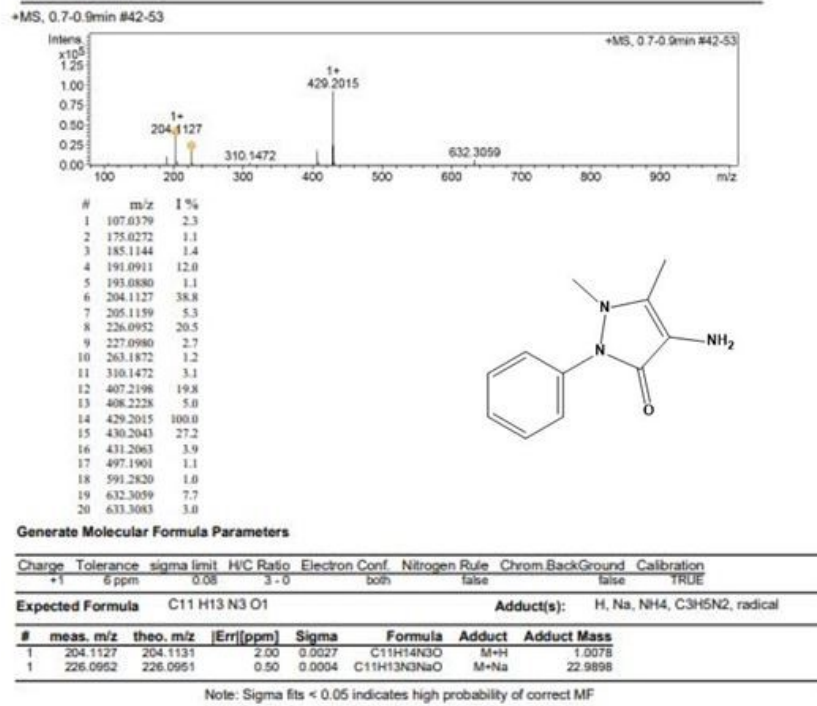

Figure S5: HRMS spectrum of 2.

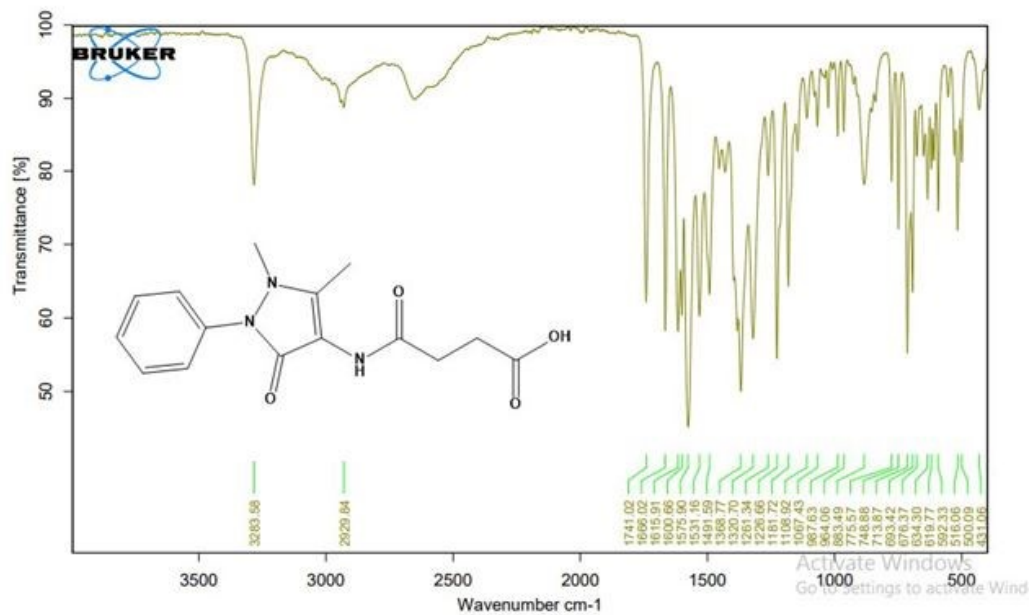

Figure S6: IR spectrum of 4.

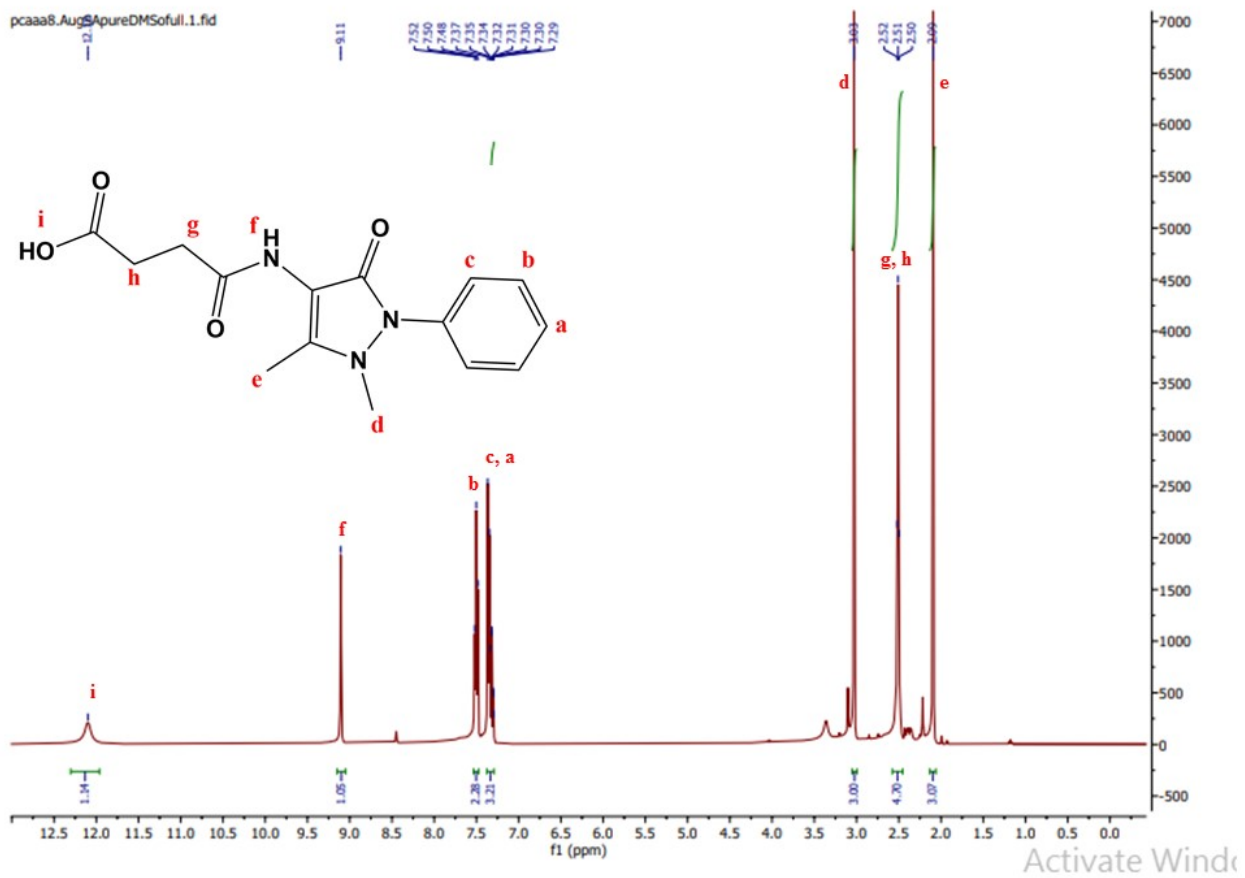

Figure S7: <sup>1</sup>H-NMR spectrum of 4.

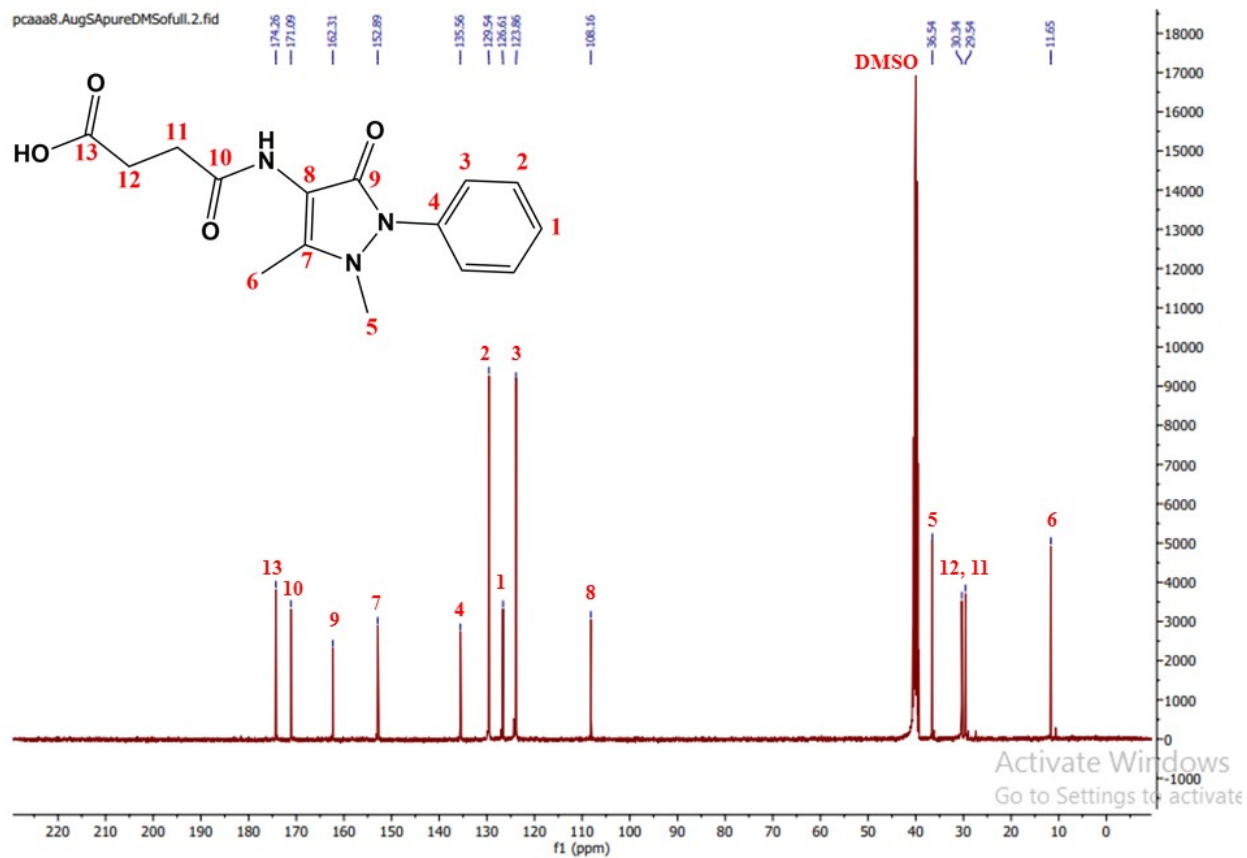

Figure S8:  $^{13}\text{C}$ -NMR spectrum of 4.

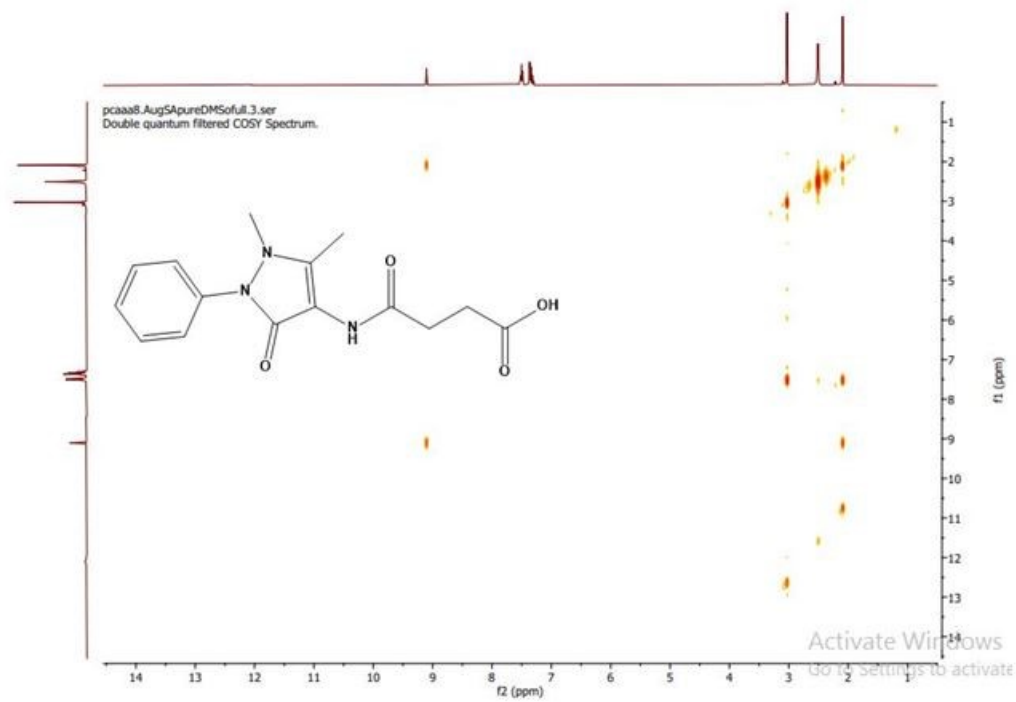

**Figure S9:** COSY spectrum of 4.

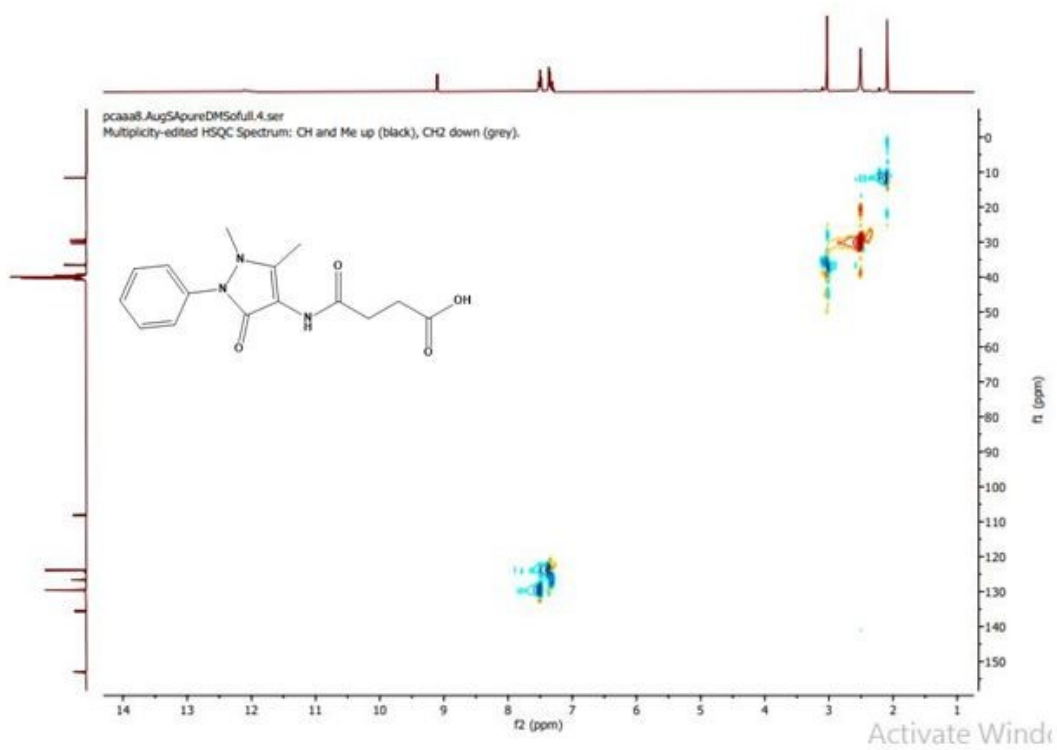

**Figure S10:** HSQC spectrum of 4.

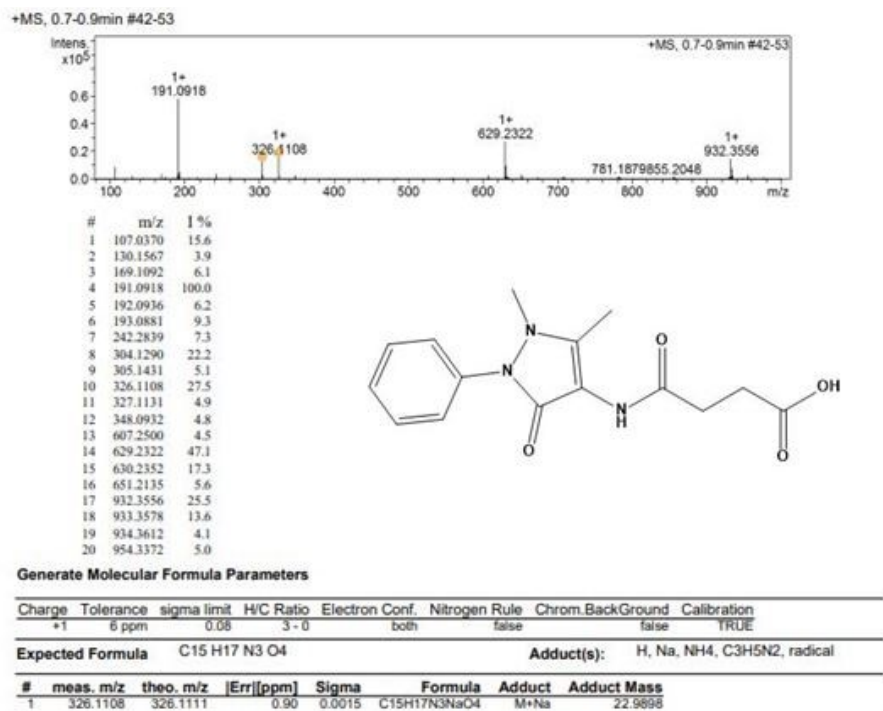

Figure S11: HRMS Positive spectrum of 4.

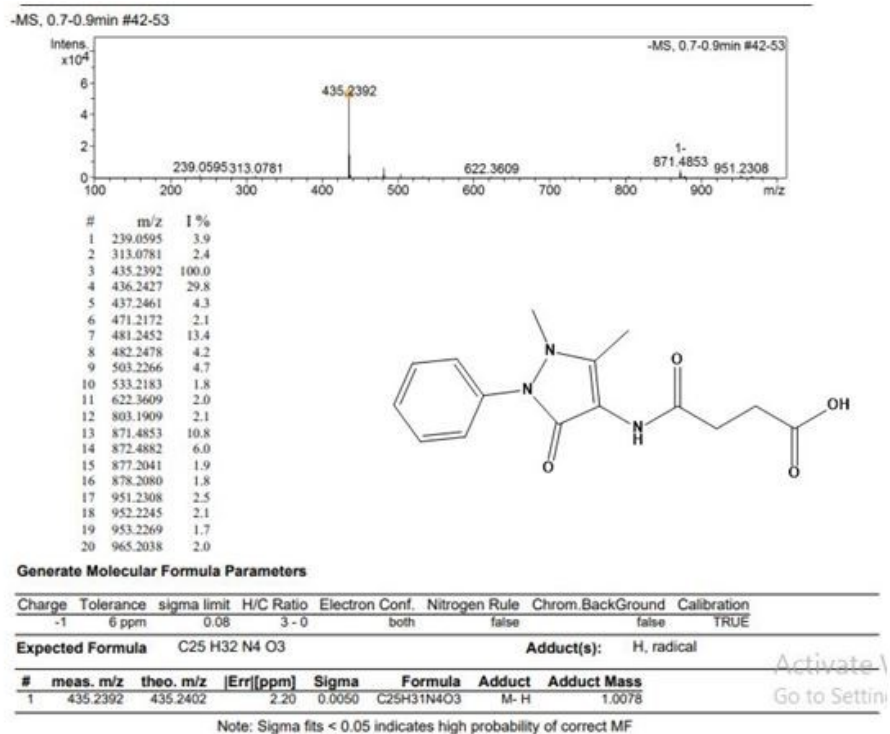

Figure S12: HRMS Negative spectrum of 4.

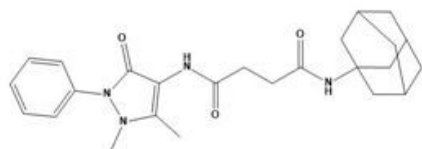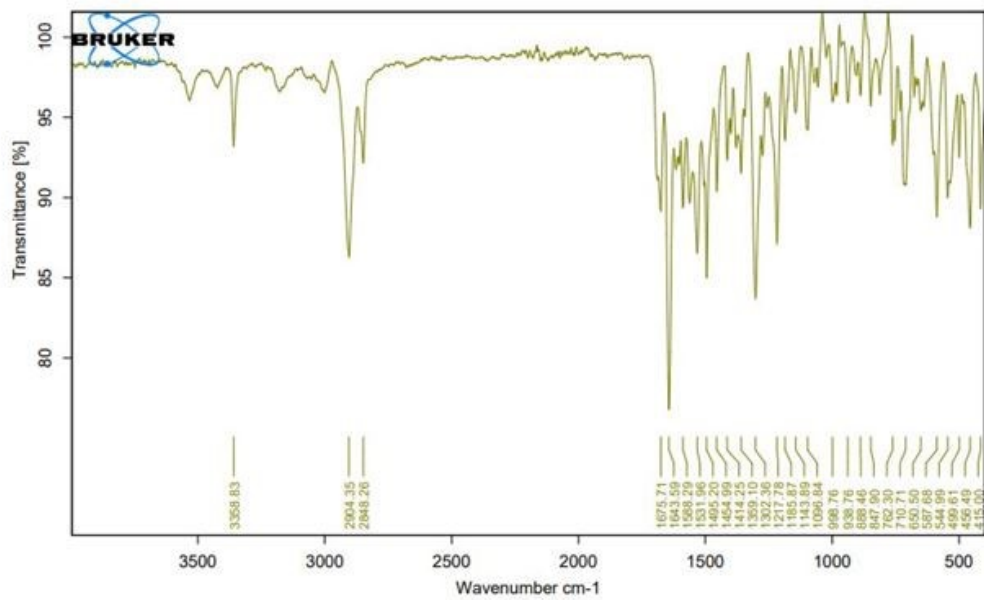

Figure S13: IR spectrum of M1.

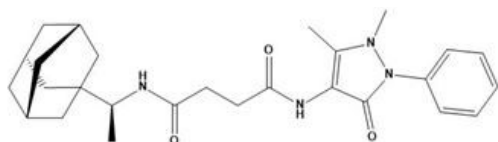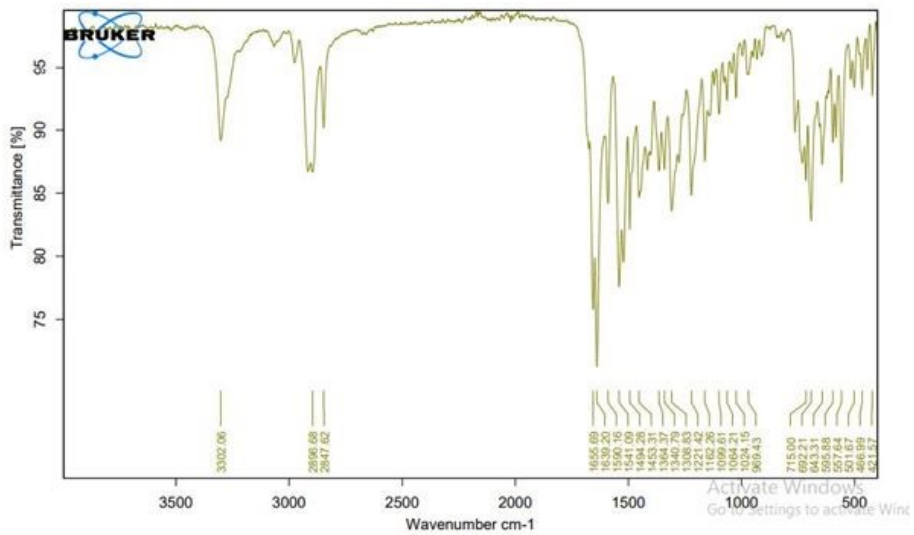

Figure S14: IR spectrum of M2.

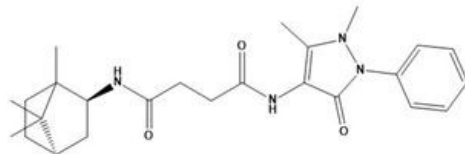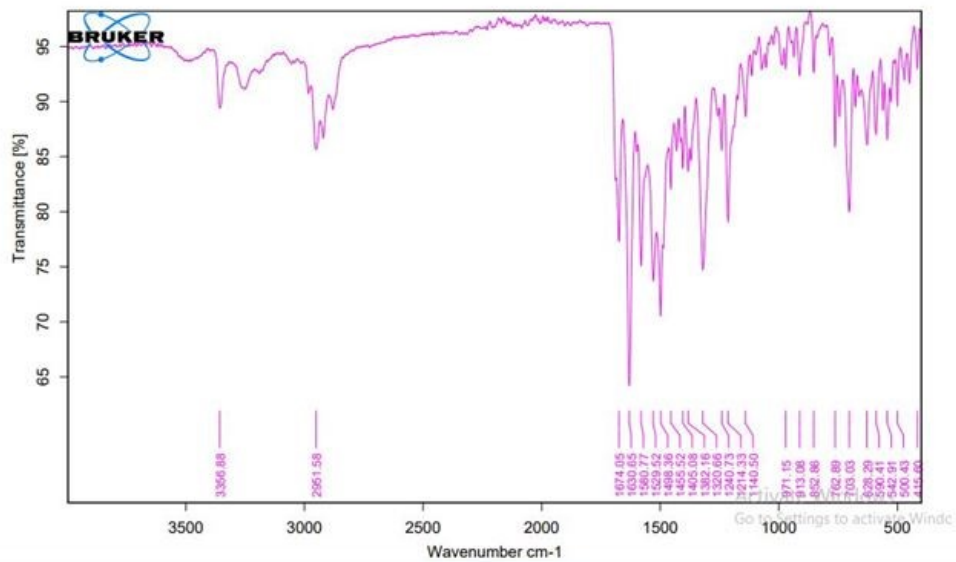

Figure S15: IR spectrum of M3.

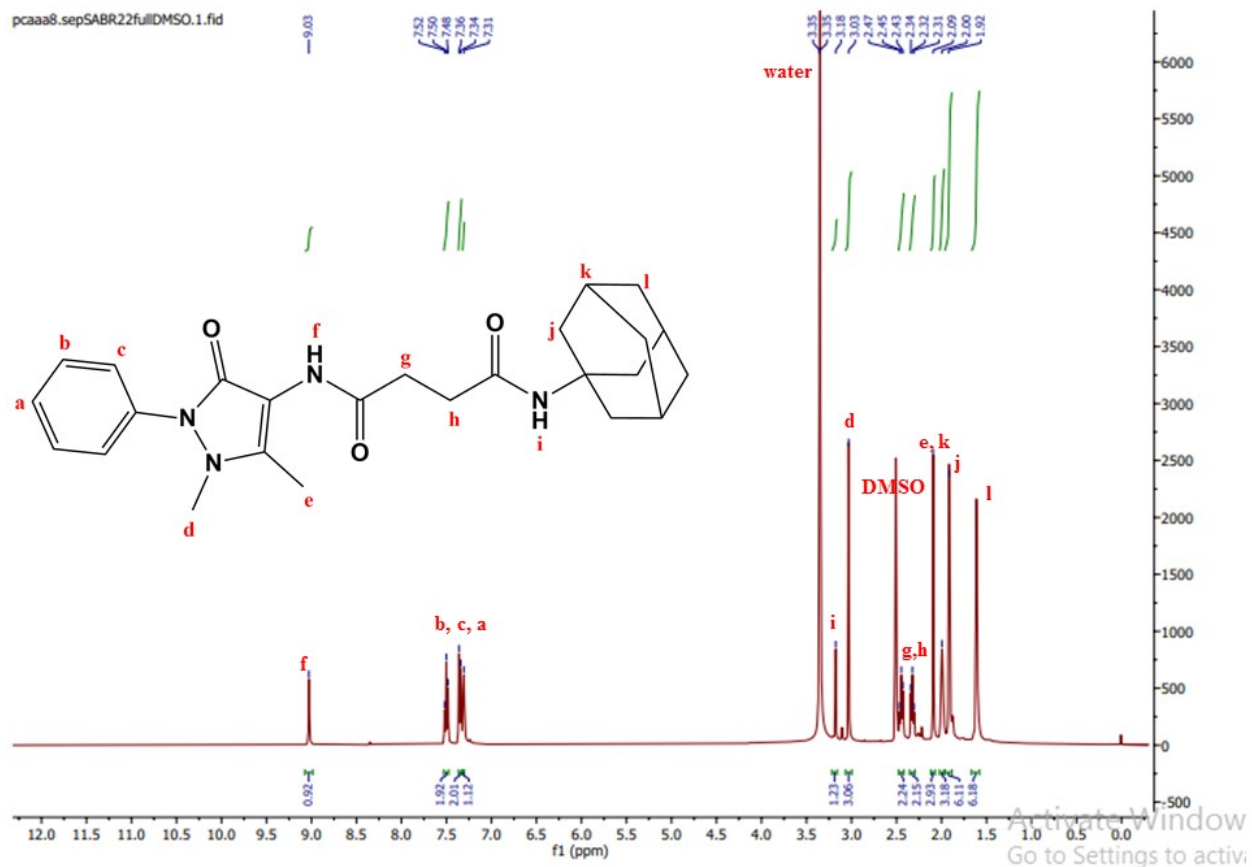

Figure S16:  $^1\text{H}$ -NMR spectrum of M1.

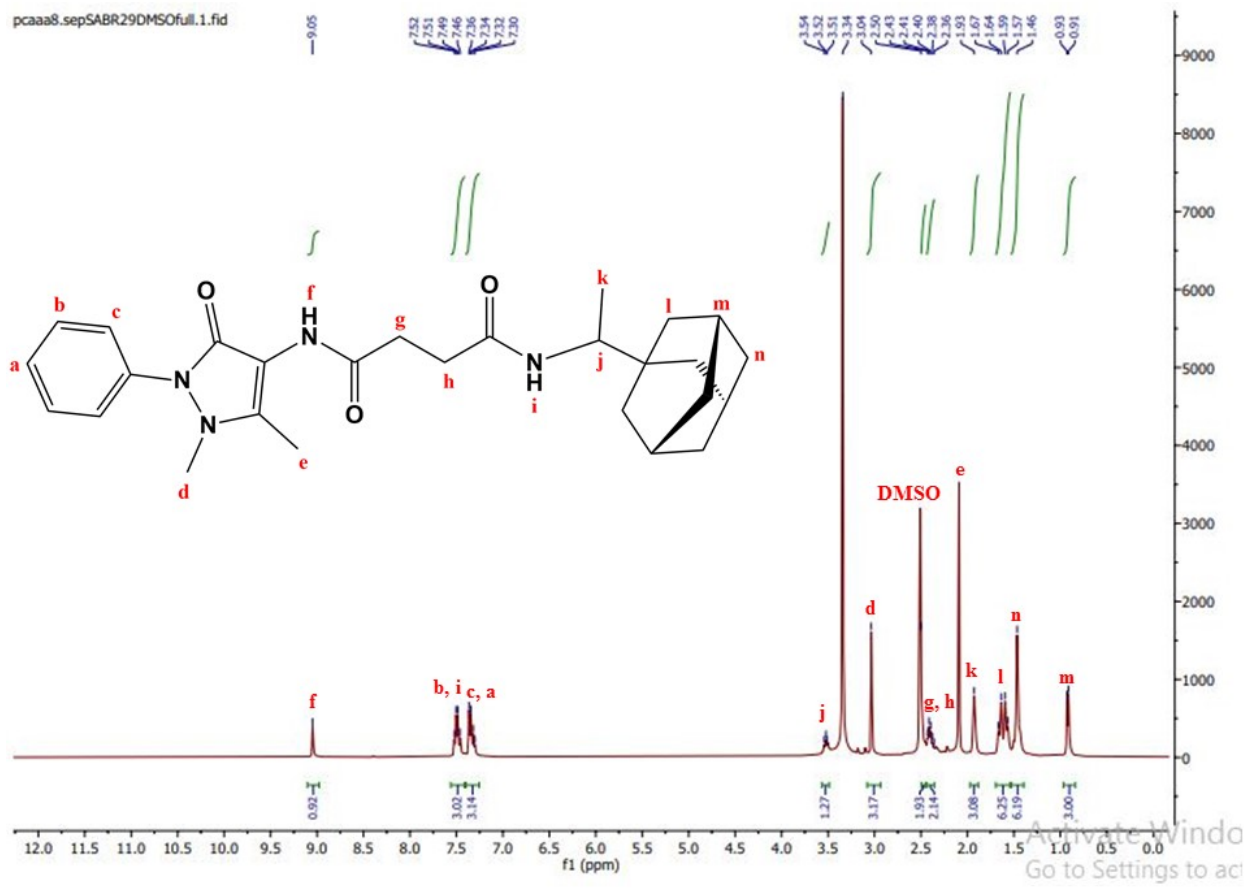

Figure S17: <sup>1</sup>H-NMR spectrum of M2.

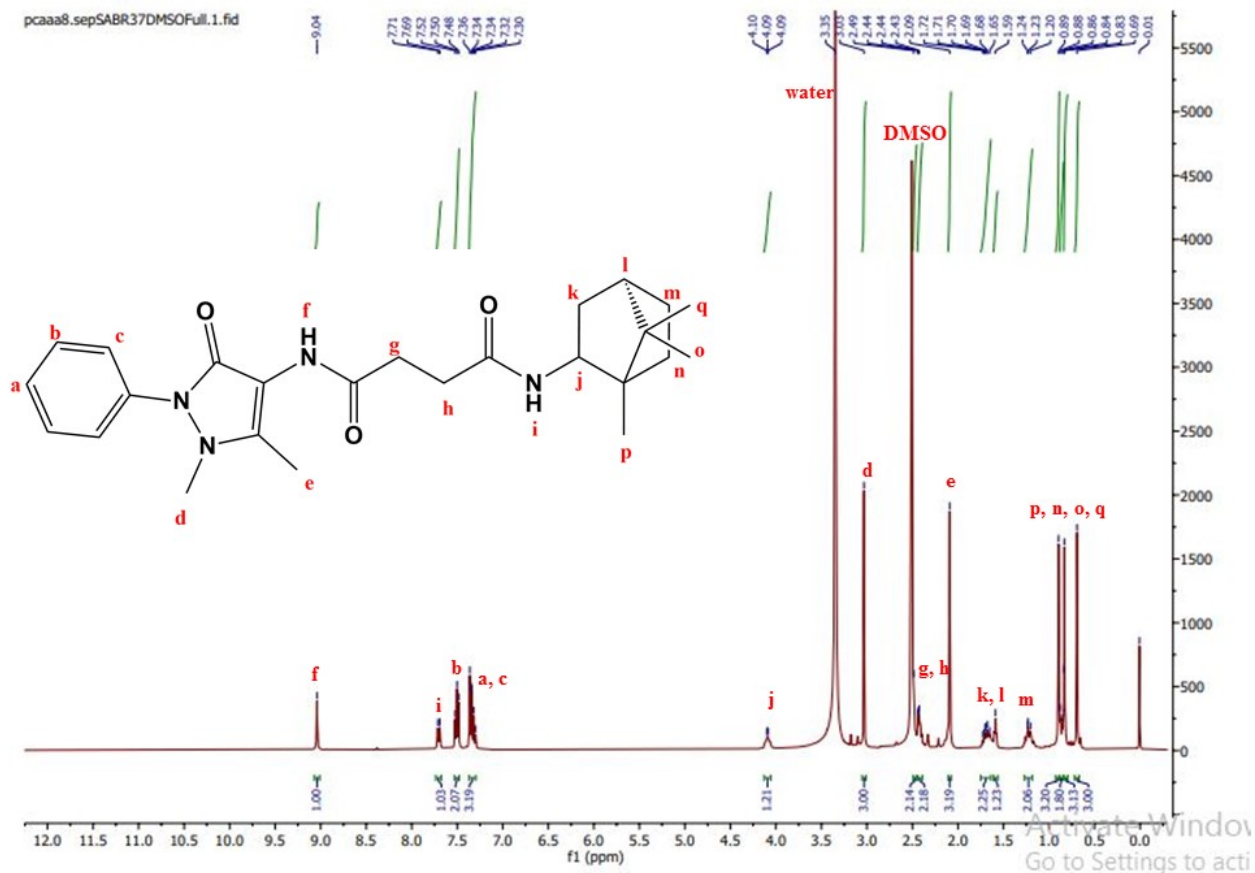

Figure S18:  $^1\text{H-NMR}$  spectrum of M3.

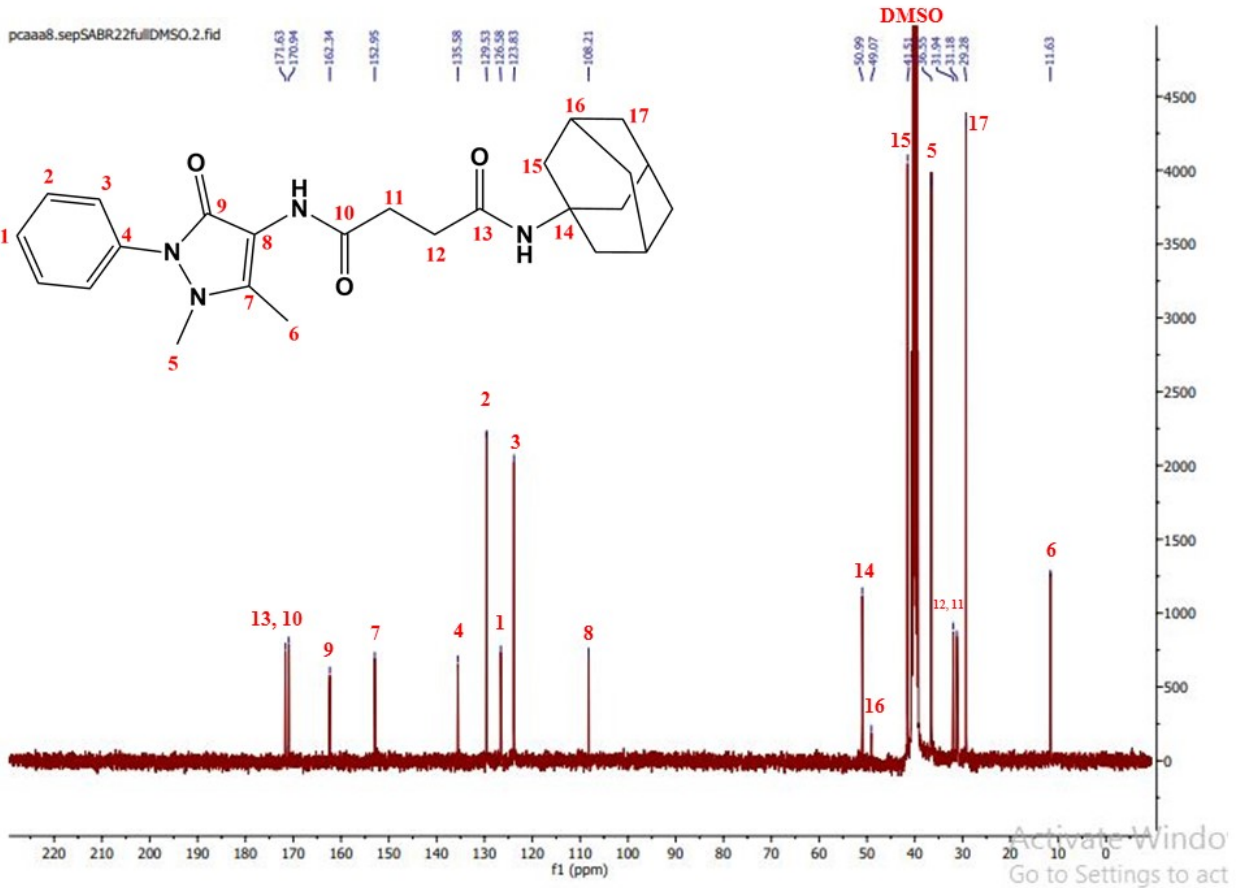

**Figure S19:**  $^{13}\text{C}$ -NMR spectrum of M1.

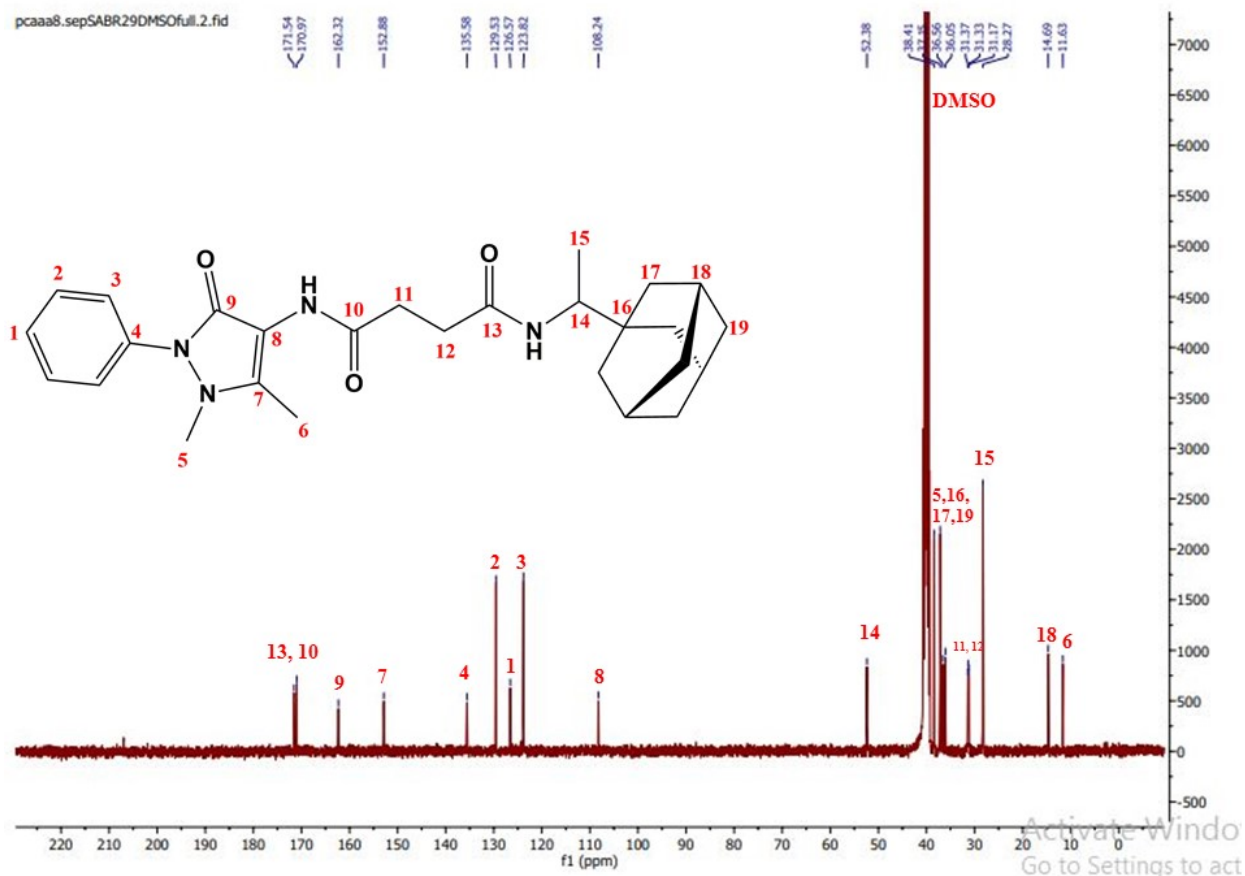

Figure S20:  $^{13}\text{C}$ -NMR spectrum of M2.

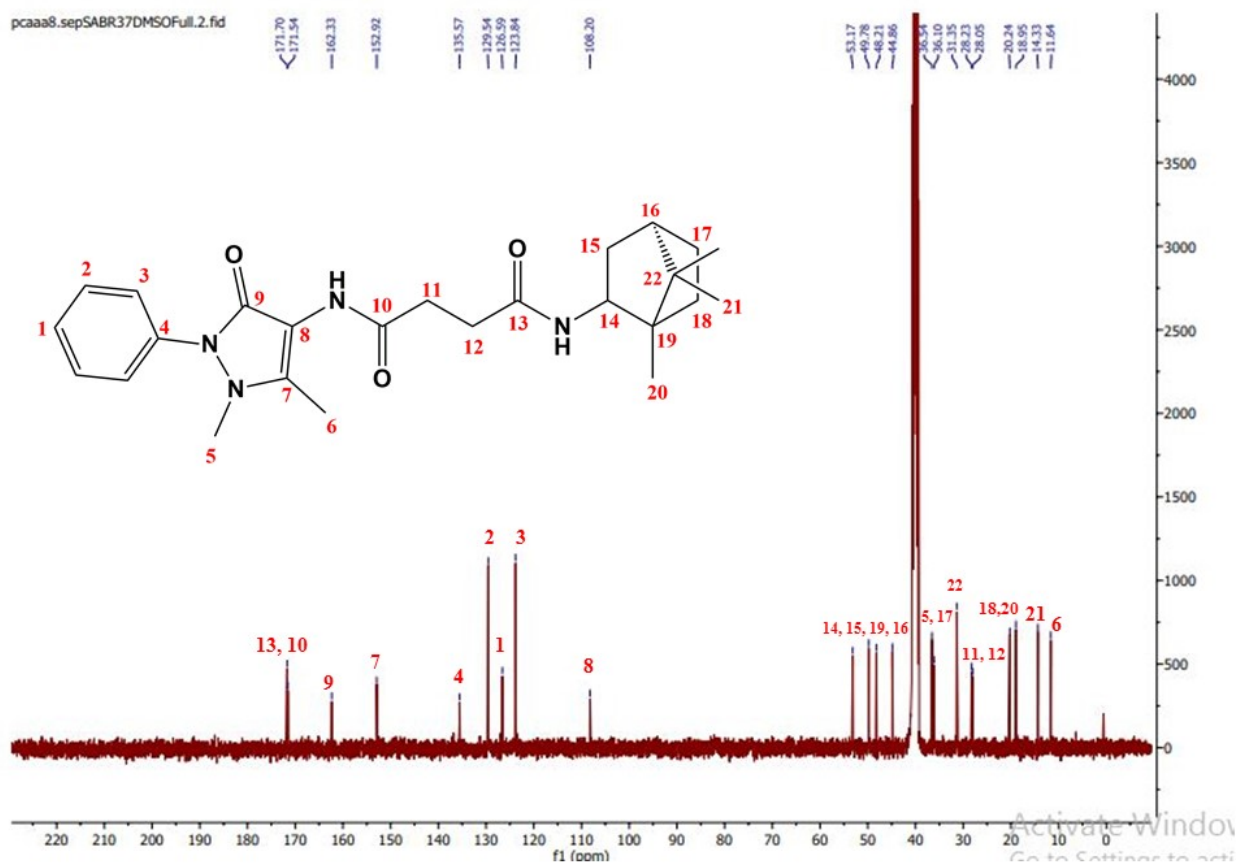

Figure S21:  $^{13}\text{C}$ -NMR spectrum of M3.

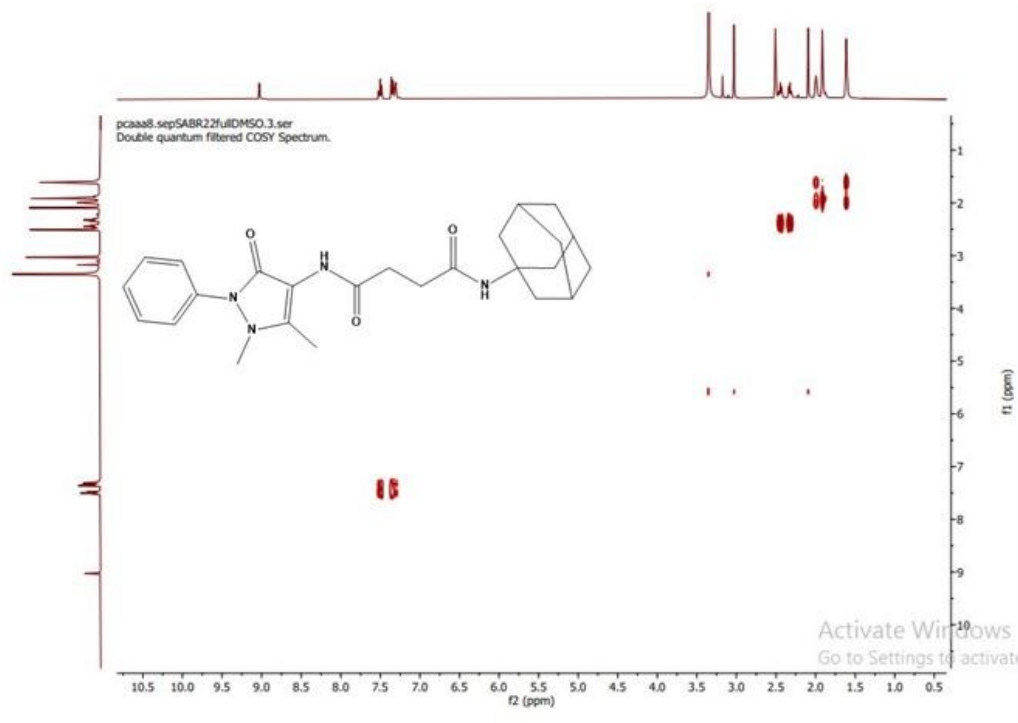

**Figure S22:** COSY spectrum of M1.

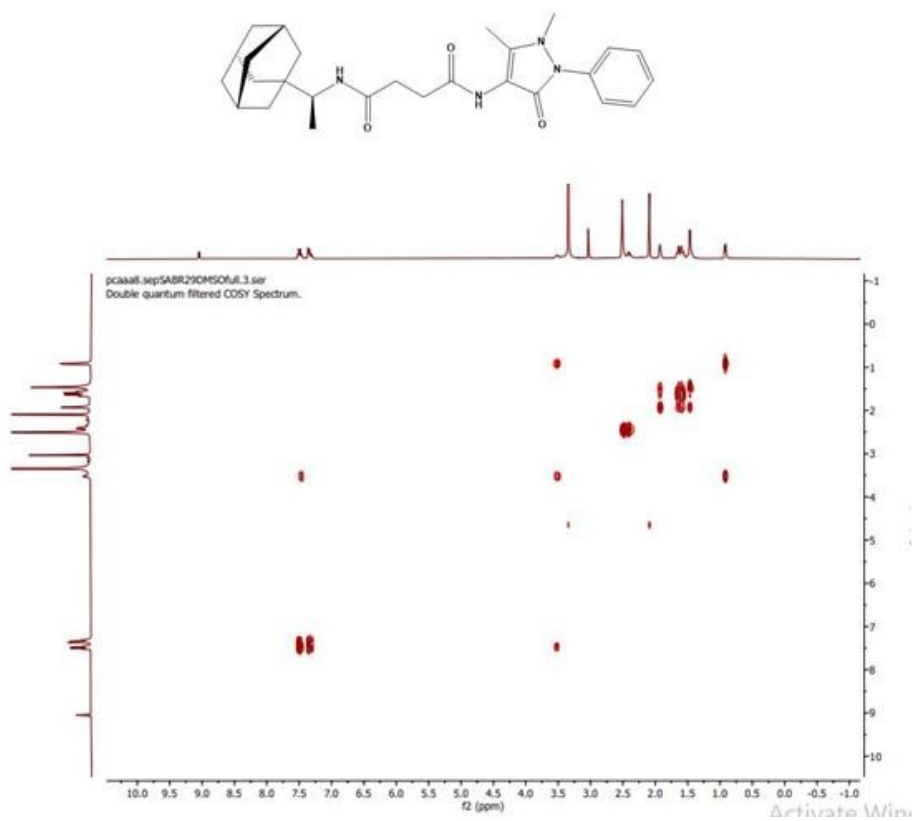

**Figure S23:** COSY spectrum of M2.

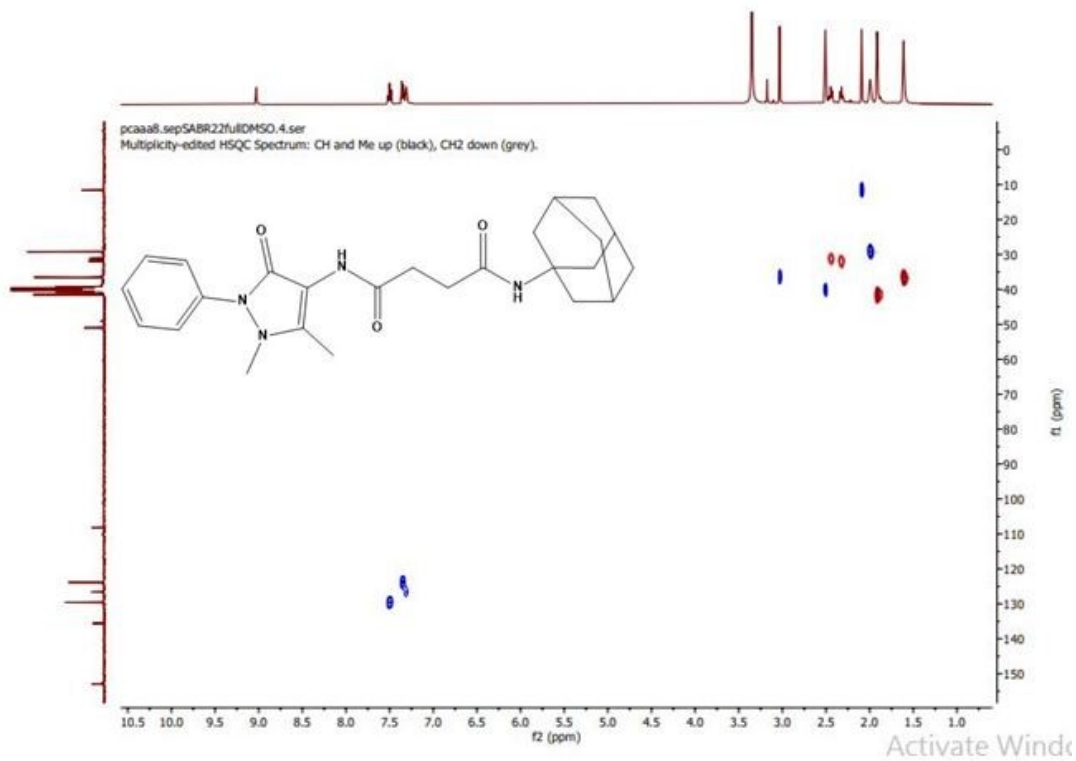

**Figure S24:** HSQC spectrum of M1.

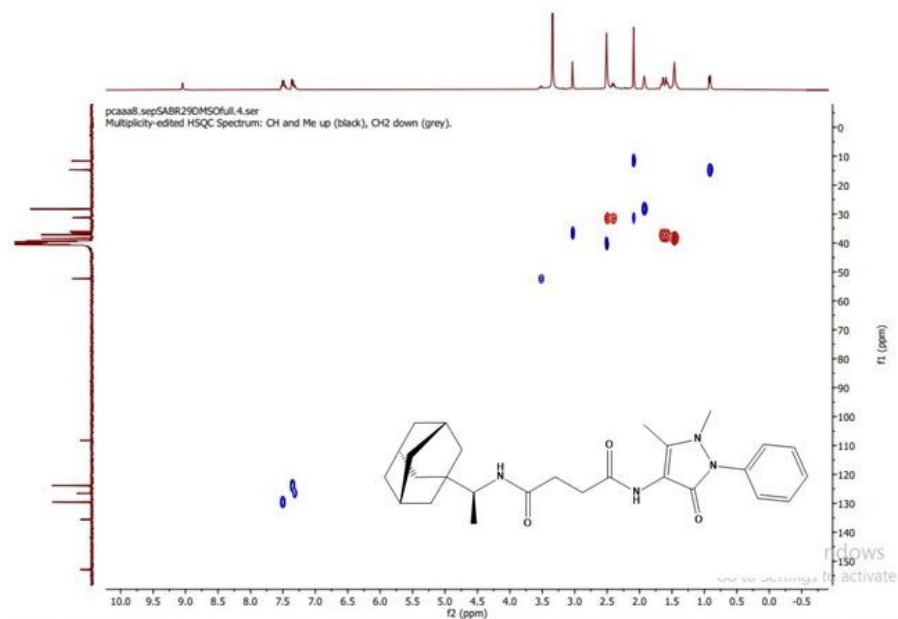

**Figure S25:** HSQC spectrum of M2.

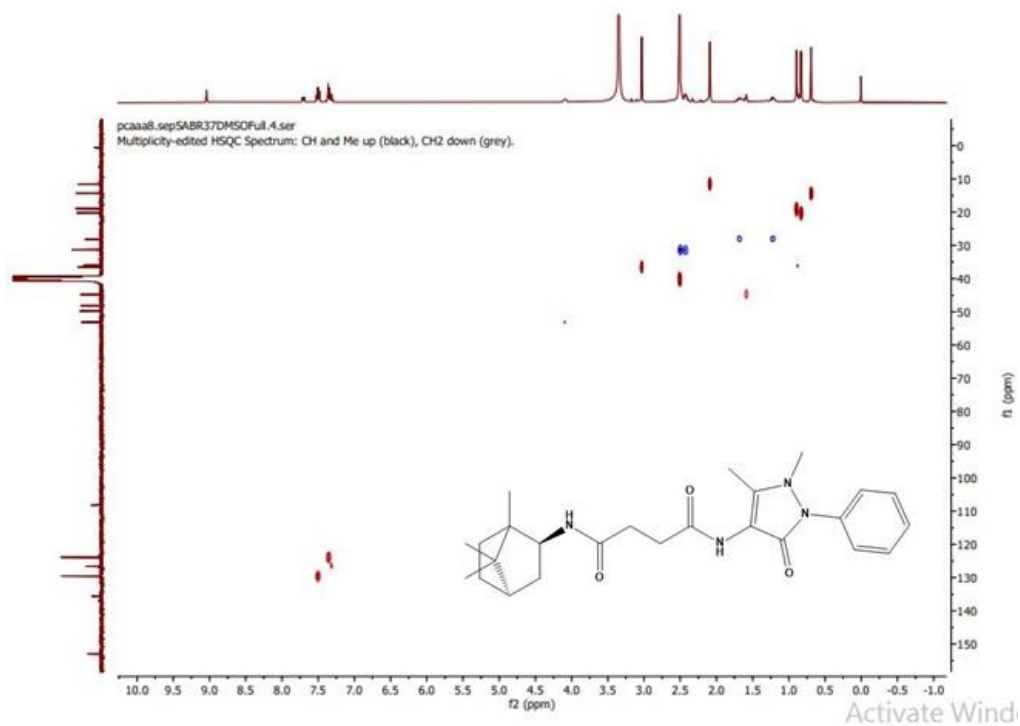

Figure S26: HSQC spectrum of M3.

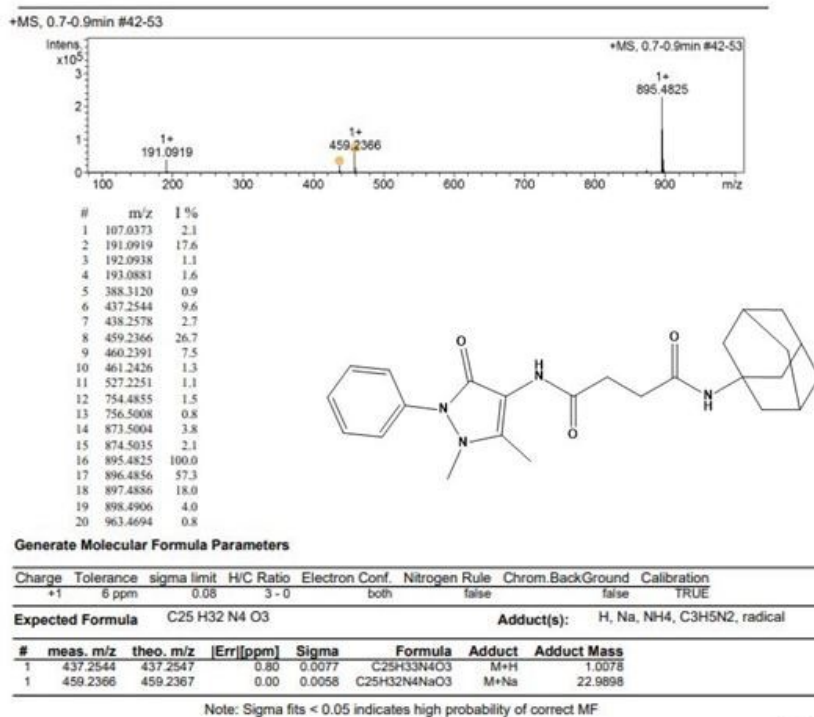

Figure S27: HRMS positive spectrum of M1.

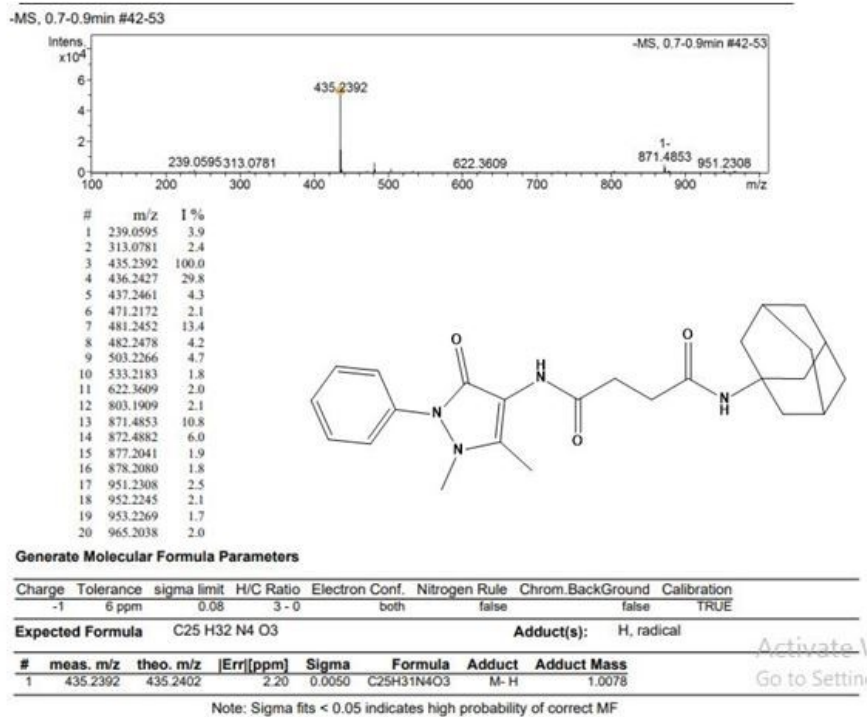

Figure S28: HRMS negative spectrum of M1.

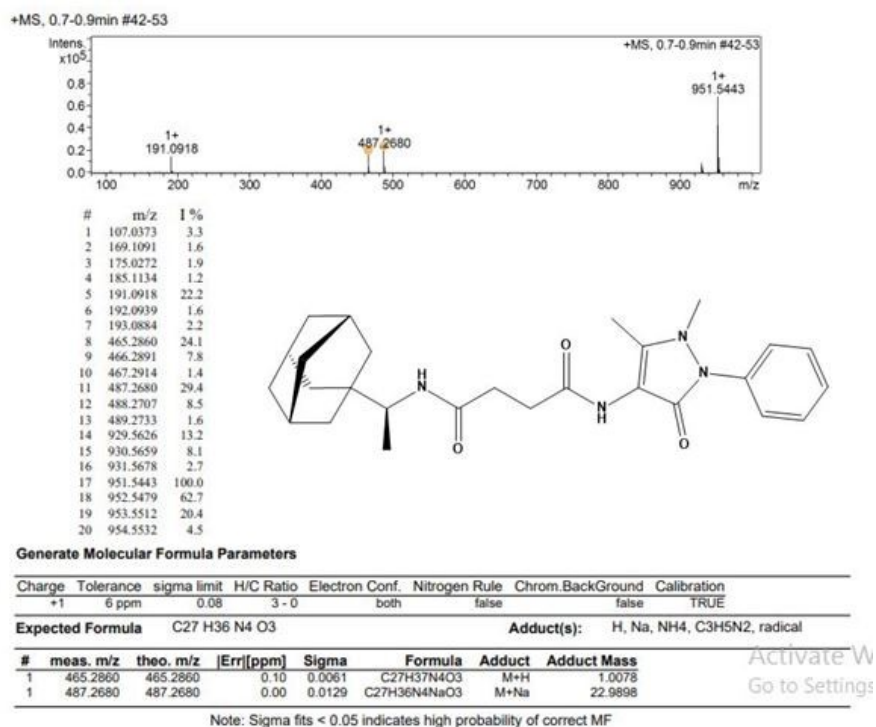

Figure S29: HRMS positive spectrum of M2.

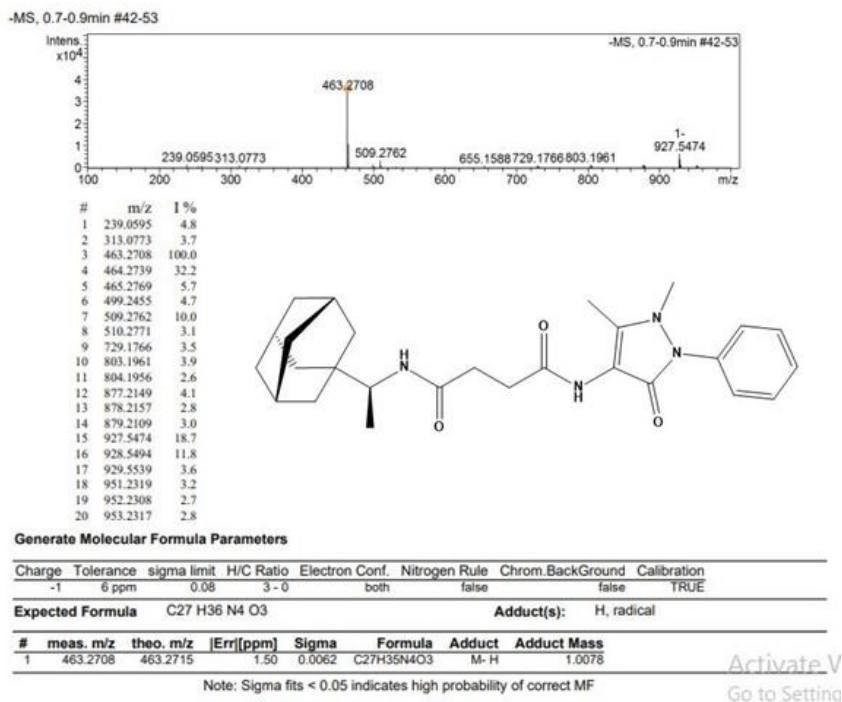

Figure S30: HRMS negative spectrum of M2.

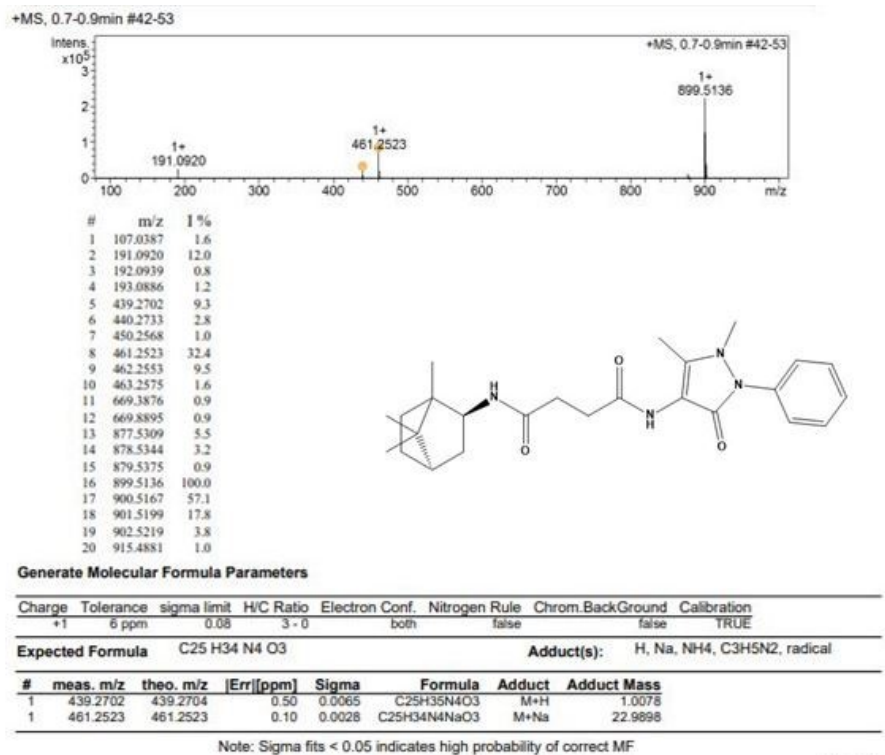

Figure S31: HRMS positive spectrum of M3.

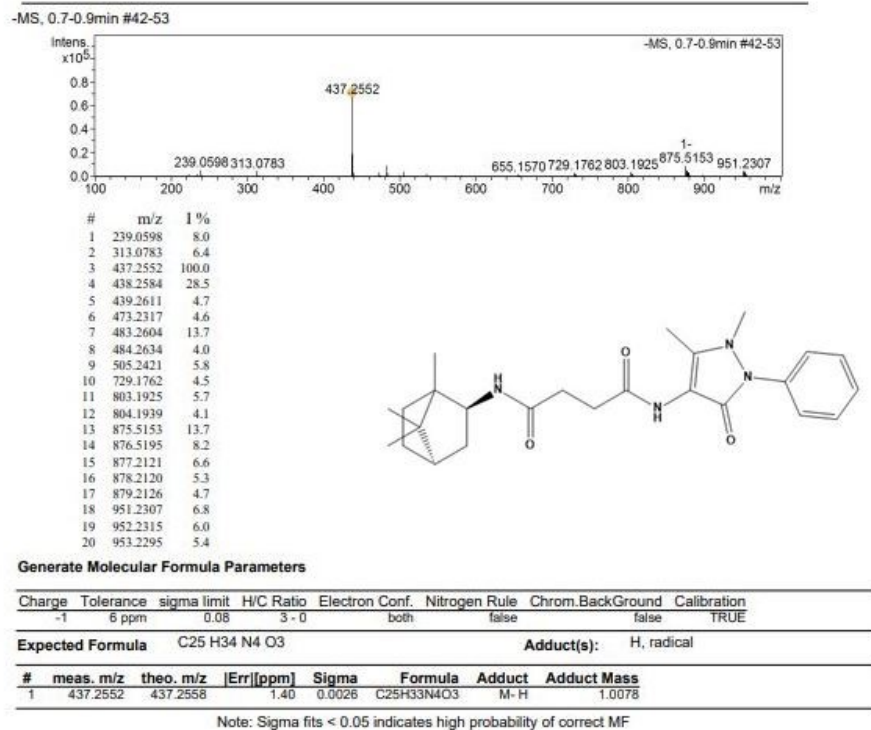

Figure S32: HRMS positive spectrum of M3.

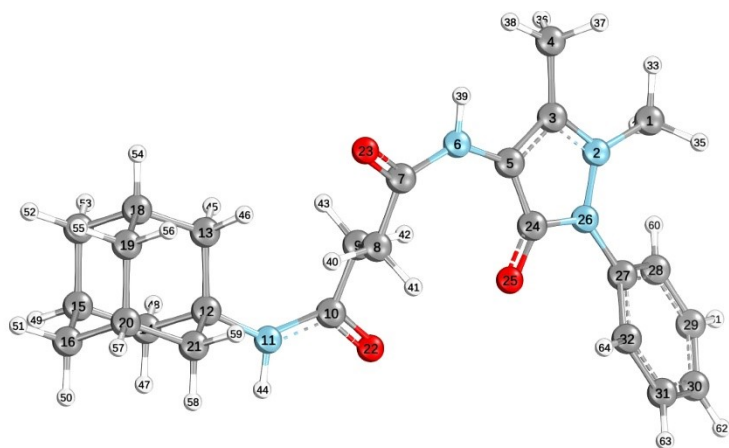

**M1**

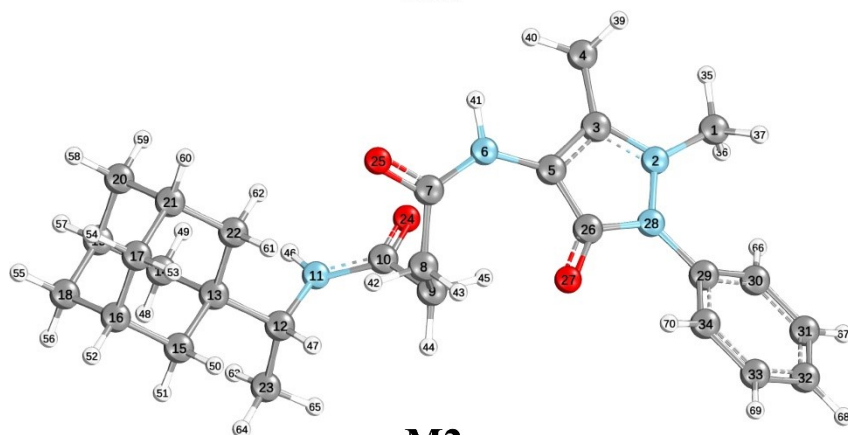

**M2**

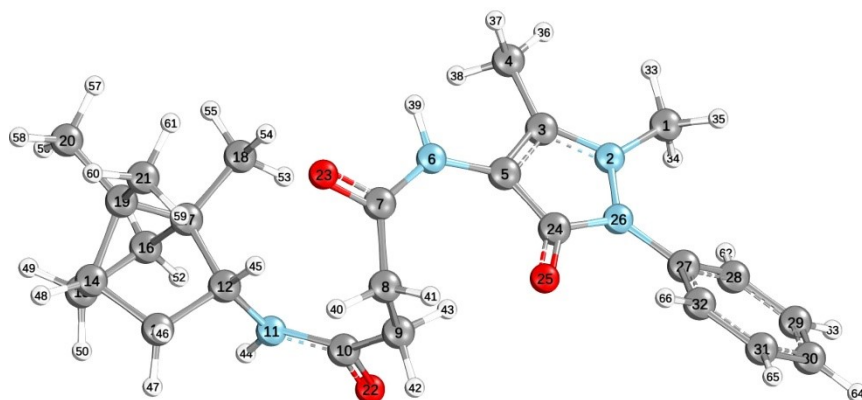

**M3**

**Figure S33:** 3D optimized structures of molecules M1, M2 and M3 with atoms numbers.

### 3.2.1.4. Adsorption isotherms

Temkin isotherm:

$$\theta = -\frac{1}{2a} \ln(K_{ads}) + \frac{1}{2a} \ln(C_{inh}) \quad 1$$

Freundlich isotherm:

$$\ln\theta = \ln(K_{ads}) + a \ln(C_{inh}) \quad 2$$

Flory-Huggins isotherm:

$$\log\left(\frac{\theta}{1-\theta}\right) = \log(K_{ads}) + y \log(C_{inh}) \quad 3$$

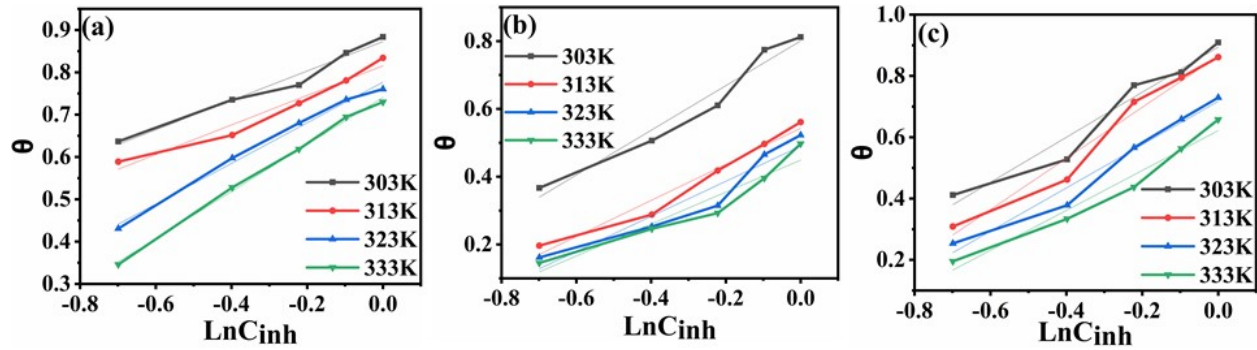

Figure S34. Temkin isotherm of M1 (a), M2 (b) and M3 (c)

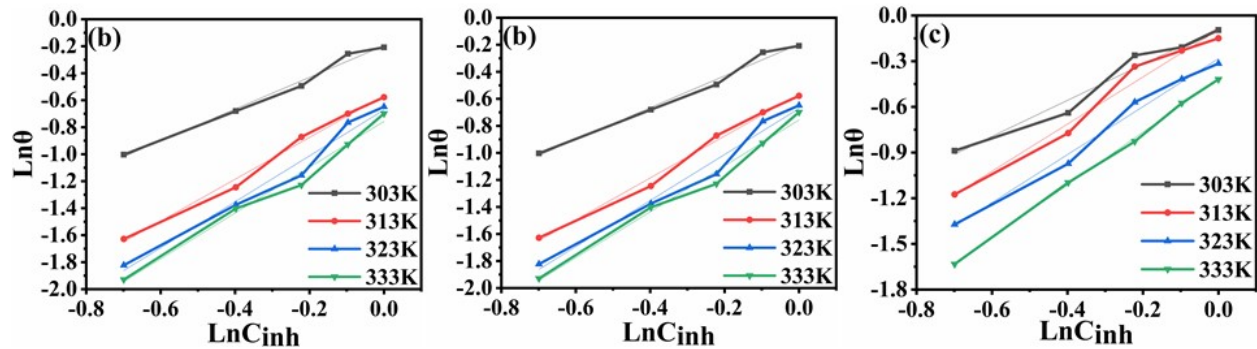

Figure S35. Freundlich isotherm of M1 (a), M2 (b) and M3 (c)

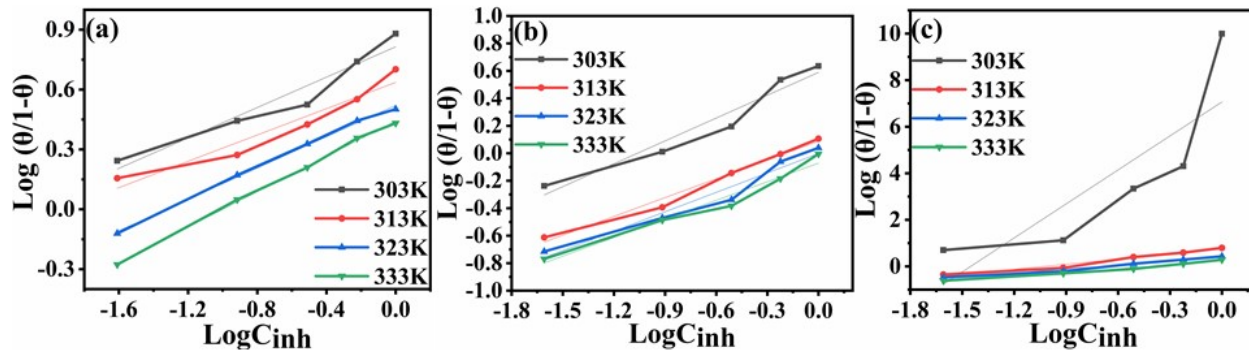

Figure S36. Flory-Huggins isotherm of M1 (a), M2 (b) and M3 (c)

Table S11. Comparison of  $R^2$  values of Temkin, Freundlich, Flory–Huggins and Langmuir isotherms

| Temperature (K) | Temkin Isotherm ( $R^2$ ) | Freundlich Isotherm ( $R^2$ ) | Flory–Huggins Isotherm ( $R^2$ ) | Langmuir isotherms ( $R^2$ ) (Best fitted) |
|-----------------|---------------------------|-------------------------------|----------------------------------|--------------------------------------------|
| <b>M1</b>       |                           |                               |                                  |                                            |
| 303             | 0.99                      | 0.97                          | 0.99                             | 0.99                                       |
| 313             | 0.98                      | 0.96                          | 0.99                             | 0.99                                       |
| 323             | 0.95                      | 0.97                          | 0.91                             | 0.99                                       |
| 333             | 0.96                      | 0.98                          | 0.91                             | 0.99                                       |
| <b>M2</b>       |                           |                               |                                  |                                            |
| 303             | 0.89                      | 0.97                          | 0.95                             | 0.96                                       |
| 313             | 0.88                      | 0.97                          | 0.94                             | 0.98                                       |
| 323             | 0.95                      | 0.98                          | 0.97                             | 0.93                                       |
| 333             | 0.94                      | 0.98                          | 0.92                             | 0.96                                       |
| <b>M3</b>       |                           |                               |                                  |                                            |
| 303             | 0.95                      | 0.99                          | 0.97                             | 0.99                                       |
| 313             | 0.96                      | 0.98                          | 0.96                             | 0.99                                       |
| 323             | 0.95                      | 0.96                          | 0.95                             | 0.99                                       |
| 333             | 0.93                      | 0.95                          | 0.58                             | 0.97                                       |
